# Supplementary material for: Integrated Metabolomic and Transcriptomic Analyses Reveal the Basis for Carotenoid Biosynthesis in Sweet Potato (Ipomoea batatas (L.) Lam.) Storage Roots
Source: MDPI journal article supplement (doi:10.3390/metabo12111010), 2022-10-23
Supplement: s1 [file s1]

**Table S2.** Statistical results of transcriptome data comparison with reference genomes.

| <b>Sample</b> | <b>Total Reads</b> | <b>Reads mapped</b> | <b>Unique mapped</b> | <b>Multi mapped</b> |
|---------------|--------------------|---------------------|----------------------|---------------------|
| BS-S2-1       | 44894540           | 38146209(84.97%)    | 32929203(73.35%)     | 8802082(11.62%)     |
| BS-S2-2       | 45110380           | 38163323(84.60%)    | 32657175(72.39%)     | 9480844(12.21%)     |
| BS-S2-3       | 45157956           | 38275128(84.76%)    | 32513513(72.00%)     | 9744092(12.76%)     |
| BS-S4-1       | 42299524           | 35729762(84.47%)    | 30542153(72.20%)     | 8744012(12.26%)     |
| BS-S4-2       | 43296616           | 36949575(85.34%)    | 32016651(73.95%)     | 8302765(11.39%)     |
| BS-S4-3       | 40352728           | 34510719(85.52%)    | 29627814(73.42%)     | 8253846(12.10%)     |
| S19-S2-1      | 45007686           | 38631146(85.83%)    | 32208681(71.56%)     | 10815311(14.27%)    |
| S19-S2-2      | 44715466           | 38499761(86.10%)    | 30647969(68.54%)     | 14153885(17.56%)    |
| S19-S2-3      | 44464158           | 37980234(85.42%)    | 32986455(74.19%)     | 8632176(11.23%)     |
| S19-S4-1      | 45809036           | 39093257(85.34%)    | 35686835(77.90%)     | 5580692(7.44%)      |
| S19-S4-2      | 47686774           | 41651652(87.34%)    | 36821145(77.21%)     | 8265663(10.13%)     |
| S19-S4-3      | 42636324           | 36532847(85.68%)    | 31492576(73.86%)     | 8440841(11.82%)     |
