# Supplementary material for: Integrated Metabolomic and Transcriptomic Analyses Reveal the Basis for Carotenoid Biosynthesis in Sweet Potato (Ipomoea batatas (L.) Lam.) Storage Roots
Source: MDPI journal article supplement (doi:10.3390/metabo12111010), 2022-10-23
Supplement: s1 [file s1]

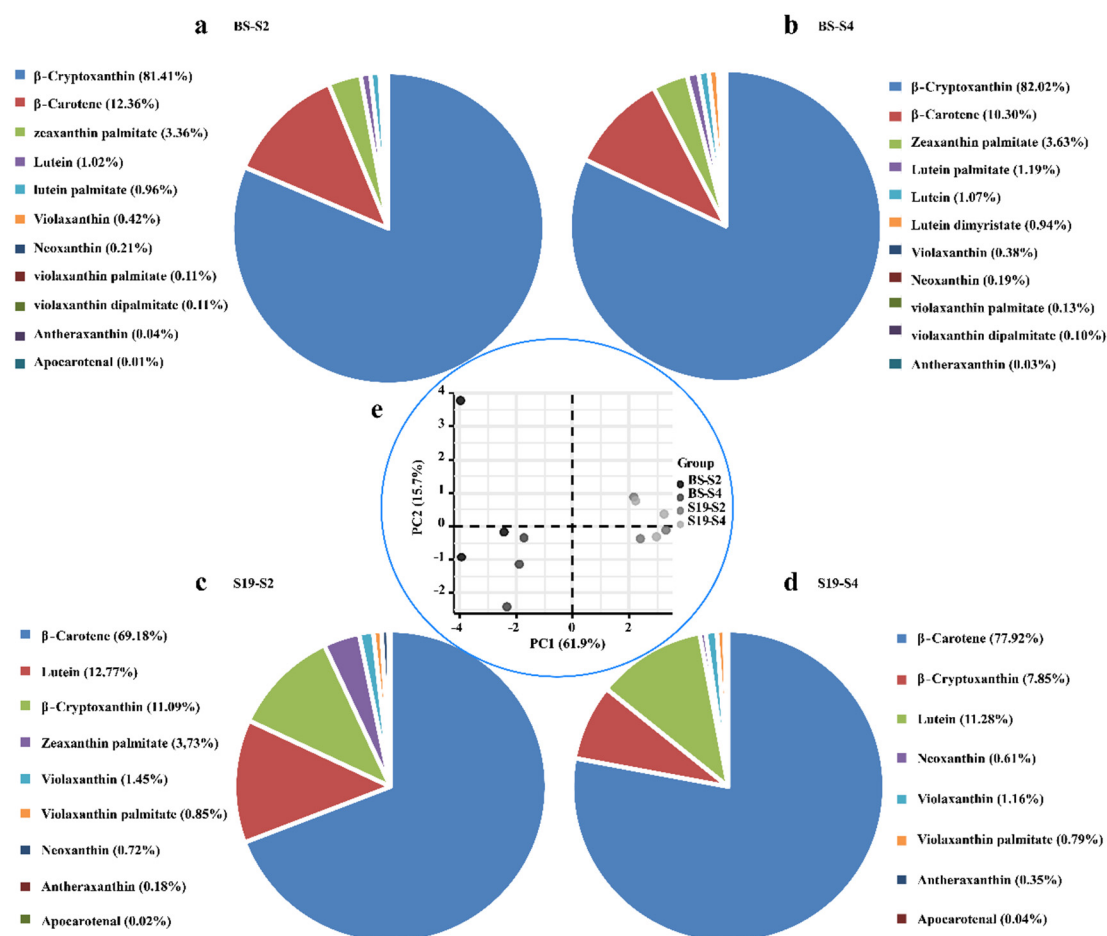

Supplementary Figure S1. Proportions of carotenoid levels and PCA analyses for the indicated samples. (a-d) The proportions of different carotenoids in the indicated sweet potato samples. (e) Principal Component Analysis plots for the indicated metabolites.
