# Supplementary material for: Integrated Metabolomic and Transcriptomic Analyses Reveal the Basis for Carotenoid Biosynthesis in Sweet Potato (Ipomoea batatas (L.) Lam.) Storage Roots
Source: MDPI journal article supplement (doi:10.3390/metabo12111010), 2022-10-23
Supplement: s1 [file s1]

**Table S1.** Summary of RNA-seq data and mapped reads for mRNA.

| Sample   | Raw Reads | Clean Reads | Clean Base(G) | Error Rate(%) | Q20(%) | Q30(%) | GC Content(%) |
|----------|-----------|-------------|---------------|---------------|--------|--------|---------------|
| BS-S2-1  | 47214446  | 44894540    | 6.73          | 0.03          | 96.84  | 91.68  | 48.33         |
| BS-S2-2  | 47964312  | 45110380    | 6.77          | 0.03          | 96.79  | 91.56  | 48.61         |
| BS-S2-3  | 48402810  | 45157956    | 6.77          | 0.03          | 97.00  | 92.04  | 49.02         |
| BS-S4-1  | 45100532  | 42299524    | 6.34          | 0.03          | 96.43  | 90.60  | 48.96         |
| BS-S4-2  | 45638012  | 43296616    | 6.49          | 0.03          | 97.03  | 92.03  | 48.16         |
| BS-S4-3  | 42557026  | 40352728    | 6.05          | 0.03          | 96.90  | 91.75  | 48.38         |
| S19-S2-1 | 47343718  | 45007686    | 6.75          | 0.03          | 97.06  | 92.15  | 48.36         |
| S19-S2-2 | 46731876  | 44715466    | 6.71          | 0.03          | 97.02  | 92.06  | 48.92         |
| S19-S2-3 | 46520062  | 44464158    | 6.67          | 0.03          | 96.86  | 91.63  | 47.62         |
| S19-S4-1 | 47924050  | 45809036    | 6.87          | 0.03          | 96.91  | 91.79  | 46.21         |
| S19-S4-2 | 46170330  | 44122566    | 6.62          | 0.03          | 96.75  | 91.40  | 45.64         |
| S19-S4-3 | 44706556  | 42636324    | 6.40          | 0.03          | 96.86  | 91.63  | 47.56         |
