# Supplementary material for: Integrated Metabolomic and Transcriptomic Analyses Reveal the Basis for Carotenoid Biosynthesis in Sweet Potato (Ipomoea batatas (L.) Lam.) Storage Roots
Source: Metabolites. 2022 Oct 23;12(11):1010. doi: 10.3390/metabo12111010 (PMC9699360; doi:10.3390/metabo12111010)
Supplement: Supplementary file 1 [file metabolites-12-01010-s001.zip]

Archive with 12 entries (12 files):
- Supplementary Figure S1. Proportions of carotenoid levels and PCA analyses for the indicated samples..pdf
- Supplementary Figure S2. KEGG classifications between different samples..pdf
- Supplementary Figure S3. KEGG classifications for the comparison of S19-S2 and BS-S2 samples. .pdf
- Supplementary Figure S4. KEGG classifications for the comparison of the S19-S4 and BS-S4 samples..pdf
- Table S1. Summary of RNA-seq data and mapped reads for mRNA. .pdf
- Table S2. Statistical results of transcriptome data comparison with reference genomes. .pdf
- Table S3 GO.enrichment.xlsx
- Table S4. Statistical table of DEGs in four groups of L14 and L19.xlsx
- Table S5. Statistical table of DAMs in four groups of samples.xlsx
- Table S6 TFs classification .xlsx
- Table S7 Transcription factor.xlsx
- Table S8. The gene-specific primers .xlsx
