# Supplementary material for: Integrated Metabolomic and Transcriptomic Analyses Reveal the Basis for Carotenoid Biosynthesis in Sweet Potato (Ipomoea batatas (L.) Lam.) Storage Roots
Source: Metabolites. 2022 Oct 23;12(11):1010. doi: 10.3390/metabo12111010 (PMC9699360; doi:10.3390/metabo12111010)
Supplement: Supplementary file 1 [file metabolites-12-01010-s001.zip › Table S3 GO.enrichment.xlsx]

## Sheet: BS-S2_vs_BS-S4
Ontology	ID	Description	GeneRatio	BgRatio	pvalue	p.adjust	geneID	Count	up	down
Cellular component	GO:0005871	kinesin complex	21/2186	80/25048	3.37418e-06	0.000971765	g10066/g13944/g16109/g178/g23669/g24218/g24290/g248/g31732/g42030/g42687/g43390/g54995/g56603/g59712/g59776/g60133/g60134/g60528/g9462/g971	21	2	19
Cellular component	GO:0005875	microtubule associated complex	28/2186	138/25048	1.99571e-05	0.00195802	g10066/g13272/g13944/g16109/g16902/g178/g19796/g19838/g23669/g24218/g24290/g248/g31732/g42030/g42687/g43390/g54995/g55267/g56603/g59712/g59776/g60133/g60134/g60528/g61022/g6188/g9462/g971	28	3	25
Cellular component	GO:0042807	central vacuole	7/2186	12/25048	2.0396e-05	0.00195802	g10331/g25653/g3611/g44188/g44217/g4812/g61049	7	1	6
Cellular component	GO:0015630	microtubule cytoskeleton	58/2186	407/25048	0.000142893	0.00761204	g10066/g1080/g13057/g13272/g13944/g15335/g1542/g16109/g1613/g16901/g16902/g17369/g178/g192/g19796/g19838/g20583/g23669/g24218/g24246/g24290/g248/g26767/g31333/g31666/g31732/g38689/g40610/g41581/g42030/g42687/g43390/g43652/g43654/g45701/g4973/g50507/g54221/g54995/g55215/g55267/g55796/g56603/g57076/g57082/g58196/g59712/g59776/g60133/g60134/g60528/g61022/g6188/g63729/g916/g9462/g971/g9986	58	8	50
Cellular component	GO:0099081	supramolecular polymer	51/2186	349/25048	0.000188923	0.00761204	g10066/g1080/g13944/g15335/g1542/g16109/g1613/g17369/g178/g192/g20583/g23669/g24218/g24246/g24290/g248/g26767/g31333/g31666/g31732/g38689/g40610/g41581/g42030/g42687/g43390/g43652/g43654/g45701/g49000/g4973/g50507/g5138/g54221/g54995/g55215/g56603/g57076/g57082/g58196/g59712/g59776/g60133/g60134/g60528/g6188/g63729/g916/g9462/g971/g9986	51	4	47
Cellular component	GO:0099512	supramolecular fiber	51/2186	349/25048	0.000188923	0.00761204	g10066/g1080/g13944/g15335/g1542/g16109/g1613/g17369/g178/g192/g20583/g23669/g24218/g24246/g24290/g248/g26767/g31333/g31666/g31732/g38689/g40610/g41581/g42030/g42687/g43390/g43652/g43654/g45701/g49000/g4973/g50507/g5138/g54221/g54995/g55215/g56603/g57076/g57082/g58196/g59712/g59776/g60133/g60134/g60528/g6188/g63729/g916/g9462/g971/g9986	51	4	47
Cellular component	GO:0099513	polymeric cytoskeletal fiber	51/2186	349/25048	0.000188923	0.00761204	g10066/g1080/g13944/g15335/g1542/g16109/g1613/g17369/g178/g192/g20583/g23669/g24218/g24246/g24290/g248/g26767/g31333/g31666/g31732/g38689/g40610/g41581/g42030/g42687/g43390/g43652/g43654/g45701/g49000/g4973/g50507/g5138/g54221/g54995/g55215/g56603/g57076/g57082/g58196/g59712/g59776/g60133/g60134/g60528/g6188/g63729/g916/g9462/g971/g9986	51	4	47
Cellular component	GO:0005874	microtubule	49/2186	333/25048	0.000211446	0.00761204	g10066/g1080/g13944/g15335/g1542/g16109/g1613/g17369/g178/g192/g20583/g23669/g24218/g24246/g24290/g248/g26767/g31333/g31666/g31732/g38689/g40610/g41581/g42030/g42687/g43390/g43652/g43654/g45701/g4973/g50507/g54221/g54995/g55215/g56603/g57076/g57082/g58196/g59712/g59776/g60133/g60134/g60528/g6188/g63729/g916/g9462/g971/g9986	49	4	45
Cellular component	GO:0099080	supramolecular complex	51/2186	353/25048	0.000250012	0.0080004	g10066/g1080/g13944/g15335/g1542/g16109/g1613/g17369/g178/g192/g20583/g23669/g24218/g24246/g24290/g248/g26767/g31333/g31666/g31732/g38689/g40610/g41581/g42030/g42687/g43390/g43652/g43654/g45701/g49000/g4973/g50507/g5138/g54221/g54995/g55215/g56603/g57076/g57082/g58196/g59712/g59776/g60133/g60134/g60528/g6188/g63729/g916/g9462/g971/g9986	51	4	47
Cellular component	GO:0031225	anchored component of membrane	39/2186	261/25048	0.000655799	0.018887	g11120/g11613/g13280/g162/g17395/g17396/g19281/g19417/g21016/g21022/g23169/g239/g23985/g24659/g25218/g25368/g26131/g26247/g30608/g30977/g31168/g31535/g34284/g3495/g37939/g41186/g43247/g4528/g4558/g53278/g54071/g54756/g54767/g57005/g59343/g60470/g61253/g63734/g9816	39	6	33
Cellular component	GO:0031226	intrinsic component of plasma membrane	61/2186	471/25048	0.00122336	0.0320298	g10331/g11120/g1277/g13273/g13783/g14314/g14387/g14425/g162/g17395/g17396/g1839/g1840/g19281/g19417/g21204/g23169/g239/g23985/g2448/g24659/g25368/g25653/g26131/g26247/g30977/g31168/g34284/g3495/g3611/g37939/g39020/g41186/g41296/g42995/g43247/g44188/g44217/g4528/g4558/g4812/g5297/g53278/g54071/g54756/g54767/g54953/g55355/g57893/g59343/g59436/g59817/g60470/g61049/g61253/g63734/g677/g8186/g8454/g873…	61	9	52
Cellular component	GO:0044430	cytoskeletal part	61/2186	481/25048	0.00202224	0.0485338	g10066/g1080/g13057/g13272/g13944/g15335/g1542/g16109/g1613/g16901/g16902/g17369/g178/g192/g19796/g19838/g20583/g23669/g24218/g24246/g24290/g248/g26767/g31333/g31666/g31732/g38689/g40610/g41581/g42030/g42687/g43390/g43652/g43654/g45701/g46347/g49000/g4973/g50507/g5138/g54221/g54995/g55215/g55267/g55796/g56603/g57076/g57082/g58196/g59712/g59776/g60133/g60134/g60528/g61022/g6188/g63729/g916/g9462/g…	61	9	52
Cellular component	GO:0046658	anchored component of plasma membrane	30/2186	201/25048	0.00262729	0.0582046	g11120/g162/g17395/g17396/g19281/g19417/g23169/g239/g23985/g24659/g25368/g26131/g26247/g30977/g31168/g34284/g3495/g37939/g41186/g43247/g4528/g4558/g53278/g54071/g54756/g54767/g59343/g60470/g61253/g63734	30	5	25
Cellular component	GO:0044815	DNA packaging complex	15/2186	80/25048	0.00357651	0.0735739	g25383/g27558/g29753/g34564/g4799/g4800/g48140/g4820/g48477/g62053/g62054/g62075/g62218/g8967/g9594	15	0	15
Cellular component	GO:0048046	apoplast	57/2186	467/25048	0.00624772	0.111872	g11974/g12121/g12646/g14257/g15633/g162/g16528/g17903/g18045/g185/g19777/g19966/g20424/g20505/g23481/g24659/g24960/g25193/g25541/g29104/g30545/g33083/g36079/g38995/g40897/g41293/g41859/g42074/g42077/g42078/g4616/g46695/g53119/g53797/g53989/g54378/g54657/g54659/g55174/g55198/g55329/g56220/g57284/g57848/g59680/g60232/g60512/g60581/g61253/g61562/g712/g7816/g7838/g7950/g7958/g7995/g8826	57	12	45
Cellular component	GO:0009534	chloroplast thylakoid	58/2186	478/25048	0.00660532	0.111872	g12843/g13161/g1326/g14249/g14255/g15620/g15752/g18111/g19548/g218/g23293/g23299/g24312/g25743/g26780/g280/g29909/g30627/g30628/g30850/g34775/g36554/g37937/g38044/g39043/g41187/g4159/g42791/g4314/g43412/g43432/g43435/g43959/g46535/g47774/g49533/g49978/g50500/g51191/g51406/g52957/g53218/g54338/g54350/g5445/g55180/g56269/g59328/g59454/g59795/g60170/g60543/g61185/g62131/g62132/g7747/g7933/g9721	58	3	55
Cellular component	GO:0031976	plastid thylakoid	58/2186	478/25048	0.00660532	0.111872	g12843/g13161/g1326/g14249/g14255/g15620/g15752/g18111/g19548/g218/g23293/g23299/g24312/g25743/g26780/g280/g29909/g30627/g30628/g30850/g34775/g36554/g37937/g38044/g39043/g41187/g4159/g42791/g4314/g43412/g43432/g43435/g43959/g46535/g47774/g49533/g49978/g50500/g51191/g51406/g52957/g53218/g54338/g54350/g5445/g55180/g56269/g59328/g59454/g59795/g60170/g60543/g61185/g62131/g62132/g7747/g7933/g9721	58	3	55
Cellular component	GO:0005788	endoplasmic reticulum lumen	13/2186	70/25048	0.00699198	0.111872	g1059/g23360/g35596/g35666/g40949/g41063/g42615/g47173/g61601/g61777/g61799/g61989/g752	13	2	11
Cellular component	GO:0000786	nucleosome	13/2186	76/25048	0.0138399	0.209731	g27558/g34564/g4799/g4800/g48140/g4820/g48477/g62053/g62054/g62075/g62218/g8967/g9594	13	0	13
Cellular component	GO:0032993	protein-DNA complex	17/2186	110/25048	0.0145647	0.209731	g1101/g27558/g34564/g4799/g4800/g48140/g4820/g48477/g49077/g4930/g59605/g62053/g62054/g62075/g62218/g8967/g9594	17	0	17
Cellular component	GO:0044436	thylakoid part	53/2186	452/25048	0.0169291	0.23217	g12843/g13161/g1326/g14249/g14255/g15620/g15752/g18111/g19548/g20022/g218/g23293/g23299/g24312/g25743/g26780/g280/g29909/g30627/g30628/g30850/g34775/g36554/g37937/g38044/g39043/g4159/g42791/g43118/g43412/g43432/g43435/g43959/g47774/g50500/g51191/g51406/g53218/g54338/g54350/g5445/g56269/g59328/g59454/g59795/g60170/g60543/g61185/g62131/g62132/g7747/g7933/g9721	53	2	51
Cellular component	GO:0009535	chloroplast thylakoid membrane	45/2186	384/25048	0.0262364	0.3285	g12843/g1326/g14249/g14255/g15620/g15752/g18111/g19548/g218/g23293/g23299/g24312/g25743/g26780/g280/g29909/g30850/g34775/g36554/g37937/g38044/g39043/g4159/g42791/g43412/g43435/g47774/g50500/g51191/g51406/g54338/g54350/g5445/g56269/g59328/g59454/g59795/g60170/g60543/g61185/g62131/g62132/g7747/g7933/g9721	45	2	43
Cellular component	GO:0055035	plastid thylakoid membrane	45/2186	384/25048	0.0262364	0.3285	g12843/g1326/g14249/g14255/g15620/g15752/g18111/g19548/g218/g23293/g23299/g24312/g25743/g26780/g280/g29909/g30850/g34775/g36554/g37937/g38044/g39043/g4159/g42791/g43412/g43435/g47774/g50500/g51191/g51406/g54338/g54350/g5445/g56269/g59328/g59454/g59795/g60170/g60543/g61185/g62131/g62132/g7747/g7933/g9721	45	2	43
Cellular component	GO:0009523	photosystem II	10/2186	58/25048	0.027375	0.3285	g20022/g24312/g26780/g280/g39043/g42791/g50500/g53218/g54350/g9721	10	0	10
Cellular component	GO:0009524	phragmoplast	23/2186	175/25048	0.0313752	0.361443	g1080/g13325/g13875/g13944/g15335/g1613/g17369/g192/g19842/g23670/g24246/g248/g31666/g41951/g42687/g43652/g43654/g54995/g55796/g57076/g57082/g59712/g847	23	2	21
Cellular component	GO:0034357	photosynthetic membrane	47/2186	412/25048	0.0354459	0.392631	g12843/g1326/g14249/g14255/g15620/g15752/g18111/g19548/g20022/g218/g23293/g23299/g24312/g25743/g26780/g280/g29909/g30850/g34775/g36554/g37937/g38044/g39043/g4159/g42791/g43412/g43435/g47774/g50500/g51191/g51406/g53218/g54338/g54350/g5445/g56269/g59328/g59454/g59795/g60170/g60543/g61185/g62131/g62132/g7747/g7933/g9721	47	2	45
Cellular component	GO:0042651	thylakoid membrane	46/2186	407/25048	0.0423791	0.450236	g12843/g1326/g14249/g14255/g15620/g15752/g18111/g19548/g218/g23293/g23299/g24312/g25743/g26780/g280/g29909/g30850/g34775/g36554/g37937/g38044/g39043/g4159/g42791/g43412/g43435/g47774/g50500/g51191/g51406/g53218/g54338/g54350/g5445/g56269/g59328/g59454/g59795/g60170/g60543/g61185/g62131/g62132/g7747/g7933/g9721	46	2	44
Cellular component	GO:0009543	chloroplast thylakoid lumen	10/2186	63/25048	0.0453363	0.450236	g13161/g15620/g26780/g30627/g30628/g30850/g42791/g43432/g43959/g53218	10	0	10
Cellular component	GO:0031978	plastid thylakoid lumen	10/2186	63/25048	0.0453363	0.450236	g13161/g15620/g26780/g30627/g30628/g30850/g42791/g43432/g43959/g53218	10	0	10
Cellular component	GO:0009505	plant-type cell wall	39/2186	345/25048	0.0574638	0.551653	g15510/g15567/g16957/g19281/g20038/g20283/g22836/g23985/g24520/g25776/g25936/g26131/g26247/g26304/g34061/g38995/g39022/g39389/g39643/g41241/g41687/g42074/g42077/g42078/g43064/g46695/g4923/g53293/g55174/g57848/g58637/g60232/g60651/g60672/g61049/g61812/g62017/g8826/g9422	39	5	34
Cellular component	GO:0032580	Golgi cisterna membrane	7/2186	41/25048	0.0623303	0.579069	g156/g26682/g39116/g54899/g54900/g60783/g9195	7	5	2
Cellular component	GO:0033597	mitotic checkpoint complex	3/2186	11/25048	0.0643777	0.579399	g7593/g849/g850	3	0	3
Cellular component	GO:0005887	integral component of plasma membrane	31/2186	271/25048	0.0731425	0.638335	g10331/g1277/g13273/g13783/g14314/g14387/g14425/g1839/g1840/g21204/g2448/g25653/g3611/g39020/g41296/g42995/g44188/g44217/g4812/g5297/g54953/g55355/g57893/g59436/g59817/g61049/g677/g8186/g8454/g8732/g8733	31	4	27
Cellular component	GO:0010494	cytoplasmic stress granule	7/2186	45/25048	0.0934311	0.791416	g16745/g21201/g55037/g55151/g58450/g6465/g9085	7	3	4
Cellular component	GO:0005819	spindle	14/2186	110/25048	0.0977083	0.804	g10066/g1080/g1542/g16901/g17369/g192/g24218/g24246/g248/g40610/g41581/g54995/g55796/g58196	14	3	11
Cellular component	GO:0000777	condensed chromosome kinetochore	4/2186	21/25048	0.104913	0.839306	g248/g30821/g31858/g40610	4	0	4
Cellular component	GO:0031977	thylakoid lumen	10/2186	75/25048	0.116316	0.905377	g13161/g15620/g26780/g30627/g30628/g30850/g42791/g43432/g43959/g53218	10	0	10
Cellular component	GO:0009654	photosystem II oxygen evolving complex	4/2186	22/25048	0.119821	0.908116	g26780/g42791/g53218/g9721	4	0	4
Cellular component	GO:0009521	photosystem	10/2186	77/25048	0.132116	0.954274	g20022/g24312/g26780/g280/g39043/g42791/g50500/g53218/g54350/g9721	10	0	10
Cellular component	GO:0000325	plant-type vacuole	27/2186	247/25048	0.132538	0.954274	g10331/g25653/g26328/g26909/g26910/g29451/g30168/g31351/g31353/g34606/g3611/g37800/g41709/g41748/g44188/g44217/g46632/g47776/g4812/g51750/g53989/g5831/g60482/g61049/g61385/g9057/g9511	27	5	22
Cellular component	GO:0019897	extrinsic component of plasma membrane	11/2186	88/25048	0.143491	1	g13852/g42933/g43504/g43505/g43508/g43521/g43522/g43643/g55945/g59025/g59028	11	11	0
Cellular component	GO:0000779	condensed chromosome, centromeric region	4/2186	24/25048	0.152117	1	g248/g30821/g31858/g40610	4	0	4
Cellular component	GO:0031985	Golgi cisterna	7/2186	53/25048	0.176524	1	g156/g26682/g39116/g54899/g54900/g60783/g9195	7	5	2
Cellular component	GO:0010287	plastoglobule	9/2186	73/25048	0.184234	1	g16430/g18111/g280/g29909/g38486/g39043/g43435/g54350/g59454	9	0	9
Cellular component	GO:0019898	extrinsic component of membrane	16/2186	146/25048	0.204484	1	g13852/g26780/g29558/g42791/g42933/g43504/g43505/g43508/g43521/g43522/g43643/g53218/g54147/g55945/g59025/g59028	16	11	5
Cellular component	GO:0000776	kinetochore	4/2186	27/25048	0.205737	1	g248/g30821/g31858/g40610	4	0	4
Cellular component	GO:0005667	transcription factor complex	15/2186	137/25048	0.214912	1	g10197/g20532/g24748/g25068/g25336/g25337/g31138/g397/g42011/g4367/g47882/g53661/g5515/g58304/g59927	15	6	9
Cellular component	GO:0005775	vacuolar lumen	2/2186	10/25048	0.215076	1	g15600/g25369	2	0	2
Cellular component	GO:0010598	NAD(P)H dehydrogenase complex (plastoquinone)	2/2186	10/25048	0.215076	1	g19548/g5445	2	0	2
Cellular component	GO:0030124	AP-4 adaptor complex	2/2186	10/25048	0.215076	1	g56411/g56413	2	0	2
Cellular component	GO:0019005	SCF ubiquitin ligase complex	9/2186	78/25048	0.238763	1	g29047/g36877/g41926/g4738/g51430/g53874/g53922/g58352/g63993	9	4	5
Cellular component	GO:0000782	telomere cap complex	2/2186	11/25048	0.248564	1	g4930/g59605	2	0	2
Cellular component	GO:0000783	nuclear telomere cap complex	2/2186	11/25048	0.248564	1	g4930/g59605	2	0	2
Cellular component	GO:0009705	plant-type vacuole membrane	15/2186	144/25048	0.274471	1	g10331/g25653/g29451/g30168/g3611/g41748/g44188/g44217/g46632/g47776/g4812/g60482/g61049/g61385/g9511	15	2	13
Cellular component	GO:0000778	condensed nuclear chromosome kinetochore	2/2186	12/25048	0.282188	1	g30821/g31858	2	0	2
Cellular component	GO:0071014	post-mRNA release spliceosomal complex	2/2186	12/25048	0.282188	1	g17207/g23153	2	1	1
Cellular component	GO:0005795	Golgi stack	7/2186	63/25048	0.309753	1	g156/g26682/g39116/g54899/g54900/g60783/g9195	7	5	2
Cellular component	GO:0009574	preprophase band	2/2186	13/25048	0.315669	1	g1613/g24246	2	0	2
Cellular component	GO:0005615	extracellular space	16/2186	161/25048	0.330863	1	g12240/g16746/g17180/g24337/g28289/g34606/g41293/g42074/g42077/g42078/g46137/g46551/g46695/g57627/g64097/g8886	16	6	10
Cellular component	GO:0042170	plastid membrane	35/2186	370/25048	0.333434	1	g11390/g12819/g14249/g14255/g1548/g15567/g16878/g18031/g19167/g20377/g20385/g25506/g26297/g29481/g31490/g34438/g36463/g36887/g38302/g42541/g42740/g4415/g47736/g47774/g54710/g58521/g58777/g58894/g61812/g62017/g62158/g63746/g953/g9838/g9928	35	5	30
Cellular component	GO:0031901	early endosome membrane	4/2186	34/25048	0.344915	1	g37636/g37637/g49453/g58803	4	0	4
Cellular component	GO:0009897	external side of plasma membrane	2/2186	14/25048	0.348776	1	g34263/g59507	2	0	2
Cellular component	GO:0032588	trans-Golgi network membrane	2/2186	14/25048	0.348776	1	g37636/g37637	2	0	2
Cellular component	GO:0009986	cell surface	3/2186	25/25048	0.374527	1	g34263/g34802/g59507	3	0	3
Cellular component	GO:0000932	P-body	11/2186	111/25048	0.375871	1	g16745/g21201/g27600/g28257/g4532/g55037/g55151/g58450/g6465/g9085/g9975	11	4	7
Cellular component	GO:0000780	condensed nuclear chromosome, centromeric region	2/2186	15/25048	0.381319	1	g30821/g31858	2	0	2
Cellular component	GO:0090575	RNA polymerase II transcription factor complex	7/2186	68/25048	0.382543	1	g20532/g24748/g25068/g25336/g25337/g4367/g58304	7	4	3
Cellular component	GO:0005811	lipid droplet	3/2186	26/25048	0.398952	1	g23869/g52961/g57649	3	0	3
Cellular component	GO:0048226	Casparian strip	3/2186	26/25048	0.398952	1	g25936/g34061/g39389	3	1	2
Cellular component	GO:0005884	actin filament	2/2186	16/25048	0.413145	1	g49000/g5138	2	0	2
Cellular component	GO:0016363	nuclear matrix	2/2186	16/25048	0.413145	1	g33775/g59911	2	1	1
Cellular component	GO:0005834	heterotrimeric G-protein complex	2/2186	17/25048	0.44413	1	g13852/g42933	2	2	0
Cellular component	GO:1905360	GTPase complex	2/2186	17/25048	0.44413	1	g13852/g42933	2	2	0
Cellular component	GO:0005765	lysosomal membrane	3/2186	28/25048	0.446912	1	g16901/g26304/g53293	3	1	2
Cellular component	GO:0098852	lytic vacuole membrane	3/2186	28/25048	0.446912	1	g16901/g26304/g53293	3	1	2
Cellular component	GO:0000323	lytic vacuole	8/2186	85/25048	0.466205	1	g16901/g26304/g34606/g37800/g46137/g53293/g5831/g767	8	2	6
Cellular component	GO:0008023	transcription elongation factor complex	3/2186	29/25048	0.470314	1	g20792/g49690/g49759	3	0	3
Cellular component	GO:0009510	plasmodesmatal desmotubule	2/2186	18/25048	0.474179	1	g5248/g5858	2	1	1
Cellular component	GO:0009511	plasmodesmatal endoplasmic reticulum	2/2186	18/25048	0.474179	1	g5248/g5858	2	1	1
Cellular component	GO:0030894	replisome	2/2186	18/25048	0.474179	1	g1101/g49077	2	0	2
Cellular component	GO:0031234	extrinsic component of cytoplasmic side of plasma membrane	2/2186	18/25048	0.474179	1	g13852/g42933	2	2	0
Cellular component	GO:0043601	nuclear replisome	2/2186	18/25048	0.474179	1	g1101/g49077	2	0	2
Cellular component	GO:0034399	nuclear periphery	4/2186	41/25048	0.485844	1	g33775/g511/g58850/g59911	4	2	2
Cellular component	GO:0000775	chromosome, centromeric region	6/2186	64/25048	0.490312	1	g248/g30821/g31858/g40610/g47780/g64138	6	0	6
Cellular component	GO:0009531	secondary cell wall	3/2186	30/25048	0.493257	1	g25936/g34061/g39389	3	1	2
Cellular component	GO:0031969	chloroplast membrane	32/2186	362/25048	0.49689	1	g11390/g12819/g14249/g14255/g1548/g15567/g16878/g20377/g20385/g25506/g26297/g29481/g31490/g34438/g36463/g36887/g38302/g42541/g42740/g4415/g47736/g47774/g54710/g58521/g58777/g58894/g61812/g62017/g62158/g63746/g953/g9928	32	5	27
Cellular component	GO:0000793	condensed chromosome	9/2186	100/25048	0.512589	1	g16902/g248/g25383/g29753/g30821/g31858/g33985/g40610/g55796	9	3	6
Cellular component	GO:0009527	plastid outer membrane	7/2186	77/25048	0.513028	1	g12819/g15567/g26297/g36887/g61812/g62017/g9928	7	2	5
Cellular component	GO:0009707	chloroplast outer membrane	7/2186	77/25048	0.513028	1	g12819/g15567/g26297/g36887/g61812/g62017/g9928	7	2	5
Cellular component	GO:0044798	nuclear transcription factor complex	7/2186	77/25048	0.513028	1	g20532/g24748/g25068/g25336/g25337/g4367/g58304	7	4	3
Cellular component	GO:0000152	nuclear ubiquitin ligase complex	3/2186	31/25048	0.515694	1	g2316/g30973/g34795	3	0	3
Cellular component	GO:0010282	senescence-associated vacuole	3/2186	31/25048	0.515694	1	g34606/g37800/g5831	3	1	2
Cellular component	GO:0044421	extracellular region part	16/2186	181/25048	0.516858	1	g12240/g16746/g17180/g24337/g28289/g34606/g41293/g42074/g42077/g42078/g46137/g46551/g46695/g57627/g64097/g8886	16	6	10
Cellular component	GO:0005764	lysosome	6/2186	66/25048	0.520987	1	g16901/g26304/g34606/g46137/g53293/g767	6	1	5
Cellular component	GO:0005905	clathrin-coated pit	5/2186	55/25048	0.530556	1	g50306/g56411/g56413/g606/g634	5	1	4
Cellular component	GO:0000159	protein phosphatase type 2A complex	2/2186	20/25048	0.5312	1	g31167/g55001	2	2	0
Cellular component	GO:0043596	nuclear replication fork	2/2186	20/25048	0.5312	1	g1101/g49077	2	0	2
Cellular component	GO:0035770	ribonucleoprotein granule	11/2186	125/25048	0.534491	1	g16745/g21201/g27600/g28257/g4532/g55037/g55151/g58450/g6465/g9085/g9975	11	4	7
Cellular component	GO:0036464	cytoplasmic ribonucleoprotein granule	11/2186	125/25048	0.534491	1	g16745/g21201/g27600/g28257/g4532/g55037/g55151/g58450/g6465/g9085/g9975	11	4	7
Cellular component	GO:0032300	mismatch repair complex	2/2186	21/25048	0.558082	1	g33985/g5464	2	2	0
Cellular component	GO:0005930	axoneme	1/2186	10/25048	0.598822	1	g6188	1	0	1
Cellular component	GO:0009513	etioplast	1/2186	10/25048	0.598822	1	g51100	1	0	1
Cellular component	GO:0009533	chloroplast stromal thylakoid	1/2186	10/25048	0.598822	1	g50500	1	0	1
Cellular component	GO:0030015	CCR4-NOT core complex	1/2186	10/25048	0.598822	1	g4532	1	0	1
Cellular component	GO:0032838	plasma membrane bounded cell projection cytoplasm	1/2186	10/25048	0.598822	1	g6188	1	0	1
Cellular component	GO:0044441	ciliary part	1/2186	10/25048	0.598822	1	g6188	1	0	1
Cellular component	GO:0097014	ciliary plasm	1/2186	10/25048	0.598822	1	g6188	1	0	1
Cellular component	GO:1990391	DNA repair complex	2/2186	24/25048	0.631985	1	g33985/g5464	2	2	0
Cellular component	GO:0000815	ESCRT III complex	1/2186	11/25048	0.633848	1	g34939	1	0	1
Cellular component	GO:0030286	dynein complex	1/2186	11/25048	0.633848	1	g6188	1	0	1
Cellular component	GO:0005744	TIM23 mitochondrial import inner membrane translocase complex	2/2186	25/25048	0.654373	1	g37615/g50155	2	1	1
Cellular component	GO:0008287	protein serine/threonine phosphatase complex	2/2186	25/25048	0.654373	1	g31167/g55001	2	2	0
Cellular component	GO:1903293	phosphatase complex	2/2186	25/25048	0.654373	1	g31167/g55001	2	2	0
Cellular component	GO:0005712	chiasma	1/2186	12/25048	0.665817	1	g33985	1	1	0
Cellular component	GO:0005782	peroxisomal matrix	1/2186	12/25048	0.665817	1	g34662	1	1	0
Cellular component	GO:0031519	PcG protein complex	1/2186	12/25048	0.665817	1	g2316	1	0	1
Cellular component	GO:0031907	microbody lumen	1/2186	12/25048	0.665817	1	g34662	1	1	0
Cellular component	GO:0032541	cortical endoplasmic reticulum	1/2186	12/25048	0.665817	1	g24844	1	0	1
Cellular component	GO:0042575	DNA polymerase complex	1/2186	12/25048	0.665817	1	g34691	1	0	1
Cellular component	GO:0009522	photosystem I	3/2186	39/25048	0.673508	1	g280/g39043/g54350	3	0	3
Cellular component	GO:0044426	cell wall part	3/2186	39/25048	0.673508	1	g25936/g34061/g39389	3	1	2
Cellular component	GO:0044462	external encapsulating structure part	3/2186	39/25048	0.673508	1	g25936/g34061/g39389	3	1	2
Cellular component	GO:0005758	mitochondrial intermembrane space	2/2186	26/25048	0.675658	1	g25730/g30871	2	1	1
Cellular component	GO:0000785	chromatin	19/2186	236/25048	0.677715	1	g17497/g25584/g27558/g33985/g34564/g38373/g43672/g47745/g4799/g4800/g48140/g4820/g48477/g62053/g62054/g62075/g62218/g8967/g9594	19	4	15
Cellular component	GO:0000974	Prp19 complex	1/2186	13/25048	0.694996	1	g60091	1	1	0
Cellular component	GO:0005779	integral component of peroxisomal membrane	1/2186	13/25048	0.694996	1	g34171	1	1	0
Cellular component	GO:0030014	CCR4-NOT complex	1/2186	13/25048	0.694996	1	g4532	1	0	1
Cellular component	GO:0031231	intrinsic component of peroxisomal membrane	1/2186	13/25048	0.694996	1	g34171	1	1	0
Cellular component	GO:0035267	NuA4 histone acetyltransferase complex	1/2186	13/25048	0.694996	1	g54386	1	1	0
Cellular component	GO:0000792	heterochromatin	2/2186	27/25048	0.695862	1	g17497/g38373	2	0	2
Cellular component	GO:0031514	motile cilium	2/2186	27/25048	0.695862	1	g35501/g6188	2	1	1
Cellular component	GO:0005769	early endosome	6/2186	80/25048	0.709004	1	g1041/g37636/g37637/g43731/g49453/g58803	6	2	4
Cellular component	GO:0000784	nuclear chromosome, telomeric region	2/2186	28/25048	0.715012	1	g4930/g59605	2	0	2
Cellular component	GO:0000151	ubiquitin ligase complex	21/2186	266/25048	0.716815	1	g2316/g29047/g30973/g34795/g36877/g38049/g41926/g42933/g4301/g4738/g51430/g53114/g53874/g53922/g55796/g58352/g58871/g59627/g60091/g63993/g986	21	9	12
Cellular component	GO:0005663	DNA replication factor C complex	1/2186	14/25048	0.721628	1	g34691	1	0	1
Cellular component	GO:0043189	H4/H2A histone acetyltransferase complex	1/2186	14/25048	0.721628	1	g54386	1	1	0
Cellular component	GO:1902562	H4 histone acetyltransferase complex	1/2186	14/25048	0.721628	1	g54386	1	1	0
Cellular component	GO:0005657	replication fork	3/2186	42/25048	0.72194	1	g1101/g34691/g49077	3	0	3
Cellular component	GO:0005684	U2-type spliceosomal complex	3/2186	42/25048	0.72194	1	g17207/g23153/g60091	3	2	1
Cellular component	GO:0000795	synaptonemal complex	2/2186	29/25048	0.733138	1	g16902/g33985	2	2	0
Cellular component	GO:0031970	organelle envelope lumen	2/2186	29/25048	0.733138	1	g25730/g30871	2	1	1
Cellular component	GO:0099086	synaptonemal structure	2/2186	29/25048	0.733138	1	g16902/g33985	2	2	0
Cellular component	GO:0030134	COPII-coated ER to Golgi transport vesicle	2/2186	30/25048	0.750273	1	g156/g17399	2	2	0
Cellular component	GO:0044463	cell projection part	2/2186	30/25048	0.750273	1	g43062/g6188	2	0	2
Cellular component	GO:0120038	plasma membrane bounded cell projection part	2/2186	30/25048	0.750273	1	g43062/g6188	2	0	2
Cellular component	GO:0031461	cullin-RING ubiquitin ligase complex	16/2186	212/25048	0.763683	1	g29047/g30973/g36877/g41926/g42933/g4738/g51430/g53114/g53874/g53922/g55796/g58352/g59627/g60091/g63993/g986	16	7	9
Cellular component	GO:0005815	microtubule organizing center	2/2186	31/25048	0.76645	1	g13057/g63729	2	1	1
Cellular component	GO:0005929	cilium	2/2186	31/25048	0.76645	1	g35501/g6188	2	1	1
Cellular component	GO:0000794	condensed nuclear chromosome	5/2186	73/25048	0.774583	1	g16902/g30821/g31858/g33985/g55796	5	3	2
Cellular component	GO:0005777	peroxisome	22/2186	290/25048	0.784369	1	g16057/g23950/g25730/g25746/g26200/g26220/g28952/g30871/g31013/g31014/g34171/g34662/g460/g47463/g50425/g5220/g54221/g54581/g55653/g58412/g59172/g60737	22	5	17
Cellular component	GO:0042579	microbody	22/2186	290/25048	0.784369	1	g16057/g23950/g25730/g25746/g26200/g26220/g28952/g30871/g31013/g31014/g34171/g34662/g460/g47463/g50425/g5220/g54221/g54581/g55653/g58412/g59172/g60737	22	5	17
Cellular component	GO:0005666	RNA polymerase III complex	1/2186	17/25048	0.788371	1	g54946	1	0	1
Cellular component	GO:0005736	RNA polymerase I complex	1/2186	17/25048	0.788371	1	g54946	1	0	1
Cellular component	GO:0070069	cytochrome complex	1/2186	17/25048	0.788371	1	g43118	1	0	1
Cellular component	GO:0009504	cell plate	3/2186	47/25048	0.789933	1	g13875/g43652/g43654	3	0	3
Cellular component	GO:0080008	Cul4-RING E3 ubiquitin ligase complex	6/2186	88/25048	0.790658	1	g30973/g42933/g53114/g59627/g60091/g986	6	2	4
Cellular component	GO:0000176	nuclear exosome (RNase complex)	1/2186	18/25048	0.806853	1	g21337	1	1	0
Cellular component	GO:0009514	glyoxysome	1/2186	18/25048	0.806853	1	g5220	1	1	0
Cellular component	GO:0010369	chromocenter	1/2186	18/25048	0.806853	1	g40610	1	0	1
Cellular component	GO:0000781	chromosome, telomeric region	2/2186	34/25048	0.809613	1	g4930/g59605	2	0	2
Cellular component	GO:0044427	chromosomal part	33/2186	434/25048	0.821077	1	g1101/g16902/g17497/g248/g25383/g25584/g27558/g29753/g30821/g31858/g33985/g34564/g34691/g38373/g40610/g43672/g47745/g47780/g4799/g4800/g48140/g4820/g48477/g49077/g4930/g59605/g62053/g62054/g62075/g62218/g64138/g8967/g9594	33	5	28
Cellular component	GO:0000307	cyclin-dependent protein kinase holoenzyme complex	1/2186	19/25048	0.823722	1	g26893	1	0	1
Cellular component	GO:0030686	90S preribosome	1/2186	19/25048	0.823722	1	g322	1	0	1
Cellular component	GO:0045335	phagocytic vesicle	1/2186	19/25048	0.823722	1	g3590	1	0	1
Cellular component	GO:0098552	side of membrane	4/2186	65/25048	0.83007	1	g13852/g34263/g42933/g59507	4	2	2
Cellular component	GO:0098687	chromosomal region	8/2186	120/25048	0.8322	1	g248/g30821/g31858/g40610/g47780/g4930/g59605/g64138	8	0	8
Cellular component	GO:0009898	cytoplasmic side of plasma membrane	2/2186	36/25048	0.834289	1	g13852/g42933	2	2	0
Cellular component	GO:0030119	AP-type membrane coat adaptor complex	2/2186	36/25048	0.834289	1	g56411/g56413	2	0	2
Cellular component	GO:0000177	cytoplasmic exosome (RNase complex)	1/2186	20/25048	0.839118	1	g21337	1	1	0
Cellular component	GO:0005677	chromatin silencing complex	1/2186	20/25048	0.839118	1	g47745	1	1	0
Cellular component	GO:0005876	spindle microtubule	1/2186	20/25048	0.839118	1	g40610	1	0	1
Cellular component	GO:0044450	microtubule organizing center part	1/2186	20/25048	0.839118	1	g63729	1	0	1
Cellular component	GO:0045261	proton-transporting ATP synthase complex, catalytic core F(1)	1/2186	20/25048	0.839118	1	g59328	1	0	1
Cellular component	GO:0071782	endoplasmic reticulum tubular network	1/2186	20/25048	0.839118	1	g24844	1	0	1
Cellular component	GO:0031201	SNARE complex	5/2186	84/25048	0.867309	1	g13875/g17399/g20665/g43096/g49453	5	2	3
Cellular component	GO:0090406	pollen tube	5/2186	84/25048	0.867309	1	g31398/g43062/g43064/g51915/g52138	5	2	3
Cellular component	GO:0000418	RNA polymerase IV complex	1/2186	24/25048	0.888383	1	g54946	1	0	1
Cellular component	GO:0005720	nuclear heterochromatin	1/2186	24/25048	0.888383	1	g17497	1	0	1
Cellular component	GO:0043076	megasporocyte nucleus	1/2186	24/25048	0.888383	1	g63231	1	0	1
Cellular component	GO:0043078	polar nucleus	1/2186	24/25048	0.888383	1	g63231	1	0	1
Cellular component	GO:0090568	nuclear transcriptional repressor complex	1/2186	24/25048	0.888383	1	g47745	1	1	0
Cellular component	GO:0031968	organelle outer membrane	8/2186	130/25048	0.889394	1	g12819/g15567/g26297/g34066/g36887/g61812/g62017/g9928	8	2	6
Cellular component	GO:0019867	outer membrane	8/2186	133/25048	0.903	1	g12819/g15567/g26297/g34066/g36887/g61812/g62017/g9928	8	2	6
Cellular component	GO:0000145	exocyst	3/2186	60/25048	0.904622	1	g3590/g41951/g9711	3	0	3
Cellular component	GO:0000178	exosome (RNase complex)	1/2186	26/25048	0.907033	1	g21337	1	1	0
Cellular component	GO:0012507	ER to Golgi transport vesicle membrane	1/2186	26/25048	0.907033	1	g17399	1	1	0
Cellular component	GO:1905354	exoribonuclease complex	1/2186	26/25048	0.907033	1	g21337	1	1	0
Cellular component	GO:0000123	histone acetyltransferase complex	1/2186	27/25048	0.915154	1	g54386	1	1	0
Cellular component	GO:0099568	cytoplasmic region	8/2186	138/25048	0.922523	1	g1613/g192/g24844/g3590/g41951/g6188/g63729/g9711	8	0	8
Cellular component	GO:0017053	transcriptional repressor complex	1/2186	28/25048	0.922567	1	g47745	1	1	0
Cellular component	GO:0000322	storage vacuole	1/2186	29/25048	0.929332	1	g61049	1	0	1
Cellular component	GO:0000326	protein storage vacuole	1/2186	29/25048	0.929332	1	g61049	1	0	1
Cellular component	GO:0005665	RNA polymerase II, core complex	1/2186	29/25048	0.929332	1	g54946	1	0	1
Cellular component	GO:0036452	ESCRT complex	1/2186	29/25048	0.929332	1	g34939	1	0	1
Cellular component	GO:0098562	cytoplasmic side of membrane	2/2186	49/25048	0.935395	1	g13852/g42933	2	2	0
Cellular component	GO:0055028	cortical microtubule	1/2186	30/25048	0.935507	1	g1613	1	0	1
Cellular component	GO:0005938	cell cortex	7/2186	128/25048	0.93725	1	g1613/g192/g24844/g3590/g41951/g63729/g9711	7	0	7
Cellular component	GO:0120025	plasma membrane bounded cell projection	7/2186	129/25048	0.940275	1	g31398/g35501/g43062/g43064/g51915/g52138/g6188	7	3	4
Cellular component	GO:0005771	multivesicular body	1/2186	31/25048	0.941142	1	g58803	1	0	1
Cellular component	GO:0035097	histone methyltransferase complex	1/2186	31/25048	0.941142	1	g2316	1	0	1
Cellular component	GO:0045259	proton-transporting ATP synthase complex	1/2186	31/25048	0.941142	1	g59328	1	0	1
Cellular component	GO:1902554	serine/threonine protein kinase complex	1/2186	32/25048	0.946285	1	g26893	1	0	1
Cellular component	GO:1902911	protein kinase complex	1/2186	32/25048	0.946285	1	g26893	1	0	1
Cellular component	GO:0005881	cytoplasmic microtubule	1/2186	33/25048	0.950979	1	g1613	1	0	1
Cellular component	GO:0042995	cell projection	7/2186	133/25048	0.951123	1	g31398/g35501/g43062/g43064/g51915/g52138/g6188	7	3	4
Cellular component	GO:0009706	chloroplast inner membrane	5/2186	104/25048	0.955012	1	g11390/g14249/g47774/g54710/g58521	5	0	5
Cellular component	GO:0030139	endocytic vesicle	1/2186	34/25048	0.955263	1	g3590	1	0	1
Cellular component	GO:0030981	cortical microtubule cytoskeleton	1/2186	34/25048	0.955263	1	g1613	1	0	1
Cellular component	GO:0031248	protein acetyltransferase complex	1/2186	34/25048	0.955263	1	g54386	1	1	0
Cellular component	GO:1902493	acetyltransferase complex	1/2186	34/25048	0.955263	1	g54386	1	1	0
Cellular component	GO:0009528	plastid inner membrane	5/2186	106/25048	0.959904	1	g11390/g14249/g47774/g54710/g58521	5	0	5
Cellular component	GO:0030133	transport vesicle	4/2186	91/25048	0.962512	1	g17399/g34490/g43062/g58335	4	1	3
Cellular component	GO:0048471	perinuclear region of cytoplasm	1/2186	36/25048	0.962741	1	g20439	1	0	1
Cellular component	GO:0034708	methyltransferase complex	1/2186	37/25048	0.965997	1	g2316	1	0	1
Cellular component	GO:0044448	cell cortex part	5/2186	110/25048	0.968254	1	g1613/g24844/g3590/g41951/g9711	5	0	5
Cellular component	GO:0030863	cortical cytoskeleton	1/2186	38/25048	0.968969	1	g1613	1	0	1
Cellular component	GO:0033178	proton-transporting two-sector ATPase complex, catalytic domain	1/2186	39/25048	0.971681	1	g59328	1	0	1
Cellular component	GO:0098797	plasma membrane protein complex	2/2186	60/25048	0.972013	1	g13852/g42933	2	2	0
Cellular component	GO:0000790	nuclear chromatin	5/2186	113/25048	0.973428	1	g17497/g33985/g4799/g4800/g9594	5	1	4
Cellular component	GO:0045177	apical part of cell	1/2186	40/25048	0.974156	1	g43062	1	0	1
Cellular component	GO:0044454	nuclear chromosome part	12/2186	220/25048	0.974229	1	g1101/g16902/g17497/g30821/g31858/g33985/g4799/g4800/g49077/g4930/g59605/g9594	12	2	10
Cellular component	GO:0031965	nuclear membrane	4/2186	97/25048	0.974348	1	g15198/g511/g58850/g61413	4	2	2
Cellular component	GO:1990204	oxidoreductase complex	5/2186	116/25048	0.977809	1	g26780/g42791/g53218/g60492/g9721	5	1	4
Cellular component	GO:0030658	transport vesicle membrane	2/2186	63/25048	0.977826	1	g17399/g34490	2	1	1
Cellular component	GO:0044438	microbody part	2/2186	64/25048	0.97949	1	g34171/g34662	2	2	0
Cellular component	GO:0044439	peroxisomal part	2/2186	64/25048	0.97949	1	g34171/g34662	2	2	0
Cellular component	GO:0000228	nuclear chromosome	13/2186	244/25048	0.983111	1	g1101/g16902/g17497/g30821/g31858/g33985/g4799/g4800/g49077/g4930/g55796/g59605/g9594	13	3	10
Cellular component	GO:0015629	actin cytoskeleton	3/2186	86/25048	0.983566	1	g46347/g49000/g5138	3	1	2
Cellular component	GO:0010008	endosome membrane	15/2186	275/25048	0.984456	1	g15879/g16901/g17399/g30654/g34402/g34939/g37388/g37636/g37637/g49453/g54899/g54900/g55238/g58803/g60783	15	5	10
Cellular component	GO:0099023	tethering complex	3/2186	88/25048	0.985747	1	g3590/g41951/g9711	3	0	3
Cellular component	GO:0016459	myosin complex	1/2186	47/25048	0.986378	1	g46347	1	1	0
Cellular component	GO:0044440	endosomal part	15/2186	279/25048	0.986941	1	g15879/g16901/g17399/g30654/g34402/g34939/g37388/g37636/g37637/g49453/g54899/g54900/g55238/g58803/g60783	15	5	10
Cellular component	GO:0030176	integral component of endoplasmic reticulum membrane	2/2186	72/25048	0.989079	1	g17270/g7411	2	1	1
Cellular component	GO:0031227	intrinsic component of endoplasmic reticulum membrane	2/2186	72/25048	0.989079	1	g17270/g7411	2	1	1
Cellular component	GO:0005759	mitochondrial matrix	5/2186	129/25048	0.990073	1	g20438/g43201/g54264/g54614/g58795	5	1	4
Cellular component	GO:0031301	integral component of organelle membrane	2/2186	74/25048	0.990686	1	g15198/g34171	2	2	0
Cellular component	GO:0005778	peroxisomal membrane	1/2186	52/25048	0.991379	1	g34171	1	1	0
Cellular component	GO:0031903	microbody membrane	1/2186	52/25048	0.991379	1	g34171	1	1	0
Cellular component	GO:0031300	intrinsic component of organelle membrane	2/2186	75/25048	0.9914	1	g15198/g34171	2	2	0
Cellular component	GO:0030136	clathrin-coated vesicle	3/2186	96/25048	0.991999	1	g50306/g606/g634	3	1	2
Cellular component	GO:0005741	mitochondrial outer membrane	1/2186	53/25048	0.992133	1	g34066	1	0	1
Cellular component	GO:0005747	mitochondrial respiratory chain complex I	1/2186	54/25048	0.992821	1	g60492	1	1	0
Cellular component	GO:0030684	preribosome	1/2186	54/25048	0.992821	1	g322	1	0	1
Cellular component	GO:0030964	NADH dehydrogenase complex	1/2186	54/25048	0.992821	1	g60492	1	1	0
Cellular component	GO:0045271	respiratory chain complex I	1/2186	54/25048	0.992821	1	g60492	1	1	0
Cellular component	GO:0044452	nucleolar part	2/2186	81/25048	0.994687	1	g322/g54946	2	0	2
Cellular component	GO:0031902	late endosome membrane	3/2186	104/25048	0.995559	1	g15879/g16901/g17399	3	2	1
Cellular component	GO:0016592	mediator complex	1/2186	61/25048	0.996218	1	g49022	1	1	0
Cellular component	GO:0005770	late endosome	5/2186	145/25048	0.996478	1	g1041/g15879/g16901/g17399/g58803	5	3	2
Cellular component	GO:0030117	membrane coat	2/2186	87/25048	0.996732	1	g56411/g56413	2	0	2
Cellular component	GO:0048475	coated membrane	2/2186	87/25048	0.996732	1	g56411/g56413	2	0	2
Cellular component	GO:0031966	mitochondrial membrane	20/2186	385/25048	0.996898	1	g11681/g18031/g19167/g21200/g21545/g25730/g27271/g29833/g30871/g34066/g37615/g50155/g5113/g55095/g60492/g60700/g62158/g62308/g806/g9838	20	8	12
Cellular component	GO:0012506	vesicle membrane	6/2186	166/25048	0.997132	1	g17399/g34490/g43062/g49853/g57893/g58677	6	3	3
Cellular component	GO:0030135	coated vesicle	5/2186	149/25048	0.9973	1	g156/g17399/g50306/g606/g634	5	3	2
Cellular component	GO:0055029	nuclear DNA-directed RNA polymerase complex	3/2186	113/25048	0.997737	1	g1101/g49077/g54946	3	0	3
Cellular component	GO:0005743	mitochondrial inner membrane	14/2186	303/25048	0.997945	1	g11681/g21545/g25730/g27271/g29833/g30871/g37615/g50155/g5113/g55095/g60492/g60700/g62158/g62308	14	7	7
Cellular component	GO:0005740	mitochondrial envelope	20/2186	395/25048	0.998014	1	g11681/g18031/g19167/g21200/g21545/g25730/g27271/g29833/g30871/g34066/g37615/g50155/g5113/g55095/g60492/g60700/g62158/g62308/g806/g9838	20	8	12
Cellular component	GO:0005798	Golgi-associated vesicle	2/2186	97/25048	0.998559	1	g156/g17399	2	2	0
Cellular component	GO:0016469	proton-transporting two-sector ATPase complex	1/2186	72/25048	0.998619	1	g59328	1	0	1
Cellular component	GO:0000428	DNA-directed RNA polymerase complex	3/2186	120/25048	0.99867	1	g1101/g49077/g54946	3	0	3
Cellular component	GO:0030880	RNA polymerase complex	3/2186	120/25048	0.99867	1	g1101/g49077/g54946	3	0	3
Cellular component	GO:0061695	transferase complex, transferring phosphorus-containing groups	5/2186	160/25048	0.998717	1	g1101/g26893/g34691/g49077/g54946	5	0	5
Cellular component	GO:0030659	cytoplasmic vesicle membrane	5/2186	161/25048	0.998802	1	g17399/g34490/g43062/g49853/g58677	5	2	3
Cellular component	GO:0098800	inner mitochondrial membrane protein complex	3/2186	122/25048	0.998859	1	g37615/g50155/g60492	3	2	1
Cellular component	GO:0019866	organelle inner membrane	20/2186	410/25048	0.999005	1	g11390/g11681/g14249/g15198/g21545/g25730/g27271/g29833/g30871/g37615/g47774/g50155/g5113/g54710/g55095/g58521/g60492/g60700/g62158/g62308	20	8	12
Cellular component	GO:0016591	RNA polymerase II, holoenzyme	1/2186	79/25048	0.999272	1	g54946	1	0	1
Cellular component	GO:0005746	mitochondrial respiratory chain	1/2186	81/25048	0.999394	1	g60492	1	1	0
Cellular component	GO:0098803	respiratory chain complex	1/2186	82/25048	0.999447	1	g60492	1	1	0
Cellular component	GO:0030660	Golgi-associated vesicle membrane	1/2186	83/25048	0.999496	1	g17399	1	1	0
Cellular component	GO:0070469	respiratory chain	2/2186	115/25048	0.999677	1	g60492/g60700	2	2	0
Cellular component	GO:0005635	nuclear envelope	5/2186	184/25048	0.99976	1	g15198/g40610/g511/g58850/g61413	5	2	3
Cellular component	GO:0044433	cytoplasmic vesicle part	19/2186	424/25048	0.999763	1	g15879/g16901/g17399/g30654/g34402/g34490/g34939/g37388/g37636/g37637/g43062/g49453/g49853/g54899/g54900/g55238/g58677/g58803/g60783	19	6	13
Cellular component	GO:0030662	coated vesicle membrane	1/2186	93/25048	0.999798	1	g17399	1	1	0
Cellular component	GO:0098798	mitochondrial protein complex	3/2186	147/25048	0.999837	1	g37615/g50155/g60492	3	2	1
Cellular component	GO:0022625	cytosolic large ribosomal subunit	2/2186	124/25048	0.999848	1	g10494/g31619	2	2	0
Cellular component	GO:0016604	nuclear body	3/2186	151/25048	0.999882	1	g27579/g29570/g30973	3	1	2
Cellular component	GO:0044455	mitochondrial membrane part	3/2186	152/25048	0.999891	1	g37615/g50155/g60492	3	2	1
Cellular component	GO:0000502	proteasome complex	1/2186	101/25048	0.999903	1	g18125	1	1	0
Cellular component	GO:1905369	endopeptidase complex	1/2186	101/25048	0.999903	1	g18125	1	1	0
Cellular component	GO:0005802	trans-Golgi network	14/2186	369/25048	0.999943	1	g13115/g13947/g20813/g26682/g30654/g34490/g37636/g37637/g39164/g43027/g53515/g54144/g58748/g63993	14	3	11
Cellular component	GO:0015934	large ribosomal subunit	2/2186	139/25048	0.999957	1	g10494/g31619	2	2	0
Cellular component	GO:1905368	peptidase complex	1/2186	110/25048	0.999958	1	g18125	1	1	0
Cellular component	GO:0016607	nuclear speck	1/2186	117/25048	0.999978	1	g27579	1	1	0
Cellular component	GO:0005681	spliceosomal complex	3/2186	214/25048	0.999999	1	g17207/g23153/g60091	3	2	1
Cellular component	GO:0022626	cytosolic ribosome	4/2186	249/25048	1	1	g10494/g31619/g49533/g49978	4	2	2
Cellular component	GO:0044451	nucleoplasm part	12/2186	421/25048	1	1	g20792/g2316/g27579/g29570/g30973/g47745/g49022/g49690/g49759/g53114/g54386/g54946	12	4	8
Cellular component	GO:0044445	cytosolic part	5/2186	308/25048	1	1	g10494/g31619/g49533/g49978/g60033	5	2	3
Cellular component	GO:0044391	ribosomal subunit	2/2186	250/25048	1	1	g10494/g31619	2	2	0
Molecular function	GO:0016701	oxidoreductase activity, acting on single donors with incorporation of molecular oxygen	24/2180	73/26545	1.7619e-09	1.28267e-06	g14249/g14255/g18795/g18933/g20747/g23509/g24646/g32184/g32267/g32268/g352/g38486/g40236/g41187/g4314/g43412/g43448/g47774/g53559/g54338/g54433/g55180/g55256/g57696	24	1	23
Molecular function	GO:0005372	water transmembrane transporter activity	15/2180	35/26545	3.31328e-08	8.04022e-06	g10331/g25653/g3611/g44188/g44217/g47776/g48011/g4812/g54953/g59817/g61049/g63889/g63893/g8732/g8733	15	1	14
Molecular function	GO:0015250	water channel activity	15/2180	35/26545	3.31328e-08	8.04022e-06	g10331/g25653/g3611/g44188/g44217/g47776/g48011/g4812/g54953/g59817/g61049/g63889/g63893/g8732/g8733	15	1	14
Molecular function	GO:0051213	dioxygenase activity	41/2180	202/26545	5.21551e-08	9.49222e-06	g11537/g11639/g13917/g18043/g18795/g18933/g20374/g20747/g21145/g21175/g23509/g24646/g25510/g26082/g29435/g29901/g30118/g31427/g32184/g32267/g32268/g34757/g352/g38373/g38486/g40236/g41187/g4314/g43412/g43448/g51398/g53559/g54334/g54338/g54433/g55180/g5548/g56590/g56783/g57696/g7702	41	8	33
Molecular function	GO:0016702	oxidoreductase activity, acting on single donors with incorporation of molecular oxygen, incorporation of two atoms of oxygen	19/2180	57/26545	6.65849e-08	9.69476e-06	g18795/g18933/g23509/g24646/g32184/g32267/g32268/g352/g38486/g40236/g41187/g4314/g43412/g43448/g53559/g54338/g54433/g55180/g57696	19	1	18
Molecular function	GO:0045548	phenylalanine ammonia-lyase activity	9/2180	14/26545	2.28729e-07	2.77525e-05	g19515/g19518/g25246/g54983/g57981/g57984/g57987/g57989/g63872	9	0	9
Molecular function	GO:0016841	ammonia-lyase activity	10/2180	18/26545	3.23433e-07	3.3637e-05	g16082/g19515/g19518/g25246/g54983/g57981/g57984/g57987/g57989/g63872	10	0	10
Molecular function	GO:0003777	microtubule motor activity	25/2180	103/26545	6.52098e-07	5.93409e-05	g10066/g13944/g1542/g16109/g178/g23669/g24218/g24290/g248/g31666/g31732/g41581/g42030/g42687/g43390/g54995/g56603/g58196/g59712/g59776/g60133/g60134/g60528/g9462/g971	25	2	23
Molecular function	GO:0015036	disulfide oxidoreductase activity	27/2180	118/26545	8.34224e-07	6.74795e-05	g16805/g2123/g21547/g24994/g25108/g28219/g3461/g37228/g39235/g39285/g41751/g42489/g47199/g49379/g50413/g5442/g5443/g54484/g57569/g59134/g8674/g8675/g9489/g9491/g9734/g9749/g9759	27	5	22
Molecular function	GO:0004857	enzyme inhibitor activity	42/2180	234/26545	1.20307e-06	8.75838e-05	g12646/g13511/g15633/g16812/g19566/g20500/g20503/g20504/g20505/g20806/g21686/g25363/g26522/g27905/g33083/g41882/g46677/g46679/g46886/g50907/g51015/g51018/g53119/g53515/g55084/g55144/g55329/g55453/g59313/g59388/g59605/g62112/g7794/g8369/g8370/g8373/g8410/g8412/g8413/g8414/g8416/g8417	42	1	41
Molecular function	GO:0016840	carbon-nitrogen lyase activity	11/2180	25/26545	1.68434e-06	0.000109125	g16082/g19515/g19518/g25246/g38063/g54983/g57981/g57984/g57987/g57989/g63872	11	0	11
Molecular function	GO:0017172	cysteine dioxygenase activity	8/2180	13/26545	1.80528e-06	0.000109125	g18795/g18933/g24646/g32184/g32267/g32268/g352/g53559	8	0	8
Molecular function	GO:0015035	protein disulfide oxidoreductase activity	24/2180	102/26545	1.96849e-06	0.000109125	g2123/g21547/g24994/g25108/g28219/g3461/g37228/g39235/g39285/g41751/g42489/g47199/g49379/g5442/g5443/g54484/g59134/g8674/g8675/g9489/g9491/g9734/g9749/g9759	24	4	20
Molecular function	GO:0038199	ethylene receptor activity	7/2180	10/26545	2.39835e-06	0.000109125	g13143/g13146/g25719/g43417/g5501/g8333/g8401	7	0	7
Molecular function	GO:0051740	ethylene binding	7/2180	10/26545	2.39835e-06	0.000109125	g13143/g13146/g25719/g43417/g5501/g8333/g8401	7	0	7
Molecular function	GO:0072328	alkene binding	7/2180	10/26545	2.39835e-06	0.000109125	g13143/g13146/g25719/g43417/g5501/g8333/g8401	7	0	7
Molecular function	GO:0016667	oxidoreductase activity, acting on a sulfur group of donors	29/2180	141/26545	3.37288e-06	0.000144439	g16805/g2123/g21547/g24994/g25108/g28219/g3461/g37228/g39235/g39285/g41751/g42489/g47199/g49379/g50413/g5442/g5443/g54484/g57569/g59134/g59342/g767/g8674/g8675/g9489/g9491/g9734/g9749/g9759	29	5	24
Molecular function	GO:0015238	drug transmembrane transporter activity	33/2180	187/26545	2.29142e-05	0.000926751	g11931/g15879/g16702/g17082/g20254/g20549/g21545/g24678/g25311/g25645/g26909/g26910/g29182/g29481/g29833/g29842/g31351/g31353/g3657/g39015/g42460/g43645/g4453/g46482/g46485/g50451/g51750/g53989/g54700/g57692/g62158/g62308/g9057	33	7	26
Molecular function	GO:0008017	microtubule binding	40/2180	248/26545	2.9698e-05	0.00103425	g10066/g1080/g13944/g15335/g1542/g16109/g1613/g17369/g178/g192/g23669/g24218/g24246/g24290/g248/g31333/g31666/g31732/g41581/g42030/g42687/g43390/g43652/g43654/g54221/g54995/g55215/g56603/g57076/g57082/g58196/g59712/g59776/g60016/g60133/g60134/g60528/g916/g9462/g971	40	2	38
Molecular function	GO:0004867	serine-type endopeptidase inhibitor activity	9/2180	22/26545	3.09562e-05	0.00103425	g8369/g8370/g8373/g8410/g8412/g8413/g8414/g8416/g8417	9	0	9
Molecular function	GO:0004866	endopeptidase inhibitor activity	22/2180	104/26545	3.12548e-05	0.00103425	g16812/g33083/g46677/g46679/g46886/g51015/g51018/g53119/g55329/g55453/g59388/g62112/g7794/g8369/g8370/g8373/g8410/g8412/g8413/g8414/g8416/g8417	22	0	22
Molecular function	GO:0030414	peptidase inhibitor activity	22/2180	104/26545	3.12548e-05	0.00103425	g16812/g33083/g46677/g46679/g46886/g51015/g51018/g53119/g55329/g55453/g59388/g62112/g7794/g8369/g8370/g8373/g8410/g8412/g8413/g8414/g8416/g8417	22	0	22
Molecular function	GO:0061135	endopeptidase regulator activity	22/2180	105/26545	3.65073e-05	0.00115554	g16812/g33083/g46677/g46679/g46886/g51015/g51018/g53119/g55329/g55453/g59388/g62112/g7794/g8369/g8370/g8373/g8410/g8412/g8413/g8414/g8416/g8417	22	0	22
Molecular function	GO:0061134	peptidase regulator activity	22/2180	106/26545	4.2537e-05	0.00129029	g16812/g33083/g46677/g46679/g46886/g51015/g51018/g53119/g55329/g55453/g59388/g62112/g7794/g8369/g8370/g8373/g8410/g8412/g8413/g8414/g8416/g8417	22	0	22
Molecular function	GO:0016709	oxidoreductase activity, acting on paired donors, with incorporation or reduction of molecular oxygen, NAD(P)H as one donor, and incorporation of one atom of oxygen	34/2180	204/26545	5.81876e-05	0.00166896	g1143/g13668/g14407/g16552/g16554/g17599/g17754/g24107/g24957/g25650/g29953/g29960/g32222/g39383/g39384/g41764/g41831/g41833/g42876/g47618/g47619/g48350/g48358/g48365/g4952/g5098/g5163/g56601/g58655/g59572/g60684/g9155/g9174/g9798	34	6	28
Molecular function	GO:0015291	secondary active transmembrane transporter activity	57/2180	409/26545	5.96057e-05	0.00166896	g11678/g11681/g11931/g13273/g13677/g13783/g14314/g14387/g14425/g15581/g15582/g15879/g16702/g17082/g1839/g1840/g1894/g20549/g22941/g24678/g25311/g26118/g26454/g29182/g29481/g29833/g29842/g34192/g34438/g36463/g39015/g39020/g41296/g41989/g43645/g4453/g46482/g46485/g50451/g5113/g5297/g53918/g54700/g54899/g54900/g57692/g58883/g58894/g59947/g59948/g60482/g60783/g61413/g677/g6980/g7087/g9511	57	12	45
Molecular function	GO:0009055	electron transfer activity	29/2180	164/26545	6.71455e-05	0.00181044	g17395/g17396/g19417/g21547/g239/g25108/g28219/g34115/g3461/g37937/g38044/g39235/g39285/g42489/g42791/g49379/g51100/g5442/g5443/g54484/g59134/g63734/g8674/g8675/g9489/g9491/g9734/g9749/g9759	29	1	28
Molecular function	GO:0019842	vitamin binding	33/2180	198/26545	7.41753e-05	0.00192856	g13917/g14228/g16082/g17260/g18243/g19369/g19396/g24467/g25809/g25912/g29094/g29435/g29943/g30118/g39368/g44452/g44501/g46258/g50321/g50322/g5071/g54240/g54614/g56380/g56381/g56428/g58795/g58854/g59114/g59194/g688/g7702/g8328	33	2	31
Molecular function	GO:0015631	tubulin binding	40/2180	259/26545	8.01424e-05	0.00201185	g10066/g1080/g13944/g15335/g1542/g16109/g1613/g17369/g178/g192/g23669/g24218/g24246/g24290/g248/g31333/g31666/g31732/g41581/g42030/g42687/g43390/g43652/g43654/g54221/g54995/g55215/g56603/g57076/g57082/g58196/g59712/g59776/g60016/g60133/g60134/g60528/g916/g9462/g971	40	2	38
Molecular function	GO:0047259	glucomannan 4-beta-mannosyltransferase activity	7/2180	15/26545	8.88944e-05	0.00208758	g41368/g47690/g47691/g48949/g48951/g55729/g55730	7	1	6
Molecular function	GO:1990939	ATP-dependent microtubule motor activity	7/2180	15/26545	8.88944e-05	0.00208758	g10066/g13944/g178/g24218/g248/g42030/g42687	7	0	7
Molecular function	GO:0005504	fatty acid binding	6/2180	11/26545	9.79862e-05	0.00222919	g185/g53797/g55198/g7950/g7958/g7995	6	0	6
Molecular function	GO:0003714	transcription corepressor activity	11/2180	37/26545	0.000128317	0.00283075	g13640/g29758/g31186/g31288/g31615/g35504/g37258/g53114/g55036/g55166/g60879	11	0	11
Molecular function	GO:0015293	symporter activity	29/2180	171/26545	0.000144145	0.0030864	g11678/g13273/g13677/g13783/g14314/g14387/g14425/g15581/g15582/g1839/g1840/g22941/g26118/g26454/g34192/g39020/g41296/g41989/g5297/g53918/g58883/g59947/g59948/g60482/g61413/g677/g6980/g7087/g9511	29	5	24
Molecular function	GO:0003774	motor activity	27/2180	156/26545	0.00017019	0.00353995	g10066/g13944/g1542/g16109/g178/g23669/g24218/g24290/g248/g31666/g31732/g41581/g42030/g42687/g43390/g46347/g54995/g56603/g58196/g59712/g59776/g60133/g60134/g60528/g6188/g9462/g971	27	3	24
Molecular function	GO:0031406	carboxylic acid binding	20/2180	101/26545	0.000183366	0.00360785	g13917/g185/g19566/g25912/g29435/g30118/g36877/g44452/g44501/g53797/g5433/g55198/g55591/g59194/g7702/g7950/g7958/g7995/g8328/g9506	20	3	17
Molecular function	GO:0043177	organic acid binding	20/2180	101/26545	0.000183366	0.00360785	g13917/g185/g19566/g25912/g29435/g30118/g36877/g44452/g44501/g53797/g5433/g55198/g55591/g59194/g7702/g7950/g7958/g7995/g8328/g9506	20	3	17
Molecular function	GO:0005342	organic acid transmembrane transporter activity	29/2180	178/26545	0.000292176	0.00545395	g11681/g12421/g14314/g14583/g17415/g20254/g25645/g29833/g30005/g30081/g34192/g34263/g34438/g36463/g3657/g38302/g3878/g41848/g41989/g42460/g56009/g57692/g59385/g59507/g60437/g61413/g620/g62308/g644	29	5	24
Molecular function	GO:0046943	carboxylic acid transmembrane transporter activity	29/2180	178/26545	0.000292176	0.00545395	g11681/g12421/g14314/g14583/g17415/g20254/g25645/g29833/g30005/g30081/g34192/g34263/g34438/g36463/g3657/g38302/g3878/g41848/g41989/g42460/g56009/g57692/g59385/g59507/g60437/g61413/g620/g62308/g644	29	5	24
Molecular function	GO:0008574	ATP-dependent microtubule motor activity, plus-end-directed	6/2180	13/26545	0.00031505	0.00573391	g10066/g13944/g178/g24218/g42030/g42687	6	0	6
Molecular function	GO:0008514	organic anion transmembrane transporter activity	34/2180	223/26545	0.000337104	0.00598564	g11681/g12421/g14314/g14583/g17415/g20254/g21545/g25645/g29833/g30005/g30081/g34192/g34263/g34438/g36463/g3657/g38302/g3878/g41848/g41989/g42460/g56009/g57692/g57893/g59385/g59507/g59947/g59948/g60437/g61385/g61413/g620/g62308/g644	34	7	27
Molecular function	GO:0030234	enzyme regulator activity	58/2180	448/26545	0.000376449	0.00640365	g12646/g13511/g15633/g16812/g17111/g186/g19566/g20500/g20503/g20504/g20505/g20806/g2123/g21686/g25363/g26522/g27905/g31167/g31713/g32212/g33083/g33531/g33561/g41882/g46677/g46679/g46886/g4704/g47963/g50907/g51015/g51018/g53119/g53515/g55001/g55084/g55144/g55329/g55453/g58189/g59313/g59388/g59605/g62112/g6355/g7593/g7794/g8369/g8370/g8373/g8410/g8412/g8413/g8414/g8416/g8417/g849/g850	58	7	51
Molecular function	GO:0016765	transferase activity, transferring alkyl or aryl (other than methyl) groups	31/2180	198/26545	0.000378238	0.00640365	g11630/g16057/g16805/g16874/g19369/g19396/g20966/g21558/g24356/g25223/g28952/g29257/g29283/g29615/g3054/g30619/g33531/g33561/g34080/g35146/g38646/g42079/g43396/g44868/g5453/g5455/g57375/g61185/g63805/g64048/g9035	31	3	28
Molecular function	GO:0008509	anion transmembrane transporter activity	47/2180	344/26545	0.000397765	0.00658121	g11681/g12421/g13115/g13273/g13947/g14314/g14583/g15581/g15582/g17415/g18447/g1894/g20254/g21200/g21545/g25645/g29833/g30005/g30081/g30168/g34192/g34263/g34438/g36463/g3657/g38302/g3878/g39020/g41848/g41989/g42460/g5297/g56009/g57692/g57893/g59385/g59507/g59947/g59948/g60437/g61053/g61385/g61413/g620/g62308/g644/g677	47	9	38
Molecular function	GO:0008515	sucrose transmembrane transporter activity	7/2180	19/26545	0.000518937	0.008038	g13783/g14387/g14425/g1839/g1840/g41296/g55355	7	0	7
Molecular function	GO:0015154	disaccharide transmembrane transporter activity	7/2180	19/26545	0.000518937	0.008038	g13783/g14387/g14425/g1839/g1840/g41296/g55355	7	0	7
Molecular function	GO:0015157	oligosaccharide transmembrane transporter activity	7/2180	19/26545	0.000518937	0.008038	g13783/g14387/g14425/g1839/g1840/g41296/g55355	7	0	7
Molecular function	GO:0019187	beta-1,4-mannosyltransferase activity	8/2180	25/26545	0.000619046	0.00919725	g41368/g47690/g47691/g48949/g48951/g49798/g55729/g55730	8	1	7
Molecular function	GO:0051753	mannan synthase activity	8/2180	25/26545	0.000619046	0.00919725	g41368/g47690/g47691/g48949/g48951/g49798/g55729/g55730	8	1	7
Molecular function	GO:0042562	hormone binding	12/2180	51/26545	0.000704178	0.0102528	g13143/g13146/g19566/g25719/g36877/g41992/g43417/g5433/g5501/g8333/g8401/g9506	12	1	11
Molecular function	GO:0015171	amino acid transmembrane transporter activity	20/2180	112/26545	0.000750379	0.0107113	g12421/g14314/g14583/g17415/g20254/g25645/g30005/g30081/g34192/g3657/g38302/g3878/g41848/g41989/g56009/g60437/g61413/g620/g62308/g644	20	3	17
Molecular function	GO:0016762	xyloglucan:xyloglucosyl transferase activity	9/2180	32/26545	0.000822131	0.0115098	g16528/g19777/g23481/g29104/g54378/g54657/g54659/g56220/g7816	9	4	5
Molecular function	GO:0004673	protein histidine kinase activity	10/2180	39/26545	0.000948078	0.0127815	g13143/g13146/g25719/g40511/g423/g43417/g50349/g5501/g8333/g8401	10	2	8
Molecular function	GO:0016775	phosphotransferase activity, nitrogenous group as acceptor	10/2180	39/26545	0.000948078	0.0127815	g13143/g13146/g25719/g40511/g423/g43417/g50349/g5501/g8333/g8401	10	2	8
Molecular function	GO:0030170	pyridoxal phosphate binding	21/2180	123/26545	0.00102657	0.0133454	g14228/g16082/g17260/g18243/g19369/g19396/g25809/g29094/g29943/g39368/g46258/g50321/g50322/g5071/g54240/g54614/g56380/g56381/g56428/g58795/g688	21	1	20
Molecular function	GO:0070279	vitamin B6 binding	21/2180	123/26545	0.00102657	0.0133454	g14228/g16082/g17260/g18243/g19369/g19396/g25809/g29094/g29943/g39368/g46258/g50321/g50322/g5071/g54240/g54614/g56380/g56381/g56428/g58795/g688	21	1	20
Molecular function	GO:0001134	transcription regulator recruiting activity	20/2180	117/26545	0.0013155	0.0165118	g10049/g10520/g13125/g13520/g25699/g25936/g28924/g28993/g30119/g33626/g35053/g39254/g41863/g41923/g4815/g52884/g60377/g63073/g9635/g980	20	9	11
Molecular function	GO:0001135	RNA polymerase II transcription regulator recruiting activity	20/2180	117/26545	0.0013155	0.0165118	g10049/g10520/g13125/g13520/g25699/g25936/g28924/g28993/g30119/g33626/g35053/g39254/g41863/g41923/g4815/g52884/g60377/g63073/g9635/g980	20	9	11
Molecular function	GO:0000155	phosphorelay sensor kinase activity	9/2180	35/26545	0.00165363	0.0204041	g13143/g13146/g25719/g423/g43417/g50349/g5501/g8333/g8401	9	1	8
Molecular function	GO:0004869	cysteine-type endopeptidase inhibitor activity	6/2180	18/26545	0.00238153	0.028896	g16812/g51015/g51018/g59388/g62112/g7794	6	0	6
Molecular function	GO:0033293	monocarboxylic acid binding	9/2180	37/26545	0.00250981	0.0299531	g185/g19566/g36877/g53797/g55198/g55591/g7950/g7958/g7995	9	2	7
Molecular function	GO:0004337	geranyltranstransferase activity	5/2180	14/26545	0.00396243	0.0465266	g11630/g16874/g29257/g29283/g38646	5	1	4
Molecular function	GO:0004650	polygalacturonase activity	12/2180	62/26545	0.00413724	0.0478082	g11960/g12107/g17486/g19645/g26131/g26247/g26869/g30343/g40874/g49813/g54803/g9463	12	2	10
Molecular function	GO:0004311	farnesyltranstransferase activity	5/2180	15/26545	0.00554573	0.0622913	g11630/g16874/g29257/g29283/g38646	5	1	4
Molecular function	GO:0016830	carbon-carbon lyase activity	20/2180	132/26545	0.00556172	0.0622913	g1206/g23312/g23327/g24467/g25524/g25746/g44161/g45357/g46632/g46697/g48726/g50321/g50322/g50425/g55229/g58139/g58854/g59114/g60258/g9966	20	4	16
Molecular function	GO:0015175	neutral amino acid transmembrane transporter activity	7/2180	28/26545	0.00633815	0.0699117	g20254/g25645/g34192/g3657/g41989/g620/g644	7	2	5
Molecular function	GO:0000030	mannosyltransferase activity	8/2180	35/26545	0.00644626	0.070043	g41368/g47690/g47691/g48949/g48951/g49798/g55729/g55730	8	1	7
Molecular function	GO:0016744	transferase activity, transferring aldehyde or ketonic groups	6/2180	22/26545	0.007203	0.0771145	g16803/g44940/g44968/g54990/g6783/g7563	6	0	6
Molecular function	GO:0050661	NADP binding	14/2180	83/26545	0.00739631	0.0780364	g13379/g18031/g18387/g19167/g23717/g32551/g32562/g38959/g5438/g54791/g59566/g9155/g9174/g9838	14	0	14
Molecular function	GO:0008559	xenobiotic transmembrane transporting ATPase activity	7/2180	29/26545	0.00777343	0.0794776	g26909/g26910/g31351/g31353/g51750/g53989/g9057	7	2	5
Molecular function	GO:0042910	xenobiotic transmembrane transporter activity	7/2180	29/26545	0.00777343	0.0794776	g26909/g26910/g31351/g31353/g51750/g53989/g9057	7	2	5
Molecular function	GO:0008171	O-methyltransferase activity	12/2180	67/26545	0.00786042	0.0794776	g1100/g27492/g27493/g46588/g54501/g54560/g54578/g54579/g553/g63360/g63382/g63758	12	0	12
Molecular function	GO:0016706	oxidoreductase activity, acting on paired donors, with incorporation or reduction of molecular oxygen, 2-oxoglutarate as one donor, and incorporation of one atom each of oxygen into both donors	12/2180	68/26545	0.00884933	0.0881341	g13917/g21145/g21175/g26082/g29435/g29901/g30118/g31427/g34757/g54334/g5548/g7702	12	5	7
Molecular function	GO:0004564	beta-fructofuranosidase activity	6/2180	23/26545	0.00907975	0.0881341	g15600/g19034/g23246/g25369/g41626/g44130	6	3	3
Molecular function	GO:0004575	sucrose alpha-glucosidase activity	6/2180	23/26545	0.00907975	0.0881341	g15600/g19034/g23246/g25369/g41626/g44130	6	3	3
Molecular function	GO:0004708	MAP kinase kinase activity	4/2180	11/26545	0.00935351	0.0884332	g19842/g31713/g6355/g6380	4	0	4
Molecular function	GO:0018685	alkane 1-monooxygenase activity	4/2180	11/26545	0.00935351	0.0884332	g10719/g10724/g40205/g58155	4	0	4
Molecular function	GO:0000981	DNA-binding transcription factor activity, RNA polymerase II-specific	29/2180	224/26545	0.00982411	0.0916917	g10049/g10197/g10520/g13125/g13520/g25699/g25936/g26525/g28924/g28993/g30119/g31138/g33626/g35053/g39254/g397/g41863/g41923/g42011/g47882/g4815/g52884/g5515/g57590/g60377/g63073/g7739/g9635/g980	29	12	17
Molecular function	GO:0016717	oxidoreductase activity, acting on paired donors, with oxidation of a pair of donors resulting in the reduction of molecular oxygen to two molecules of water	6/2180	24/26545	0.0112813	0.103959	g20377/g20385/g25506/g31490/g42363/g49940	6	0	6
Molecular function	GO:0015294	solute:cation symporter activity	13/2180	79/26545	0.0118071	0.107445	g11678/g13677/g13783/g14387/g14425/g1839/g22941/g59947/g59948/g60482/g6980/g7087/g9511	13	3	10
Molecular function	GO:0015926	glucosidase activity	19/2180	133/26545	0.0124938	0.11229	g14373/g15600/g19034/g19281/g23169/g23246/g23985/g24659/g25369/g3495/g41626/g42759/g43452/g44130/g4558/g54756/g57404/g59343/g60470	19	6	13
Molecular function	GO:0015116	sulfate transmembrane transporter activity	5/2180	18/26545	0.0128662	0.112451	g13273/g1894/g29833/g39020/g677	5	0	5
Molecular function	GO:0033897	ribonuclease T2 activity	5/2180	18/26545	0.0128662	0.112451	g12240/g17832/g17834/g43189/g49037	5	0	5
Molecular function	GO:0016621	cinnamoyl-CoA reductase activity	4/2180	12/26545	0.0131295	0.112451	g31552/g31556/g47074/g51716	4	0	4
Molecular function	GO:0016707	gibberellin 3-beta-dioxygenase activity	4/2180	12/26545	0.0131295	0.112451	g21145/g21175/g26082/g31427	4	4	0
Molecular function	GO:0015295	solute:proton symporter activity	12/2180	72/26545	0.0138043	0.116855	g11678/g13783/g14387/g14425/g1839/g22941/g59947/g59948/g60482/g6980/g7087/g9511	12	2	10
Molecular function	GO:0008092	cytoskeletal protein binding	51/2180	454/26545	0.0140695	0.117731	g10066/g1080/g13944/g15335/g1542/g16109/g1613/g17369/g178/g192/g23669/g24218/g24246/g24290/g248/g25434/g31333/g31666/g31732/g35790/g38978/g41581/g42030/g42687/g43390/g43652/g43654/g45497/g46347/g49000/g5100/g5138/g54221/g54995/g55215/g56603/g57076/g57082/g58196/g58335/g59712/g59776/g60016/g60133/g60134/g60528/g60589/g847/g916/g9462/g971	51	4	47
Molecular function	GO:0003712	transcription coregulator activity	14/2180	91/26545	0.0162247	0.132031	g13640/g29047/g29758/g31186/g31288/g31615/g35504/g37258/g53114/g53874/g55036/g55166/g60879/g63073	14	0	14
Molecular function	GO:0016892	endoribonuclease activity, producing 3'-phosphomonoesters	5/2180	19/26545	0.0163037	0.132031	g12240/g17832/g17834/g43189/g49037	5	0	5
Molecular function	GO:0015144	carbohydrate transmembrane transporter activity	16/2180	109/26545	0.0163225	0.132031	g11678/g13783/g14387/g14425/g1839/g1840/g22941/g2448/g34438/g41296/g42995/g55355/g60482/g6980/g7087/g9511	16	3	13
Molecular function	GO:0004097	catechol oxidase activity	4/2180	13/26545	0.0177513	0.138956	g13161/g30627/g30628/g43432	4	0	4
Molecular function	GO:0102229	amylopectin maltohydrolase activity	4/2180	13/26545	0.0177513	0.138956	g32506/g38321/g54671/g8183	4	1	3
Molecular function	GO:0102311	8-hydroxygeraniol dehydrogenase activity	4/2180	13/26545	0.0177513	0.138956	g29786/g29796/g29801/g549	4	0	4
Molecular function	GO:0090599	alpha-glucosidase activity	7/2180	34/26545	0.0187156	0.144947	g14373/g15600/g19034/g23246/g25369/g41626/g44130	7	3	4
Molecular function	GO:0052689	carboxylic ester hydrolase activity	36/2180	307/26545	0.0194706	0.149206	g1196/g12280/g1326/g17073/g19797/g19840/g20500/g22836/g26522/g26575/g27905/g28250/g34775/g36364/g37181/g38263/g4095/g4098/g41687/g43130/g4373/g46058/g53515/g5495/g55084/g55144/g57649/g59313/g59699/g60651/g60672/g7747/g808/g811/g812/g9271	36	4	32
Molecular function	GO:0004022	alcohol dehydrogenase (NAD) activity	6/2180	27/26545	0.0200934	0.150807	g42361/g42362/g42370/g42371/g44293/g5225	6	0	6
Molecular function	GO:0009044	xylan 1,4-beta-xylosidase activity	5/2180	20/26545	0.0203009	0.150807	g28030/g4494/g4495/g51055/g59477	5	2	3
Molecular function	GO:0097599	xylanase activity	5/2180	20/26545	0.0203009	0.150807	g28030/g4494/g4495/g51055/g59477	5	2	3
Molecular function	GO:0030599	pectinesterase activity	10/2180	59/26545	0.021005	0.152366	g19797/g19840/g20500/g26522/g27905/g53515/g5495/g55084/g55144/g59313	10	0	10
Molecular function	GO:0045330	aspartyl esterase activity	10/2180	59/26545	0.021005	0.152366	g19797/g19840/g20500/g26522/g27905/g53515/g5495/g55084/g55144/g59313	10	0	10
Molecular function	GO:0008134	transcription factor binding	28/2180	228/26545	0.0211387	0.152366	g10049/g10197/g10520/g13125/g13520/g25699/g25936/g28924/g28993/g29137/g30119/g31138/g33626/g35053/g39254/g397/g41863/g41923/g42011/g47882/g4815/g49022/g52884/g5515/g60377/g63073/g9635/g980	28	12	16
Molecular function	GO:0042626	ATPase activity, coupled to transmembrane movement of substances	33/2180	279/26545	0.0218599	0.15602	g13729/g19792/g19793/g20614/g20615/g25036/g26079/g26605/g26909/g26910/g28351/g31351/g31353/g34263/g38488/g39164/g46727/g46802/g47643/g47651/g51750/g53989/g58077/g59328/g59507/g60691/g60842/g61034/g62131/g62132/g8454/g8613/g9057	33	7	26
Molecular function	GO:0016835	carbon-oxygen lyase activity	31/2180	259/26545	0.0221224	0.15636	g12796/g12915/g13319/g13379/g14015/g23527/g23717/g25110/g25218/g25809/g31168/g34097/g39980/g42721/g43457/g43701/g4601/g46557/g47681/g51010/g51011/g51013/g51014/g54221/g5438/g59315/g59699/g60033/g60492/g61149/g63777	31	2	29
Molecular function	GO:0016836	hydro-lyase activity	18/2180	132/26545	0.0228137	0.159696	g13319/g13379/g23527/g23717/g25110/g34097/g43457/g4601/g46557/g47681/g54221/g5438/g59315/g59699/g60033/g60492/g61149/g63777	18	2	16
Molecular function	GO:0016616	oxidoreductase activity, acting on the CH-OH group of donors, NAD or NADP as acceptor	33/2180	282/26545	0.0250707	0.173264	g13124/g13379/g13914/g14657/g17371/g18031/g19167/g23717/g24724/g29786/g29796/g29798/g29801/g34154/g34943/g38261/g42361/g42362/g42370/g42371/g44293/g47463/g5225/g52271/g54221/g54264/g5438/g54791/g549/g550/g55633/g712/g9838	33	3	30
Molecular function	GO:0046910	pectinesterase inhibitor activity	8/2180	44/26545	0.025228	0.173264	g15633/g20500/g20505/g27905/g53515/g55084/g55144/g59313	8	0	8
Molecular function	GO:0046527	glucosyltransferase activity	39/2180	346/26545	0.0273852	0.186321	g12273/g1369/g14109/g16528/g19777/g20318/g20790/g23481/g24823/g25209/g25553/g29104/g31210/g34155/g37370/g3761/g3785/g38441/g39267/g42073/g42593/g49798/g49927/g53732/g54378/g54657/g54659/g54735/g55056/g56220/g5718/g57510/g58531/g60197/g61227/g63853/g63854/g7816/g9807	39	18	21
Molecular function	GO:0016161	beta-amylase activity	4/2180	15/26545	0.0297109	0.198436	g32506/g38321/g54671/g8183	4	1	3
Molecular function	GO:0033926	glycopeptide alpha-N-acetylgalactosaminidase activity	4/2180	15/26545	0.0297109	0.198436	g19034/g23246/g41626/g44130	4	3	1
Molecular function	GO:0046556	alpha-L-arabinofuranosidase activity	5/2180	22/26545	0.030089	0.199135	g28030/g4494/g4495/g51055/g59477	5	2	3
Molecular function	GO:1901682	sulfur compound transmembrane transporter activity	8/2180	46/26545	0.0321545	0.210887	g13273/g1894/g29833/g39020/g59947/g59948/g62158/g677	8	0	8
Molecular function	GO:0046982	protein heterodimerization activity	22/2180	178/26545	0.0353288	0.229637	g27558/g34250/g34564/g388/g38859/g41755/g41882/g42499/g43286/g4799/g4800/g48140/g4820/g48477/g49791/g59766/g62053/g62054/g62075/g62218/g8967/g9594	22	4	18
Molecular function	GO:0003872	6-phosphofructokinase activity	4/2180	16/26545	0.0371053	0.236953	g21456/g47071/g59365/g61019	4	0	4
Molecular function	GO:0008271	secondary active sulfate transmembrane transporter activity	4/2180	16/26545	0.0371053	0.236953	g13273/g1894/g39020/g677	4	0	4
Molecular function	GO:0030570	pectate lyase activity	6/2180	31/26545	0.0378111	0.239361	g14015/g25218/g31168/g39980/g42721/g43701	6	0	6
Molecular function	GO:0005351	carbohydrate:proton symporter activity	10/2180	65/26545	0.0384708	0.239374	g11678/g13783/g14387/g14425/g1839/g22941/g60482/g6980/g7087/g9511	10	2	8
Molecular function	GO:0005402	carbohydrate:cation symporter activity	10/2180	65/26545	0.0384708	0.239374	g11678/g13783/g14387/g14425/g1839/g22941/g60482/g6980/g7087/g9511	10	2	8
Molecular function	GO:0043492	ATPase activity, coupled to movement of substances	34/2180	304/26545	0.0409783	0.241288	g13729/g17796/g19792/g19793/g20614/g20615/g25036/g26079/g26605/g26909/g26910/g28351/g31351/g31353/g34263/g38488/g39164/g46727/g46802/g47643/g47651/g51750/g53989/g58077/g59328/g59507/g60691/g60842/g61034/g62131/g62132/g8454/g8613/g9057	34	7	27
Molecular function	GO:0042973	glucan endo-1,3-beta-D-glucosidase activity	11/2180	75/26545	0.0419528	0.241288	g19281/g23169/g23985/g24659/g3495/g42759/g43452/g4558/g54756/g59343/g60470	11	3	8
Molecular function	GO:0031418	L-ascorbic acid binding	7/2180	40/26545	0.0423516	0.241288	g13917/g25912/g29435/g30118/g59194/g7702/g8328	7	1	6
Molecular function	GO:0003878	ATP citrate synthase activity	3/2180	10/26545	0.042825	0.241288	g13494/g41656/g50429	3	0	3
Molecular function	GO:0004069	L-aspartate:2-oxoglutarate aminotransferase activity	3/2180	10/26545	0.042825	0.241288	g14228/g54614/g58795	3	0	3
Molecular function	GO:0008889	glycerophosphodiester phosphodiesterase activity	3/2180	10/26545	0.042825	0.241288	g17637/g17649/g64112	3	2	1
Molecular function	GO:0015186	L-glutamine transmembrane transporter activity	3/2180	10/26545	0.042825	0.241288	g20254/g25645/g3657	3	0	3
Molecular function	GO:0016987	sigma factor activity	3/2180	10/26545	0.042825	0.241288	g20638/g8906/g932	3	0	3
Molecular function	GO:0033879	acetylajmaline esterase activity	3/2180	10/26545	0.042825	0.241288	g808/g811/g812	3	0	3
Molecular function	GO:0045543	gibberellin 2-beta-dioxygenase activity	3/2180	10/26545	0.042825	0.241288	g34757/g54334/g5548	3	1	2
Molecular function	GO:0120091	jasmonic acid hydrolase	3/2180	10/26545	0.042825	0.241288	g18043/g20374/g25510	3	0	3
Molecular function	GO:0008810	cellulase activity	6/2180	32/26545	0.0434186	0.241288	g12645/g18508/g19559/g35029/g5496/g61205	6	0	6
Molecular function	GO:0016408	C-acyltransferase activity	6/2180	32/26545	0.0434186	0.241288	g31013/g31014/g5220/g56380/g56381/g56428	6	1	5
Molecular function	GO:0016837	carbon-oxygen lyase activity, acting on polysaccharides	6/2180	32/26545	0.0434186	0.241288	g14015/g25218/g31168/g39980/g42721/g43701	6	0	6
Molecular function	GO:0003993	acid phosphatase activity	9/2180	58/26545	0.0458784	0.251459	g12828/g13415/g25128/g30831/g31370/g31371/g57340/g59764/g62415	9	1	8
Molecular function	GO:0016298	lipase activity	19/2180	153/26545	0.0459395	0.251459	g17073/g210/g26575/g28289/g29438/g31232/g36364/g37181/g4095/g4098/g4373/g46058/g57627/g57631/g57649/g60818/g60950/g62065/g62214	19	4	15
Molecular function	GO:0004659	prenyltransferase activity	7/2180	41/26545	0.0475917	0.258558	g11630/g16874/g29257/g29283/g38646/g61185/g64048	7	1	6
Molecular function	GO:0008146	sulfotransferase activity	10/2180	68/26545	0.0501613	0.263492	g12959/g12969/g13026/g13029/g13033/g30016/g31939/g31940/g31948/g37883	10	5	5
Molecular function	GO:0015405	P-P-bond-hydrolysis-driven transmembrane transporter activity	33/2180	300/26545	0.0526439	0.263492	g13729/g19792/g19793/g20614/g20615/g25036/g26079/g26605/g26909/g26910/g28351/g31351/g31353/g34263/g38488/g39164/g46727/g46802/g47643/g47651/g51750/g53989/g58077/g59328/g59507/g60691/g60842/g61034/g62131/g62132/g8454/g8613/g9057	33	7	26
Molecular function	GO:0015925	galactosidase activity	7/2180	42/26545	0.0532268	0.263492	g14257/g19966/g25193/g42759/g51483/g58517/g60512	7	3	4
Molecular function	GO:0016614	oxidoreductase activity, acting on CH-OH group of donors	37/2180	343/26545	0.0537448	0.263492	g13124/g13379/g13914/g14657/g17371/g18031/g19167/g23717/g24724/g29786/g29796/g29798/g29801/g34154/g34943/g38261/g42361/g42362/g42370/g42371/g44293/g47463/g5225/g52271/g54221/g54264/g5438/g54791/g549/g550/g55229/g5563/g55633/g58554/g712/g8886/g9838	37	5	32
Molecular function	GO:0015399	primary active transmembrane transporter activity	33/2180	301/26545	0.0546507	0.263492	g13729/g19792/g19793/g20614/g20615/g25036/g26079/g26605/g26909/g26910/g28351/g31351/g31353/g34263/g38488/g39164/g46727/g46802/g47643/g47651/g51750/g53989/g58077/g59328/g59507/g60691/g60842/g61034/g62131/g62132/g8454/g8613/g9057	33	7	26
Molecular function	GO:0008443	phosphofructokinase activity	4/2180	18/26545	0.054772	0.263492	g21456/g47071/g59365/g61019	4	0	4
Molecular function	GO:0016157	sucrose synthase activity	4/2180	18/26545	0.054772	0.263492	g14109/g31210/g55056/g5718	4	2	2
Molecular function	GO:0102970	7-deoxyloganetic acid glucosyltransferase activity	4/2180	18/26545	0.054772	0.263492	g20318/g25553/g3761/g3785	4	0	4
Molecular function	GO:0016668	oxidoreductase activity, acting on a sulfur group of donors, NAD(P) as acceptor	8/2180	51/26545	0.0548333	0.263492	g2123/g24994/g47199/g50413/g57569/g9734/g9749/g9759	8	3	5
Molecular function	GO:0008483	transaminase activity	9/2180	60/26545	0.0551105	0.263492	g14228/g18243/g44161/g5071/g54240/g54614/g54963/g58795/g688	9	0	9
Molecular function	GO:0016769	transferase activity, transferring nitrogenous groups	9/2180	60/26545	0.0551105	0.263492	g14228/g18243/g44161/g5071/g54240/g54614/g54963/g58795/g688	9	0	9
Molecular function	GO:0004161	dimethylallyltranstransferase activity	3/2180	11/26545	0.0553768	0.263492	g29257/g29283/g38646	3	0	3
Molecular function	GO:0004356	glutamate-ammonia ligase activity	3/2180	11/26545	0.0553768	0.263492	g29752/g44735/g44770	3	0	3
Molecular function	GO:0010295	(+)-abscisic acid 8'-hydroxylase activity	3/2180	11/26545	0.0553768	0.263492	g14407/g41764/g60684	3	0	3
Molecular function	GO:0016211	ammonia ligase activity	3/2180	11/26545	0.0553768	0.263492	g29752/g44735/g44770	3	0	3
Molecular function	GO:0016880	acid-ammonia (or amide) ligase activity	3/2180	11/26545	0.0553768	0.263492	g29752/g44735/g44770	3	0	3
Molecular function	GO:0046423	allene-oxide cyclase activity	3/2180	11/26545	0.0553768	0.263492	g1386/g23527/g34097	3	0	3
Molecular function	GO:0080118	brassinosteroid sulfotransferase activity	3/2180	11/26545	0.0553768	0.263492	g12969/g13033/g30016	3	1	2
Molecular function	GO:0097027	ubiquitin-protein transferase activator activity	3/2180	11/26545	0.0553768	0.263492	g7593/g849/g850	3	0	3
Molecular function	GO:0016413	O-acetyltransferase activity	13/2180	98/26545	0.0575629	0.266255	g1203/g20388/g20517/g20813/g29991/g30772/g34592/g43027/g49863/g5015/g53985/g59094/g740	13	6	7
Molecular function	GO:0008194	UDP-glycosyltransferase activity	46/2180	442/26545	0.0576337	0.266255	g12273/g1369/g14109/g16196/g17011/g20318/g20790/g21473/g21725/g24823/g24835/g24837/g25209/g25553/g26297/g31210/g34155/g37370/g3761/g3785/g38441/g39267/g42073/g42541/g42593/g43658/g4509/g46497/g49798/g49799/g49927/g50643/g53159/g53732/g54217/g54735/g55056/g5718/g57510/g58531/g60197/g61227/g63853/g63854/g739/g9807	46	21	25
Molecular function	GO:0016620	oxidoreductase activity, acting on the aldehyde or oxo group of donors, NAD or NADP as acceptor	11/2180	79/26545	0.0576368	0.266255	g18387/g19680/g28449/g31552/g31556/g32551/g32562/g38959/g47074/g51716/g59566	11	1	10
Molecular function	GO:0015267	channel activity	26/2180	229/26545	0.0577862	0.266255	g10331/g1277/g1310/g20353/g21204/g25287/g25531/g25653/g3611/g37945/g44188/g44217/g47776/g48011/g4812/g5113/g54255/g54953/g59436/g59817/g61049/g63889/g63893/g8732/g8733/g9516	26	6	20
Molecular function	GO:0022803	passive transmembrane transporter activity	26/2180	229/26545	0.0577862	0.266255	g10331/g1277/g1310/g20353/g21204/g25287/g25531/g25653/g3611/g37945/g44188/g44217/g47776/g48011/g4812/g5113/g54255/g54953/g59436/g59817/g61049/g63889/g63893/g8732/g8733/g9516	26	6	20
Molecular function	GO:0019200	carbohydrate kinase activity	7/2180	44/26545	0.065701	0.30082	g20541/g21456/g42632/g47071/g59365/g59770/g61019	7	0	7
Molecular function	GO:0004656	procollagen-proline 4-dioxygenase activity	3/2180	12/26545	0.0694592	0.303093	g29435/g30118/g7702	3	0	3
Molecular function	GO:0010997	anaphase-promoting complex binding	3/2180	12/26545	0.0694592	0.303093	g7593/g849/g850	3	0	3
Molecular function	GO:0015385	sodium:proton antiporter activity	3/2180	12/26545	0.0694592	0.303093	g54899/g54900/g60783	3	2	1
Molecular function	GO:0016774	phosphotransferase activity, carboxyl group as acceptor	3/2180	12/26545	0.0694592	0.303093	g27075/g61/g63697	3	0	3
Molecular function	GO:0019798	procollagen-proline dioxygenase activity	3/2180	12/26545	0.0694592	0.303093	g29435/g30118/g7702	3	0	3
Molecular function	GO:0031543	peptidyl-proline dioxygenase activity	3/2180	12/26545	0.0694592	0.303093	g29435/g30118/g7702	3	0	3
Molecular function	GO:0031545	peptidyl-proline 4-dioxygenase activity	3/2180	12/26545	0.0694592	0.303093	g29435/g30118/g7702	3	0	3
Molecular function	GO:0015297	antiporter activity	25/2180	223/26545	0.0695283	0.303093	g11681/g11931/g14314/g15879/g16702/g17082/g20549/g24678/g25311/g29182/g29481/g29833/g29842/g36463/g39015/g43645/g4453/g46482/g46485/g50451/g54700/g54899/g54900/g57692/g60783	25	6	19
Molecular function	GO:0031625	ubiquitin protein ligase binding	21/2180	183/26545	0.0745663	0.321209	g24552/g29047/g30350/g32638/g36877/g37858/g37909/g38049/g38898/g4738/g50927/g51430/g53874/g53922/g55796/g58352/g58871/g62062/g62236/g63993/g8732	21	10	11
Molecular function	GO:0044389	ubiquitin-like protein ligase binding	21/2180	183/26545	0.0745663	0.321209	g24552/g29047/g30350/g32638/g36877/g37858/g37909/g38049/g38898/g4738/g50927/g51430/g53874/g53922/g55796/g58352/g58871/g62062/g62236/g63993/g8732	21	10	11
Molecular function	GO:0016831	carboxy-lyase activity	11/2180	83/26545	0.0767765	0.327715	g1206/g23312/g23327/g24467/g25746/g46632/g50321/g50322/g58854/g59114/g60258	11	1	10
Molecular function	GO:0046915	transition metal ion transmembrane transporter activity	9/2180	64/26545	0.0769769	0.327715	g26605/g34297/g39180/g48426/g60042/g61034/g62131/g62132/g7253	9	2	7
Molecular function	GO:0004089	carbonate dehydratase activity	3/2180	13/26545	0.0849716	0.350707	g25110/g60492/g63777	3	1	2
Molecular function	GO:0004420	hydroxymethylglutaryl-CoA reductase (NADPH) activity	3/2180	13/26545	0.0849716	0.350707	g18031/g19167/g9838	3	0	3
Molecular function	GO:0004430	1-phosphatidylinositol 4-kinase activity	3/2180	13/26545	0.0849716	0.350707	g39293/g39296/g58659	3	0	3
Molecular function	GO:0051765	inositol tetrakisphosphate kinase activity	3/2180	13/26545	0.0849716	0.350707	g38366/g51915/g52138	3	2	1
Molecular function	GO:0055106	ubiquitin-protein transferase regulator activity	3/2180	13/26545	0.0849716	0.350707	g7593/g849/g850	3	0	3
Molecular function	GO:0004693	cyclin-dependent protein serine/threonine kinase activity	8/2180	56/26545	0.0857499	0.350707	g24045/g26893/g3310/g47072/g51459/g53482/g58763/g61447	8	0	8
Molecular function	GO:0097472	cyclin-dependent protein kinase activity	8/2180	56/26545	0.0857499	0.350707	g24045/g26893/g3310/g47072/g51459/g53482/g58763/g61447	8	0	8
Molecular function	GO:0061630	ubiquitin protein ligase activity	36/2180	347/26545	0.0872586	0.354884	g1234/g17497/g17869/g19662/g20291/g20647/g218/g23990/g25974/g29565/g29855/g30147/g30350/g30553/g30973/g31036/g31265/g35554/g42063/g42800/g4301/g47620/g49932/g50927/g51123/g57880/g60091/g60217/g60339/g60587/g60940/g724/g727/g7537/g9339/g9953	36	14	22
Molecular function	GO:0140103	catalytic activity, acting on a glycoprotein	4/2180	21/26545	0.0882889	0.35639	g19034/g23246/g41626/g44130	4	3	1
Molecular function	GO:0016679	oxidoreductase activity, acting on diphenols and related substances as donors	12/2180	95/26545	0.0886081	0.35639	g13161/g17903/g25541/g30627/g30628/g37469/g37470/g37937/g42497/g43432/g60700/g8011	12	1	11
Molecular function	GO:0061659	ubiquitin-like protein ligase activity	36/2180	349/26545	0.092744	0.363287	g1234/g17497/g17869/g19662/g20291/g20647/g218/g23990/g25974/g29565/g29855/g30147/g30350/g30553/g30973/g31036/g31265/g35554/g42063/g42800/g4301/g47620/g49932/g50927/g51123/g57880/g60091/g60217/g60339/g60587/g60940/g724/g727/g7537/g9339/g9953	36	14	22
Molecular function	GO:0016814	hydrolase activity, acting on carbon-nitrogen (but not peptide) bonds, in cyclic amidines	5/2180	30/26545	0.0951435	0.363287	g19898/g19973/g23825/g46697/g48971	5	0	5
Molecular function	GO:0004709	MAP kinase kinase kinase activity	7/2180	48/26545	0.0955021	0.363287	g1104/g13325/g29911/g34312/g41861/g748/g9931	7	1	6
Molecular function	GO:0022838	substrate-specific channel activity	22/2180	200/26545	0.0982519	0.363287	g10331/g1277/g21204/g25653/g3611/g37945/g44188/g44217/g47776/g48011/g4812/g5113/g54255/g54953/g59436/g59817/g61049/g63889/g63893/g8732/g8733/g9516	22	6	16
Molecular function	GO:0016682	oxidoreductase activity, acting on diphenols and related substances as donors, oxygen as acceptor	11/2180	87/26545	0.0994924	0.363287	g13161/g17903/g25541/g30627/g30628/g37469/g37470/g42497/g43432/g60700/g8011	11	1	10
Molecular function	GO:0019900	kinase binding	12/2180	97/26545	0.0997856	0.363287	g24574/g2873/g30422/g3310/g34312/g43062/g51459/g5386/g61447/g7593/g849/g850	12	2	10
Molecular function	GO:0004743	pyruvate kinase activity	4/2180	22/26545	0.101222	0.363287	g32874/g50598/g5674/g58124	4	1	3
Molecular function	GO:0030955	potassium ion binding	4/2180	22/26545	0.101222	0.363287	g32874/g50598/g5674/g58124	4	1	3
Molecular function	GO:0031420	alkali metal ion binding	4/2180	22/26545	0.101222	0.363287	g32874/g50598/g5674/g58124	4	1	3
Molecular function	GO:0070696	transmembrane receptor protein serine/threonine kinase binding	4/2180	22/26545	0.101222	0.363287	g34603/g42380/g54916/g61606	4	0	4
Molecular function	GO:0008793	aromatic-amino-acid:2-oxoglutarate aminotransferase activity	3/2180	14/26545	0.1018	0.363287	g14228/g54614/g58795	3	0	3
Molecular function	GO:0009975	cyclase activity	3/2180	14/26545	0.1018	0.363287	g1386/g23527/g34097	3	0	3
Molecular function	GO:0015101	organic cation transmembrane transporter activity	3/2180	14/26545	0.1018	0.363287	g21545/g42460/g61049	3	2	1
Molecular function	GO:0031409	pigment binding	3/2180	14/26545	0.1018	0.363287	g280/g39043/g54350	3	0	3
Molecular function	GO:0070546	L-phenylalanine aminotransferase activity	3/2180	14/26545	0.1018	0.363287	g14228/g54614/g58795	3	0	3
Molecular function	GO:0080130	L-phenylalanine:2-oxoglutarate aminotransferase activity	3/2180	14/26545	0.1018	0.363287	g14228/g54614/g58795	3	0	3
Molecular function	GO:0102485	dATP phosphohydrolase activity	3/2180	14/26545	0.1018	0.363287	g7822/g7833/g7872	3	1	2
Molecular function	GO:0102486	dCTP phosphohydrolase activity	3/2180	14/26545	0.1018	0.363287	g7822/g7833/g7872	3	1	2
Molecular function	GO:0102487	dUTP phosphohydrolase activity	3/2180	14/26545	0.1018	0.363287	g7822/g7833/g7872	3	1	2
Molecular function	GO:0102488	dTTP phosphohydrolase activity	3/2180	14/26545	0.1018	0.363287	g7822/g7833/g7872	3	1	2
Molecular function	GO:0102489	GTP phosphohydrolase activity	3/2180	14/26545	0.1018	0.363287	g7822/g7833/g7872	3	1	2
Molecular function	GO:0102490	8-oxo-dGTP phosphohydrolase activity	3/2180	14/26545	0.1018	0.363287	g7822/g7833/g7872	3	1	2
Molecular function	GO:0102491	dGTP phosphohydrolase activity	3/2180	14/26545	0.1018	0.363287	g7822/g7833/g7872	3	1	2
Molecular function	GO:0016903	oxidoreductase activity, acting on the aldehyde or oxo group of donors	13/2180	108/26545	0.105106	0.373255	g18387/g19680/g24337/g28449/g31552/g31556/g32551/g32562/g38959/g47074/g51716/g59566/g60532	13	2	11
Molecular function	GO:0015179	L-amino acid transmembrane transporter activity	5/2180	31/26545	0.106169	0.375199	g14314/g20254/g25645/g3657/g62308	5	0	5
Molecular function	GO:0008422	beta-glucosidase activity	12/2180	99/26545	0.11177	0.391193	g19281/g23169/g23985/g24659/g3495/g42759/g43452/g4558/g54756/g57404/g59343/g60470	12	3	9
Molecular function	GO:0016782	transferase activity, transferring sulfur-containing groups	12/2180	99/26545	0.11177	0.391193	g12959/g12969/g13026/g13029/g13033/g17260/g29943/g30016/g31939/g31940/g31948/g37883	12	5	7
Molecular function	GO:0008375	acetylglucosaminyltransferase activity	7/2180	50/26545	0.112791	0.392879	g16196/g21473/g21725/g43658/g4509/g46497/g54217	7	3	4
Molecular function	GO:0016209	antioxidant activity	22/2180	204/26545	0.114642	0.396504	g16057/g16805/g16957/g19623/g20424/g20438/g2123/g23482/g23950/g24994/g28561/g28564/g34466/g39643/g47199/g50413/g5393/g57569/g61562/g9734/g9749/g9759	22	4	18
Molecular function	GO:0008519	ammonium transmembrane transporter activity	4/2180	23/26545	0.114969	0.396504	g17995/g42460/g61049/g8186	4	1	3
Molecular function	GO:0016810	hydrolase activity, acting on carbon-nitrogen (but not peptide) bonds	17/2180	152/26545	0.119421	0.396504	g18043/g19898/g19973/g20374/g23825/g24750/g25510/g30831/g34248/g38711/g41063/g41920/g46302/g46697/g48971/g50946/g59563	17	2	15
Molecular function	GO:0038023	signaling receptor activity	46/2180	469/26545	0.119528	0.396504	g12200/g13143/g13146/g14190/g1664/g18118/g19707/g20035/g20281/g22410/g25584/g25719/g25781/g33482/g350/g37388/g37858/g37909/g37945/g39893/g40820/g41992/g423/g42390/g43417/g43569/g43595/g43672/g4522/g4709/g4916/g50316/g54255/g5489/g5501/g55136/g55181/g55239/g58451/g60990/g61781/g62127/g8333/g8401/g9086/g9476	46	13	33
Molecular function	GO:0003995	acyl-CoA dehydrogenase activity	3/2180	15/26545	0.119822	0.396504	g23818/g54581/g55653	3	0	3
Molecular function	GO:0004805	trehalose-phosphatase activity	3/2180	15/26545	0.119822	0.396504	g1767/g42126/g60089	3	0	3
Molecular function	GO:0005199	structural constituent of cell wall	3/2180	15/26545	0.119822	0.396504	g26026/g34533/g39022	3	0	3
Molecular function	GO:0035250	UDP-galactosyltransferase activity	3/2180	15/26545	0.119822	0.396504	g17011/g26297/g42541	3	2	1
Molecular function	GO:0045551	cinnamyl-alcohol dehydrogenase activity	3/2180	15/26545	0.119822	0.396504	g34154/g34943/g712	3	2	1
Molecular function	GO:0052742	phosphatidylinositol kinase activity	3/2180	15/26545	0.119822	0.396504	g39293/g39296/g58659	3	0	3
Molecular function	GO:0052747	sinapyl alcohol dehydrogenase activity	3/2180	15/26545	0.119822	0.396504	g34154/g34943/g712	3	2	1
Molecular function	GO:0051536	iron-sulfur cluster binding	19/2180	174/26545	0.123739	0.405773	g1101/g14249/g14255/g19690/g23959/g26957/g28219/g33531/g33561/g37937/g42489/g47774/g49077/g51100/g54484/g59342/g59680/g6637/g9966	19	2	17
Molecular function	GO:0051540	metal cluster binding	19/2180	174/26545	0.123739	0.405773	g1101/g14249/g14255/g19690/g23959/g26957/g28219/g33531/g33561/g37937/g42489/g47774/g49077/g51100/g54484/g59342/g59680/g6637/g9966	19	2	17
Molecular function	GO:0016407	acetyltransferase activity	21/2180	198/26545	0.136414	0.443541	g1049/g1203/g20388/g20517/g20813/g29047/g29991/g30772/g34592/g35276/g39309/g43027/g49533/g49863/g49978/g5015/g50327/g53874/g53985/g59094/g740	21	8	13
Molecular function	GO:0001085	RNA polymerase II transcription factor binding	6/2180	43/26545	0.137755	0.443541	g10197/g31138/g397/g42011/g47882/g5515	6	2	4
Molecular function	GO:0016846	carbon-sulfur lyase activity	6/2180	43/26545	0.137755	0.443541	g17260/g19369/g19396/g29094/g39368/g57375	6	1	5
Molecular function	GO:0005375	copper ion transmembrane transporter activity	3/2180	16/26545	0.138911	0.443541	g48426/g62131/g62132	3	1	2
Molecular function	GO:0005384	manganese ion transmembrane transporter activity	3/2180	16/26545	0.138911	0.443541	g34297/g60042/g7253	3	0	3
Molecular function	GO:0030976	thiamine pyrophosphate binding	3/2180	16/26545	0.138911	0.443541	g24467/g58854/g59114	3	0	3
Molecular function	GO:0004185	serine-type carboxypeptidase activity	7/2180	53/26545	0.141559	0.450021	g2483/g31123/g34500/g41241/g58637/g59200/g60820	7	1	6
Molecular function	GO:0015205	nucleobase transmembrane transporter activity	5/2180	34/26545	0.142715	0.451723	g37408/g42055/g42056/g42058/g63746	5	4	1
Molecular function	GO:0016713	oxidoreductase activity, acting on paired donors, with incorporation or reduction of molecular oxygen, reduced iron-sulfur protein as one donor, and incorporation of one atom of oxygen	4/2180	25/26545	0.144705	0.452125	g10719/g10724/g40205/g58155	4	0	4
Molecular function	GO:0016833	oxo-acid-lyase activity	4/2180	25/26545	0.144705	0.452125	g25524/g44161/g48726/g50425	4	1	3
Molecular function	GO:0050404	zeatin O-beta-D-xylosyltransferase activity	4/2180	25/26545	0.144705	0.452125	g24823/g24835/g24837/g58531	4	1	3
Molecular function	GO:0000287	magnesium ion binding	21/2180	200/26545	0.146429	0.455558	g12796/g12915/g17637/g17649/g17796/g24467/g32874/g3411/g38366/g47115/g50598/g51010/g51011/g51013/g51014/g5674/g58124/g58558/g58854/g59114/g60033	21	4	17
Molecular function	GO:0004180	carboxypeptidase activity	9/2180	74/26545	0.151644	0.469773	g2483/g30403/g31123/g34500/g41241/g58340/g58637/g59200/g60820	9	1	8
Molecular function	GO:0008081	phosphoric diester hydrolase activity	8/2180	64/26545	0.152427	0.470198	g17637/g17649/g29438/g43247/g57339/g62065/g62214/g64112	8	2	6
Molecular function	GO:0047134	protein-disulfide reductase activity	5/2180	35/26545	0.155963	0.477717	g2123/g24994/g47199/g50413/g57569	5	3	2
Molecular function	GO:0016627	oxidoreductase activity, acting on the CH-CH group of donors	13/2180	116/26545	0.156177	0.477717	g23818/g25309/g26200/g26220/g27271/g34169/g39213/g5000/g53373/g54581/g55653/g58412/g6549	13	1	12
Molecular function	GO:0016634	oxidoreductase activity, acting on the CH-CH group of donors, oxygen as acceptor	3/2180	17/26545	0.158936	0.482107	g39213/g54581/g55653	3	0	3
Molecular function	GO:0030151	molybdenum ion binding	3/2180	17/26545	0.158936	0.482107	g13732/g17260/g29943	3	0	3
Molecular function	GO:0016409	palmitoyltransferase activity	6/2180	45/26545	0.160914	0.484073	g29451/g49853/g56380/g56381/g56428/g58677	6	1	5
Molecular function	GO:0016638	oxidoreductase activity, acting on the CH-NH2 group of donors	6/2180	45/26545	0.160914	0.484073	g13310/g25912/g26957/g58341/g59194/g62593	6	0	6
Molecular function	GO:0004565	beta-galactosidase activity	5/2180	36/26545	0.169694	0.506299	g14257/g19966/g25193/g42759/g60512	5	2	3
Molecular function	GO:0016894	endonuclease activity, active with either ribo- or deoxyribonucleic acids and producing 3'-phosphomonoesters	5/2180	36/26545	0.169694	0.506299	g12240/g17832/g17834/g43189/g49037	5	0	5
Molecular function	GO:0051537	2 iron, 2 sulfur cluster binding	8/2180	66/26545	0.172148	0.511526	g14249/g14255/g28219/g37937/g42489/g47774/g51100/g54484	8	1	7
Molecular function	GO:0016160	amylase activity	4/2180	27/26545	0.177065	0.521875	g32506/g38321/g54671/g8183	4	1	3
Molecular function	GO:0046912	transferase activity, transferring acyl groups, acyl groups converted into alkyl on transfer	4/2180	27/26545	0.177065	0.521875	g11786/g13494/g41656/g50429	4	1	3
Molecular function	GO:0016832	aldehyde-lyase activity	3/2180	18/26545	0.179769	0.52559	g45357/g55229/g58139	3	1	2
Molecular function	GO:0019239	deaminase activity	3/2180	18/26545	0.179769	0.52559	g19898/g19973/g23825	3	0	3
Molecular function	GO:0035251	UDP-glucosyltransferase activity	30/2180	307/26545	0.183313	0.531189	g12273/g1369/g14109/g20318/g20790/g24823/g25209/g25553/g31210/g34155/g37370/g3761/g3785/g38441/g39267/g42073/g42593/g49798/g49927/g53732/g54735/g55056/g5718/g57510/g58531/g60197/g61227/g63853/g63854/g9807	30	14	16
Molecular function	GO:0004791	thioredoxin-disulfide reductase activity	5/2180	37/26545	0.183873	0.531189	g2123/g24994/g47199/g50413/g57569	5	3	2
Molecular function	GO:0005200	structural constituent of cytoskeleton	5/2180	37/26545	0.183873	0.531189	g20583/g38689/g45701/g4973/g9986	5	1	4
Molecular function	GO:0048029	monosaccharide binding	8/2180	68/26545	0.192944	0.541837	g13917/g25912/g29435/g30118/g55591/g59194/g7702/g8328	8	2	6
Molecular function	GO:0015103	inorganic anion transmembrane transporter activity	13/2180	121/26545	0.193601	0.541837	g13115/g13273/g13947/g15581/g15582/g18447/g1894/g21200/g29833/g30168/g39020/g61053/g677	13	2	11
Molecular function	GO:0003933	GTP cyclohydrolase activity	2/2180	10/26545	0.195746	0.541837	g46697/g48971	2	0	2
Molecular function	GO:0004031	aldehyde oxidase activity	2/2180	10/26545	0.195746	0.541837	g24337/g60532	2	1	1
Molecular function	GO:0015114	phosphate ion transmembrane transporter activity	2/2180	10/26545	0.195746	0.541837	g13115/g13947	2	0	2
Molecular function	GO:0016623	oxidoreductase activity, acting on the aldehyde or oxo group of donors, oxygen as acceptor	2/2180	10/26545	0.195746	0.541837	g24337/g60532	2	1	1
Molecular function	GO:0019202	amino acid kinase activity	2/2180	10/26545	0.195746	0.541837	g27075/g63697	2	0	2
Molecular function	GO:0043891	glyceraldehyde-3-phosphate dehydrogenase (NAD(P)+) (phosphorylating) activity	2/2180	10/26545	0.195746	0.541837	g32551/g32562	2	0	2
Molecular function	GO:0047987	hydroperoxide dehydratase activity	2/2180	10/26545	0.195746	0.541837	g23527/g34097	2	0	2
Molecular function	GO:0102797	geranial:oxygen oxidoreductase activity	2/2180	10/26545	0.195746	0.541837	g24337/g60532	2	1	1
Molecular function	GO:0102798	heptaldehyde:oxygen oxidoreductase activity	2/2180	10/26545	0.195746	0.541837	g24337/g60532	2	1	1
Molecular function	GO:0001228	DNA-binding transcription activator activity, RNA polymerase II-specific	9/2180	79/26545	0.198814	0.548246	g10197/g26525/g31138/g397/g42011/g47882/g5515/g57590/g7739	9	3	6
Molecular function	GO:0004806	triglyceride lipase activity	3/2180	19/26545	0.201283	0.552958	g37181/g4373/g57649	3	0	3
Molecular function	GO:0016628	oxidoreductase activity, acting on the CH-CH group of donors, NAD or NADP as acceptor	8/2180	69/26545	0.203717	0.55754	g25309/g26200/g26220/g34169/g5000/g53373/g58412/g6549	8	1	7
Molecular function	GO:0051119	sugar transmembrane transporter activity	9/2180	80/26545	0.208921	0.569641	g11678/g22941/g2448/g42995/g55355/g60482/g6980/g7087/g9511	9	3	6
Molecular function	GO:0010329	auxin efflux transmembrane transporter activity	4/2180	29/26545	0.211578	0.572597	g30543/g46727/g58077/g8865	4	1	3
Molecular function	GO:0015081	sodium ion transmembrane transporter activity	4/2180	29/26545	0.211578	0.572597	g13677/g54899/g54900/g60783	4	3	1
Molecular function	GO:0070008	serine-type exopeptidase activity	7/2180	60/26545	0.220253	0.593868	g2483/g31123/g34500/g41241/g58637/g59200/g60820	7	1	6
Molecular function	GO:0017022	myosin binding	3/2180	20/26545	0.223354	0.600007	g35790/g45497/g58335	3	0	3
Molecular function	GO:0004620	phospholipase activity	12/2180	114/26545	0.225572	0.602963	g17073/g26575/g29438/g36364/g37181/g4095/g4098/g4373/g46058/g60818/g62065/g62214	12	2	10
Molecular function	GO:0008242	omega peptidase activity	2/2180	11/26545	0.226939	0.602963	g38711/g41920	2	0	2
Molecular function	GO:0016647	oxidoreductase activity, acting on the CH-NH group of donors, oxygen as acceptor	2/2180	11/26545	0.226939	0.602963	g24385/g57719	2	1	1
Molecular function	GO:0008353	RNA polymerase II CTD heptapeptide repeat kinase activity	4/2180	30/26545	0.229491	0.605324	g24045/g26893/g47072/g58763	4	0	4
Molecular function	GO:0080161	auxin transmembrane transporter activity	4/2180	30/26545	0.229491	0.605324	g30543/g46727/g58077/g8865	4	1	3
Molecular function	GO:0005509	calcium ion binding	34/2180	363/26545	0.234811	0.61712	g12331/g12354/g12658/g134/g19306/g19623/g23360/g23482/g24446/g24786/g25730/g26575/g26780/g29438/g30871/g34402/g35596/g35666/g36364/g41650/g41885/g41886/g42615/g42791/g42984/g46632/g53218/g57832/g57833/g59977/g60135/g62065/g62214/g62861	34	6	28
Molecular function	GO:0016671	oxidoreductase activity, acting on a sulfur group of donors, disulfide as acceptor	5/2180	41/26545	0.244374	0.630664	g2123/g24994/g37228/g47199/g59342	5	2	3
Molecular function	GO:0019206	nucleoside kinase activity	3/2180	21/26545	0.245865	0.630664	g12899/g53927/g63869	3	1	2
Molecular function	GO:0019840	isoprenoid binding	3/2180	21/26545	0.245865	0.630664	g19566/g5433/g9506	3	0	3
Molecular function	GO:0030545	receptor regulator activity	3/2180	21/26545	0.245865	0.630664	g1019/g25152/g34061	3	2	1
Molecular function	GO:0048018	receptor ligand activity	3/2180	21/26545	0.245865	0.630664	g1019/g25152/g34061	3	2	1
Molecular function	GO:0050734	hydroxycinnamoyltransferase activity	3/2180	21/26545	0.245865	0.630664	g50626/g50761/g54875	3	0	3
Molecular function	GO:0005345	purine nucleobase transmembrane transporter activity	4/2180	31/26545	0.247761	0.630664	g37408/g42055/g42056/g42058	4	4	0
Molecular function	GO:0016168	chlorophyll binding	4/2180	31/26545	0.247761	0.630664	g24312/g280/g39043/g54350	4	0	4
Molecular function	GO:0035252	UDP-xylosyltransferase activity	4/2180	31/26545	0.247761	0.630664	g24823/g24835/g24837/g58531	4	1	3
Molecular function	GO:0000822	inositol hexakisphosphate binding	2/2180	12/26545	0.258435	0.644318	g13115/g13947	2	0	2
Molecular function	GO:0004784	superoxide dismutase activity	2/2180	12/26545	0.258435	0.644318	g20438/g61562	2	0	2
Molecular function	GO:0016721	oxidoreductase activity, acting on superoxide radicals as acceptor	2/2180	12/26545	0.258435	0.644318	g20438/g61562	2	0	2
Molecular function	GO:0016985	mannan endo-1,4-beta-mannosidase activity	2/2180	12/26545	0.258435	0.644318	g29341/g60495	2	0	2
Molecular function	GO:0019139	cytokinin dehydrogenase activity	2/2180	12/26545	0.258435	0.644318	g58554/g8886	2	1	1
Molecular function	GO:0052745	inositol phosphate phosphatase activity	2/2180	12/26545	0.258435	0.644318	g38366/g55559	2	1	1
Molecular function	GO:0015112	nitrate transmembrane transporter activity	5/2180	42/26545	0.260262	0.646657	g15581/g15582/g18447/g30168/g61053	5	2	3
Molecular function	GO:0019203	carbohydrate phosphatase activity	4/2180	32/26545	0.266328	0.65864	g15332/g1767/g42126/g60089	4	0	4
Molecular function	GO:0000156	phosphorelay response regulator activity	3/2180	22/26545	0.268703	0.65864	g24753/g24894/g47182	3	1	2
Molecular function	GO:0015386	potassium:proton antiporter activity	3/2180	22/26545	0.268703	0.65864	g54899/g54900/g60783	3	2	1
Molecular function	GO:0048038	quinone binding	3/2180	22/26545	0.268703	0.65864	g13310/g19548/g5445	3	0	3
Molecular function	GO:0008238	exopeptidase activity	13/2180	130/26545	0.269891	0.65933	g2483/g30403/g31123/g34500/g38711/g41241/g41920/g47115/g47756/g58340/g58637/g59200/g60820	13	1	12
Molecular function	GO:0004364	glutathione transferase activity	10/2180	97/26545	0.273251	0.665307	g16057/g16805/g20966/g24356/g28952/g29615/g43396/g5453/g5455/g9035	10	1	9
Molecular function	GO:0005355	glucose transmembrane transporter activity	6/2180	54/26545	0.281538	0.678674	g11678/g22941/g60482/g6980/g7087/g9511	6	2	4
Molecular function	GO:0015149	hexose transmembrane transporter activity	6/2180	54/26545	0.281538	0.678674	g11678/g22941/g60482/g6980/g7087/g9511	6	2	4
Molecular function	GO:0033612	receptor serine/threonine kinase binding	6/2180	54/26545	0.281538	0.678674	g26328/g34603/g41709/g42380/g54916/g61606	6	0	6
Molecular function	GO:0005102	signaling receptor binding	9/2180	87/26545	0.284709	0.680781	g1019/g25152/g26328/g34061/g34603/g41709/g42380/g54916/g61606	9	2	7
Molecular function	GO:0003997	acyl-CoA oxidase activity	2/2180	13/26545	0.289974	0.680781	g54581/g55653	2	0	2
Molecular function	GO:0005381	iron ion transmembrane transporter activity	2/2180	13/26545	0.289974	0.680781	g34297/g60042	2	0	2
Molecular function	GO:0102867	molybdenum cofactor sulfurtransferase activity	2/2180	13/26545	0.289974	0.680781	g17260/g29943	2	0	2
Molecular function	GO:0005451	monovalent cation:proton antiporter activity	3/2180	23/26545	0.291763	0.680781	g54899/g54900/g60783	3	2	1
Molecular function	GO:0015140	malate transmembrane transporter activity	3/2180	23/26545	0.291763	0.680781	g11681/g29833/g59385	3	0	3
Molecular function	GO:0016861	intramolecular oxidoreductase activity, interconverting aldoses and ketoses	3/2180	23/26545	0.291763	0.680781	g39707/g39788/g56269	3	0	3
Molecular function	GO:0032451	demethylase activity	3/2180	23/26545	0.291763	0.680781	g13668/g29901/g38373	3	0	3
Molecular function	GO:0102303	resveratrol 3,5-O-dimethyltransferase activity	3/2180	23/26545	0.291763	0.680781	g54560/g54579/g63382	3	0	3
Molecular function	GO:1990135	flavonoid sulfotransferase activity	3/2180	23/26545	0.291763	0.680781	g12969/g13033/g37883	3	1	2
Molecular function	GO:0019199	transmembrane receptor protein kinase activity	31/2180	341/26545	0.303065	0.704892	g12200/g14190/g1664/g18118/g19707/g20035/g20281/g22410/g25781/g33482/g350/g37388/g37858/g37909/g39893/g40820/g41992/g42390/g43569/g43595/g4522/g4709/g4916/g50316/g55181/g55239/g58451/g60990/g61781/g62127/g9086	31	8	23
Molecular function	GO:0015562	efflux transmembrane transporter activity	4/2180	34/26545	0.304124	0.705103	g30543/g46727/g58077/g8865	4	1	3
Molecular function	GO:0008378	galactosyltransferase activity	6/2180	56/26545	0.31083	0.71609	g1074/g136/g17011/g26297/g30167/g42541	6	2	4
Molecular function	GO:0015145	monosaccharide transmembrane transporter activity	6/2180	56/26545	0.31083	0.71609	g11678/g22941/g60482/g6980/g7087/g9511	6	2	4
Molecular function	GO:0015556	C4-dicarboxylate transmembrane transporter activity	3/2180	24/26545	0.314947	0.723284	g11681/g29833/g59385	3	0	3
Molecular function	GO:0004321	fatty-acyl-CoA synthase activity	2/2180	14/26545	0.321336	0.73104	g31013/g31014	2	0	2
Molecular function	GO:0004396	hexokinase activity	2/2180	14/26545	0.321336	0.73104	g20541/g42632	2	0	2
Molecular function	GO:0008265	Mo-molybdopterin cofactor sulfurase activity	2/2180	14/26545	0.321336	0.73104	g17260/g29943	2	0	2
Molecular function	GO:0008028	monocarboxylic acid transmembrane transporter activity	5/2180	46/26545	0.325763	0.738803	g34263/g34438/g36463/g42460/g59507	5	2	3
Molecular function	GO:0050403	trans-zeatin O-beta-D-glucosyltransferase activity	3/2180	25/26545	0.338161	0.764539	g24823/g25209/g58531	3	1	2
Molecular function	GO:0008374	O-acyltransferase activity	19/2180	208/26545	0.348407	0.779643	g1203/g17073/g20388/g20517/g20813/g23869/g29991/g30772/g34394/g34592/g38766/g43027/g43255/g49863/g5015/g53985/g58886/g59094/g740	19	8	11
Molecular function	GO:0001653	peptide receptor activity	2/2180	15/26545	0.352339	0.779643	g41992/g55136	2	0	2
Molecular function	GO:0003950	NAD+ ADP-ribosyltransferase activity	2/2180	15/26545	0.352339	0.779643	g33775/g59911	2	1	1
Molecular function	GO:0004567	beta-mannosidase activity	2/2180	15/26545	0.352339	0.779643	g29341/g60495	2	0	2
Molecular function	GO:0008235	metalloexopeptidase activity	2/2180	15/26545	0.352339	0.779643	g47115/g58340	2	0	2
Molecular function	GO:0030674	protein binding, bridging	2/2180	15/26545	0.352339	0.779643	g30909/g30927	2	0	2
Molecular function	GO:0047213	anthocyanidin 3-O-glucosyltransferase activity	2/2180	15/26545	0.352339	0.779643	g1369/g9807	2	2	0
Molecular function	GO:0016860	intramolecular oxidoreductase activity	11/2180	116/26545	0.355142	0.783466	g1386/g23527/g34097/g37228/g39707/g39788/g54221/g56269/g58345/g60543/g752	11	1	10
Molecular function	GO:0016417	S-acyltransferase activity	5/2180	48/26545	0.359187	0.789995	g29451/g49533/g49853/g49978/g58677	5	1	4
Molecular function	GO:0005315	inorganic phosphate transmembrane transporter activity	3/2180	26/26545	0.361324	0.790644	g34438/g5297/g58894	3	0	3
Molecular function	GO:1901681	sulfur compound binding	4/2180	37/26545	0.361655	0.790644	g17180/g24467/g58854/g59114	4	1	3
Molecular function	GO:0016651	oxidoreductase activity, acting on NAD(P)H	11/2180	117/26545	0.365777	0.797261	g19623/g2123/g23482/g24994/g26717/g47199/g50413/g57569/g9734/g9749/g9759	11	3	8
Molecular function	GO:0010181	FMN binding	5/2180	49/26545	0.37595	0.816989	g26200/g26220/g26717/g26957/g58412	5	0	5
Molecular function	GO:0050660	flavin adenine dinucleotide binding	15/2180	165/26545	0.379727	0.817299	g23818/g26957/g34943/g50580/g53373/g54581/g55229/g5563/g55653/g57719/g58554/g59572/g8886/g9155/g9174	15	4	11
Molecular function	GO:0003905	alkylbase DNA N-glycosylase activity	2/2180	16/26545	0.382828	0.817299	g31549/g39705	2	1	1
Molecular function	GO:0008725	DNA-3-methyladenine glycosylase activity	2/2180	16/26545	0.382828	0.817299	g31549/g39705	2	1	1
Molecular function	GO:0019238	cyclohydrolase activity	2/2180	16/26545	0.382828	0.817299	g46697/g48971	2	0	2
Molecular function	GO:0043733	DNA-3-methylbase glycosylase activity	2/2180	16/26545	0.382828	0.817299	g31549/g39705	2	1	1
Molecular function	GO:0047372	acylglycerol lipase activity	2/2180	16/26545	0.382828	0.817299	g4095/g4098	2	0	2
Molecular function	GO:0015095	magnesium ion transmembrane transporter activity	3/2180	27/26545	0.384356	0.817912	g43731/g46586/g47736	3	2	1
Molecular function	GO:0051539	4 iron, 4 sulfur cluster binding	8/2180	84/26545	0.385363	0.817912	g1101/g23959/g33531/g33561/g49077/g59342/g59680/g9966	8	1	7
Molecular function	GO:0004888	transmembrane signaling receptor activity	35/2180	403/26545	0.389885	0.825106	g12200/g14190/g1664/g18118/g19707/g20035/g20281/g22410/g25781/g33482/g350/g37388/g37858/g37909/g37945/g39893/g40820/g41992/g423/g42390/g43569/g43595/g4522/g4709/g4916/g50316/g54255/g55136/g55181/g55239/g58451/g60990/g61781/g62127/g9086	35	11	24
Molecular function	GO:0004675	transmembrane receptor protein serine/threonine kinase activity	26/2180	297/26545	0.396298	0.834355	g12200/g14190/g1664/g18118/g19707/g20035/g20281/g22410/g25781/g350/g37388/g37858/g37909/g40820/g42390/g43569/g43595/g4522/g4709/g4916/g50316/g55181/g55239/g58451/g60990/g9086	26	4	22
Molecular function	GO:0016759	cellulose synthase activity	4/2180	39/26545	0.399986	0.834355	g20790/g39267/g49798/g54735	4	2	2
Molecular function	GO:0016760	cellulose synthase (UDP-forming) activity	4/2180	39/26545	0.399986	0.834355	g20790/g39267/g49798/g54735	4	2	2
Molecular function	GO:0042285	xylosyltransferase activity	4/2180	39/26545	0.399986	0.834355	g24823/g24835/g24837/g58531	4	1	3
Molecular function	GO:0052793	pectin acetylesterase activity	4/2180	39/26545	0.399986	0.834355	g22836/g41687/g60651/g60672	4	0	4
Molecular function	GO:0005507	copper ion binding	15/2180	168/26545	0.406946	0.839194	g13310/g17903/g25368/g25541/g38044/g39164/g43432/g45357/g46551/g50146/g51154/g54614/g58139/g58795/g63869	15	1	14
Molecular function	GO:0004630	phospholipase D activity	3/2180	28/26545	0.407189	0.839194	g29438/g62065/g62214	3	0	3
Molecular function	GO:0070290	N-acylphosphatidylethanolamine-specific phospholipase D activity	3/2180	28/26545	0.407189	0.839194	g29438/g62065/g62214	3	0	3
Molecular function	GO:0019205	nucleobase-containing compound kinase activity	5/2180	51/26545	0.40942	0.839194	g12899/g30211/g53927/g57284/g63869	5	2	3
Molecular function	GO:0004748	ribonucleoside-diphosphate reductase activity, thioredoxin disulfide as acceptor	2/2180	17/26545	0.412681	0.839194	g54068/g64070	2	0	2
Molecular function	GO:0005544	calcium-dependent phospholipid binding	2/2180	17/26545	0.412681	0.839194	g57832/g57833	2	0	2
Molecular function	GO:0015172	acidic amino acid transmembrane transporter activity	2/2180	17/26545	0.412681	0.839194	g34192/g41989	2	0	2
Molecular function	GO:0016728	oxidoreductase activity, acting on CH or CH2 groups, disulfide as acceptor	2/2180	17/26545	0.412681	0.839194	g54068/g64070	2	0	2
Molecular function	GO:0061731	ribonucleoside-diphosphate reductase activity	2/2180	17/26545	0.412681	0.839194	g54068/g64070	2	0	2
Molecular function	GO:0003756	protein disulfide isomerase activity	4/2180	40/26545	0.419012	0.847335	g37228/g58345/g60543/g752	4	1	3
Molecular function	GO:0016864	intramolecular oxidoreductase activity, transposing S-S bonds	4/2180	40/26545	0.419012	0.847335	g37228/g58345/g60543/g752	4	1	3
Molecular function	GO:0022821	potassium ion antiporter activity	3/2180	29/26545	0.429759	0.866661	g54899/g54900/g60783	3	2	1
Molecular function	GO:0016645	oxidoreductase activity, acting on the CH-NH group of donors	4/2180	41/26545	0.437892	0.880622	g24385/g57719/g58554/g8886	4	2	2
Molecular function	GO:0004535	poly(A)-specific ribonuclease activity	2/2180	18/26545	0.441794	0.886023	g4532/g9975	2	1	1
Molecular function	GO:0016878	acid-thiol ligase activity	3/2180	30/26545	0.452011	0.901546	g27170/g51902/g5538	3	1	2
Molecular function	GO:0043178	alcohol binding	3/2180	30/26545	0.452011	0.901546	g13115/g13947/g19566	3	0	3
Molecular function	GO:0071949	FAD binding	4/2180	42/26545	0.45659	0.90819	g50580/g53373/g54581/g55653	4	1	3
Molecular function	GO:0016838	carbon-oxygen lyase activity, acting on phosphates	7/2180	78/26545	0.46138	0.915217	g12796/g12915/g25809/g51010/g51011/g51013/g51014	7	0	7
Molecular function	GO:0002161	aminoacyl-tRNA editing activity	2/2180	19/26545	0.47009	0.922441	g12280/g38263	2	0	2
Molecular function	GO:0016615	malate dehydrogenase activity	2/2180	19/26545	0.47009	0.922441	g13124/g54264	2	0	2
Molecular function	GO:0050145	nucleoside monophosphate kinase activity	2/2180	19/26545	0.47009	0.922441	g30211/g57284	2	1	1
Molecular function	GO:0102483	scopolin beta-glucosidase activity	2/2180	19/26545	0.47009	0.922441	g42759/g57404	2	1	1
Molecular function	GO:0001046	core promoter sequence-specific DNA binding	3/2180	31/26545	0.473895	0.926951	g26525/g57590/g7739	3	1	2
Molecular function	GO:0019901	protein kinase binding	7/2180	79/26545	0.474935	0.926951	g24574/g2873/g30422/g3310/g51459/g5386/g61447	7	1	6
Molecular function	GO:0005516	calmodulin binding	40/2180	481/26545	0.491128	0.950613	g1277/g13127/g24552/g24710/g27623/g29047/g30946/g31333/g34455/g34457/g37673/g38427/g38430/g38789/g38802/g38809/g38896/g38898/g38907/g38933/g41910/g46347/g46386/g50321/g50322/g51126/g53874/g54108/g54967/g55215/g58667/g59257/g60387/g61086/g61092/g61094/g62062/g62236/g8454/g916	40	25	15
Molecular function	GO:0001047	core promoter binding	3/2180	32/26545	0.495368	0.950613	g26525/g57590/g7739	3	1	2
Molecular function	GO:0016405	CoA-ligase activity	3/2180	32/26545	0.495368	0.950613	g27170/g51902/g5538	3	1	2
Molecular function	GO:0016641	oxidoreductase activity, acting on the CH-NH2 group of donors, oxygen as acceptor	3/2180	32/26545	0.495368	0.950613	g13310/g25912/g59194	3	0	3
Molecular function	GO:0004030	aldehyde dehydrogenase [NAD(P)+] activity	2/2180	20/26545	0.497505	0.950613	g19680/g28449	2	1	1
Molecular function	GO:0004499	N,N-dimethylaniline monooxygenase activity	2/2180	20/26545	0.497505	0.950613	g9155/g9174	2	0	2
Molecular function	GO:0072341	modified amino acid binding	2/2180	20/26545	0.497505	0.950613	g44452/g44501	2	0	2
Molecular function	GO:0080054	low-affinity nitrate transmembrane transporter activity	2/2180	20/26545	0.497505	0.950613	g18447/g61053	2	1	1
Molecular function	GO:0003887	DNA-directed DNA polymerase activity	5/2180	57/26545	0.507433	0.967045	g1101/g34691/g43285/g48089/g49077	5	2	3
Molecular function	GO:0016776	phosphotransferase activity, phosphate group as acceptor	3/2180	33/26545	0.516391	0.978991	g30211/g57284/g60737	3	1	2
Molecular function	GO:0047262	polygalacturonate 4-alpha-galacturonosyltransferase activity	3/2180	33/26545	0.516391	0.978991	g49799/g50643/g53159	3	2	1
Molecular function	GO:0010333	terpene synthase activity	6/2180	70/26545	0.518679	0.980775	g12796/g12915/g51010/g51011/g51013/g51014	6	0	6
Molecular function	GO:0047893	flavonol 3-O-glucosyltransferase activity	2/2180	21/26545	0.523993	0.983163	g12273/g42593	2	2	0
Molecular function	GO:0102360	daphnetin 3-O-glucosyltransferase activity	2/2180	21/26545	0.523993	0.983163	g12273/g42593	2	2	0
Molecular function	GO:0102425	myricetin 3-O-glucosyltransferase activity	2/2180	21/26545	0.523993	0.983163	g12273/g42593	2	2	0
Molecular function	GO:0005310	dicarboxylic acid transmembrane transporter activity	3/2180	34/26545	0.536933	1	g11681/g29833/g59385	3	0	3
Molecular function	GO:0008970	phospholipase A1 activity	3/2180	34/26545	0.536933	1	g37181/g4373/g46058	3	0	3
Molecular function	GO:0009881	photoreceptor activity	4/2180	47/26545	0.546292	1	g25584/g43672/g5489/g9476	4	2	2
Molecular function	GO:0004860	protein kinase inhibitor activity	2/2180	22/26545	0.549522	1	g41882/g50907	2	0	2
Molecular function	GO:0051185	coenzyme transmembrane transporter activity	2/2180	22/26545	0.549522	1	g21545/g62158	2	1	1
Molecular function	GO:0060090	molecular adaptor activity	2/2180	22/26545	0.549522	1	g30909/g30927	2	0	2
Molecular function	GO:0008289	lipid binding	29/2180	358/26545	0.559149	1	g11613/g12499/g13384/g13385/g17111/g17180/g185/g19566/g20839/g21103/g21128/g26294/g33085/g34284/g44321/g50306/g53797/g5433/g55198/g57005/g57832/g57833/g606/g634/g7134/g7950/g7958/g7995/g9506	29	3	26
Molecular function	GO:0080043	quercetin 3-O-glucosyltransferase activity	8/2180	98/26545	0.560276	1	g12273/g25209/g38441/g49927/g53732/g61227/g63853/g63854	8	3	5
Molecular function	GO:0080044	quercetin 7-O-glucosyltransferase activity	8/2180	98/26545	0.560276	1	g12273/g25209/g38441/g49927/g53732/g61227/g63853/g63854	8	3	5
Molecular function	GO:1901505	carbohydrate derivative transmembrane transporter activity	6/2180	73/26545	0.560632	1	g21545/g34438/g57893/g59245/g59947/g59948	6	3	3
Molecular function	GO:0004144	diacylglycerol O-acyltransferase activity	2/2180	23/26545	0.574071	1	g23869/g43255	2	0	2
Molecular function	GO:0019210	kinase inhibitor activity	2/2180	23/26545	0.574071	1	g41882/g50907	2	0	2
Molecular function	GO:0003918	DNA topoisomerase type II (ATP-hydrolyzing) activity	1/2180	10/26545	0.575604	1	g57703	1	0	1
Molecular function	GO:0004645	phosphorylase activity	1/2180	10/26545	0.575604	1	g46258	1	0	1
Molecular function	GO:0005460	UDP-glucose transmembrane transporter activity	1/2180	10/26545	0.575604	1	g57893	1	1	0
Molecular function	GO:0015217	ADP transmembrane transporter activity	1/2180	10/26545	0.575604	1	g21545	1	1	0
Molecular function	GO:0016208	AMP binding	1/2180	10/26545	0.575604	1	g58912	1	0	1
Molecular function	GO:0016730	oxidoreductase activity, acting on iron-sulfur proteins as donors	1/2180	10/26545	0.575604	1	g47774	1	0	1
Molecular function	GO:0016872	intramolecular lyase activity	1/2180	10/26545	0.575604	1	g16744	1	0	1
Molecular function	GO:0033764	steroid dehydrogenase activity, acting on the CH-OH group of donors, NAD or NADP as acceptor	1/2180	10/26545	0.575604	1	g14657	1	0	1
Molecular function	GO:0052593	tryptamine:oxygen oxidoreductase (deaminating) activity	1/2180	10/26545	0.575604	1	g13310	1	0	1
Molecular function	GO:0052594	aminoacetone:oxygen oxidoreductase(deaminating) activity	1/2180	10/26545	0.575604	1	g13310	1	0	1
Molecular function	GO:0052595	aliphatic-amine oxidase activity	1/2180	10/26545	0.575604	1	g13310	1	0	1
Molecular function	GO:0052596	phenethylamine:oxygen oxidoreductase (deaminating) activity	1/2180	10/26545	0.575604	1	g13310	1	0	1
Molecular function	GO:0052638	indole-3-butyrate beta-glucosyltransferase activity	1/2180	10/26545	0.575604	1	g38441	1	0	1
Molecular function	GO:0061505	DNA topoisomerase II activity	1/2180	10/26545	0.575604	1	g57703	1	0	1
Molecular function	GO:0102391	decanoate-CoA ligase activity	1/2180	10/26545	0.575604	1	g5538	1	1	0
Molecular function	GO:0003680	AT DNA binding	3/2180	36/26545	0.576469	1	g25720/g42035/g60234	3	2	1
Molecular function	GO:0016790	thiolester hydrolase activity	3/2180	36/26545	0.576469	1	g25427/g5181/g60818	3	2	1
Molecular function	GO:0004312	fatty acid synthase activity	4/2180	49/26545	0.579955	1	g14607/g17270/g24724/g5181	4	1	3
Molecular function	GO:0016763	transferase activity, transferring pentosyl groups	8/2180	100/26545	0.583676	1	g12899/g24823/g24835/g24837/g33775/g53927/g58531/g59911	8	3	5
Molecular function	GO:0015491	cation:cation antiporter activity	3/2180	37/26545	0.595424	1	g54899/g54900/g60783	3	2	1
Molecular function	GO:0019706	protein-cysteine S-palmitoyltransferase activity	3/2180	37/26545	0.595424	1	g29451/g49853/g58677	3	1	2
Molecular function	GO:0019707	protein-cysteine S-acyltransferase activity	3/2180	37/26545	0.595424	1	g29451/g49853/g58677	3	1	2
Molecular function	GO:0005319	lipid transporter activity	4/2180	50/26545	0.596238	1	g17796/g34263/g51131/g59507	4	0	4
Molecular function	GO:0004714	transmembrane receptor protein tyrosine kinase activity	2/2180	24/26545	0.597628	1	g33482/g41992	2	1	1
Molecular function	GO:0005385	zinc ion transmembrane transporter activity	2/2180	24/26545	0.597628	1	g26605/g39180	2	1	1
Molecular function	GO:0016725	oxidoreductase activity, acting on CH or CH2 groups	2/2180	24/26545	0.597628	1	g54068/g64070	2	0	2
Molecular function	GO:0072509	divalent inorganic cation transmembrane transporter activity	2/2180	24/26545	0.597628	1	g26605/g39180	2	1	1
Molecular function	GO:0003886	DNA (cytosine-5-)-methyltransferase activity	1/2180	11/26545	0.610471	1	g32681	1	0	1
Molecular function	GO:0003978	UDP-glucose 4-epimerase activity	1/2180	11/26545	0.610471	1	g39116	1	1	0
Molecular function	GO:0004017	adenylate kinase activity	1/2180	11/26545	0.610471	1	g30211	1	1	0
Molecular function	GO:0004826	phenylalanine-tRNA ligase activity	1/2180	11/26545	0.610471	1	g61293	1	0	1
Molecular function	GO:0005092	GDP-dissociation inhibitor activity	1/2180	11/26545	0.610471	1	g186	1	0	1
Molecular function	GO:0008878	glucose-1-phosphate adenylyltransferase activity	1/2180	11/26545	0.610471	1	g55556	1	0	1
Molecular function	GO:0009922	fatty acid elongase activity	1/2180	11/26545	0.610471	1	g17270	1	0	1
Molecular function	GO:0018812	3-hydroxyacyl-CoA dehydratase activity	1/2180	11/26545	0.610471	1	g54221	1	0	1
Molecular function	GO:0032454	histone demethylase activity (H3-K9 specific)	1/2180	11/26545	0.610471	1	g38373	1	0	1
Molecular function	GO:0034485	phosphatidylinositol-3,4,5-trisphosphate 5-phosphatase activity	1/2180	11/26545	0.610471	1	g60160	1	0	1
Molecular function	GO:0090482	vitamin transmembrane transporter activity	1/2180	11/26545	0.610471	1	g42460	1	1	0
Molecular function	GO:0046873	metal ion transmembrane transporter activity	27/2180	346/26545	0.638385	1	g1277/g13677/g21204/g25454/g26605/g34297/g37945/g39180/g43731/g46586/g47736/g48426/g5113/g5340/g54255/g54899/g54900/g57692/g59436/g59547/g60042/g60783/g61034/g62131/g62132/g7253/g8454	27	13	14
Molecular function	GO:0045735	nutrient reservoir activity	7/2180	92/26545	0.638809	1	g44667/g46677/g46679/g46886/g5396/g61562/g63147	7	0	7
Molecular function	GO:0004467	long-chain fatty acid-CoA ligase activity	1/2180	12/26545	0.642474	1	g5538	1	1	0
Molecular function	GO:0004616	phosphogluconate dehydrogenase (decarboxylating) activity	1/2180	12/26545	0.642474	1	g47463	1	0	1
Molecular function	GO:0008252	nucleotidase activity	1/2180	12/26545	0.642474	1	g59217	1	0	1
Molecular function	GO:0009008	DNA-methyltransferase activity	1/2180	12/26545	0.642474	1	g32681	1	0	1
Molecular function	GO:0015645	fatty acid ligase activity	1/2180	12/26545	0.642474	1	g5538	1	1	0
Molecular function	GO:0031956	medium-chain fatty acid-CoA ligase activity	1/2180	12/26545	0.642474	1	g5538	1	1	0
Molecular function	GO:0047501	(+)-neomenthol dehydrogenase activity	1/2180	12/26545	0.642474	1	g13914	1	0	1
Molecular function	GO:0090447	glycerol-3-phosphate 2-O-acyltransferase activity	1/2180	12/26545	0.642474	1	g58886	1	1	0
Molecular function	GO:0004601	peroxidase activity	11/2180	144/26545	0.643294	1	g16057/g16957/g19623/g20424/g23482/g23950/g28561/g28564/g34466/g39643/g5393	11	1	10
Molecular function	GO:0015020	glucuronosyltransferase activity	3/2180	40/26545	0.648874	1	g43658/g54217/g739	3	0	3
Molecular function	GO:0016857	racemase and epimerase activity, acting on carbohydrates and derivatives	3/2180	40/26545	0.648874	1	g26682/g39116/g9195	3	2	1
Molecular function	GO:0019887	protein kinase regulator activity	5/2180	67/26545	0.6532	1	g31713/g41882/g4704/g50907/g6355	5	1	4
Molecular function	GO:0016877	ligase activity, forming carbon-sulfur bonds	4/2180	54/26545	0.657441	1	g27170/g43081/g51902/g5538	4	1	3
Molecular function	GO:0099516	ion antiporter activity	4/2180	54/26545	0.657441	1	g11681/g54899/g54900/g60783	4	2	2
Molecular function	GO:0015078	proton transmembrane transporter activity	16/2180	210/26545	0.659841	1	g11678/g13783/g14387/g14425/g1839/g22941/g54899/g54900/g59328/g59947/g59948/g60482/g60783/g6980/g7087/g9511	16	4	12
Molecular function	GO:0016783	sulfurtransferase activity	2/2180	27/26545	0.662355	1	g17260/g29943	2	0	2
Molecular function	GO:0008080	N-acetyltransferase activity	6/2180	81/26545	0.66299	1	g1049/g29047/g35276/g39309/g50327/g53874	6	2	4
Molecular function	GO:0000095	S-adenosyl-L-methionine transmembrane transporter activity	1/2180	13/26545	0.671849	1	g62158	1	0	1
Molecular function	GO:0005337	nucleoside transmembrane transporter activity	1/2180	13/26545	0.671849	1	g59245	1	1	0
Molecular function	GO:0008802	betaine-aldehyde dehydrogenase activity	1/2180	13/26545	0.671849	1	g28449	1	1	0
Molecular function	GO:0034004	germacradienol synthase activity	1/2180	13/26545	0.671849	1	g12915	1	0	1
Molecular function	GO:0052577	germacrene-D synthase activity	1/2180	13/26545	0.671849	1	g12915	1	0	1
Molecular function	GO:0019207	kinase regulator activity	5/2180	69/26545	0.678805	1	g31713/g41882/g4704/g50907/g6355	5	1	4
Molecular function	GO:0008047	enzyme activator activity	9/2180	122/26545	0.679615	1	g17111/g186/g2123/g31713/g32212/g33531/g33561/g58189/g6355	9	3	6
Molecular function	GO:0019888	protein phosphatase regulator activity	3/2180	42/26545	0.681603	1	g19566/g31167/g55001	3	2	1
Molecular function	GO:0042162	telomeric DNA binding	2/2180	28/26545	0.681983	1	g4930/g59605	2	0	2
Molecular function	GO:0044390	ubiquitin-like protein conjugating enzyme binding	2/2180	28/26545	0.681983	1	g4301/g59165	2	1	1
Molecular function	GO:0050636	vinorine synthase activity	2/2180	28/26545	0.681983	1	g30998/g61394	2	0	2
Molecular function	GO:0019208	phosphatase regulator activity	3/2180	43/26545	0.697093	1	g19566/g31167/g55001	3	2	1
Molecular function	GO:0000062	fatty-acyl-CoA binding	1/2180	14/26545	0.698812	1	g17180	1	1	0
Molecular function	GO:0000978	RNA polymerase II proximal promoter sequence-specific DNA binding	1/2180	14/26545	0.698812	1	g13583	1	0	1
Molecular function	GO:0008131	primary amine oxidase activity	1/2180	14/26545	0.698812	1	g13310	1	0	1
Molecular function	GO:0034594	phosphatidylinositol trisphosphate phosphatase activity	1/2180	14/26545	0.698812	1	g60160	1	0	1
Molecular function	GO:0035671	enone reductase activity	1/2180	14/26545	0.698812	1	g34169	1	0	1
Molecular function	GO:0047196	long-chain-alcohol O-fatty-acyltransferase activity	1/2180	14/26545	0.698812	1	g43255	1	0	1
Molecular function	GO:0047429	nucleoside-triphosphate diphosphatase activity	1/2180	14/26545	0.698812	1	g58558	1	0	1
Molecular function	GO:0050308	sugar-phosphatase activity	1/2180	14/26545	0.698812	1	g15332	1	0	1
Molecular function	GO:0102966	arachidoyl-CoA:1-dodecanol O-acyltransferase activity	1/2180	14/26545	0.698812	1	g43255	1	0	1
Molecular function	GO:0103095	wax ester synthase activity	1/2180	14/26545	0.698812	1	g43255	1	0	1
Molecular function	GO:1901567	fatty acid derivative binding	1/2180	14/26545	0.698812	1	g17180	1	1	0
Molecular function	GO:0008327	methyl-CpG binding	2/2180	29/26545	0.700666	1	g17497/g64138	2	0	2
Molecular function	GO:0016684	oxidoreductase activity, acting on peroxide as acceptor	11/2180	151/26545	0.704096	1	g16057/g16957/g19623/g20424/g23482/g23950/g28561/g28564/g34466/g39643/g5393	11	1	10
Molecular function	GO:0030983	mismatched DNA binding	2/2180	30/26545	0.718427	1	g33985/g5464	2	2	0
Molecular function	GO:0051184	cofactor transmembrane transporter activity	2/2180	30/26545	0.718427	1	g21545/g62158	2	1	1
Molecular function	GO:0016289	CoA hydrolase activity	1/2180	15/26545	0.72356	1	g60818	1	1	0
Molecular function	GO:0000175	3'-5'-exoribonuclease activity	2/2180	31/26545	0.735291	1	g4532/g9975	2	1	1
Molecular function	GO:0000987	proximal promoter sequence-specific DNA binding	2/2180	31/26545	0.735291	1	g13583/g38640	2	1	1
Molecular function	GO:0015923	mannosidase activity	2/2180	31/26545	0.735291	1	g29341/g60495	2	0	2
Molecular function	GO:0004722	protein serine/threonine phosphatase activity	8/2180	116/26545	0.745795	1	g13531/g23966/g2873/g29432/g3010/g50469/g6101/g63974	8	4	4
Molecular function	GO:0003725	double-stranded RNA binding	1/2180	16/26545	0.746275	1	g10186	1	0	1
Molecular function	GO:0003846	2-acylglycerol O-acyltransferase activity	1/2180	16/26545	0.746275	1	g17073	1	0	1
Molecular function	GO:0003916	DNA topoisomerase activity	1/2180	16/26545	0.746275	1	g57703	1	0	1
Molecular function	GO:0004439	phosphatidylinositol-4,5-bisphosphate 5-phosphatase activity	1/2180	16/26545	0.746275	1	g60160	1	0	1
Molecular function	GO:0004622	lysophospholipase activity	1/2180	16/26545	0.746275	1	g17073	1	0	1
Molecular function	GO:0008239	dipeptidyl-peptidase activity	1/2180	16/26545	0.746275	1	g47756	1	0	1
Molecular function	GO:0016778	diphosphotransferase activity	1/2180	16/26545	0.746275	1	g55182	1	0	1
Molecular function	GO:0090430	caffeoyl-CoA: alcohol caffeoyl transferase activity	1/2180	16/26545	0.746275	1	g17073	1	0	1
Molecular function	GO:0106019	phosphatidylinositol-4,5-bisphosphate phosphatase activity	1/2180	16/26545	0.746275	1	g60160	1	0	1
Molecular function	GO:0016410	N-acyltransferase activity	6/2180	89/26545	0.748965	1	g1049/g29047/g35276/g39309/g50327/g53874	6	2	4
Molecular function	GO:0015605	organophosphate ester transmembrane transporter activity	2/2180	32/26545	0.751286	1	g21545/g34438	2	1	1
Molecular function	GO:0019104	DNA N-glycosylase activity	2/2180	32/26545	0.751286	1	g31549/g39705	2	1	1
Molecular function	GO:0033218	amide binding	8/2180	117/26545	0.754274	1	g17180/g31128/g41992/g44452/g44501/g511/g58850/g62127	8	4	4
Molecular function	GO:0043621	protein self-association	16/2180	224/26545	0.755168	1	g12557/g12615/g16082/g185/g20439/g26328/g29570/g38556/g41709/g50478/g53797/g55198/g7950/g7958/g7995/g8186	16	1	15
Molecular function	GO:0030145	manganese ion binding	4/2180	62/26545	0.760011	1	g47115/g50500/g50952/g61562	4	1	3
Molecular function	GO:0004029	aldehyde dehydrogenase (NAD) activity	2/2180	33/26545	0.766441	1	g19680/g28449	2	1	1
Molecular function	GO:0005179	hormone activity	1/2180	17/26545	0.767125	1	g34061	1	1	0
Molecular function	GO:0005545	1-phosphatidylinositol binding	1/2180	17/26545	0.767125	1	g50306	1	1	0
Molecular function	GO:0009378	four-way junction helicase activity	1/2180	17/26545	0.767125	1	g55662	1	1	0
Molecular function	GO:0015301	anion:anion antiporter activity	1/2180	17/26545	0.767125	1	g11681	1	0	1
Molecular function	GO:0034595	phosphatidylinositol phosphate 5-phosphatase activity	1/2180	17/26545	0.767125	1	g60160	1	0	1
Molecular function	GO:0043140	ATP-dependent 3'-5' DNA helicase activity	1/2180	17/26545	0.767125	1	g55662	1	1	0
Molecular function	GO:1990538	xylan O-acetyltransferase activity	1/2180	17/26545	0.767125	1	g20388	1	0	1
Molecular function	GO:0003924	GTPase activity	19/2180	266/26545	0.769575	1	g15335/g20583/g25212/g30787/g37635/g37636/g37637/g38689/g43062/g43652/g43654/g45701/g4973/g55622/g56452/g57076/g57082/g63729/g9986	19	2	17
Molecular function	GO:0000977	RNA polymerase II regulatory region sequence-specific DNA binding	24/2180	332/26545	0.772113	1	g10197/g13583/g16330/g20532/g21637/g24748/g25336/g25337/g26289/g28896/g29136/g29137/g29145/g30783/g31138/g34250/g397/g40206/g42011/g43804/g47882/g5515/g59550/g63231	24	7	17
Molecular function	GO:0001012	RNA polymerase II regulatory region DNA binding	24/2180	332/26545	0.772113	1	g10197/g13583/g16330/g20532/g21637/g24748/g25336/g25337/g26289/g28896/g29136/g29137/g29145/g30783/g31138/g34250/g397/g40206/g42011/g43804/g47882/g5515/g59550/g63231	24	7	17
Molecular function	GO:0008236	serine-type peptidase activity	18/2180	254/26545	0.776037	1	g1196/g13223/g20038/g2483/g25776/g31123/g34500/g34662/g37012/g37578/g41241/g47756/g49802/g55174/g58637/g59200/g60581/g60820	18	6	12
Molecular function	GO:0017171	serine hydrolase activity	18/2180	254/26545	0.776037	1	g1196/g13223/g20038/g2483/g25776/g31123/g34500/g34662/g37012/g37578/g41241/g47756/g49802/g55174/g58637/g59200/g60581/g60820	18	6	12
Molecular function	GO:0005249	voltage-gated potassium channel activity	3/2180	49/26545	0.77813	1	g1277/g21204/g59436	3	1	2
Molecular function	GO:0008536	Ran GTPase binding	2/2180	34/26545	0.780785	1	g511/g58850	2	1	1
Molecular function	GO:0004712	protein serine/threonine/tyrosine kinase activity	6/2180	93/26545	0.78549	1	g19842/g31713/g33994/g38042/g6355/g6380	6	0	6
Molecular function	GO:0015079	potassium ion transmembrane transporter activity	8/2180	121/26545	0.786183	1	g1277/g13677/g21204/g25454/g54899/g54900/g59436/g60783	8	4	4
Molecular function	GO:0003691	double-stranded telomeric DNA binding	1/2180	18/26545	0.786262	1	g4930	1	0	1
Molecular function	GO:0003951	NAD+ kinase activity	1/2180	18/26545	0.786262	1	g11388	1	0	1
Molecular function	GO:0004040	amidase activity	1/2180	18/26545	0.786262	1	g59563	1	1	0
Molecular function	GO:0004315	3-oxoacyl-[acyl-carrier-protein] synthase activity	1/2180	18/26545	0.786262	1	g14607	1	1	0
Molecular function	GO:0008641	ubiquitin-like modifier activating enzyme activity	1/2180	18/26545	0.786262	1	g43081	1	0	1
Molecular function	GO:0010427	abscisic acid binding	1/2180	18/26545	0.786262	1	g19566	1	0	1
Molecular function	GO:0031490	chromatin DNA binding	1/2180	18/26545	0.786262	1	g15198	1	1	0
Molecular function	GO:0032452	histone demethylase activity	1/2180	18/26545	0.786262	1	g38373	1	0	1
Molecular function	GO:0034593	phosphatidylinositol bisphosphate phosphatase activity	1/2180	18/26545	0.786262	1	g60160	1	0	1
Molecular function	GO:0043138	3'-5' DNA helicase activity	1/2180	18/26545	0.786262	1	g55662	1	1	0
Molecular function	GO:0047631	ADP-ribose diphosphatase activity	1/2180	18/26545	0.786262	1	g35358	1	1	0
Molecular function	GO:0102811	geraniol 10-hydroxylase activity	1/2180	18/26545	0.786262	1	g1143	1	1	0
Molecular function	GO:0001871	pattern binding	15/2180	216/26545	0.78648	1	g19281/g20647/g23169/g23985/g24446/g24659/g3495/g41192/g4558/g50046/g53278/g54756/g59343/g60470/g62861	15	3	12
Molecular function	GO:0030247	polysaccharide binding	15/2180	216/26545	0.78648	1	g19281/g20647/g23169/g23985/g24446/g24659/g3495/g41192/g4558/g50046/g53278/g54756/g59343/g60470/g62861	15	3	12
Molecular function	GO:0016854	racemase and epimerase activity	5/2180	79/26545	0.787284	1	g16082/g26682/g39116/g54221/g9195	5	2	3
Molecular function	GO:0005262	calcium channel activity	4/2180	65/26545	0.791726	1	g1277/g37945/g5113/g54255	4	3	1
Molecular function	GO:0052716	hydroquinone:oxygen oxidoreductase activity	2/2180	35/26545	0.79435	1	g17903/g25541	2	0	2
Molecular function	GO:0008408	3'-5' exonuclease activity	5/2180	80/26545	0.796367	1	g1101/g41637/g4532/g53332/g9975	5	1	4
Molecular function	GO:0016411	acylglycerol O-acyltransferase activity	3/2180	51/26545	0.80084	1	g17073/g23869/g43255	3	0	3
Molecular function	GO:0051287	NAD binding	7/2180	109/26545	0.800971	1	g14135/g17371/g18387/g24724/g32551/g32562/g7921	7	0	7
Molecular function	GO:0000210	NAD+ diphosphatase activity	1/2180	19/26545	0.803827	1	g35358	1	1	0
Molecular function	GO:0000295	adenine nucleotide transmembrane transporter activity	1/2180	19/26545	0.803827	1	g21545	1	1	0
Molecular function	GO:0005346	purine ribonucleotide transmembrane transporter activity	1/2180	19/26545	0.803827	1	g21545	1	1	0
Molecular function	GO:0015165	pyrimidine nucleotide-sugar transmembrane transporter activity	1/2180	19/26545	0.803827	1	g57893	1	1	0
Molecular function	GO:0015216	purine nucleotide transmembrane transporter activity	1/2180	19/26545	0.803827	1	g21545	1	1	0
Molecular function	GO:0016229	steroid dehydrogenase activity	1/2180	19/26545	0.803827	1	g14657	1	0	1
Molecular function	GO:0008139	nuclear localization sequence binding	2/2180	36/26545	0.807166	1	g511/g58850	2	1	1
Molecular function	GO:0003682	chromatin binding	13/2180	193/26545	0.809011	1	g10197/g15198/g2316/g24003/g25584/g31138/g32681/g397/g42011/g43672/g47745/g47882/g5515	13	7	6
Molecular function	GO:0004527	exonuclease activity	8/2180	125/26545	0.814921	1	g1101/g21337/g41637/g4532/g48089/g53332/g57339/g9975	8	3	5
Molecular function	GO:0004864	protein phosphatase inhibitor activity	1/2180	20/26545	0.819949	1	g19566	1	0	1
Molecular function	GO:0019212	phosphatase inhibitor activity	1/2180	20/26545	0.819949	1	g19566	1	0	1
Molecular function	GO:0000976	transcription regulatory region sequence-specific DNA binding	30/2180	422/26545	0.820831	1	g10197/g13583/g16330/g20532/g21637/g24748/g25336/g25337/g26289/g26525/g28896/g29136/g29137/g29145/g30783/g31138/g34250/g36835/g38640/g397/g40206/g42011/g43804/g47745/g47882/g5515/g57590/g59550/g63231/g7739	30	10	20
Molecular function	GO:0042887	amide transmembrane transporter activity	3/2180	53/26545	0.821566	1	g25653/g3611/g4982	3	1	2
Molecular function	GO:0022843	voltage-gated cation channel activity	3/2180	54/26545	0.831221	1	g1277/g21204/g59436	3	1	2
Molecular function	GO:0005089	Rho guanyl-nucleotide exchange factor activity	1/2180	21/26545	0.834747	1	g31398	1	0	1
Molecular function	GO:0008649	rRNA methyltransferase activity	1/2180	21/26545	0.834747	1	g29366	1	1	0
Molecular function	GO:0035673	oligopeptide transmembrane transporter activity	1/2180	21/26545	0.834747	1	g4982	1	1	0
Molecular function	GO:0140102	catalytic activity, acting on a rRNA	1/2180	21/26545	0.834747	1	g29366	1	1	0
Molecular function	GO:0005484	SNAP receptor activity	5/2180	85/26545	0.837267	1	g13875/g17399/g20665/g43096/g49453	5	2	3
Molecular function	GO:0004402	histone acetyltransferase activity	2/2180	39/26545	0.841439	1	g29047/g53874	2	0	2
Molecular function	GO:0016799	hydrolase activity, hydrolyzing N-glycosyl compounds	2/2180	39/26545	0.841439	1	g31549/g39705	2	1	1
Molecular function	GO:0061733	peptide-lysine-N-acetyltransferase activity	2/2180	39/26545	0.841439	1	g29047/g53874	2	0	2
Molecular function	GO:0015215	nucleotide transmembrane transporter activity	1/2180	22/26545	0.848329	1	g21545	1	1	0
Molecular function	GO:0046933	proton-transporting ATP synthase activity, rotational mechanism	1/2180	22/26545	0.848329	1	g59328	1	0	1
Molecular function	GO:0102336	3-oxo-arachidoyl-CoA synthase activity	1/2180	22/26545	0.848329	1	g4805	1	1	0
Molecular function	GO:0102337	3-oxo-cerotoyl-CoA synthase activity	1/2180	22/26545	0.848329	1	g4805	1	1	0
Molecular function	GO:0102338	3-oxo-lignoceronyl-CoA synthase activity	1/2180	22/26545	0.848329	1	g4805	1	1	0
Molecular function	GO:0102756	very-long-chain 3-ketoacyl-CoA synthase activity	1/2180	22/26545	0.848329	1	g4805	1	1	0
Molecular function	GO:0015276	ligand-gated ion channel activity	3/2180	56/26545	0.849187	1	g1277/g37945/g54255	3	2	1
Molecular function	GO:0022834	ligand-gated channel activity	3/2180	56/26545	0.849187	1	g1277/g37945/g54255	3	2	1
Molecular function	GO:0042277	peptide binding	5/2180	87/26545	0.851625	1	g31128/g41992/g511/g58850/g62127	5	3	2
Molecular function	GO:0015662	ATPase activity, coupled to transmembrane movement of ions, phosphorylative mechanism	4/2180	72/26545	0.852665	1	g26605/g62131/g62132/g8454	4	0	4
Molecular function	GO:0016811	hydrolase activity, acting on carbon-nitrogen (but not peptide) bonds, in linear amides	4/2180	72/26545	0.852665	1	g34248/g38711/g41920/g59563	4	2	2
Molecular function	GO:0004707	MAP kinase activity	1/2180	23/26545	0.860795	1	g35181	1	0	1
Molecular function	GO:0008198	ferrous iron binding	1/2180	23/26545	0.860795	1	g20747	1	0	1
Molecular function	GO:0004177	aminopeptidase activity	2/2180	41/26545	0.861115	1	g47115/g47756	2	0	2
Molecular function	GO:0004532	exoribonuclease activity	2/2180	41/26545	0.861115	1	g4532/g9975	2	1	1
Molecular function	GO:0016896	exoribonuclease activity, producing 5'-phosphomonoesters	2/2180	41/26545	0.861115	1	g4532/g9975	2	1	1
Molecular function	GO:0001882	nucleoside binding	27/2180	394/26545	0.861819	1	g1101/g12899/g15335/g16901/g20583/g25212/g30787/g34402/g37635/g37636/g37637/g38689/g43062/g43652/g43654/g45701/g46697/g48971/g4973/g53927/g55182/g55622/g56452/g57076/g57082/g63729/g9986	27	4	23
Molecular function	GO:1990837	sequence-specific double-stranded DNA binding	33/2180	474/26545	0.862172	1	g10197/g13583/g16330/g20532/g21637/g24748/g25336/g25337/g25720/g26289/g26525/g28896/g29136/g29137/g29145/g30783/g31138/g34250/g36835/g38640/g397/g40206/g42011/g42035/g43804/g47745/g47882/g5515/g57590/g59550/g60234/g63231/g7739	33	12	21
Molecular function	GO:0001883	purine nucleoside binding	26/2180	381/26545	0.863093	1	g12899/g15335/g16901/g20583/g25212/g30787/g34402/g37635/g37636/g37637/g38689/g43062/g43652/g43654/g45701/g46697/g48971/g4973/g53927/g55182/g55622/g56452/g57076/g57082/g63729/g9986	26	4	22
Molecular function	GO:0005525	GTP binding	26/2180	381/26545	0.863093	1	g12899/g15335/g16901/g20583/g25212/g30787/g34402/g37635/g37636/g37637/g38689/g43062/g43652/g43654/g45701/g46697/g48971/g4973/g53927/g55182/g55622/g56452/g57076/g57082/g63729/g9986	26	4	22
Molecular function	GO:0032550	purine ribonucleoside binding	26/2180	381/26545	0.863093	1	g12899/g15335/g16901/g20583/g25212/g30787/g34402/g37635/g37636/g37637/g38689/g43062/g43652/g43654/g45701/g46697/g48971/g4973/g53927/g55182/g55622/g56452/g57076/g57082/g63729/g9986	26	4	22
Molecular function	GO:0042803	protein homodimerization activity	25/2180	368/26545	0.864482	1	g13640/g16785/g19566/g19898/g19973/g25517/g25584/g2767/g2896/g33531/g33561/g34263/g39213/g41215/g42813/g43672/g46797/g47203/g48715/g48971/g5000/g50478/g59507/g61366/g9121	25	10	15
Molecular function	GO:0015299	solute:proton antiporter activity	3/2180	58/26545	0.865463	1	g54899/g54900/g60783	3	2	1
Molecular function	GO:0004003	ATP-dependent DNA helicase activity	2/2180	42/26545	0.87009	1	g23959/g55662	2	1	1
Molecular function	GO:0051087	chaperone binding	2/2180	42/26545	0.87009	1	g15882/g25310	2	0	2
Molecular function	GO:0005527	macrolide binding	1/2180	24/26545	0.872237	1	g24710	1	1	0
Molecular function	GO:0005528	FK506 binding	1/2180	24/26545	0.872237	1	g24710	1	1	0
Molecular function	GO:0008409	5'-3' exonuclease activity	1/2180	24/26545	0.872237	1	g48089	1	1	0
Molecular function	GO:0009982	pseudouridine synthase activity	1/2180	24/26545	0.872237	1	g49987	1	1	0
Molecular function	GO:0010385	double-stranded methylated DNA binding	1/2180	24/26545	0.872237	1	g64138	1	0	1
Molecular function	GO:0031624	ubiquitin conjugating enzyme binding	1/2180	24/26545	0.872237	1	g4301	1	1	0
Molecular function	GO:0015077	monovalent inorganic cation transmembrane transporter activity	21/2180	318/26545	0.878101	1	g11678/g1277/g13677/g13783/g14387/g14425/g1839/g21204/g22941/g25454/g54899/g54900/g59328/g59436/g59947/g59948/g60482/g60783/g6980/g7087/g9511	21	6	15
Molecular function	GO:0015932	nucleobase-containing compound transmembrane transporter activity	3/2180	60/26545	0.880172	1	g21545/g57893/g59245	3	3	0
Molecular function	GO:0004012	phospholipid-translocating ATPase activity	1/2180	25/26545	0.882739	1	g17796	1	0	1
Molecular function	GO:0008168	methyltransferase activity	28/2180	415/26545	0.884536	1	g1100/g11537/g13668/g16430/g19897/g19978/g24221/g24907/g27492/g27493/g29347/g29366/g32681/g42698/g43455/g46588/g4724/g52434/g54501/g54560/g54578/g54579/g553/g63360/g63382/g63758/g64138/g8134	28	4	24
Molecular function	GO:0051015	actin filament binding	3/2180	61/26545	0.886975	1	g49000/g5138/g60589	3	0	3
Molecular function	GO:0032549	ribonucleoside binding	26/2180	390/26545	0.890136	1	g12899/g15335/g16901/g20583/g25212/g30787/g34402/g37635/g37636/g37637/g38689/g43062/g43652/g43654/g45701/g46697/g48971/g4973/g53927/g55182/g55622/g56452/g57076/g57082/g63729/g9986	26	4	22
Molecular function	GO:0005048	signal sequence binding	3/2180	62/26545	0.893431	1	g31128/g511/g58850	3	2	1
Molecular function	GO:0018024	histone-lysine N-methyltransferase activity	3/2180	62/26545	0.893431	1	g11537/g43455/g64138	3	1	2
Molecular function	GO:0034212	peptide N-acetyltransferase activity	2/2180	45/26545	0.893906	1	g29047/g53874	2	0	2
Molecular function	GO:0005261	cation channel activity	7/2180	125/26545	0.896399	1	g1277/g21204/g37945/g5113/g54255/g59436/g9516	7	5	2
Molecular function	GO:0003697	single-stranded DNA binding	4/2180	79/26545	0.897752	1	g33985/g49077/g5464/g59605	4	2	2
Molecular function	GO:0004713	protein tyrosine kinase activity	3/2180	63/26545	0.899554	1	g33482/g41992/g4916	3	1	2
Molecular function	GO:0005267	potassium channel activity	3/2180	63/26545	0.899554	1	g1277/g21204/g59436	3	1	2
Molecular function	GO:0004551	nucleotide diphosphatase activity	1/2180	27/26545	0.901225	1	g35358	1	1	0
Molecular function	GO:0004725	protein tyrosine phosphatase activity	1/2180	27/26545	0.901225	1	g60767	1	0	1
Molecular function	GO:0005338	nucleotide-sugar transmembrane transporter activity	1/2180	27/26545	0.901225	1	g57893	1	1	0
Molecular function	GO:0005548	phospholipid transporter activity	1/2180	27/26545	0.901225	1	g17796	1	0	1
Molecular function	GO:0030551	cyclic nucleotide binding	1/2180	27/26545	0.901225	1	g1277	1	0	1
Molecular function	GO:0030552	cAMP binding	1/2180	27/26545	0.901225	1	g1277	1	0	1
Molecular function	GO:0030553	cGMP binding	1/2180	27/26545	0.901225	1	g1277	1	0	1
Molecular function	GO:0043424	protein histidine kinase binding	1/2180	27/26545	0.901225	1	g24574	1	0	1
Molecular function	GO:0052866	phosphatidylinositol phosphate phosphatase activity	1/2180	27/26545	0.901225	1	g60160	1	0	1
Molecular function	GO:0019001	guanyl nucleotide binding	27/2180	408/26545	0.901701	1	g1277/g12899/g15335/g16901/g20583/g25212/g30787/g34402/g37635/g37636/g37637/g38689/g43062/g43652/g43654/g45701/g46697/g48971/g4973/g53927/g55182/g55622/g56452/g57076/g57082/g63729/g9986	27	4	23
Molecular function	GO:0032561	guanyl ribonucleotide binding	27/2180	408/26545	0.901701	1	g1277/g12899/g15335/g16901/g20583/g25212/g30787/g34402/g37635/g37636/g37637/g38689/g43062/g43652/g43654/g45701/g46697/g48971/g4973/g53927/g55182/g55622/g56452/g57076/g57082/g63729/g9986	27	4	23
Molecular function	GO:0016791	phosphatase activity	30/2180	450/26545	0.904795	1	g12828/g13415/g13531/g15332/g1767/g23966/g25128/g2873/g29432/g3010/g30831/g31370/g31371/g3141/g37631/g38366/g42126/g49876/g50469/g55559/g57340/g58886/g59217/g59764/g60089/g60160/g60767/g6101/g62415/g63974	30	7	23
Molecular function	GO:0004970	ionotropic glutamate receptor activity	2/2180	47/26545	0.907456	1	g37945/g54255	2	2	0
Molecular function	GO:0005230	extracellular ligand-gated ion channel activity	2/2180	47/26545	0.907456	1	g37945/g54255	2	2	0
Molecular function	GO:0008066	glutamate receptor activity	2/2180	47/26545	0.907456	1	g37945/g54255	2	2	0
Molecular function	GO:0022824	transmitter-gated ion channel activity	2/2180	47/26545	0.907456	1	g37945/g54255	2	2	0
Molecular function	GO:0022835	transmitter-gated channel activity	2/2180	47/26545	0.907456	1	g37945/g54255	2	2	0
Molecular function	GO:0030594	neurotransmitter receptor activity	2/2180	47/26545	0.907456	1	g37945/g54255	2	2	0
Molecular function	GO:0008692	3-hydroxybutyryl-CoA epimerase activity	1/2180	28/26545	0.909345	1	g54221	1	0	1
Molecular function	GO:0016856	racemase and epimerase activity, acting on hydroxy acids and derivatives	1/2180	28/26545	0.909345	1	g54221	1	0	1
Molecular function	GO:0017048	Rho GTPase binding	1/2180	28/26545	0.909345	1	g31398	1	0	1
Molecular function	GO:0008170	N-methyltransferase activity	6/2180	113/26545	0.910309	1	g11537/g24221/g29366/g43455/g52434/g64138	6	2	4
Molecular function	GO:0015298	solute:cation antiporter activity	3/2180	65/26545	0.910855	1	g54899/g54900/g60783	3	2	1
Molecular function	GO:0005096	GTPase activator activity	4/2180	82/26545	0.913025	1	g17111/g186/g32212/g58189	4	2	2
Molecular function	GO:0030695	GTPase regulator activity	4/2180	82/26545	0.913025	1	g17111/g186/g32212/g58189	4	2	2
Molecular function	GO:0016722	oxidoreductase activity, oxidizing metal ions	3/2180	66/26545	0.916062	1	g17903/g25368/g25541	3	0	3
Molecular function	GO:0003857	3-hydroxyacyl-CoA dehydrogenase activity	1/2180	29/26545	0.916798	1	g54221	1	0	1
Molecular function	GO:0003899	DNA-directed 5'-3' RNA polymerase activity	3/2180	67/26545	0.92099	1	g1101/g49077/g54946	3	0	3
Molecular function	GO:0016853	isomerase activity	26/2180	403/26545	0.921569	1	g1386/g16082/g16744/g23527/g24710/g26682/g30545/g34097/g37228/g39116/g39707/g39788/g43457/g43959/g49987/g50425/g50952/g52957/g53211/g54221/g56269/g57703/g58345/g60543/g752/g9195	26	7	19
Molecular function	GO:0010334	sesquiterpene synthase activity	1/2180	30/26545	0.923639	1	g12915	1	0	1
Molecular function	GO:0035064	methylated histone binding	1/2180	30/26545	0.923639	1	g47745	1	1	0
Molecular function	GO:0140034	methylation-dependent protein binding	1/2180	30/26545	0.923639	1	g47745	1	1	0
Molecular function	GO:0016741	transferase activity, transferring one-carbon groups	28/2180	433/26545	0.926582	1	g1100/g11537/g13668/g16430/g19897/g19978/g24221/g24907/g27492/g27493/g29347/g29366/g32681/g42698/g43455/g46588/g4724/g52434/g54501/g54560/g54578/g54579/g553/g63360/g63382/g63758/g64138/g8134	28	4	24
Molecular function	GO:0004683	calmodulin-dependent protein kinase activity	2/2180	51/26545	0.929831	1	g13127/g25109	2	1	1
Molecular function	GO:0004300	enoyl-CoA hydratase activity	1/2180	31/26545	0.929917	1	g54221	1	0	1
Molecular function	GO:0016780	phosphotransferase activity, for other substituted phosphate groups	1/2180	31/26545	0.929917	1	g3411	1	1	0
Molecular function	GO:0016881	acid-amino acid ligase activity	1/2180	31/26545	0.929917	1	g54101	1	0	1
Molecular function	GO:0019829	cation-transporting ATPase activity	6/2180	120/26545	0.935807	1	g26605/g39164/g59328/g62131/g62132/g8454	6	0	6
Molecular function	GO:0022853	active ion transmembrane transporter activity	6/2180	120/26545	0.935807	1	g26605/g39164/g59328/g62131/g62132/g8454	6	0	6
Molecular function	GO:0042625	ATPase coupled ion transmembrane transporter activity	6/2180	120/26545	0.935807	1	g26605/g39164/g59328/g62131/g62132/g8454	6	0	6
Molecular function	GO:0004252	serine-type endopeptidase activity	9/2180	167/26545	0.937419	1	g13223/g20038/g25776/g34662/g37012/g37578/g49802/g55174/g60581	9	4	5
Molecular function	GO:0000149	SNARE binding	4/2180	88/26545	0.9376	1	g13875/g20665/g43096/g49453	4	1	3
Molecular function	GO:0016879	ligase activity, forming carbon-nitrogen bonds	4/2180	88/26545	0.9376	1	g29752/g44735/g44770/g54101	4	0	4
Molecular function	GO:0016796	exonuclease activity, active with either ribo- or deoxyribonucleic acids and producing 5'-phosphomonoesters	2/2180	53/26545	0.938997	1	g4532/g9975	2	1	1
Molecular function	GO:0004536	deoxyribonuclease activity	1/2180	33/26545	0.940968	1	g21337	1	1	0
Molecular function	GO:0016278	lysine N-methyltransferase activity	3/2180	73/26545	0.945388	1	g11537/g43455/g64138	3	1	2
Molecular function	GO:0016279	protein-lysine N-methyltransferase activity	3/2180	73/26545	0.945388	1	g11537/g43455/g64138	3	1	2
Molecular function	GO:0004165	dodecenoyl-CoA delta-isomerase activity	1/2180	34/26545	0.945822	1	g54221	1	0	1
Molecular function	GO:0005088	Ras guanyl-nucleotide exchange factor activity	1/2180	34/26545	0.945822	1	g31398	1	0	1
Molecular function	GO:0003755	peptidyl-prolyl cis-trans isomerase activity	3/2180	74/26545	0.9487	1	g24710/g43959/g52957	3	1	2
Molecular function	GO:0004803	transposase activity	1/2180	35/26545	0.950277	1	g40360	1	0	1
Molecular function	GO:0004197	cysteine-type endopeptidase activity	2/2180	56/26545	0.950642	1	g34606/g46137	2	0	2
Molecular function	GO:0060589	nucleoside-triphosphatase regulator activity	4/2180	93/26545	0.953058	1	g17111/g186/g32212/g58189	4	2	2
Molecular function	GO:0008234	cysteine-type peptidase activity	13/2180	235/26545	0.954405	1	g14737/g23866/g2527/g28291/g34606/g36079/g36164/g37800/g44983/g46137/g46138/g55533/g5831	13	6	7
Molecular function	GO:0005085	guanyl-nucleotide exchange factor activity	3/2180	77/26545	0.957544	1	g25584/g31398/g43672	3	2	1
Molecular function	GO:0050897	cobalt ion binding	1/2180	37/26545	0.958119	1	g46302	1	0	1
Molecular function	GO:0005543	phospholipid binding	8/2180	161/26545	0.958807	1	g13384/g13385/g17111/g50306/g57832/g57833/g606/g634	8	1	7
Molecular function	GO:0042054	histone methyltransferase activity	3/2180	78/26545	0.960159	1	g11537/g43455/g64138	3	1	2
Molecular function	GO:0044183	protein binding involved in protein folding	1/2180	38/26545	0.961563	1	g46535	1	1	0
Molecular function	GO:0008237	metallopeptidase activity	5/2180	114/26545	0.962394	1	g34157/g43201/g47115/g54710/g58340	5	1	4
Molecular function	GO:0016863	intramolecular oxidoreductase activity, transposing C=C bonds	1/2180	39/26545	0.964724	1	g54221	1	0	1
Molecular function	GO:0016859	cis-trans isomerase activity	3/2180	81/26545	0.967125	1	g24710/g43959/g52957	3	1	2
Molecular function	GO:0016866	intramolecular transferase activity	3/2180	81/26545	0.967125	1	g49987/g50952/g53211	3	2	1
Molecular function	GO:0003713	transcription coactivator activity	1/2180	40/26545	0.967625	1	g63073	1	0	1
Molecular function	GO:0019904	protein domain specific binding	2/2180	62/26545	0.967878	1	g60203/g9966	2	1	1
Molecular function	GO:0003746	translation elongation factor activity	2/2180	63/26545	0.970118	1	g20792/g55622	2	0	2
Molecular function	GO:0004176	ATP-dependent peptidase activity	1/2180	41/26545	0.970288	1	g34662	1	1	0
Molecular function	GO:0017016	Ras GTPase binding	3/2180	83/26545	0.971112	1	g31398/g511/g58850	3	1	2
Molecular function	GO:0031267	small GTPase binding	3/2180	83/26545	0.971112	1	g31398/g511/g58850	3	1	2
Molecular function	GO:0008757	S-adenosylmethionine-dependent methyltransferase activity	14/2180	262/26545	0.971349	1	g1100/g11537/g24221/g29366/g32681/g43455/g52434/g54560/g54579/g553/g63360/g63382/g63758/g64138	14	2	12
Molecular function	GO:0140030	modification-dependent protein binding	1/2180	42/26545	0.972732	1	g47745	1	1	0
Molecular function	GO:1904680	peptide transmembrane transporter activity	1/2180	43/26545	0.974975	1	g4982	1	1	0
Molecular function	GO:0051082	unfolded protein binding	6/2180	139/26545	0.975674	1	g20607/g23360/g35596/g35666/g42615/g54810	6	0	6
Molecular function	GO:0005244	voltage-gated ion channel activity	3/2180	86/26545	0.976244	1	g1277/g21204/g59436	3	1	2
Molecular function	GO:0022832	voltage-gated channel activity	3/2180	86/26545	0.976244	1	g1277/g21204/g59436	3	1	2
Molecular function	GO:0022836	gated channel activity	6/2180	141/26545	0.978139	1	g1277/g21204/g37945/g54255/g59436/g9516	6	4	2
Molecular function	GO:0003684	damaged DNA binding	1/2180	45/26545	0.978923	1	g43285	1	1	0
Molecular function	GO:0008565	protein transporter activity	4/2180	108/26545	0.980745	1	g511/g5248/g5858/g58850	4	2	2
Molecular function	GO:0015085	calcium ion transmembrane transporter activity	5/2180	126/26545	0.980778	1	g1277/g37945/g5113/g54255/g8454	5	3	2
Molecular function	GO:0005388	calcium-transporting ATPase activity	1/2180	48/26545	0.983708	1	g8454	1	0	1
Molecular function	GO:0030276	clathrin binding	1/2180	48/26545	0.983708	1	g50306	1	1	0
Molecular function	GO:0005216	ion channel activity	7/2180	165/26545	0.984918	1	g1277/g21204/g37945/g5113/g54255/g59436/g9516	7	5	2
Molecular function	GO:0044877	protein-containing complex binding	8/2180	182/26545	0.985063	1	g17207/g43124/g49000/g5138/g60589/g7593/g849/g850	8	0	8
Molecular function	GO:0009931	calcium-dependent protein serine/threonine kinase activity	1/2180	50/26545	0.986279	1	g13127	1	1	0
Molecular function	GO:0010857	calcium-dependent protein kinase activity	1/2180	50/26545	0.986279	1	g13127	1	1	0
Molecular function	GO:0044769	ATPase activity, coupled to transmembrane movement of ions, rotational mechanism	1/2180	50/26545	0.986279	1	g59328	1	0	1
Molecular function	GO:0008173	RNA methyltransferase activity	1/2180	52/26545	0.988444	1	g29366	1	1	0
Molecular function	GO:0043130	ubiquitin binding	1/2180	52/26545	0.988444	1	g58803	1	0	1
Molecular function	GO:0022839	ion gated channel activity	5/2180	135/26545	0.988605	1	g1277/g21204/g37945/g54255/g59436	5	3	2
Molecular function	GO:0008094	DNA-dependent ATPase activity	3/2180	98/26545	0.989326	1	g23959/g55662/g57703	3	1	2
Molecular function	GO:0008276	protein methyltransferase activity	3/2180	98/26545	0.989326	1	g11537/g43455/g64138	3	1	2
Molecular function	GO:0032182	ubiquitin-like protein binding	1/2180	53/26545	0.989395	1	g58803	1	0	1
Molecular function	GO:0035091	phosphatidylinositol binding	3/2180	99/26545	0.990026	1	g13384/g13385/g50306	3	1	2
Molecular function	GO:0003779	actin binding	7/2180	173/26545	0.990142	1	g25434/g38978/g46347/g49000/g5100/g5138/g60589	7	2	5
Molecular function	GO:0070566	adenylyltransferase activity	1/2180	54/26545	0.990268	1	g55556	1	0	1
Molecular function	GO:0051020	GTPase binding	5/2180	140/26545	0.991533	1	g25584/g31398/g43672/g511/g58850	5	3	2
Molecular function	GO:0140101	catalytic activity, acting on a tRNA	6/2180	160/26545	0.992378	1	g12280/g38115/g38263/g38959/g59566/g61293	6	0	6
Molecular function	GO:0004812	aminoacyl-tRNA ligase activity	2/2180	83/26545	0.993193	1	g38115/g61293	2	0	2
Molecular function	GO:0016875	ligase activity, forming carbon-oxygen bonds	2/2180	83/26545	0.993193	1	g38115/g61293	2	0	2
Molecular function	GO:0003727	single-stranded RNA binding	2/2180	87/26545	0.994968	1	g21337/g45799	2	1	1
Molecular function	GO:0016874	ligase activity	16/2180	340/26545	0.995932	1	g27170/g29752/g31013/g31014/g38115/g43081/g44735/g44770/g460/g51902/g54101/g5538/g58521/g59630/g61293/g7903	16	1	15
Molecular function	GO:0043021	ribonucleoprotein complex binding	1/2180	66/26545	0.996528	1	g17207	1	0	1
Molecular function	GO:0004721	phosphoprotein phosphatase activity	10/2180	245/26545	0.996612	1	g13531/g23966/g2873/g29432/g3010/g3141/g50469/g60767/g6101/g63974	10	4	6
Molecular function	GO:0042393	histone binding	4/2180	136/26545	0.996754	1	g17497/g47745/g4799/g4800	4	1	3
Molecular function	GO:0036459	thiol-dependent ubiquitinyl hydrolase activity	1/2180	71/26545	0.997741	1	g14737	1	0	1
Molecular function	GO:0101005	ubiquitinyl hydrolase activity	1/2180	73/26545	0.998097	1	g14737	1	0	1
Molecular function	GO:0004222	metalloendopeptidase activity	1/2180	77/26545	0.998651	1	g54710	1	0	1
Molecular function	GO:0019783	ubiquitin-like protein-specific protease activity	1/2180	84/26545	0.999261	1	g14737	1	0	1
Molecular function	GO:0003724	RNA helicase activity	1/2180	118/26545	0.99996	1	g25261	1	0	1
Molecular function	GO:0003743	translation initiation factor activity	1/2180	119/26545	0.999964	1	g55208	1	1	0
Molecular function	GO:0008026	ATP-dependent helicase activity	2/2180	155/26545	0.999976	1	g23959/g55662	2	1	1
Molecular function	GO:0070035	purine NTP-dependent helicase activity	2/2180	155/26545	0.999976	1	g23959/g55662	2	1	1
Molecular function	GO:0008135	translation factor activity, RNA binding	3/2180	183/26545	0.999978	1	g20792/g55208/g55622	3	1	2
Molecular function	GO:0003678	DNA helicase activity	3/2180	202/26545	0.999995	1	g11152/g23959/g55662	3	2	1
Molecular function	GO:0003729	mRNA binding	11/2180	437/26545	1	1	g24003/g27600/g28257/g31619/g49690/g49759/g54221/g54953/g57833/g60589/g8732	11	2	9
Molecular function	GO:0034062	5'-3' RNA polymerase activity	4/2180	284/26545	1	1	g1101/g36646/g49077/g54946	4	1	3
Molecular function	GO:0097747	RNA polymerase activity	4/2180	284/26545	1	1	g1101/g36646/g49077/g54946	4	1	3
Molecular function	GO:0019843	rRNA binding	1/2180	192/26545	1	1	g45799	1	0	1
Molecular function	GO:0004386	helicase activity	11/2180	448/26545	1	1	g11152/g13906/g23959/g25261/g27600/g28257/g38314/g43226/g48089/g55208/g55662	11	5	6
Molecular function	GO:0003968	RNA-directed 5'-3' RNA polymerase activity	1/2180	217/26545	1	1	g36646	1	1	0
Molecular function	GO:0003735	structural constituent of ribosome	7/2180	482/26545	1	1	g10494/g12843/g31619/g49690/g49759/g55097/g59378	7	2	5
Biological process	GO:0009723	response to ethylene	93/2036	469/23933	8.32557e-15	1.70508e-11	g10049/g1049/g12377/g12832/g13125/g13132/g13143/g13146/g13520/g13657/g13822/g1386/g13922/g14886/g16261/g16288/g18675/g19564/g19589/g20475/g20476/g20630/g20714/g21675/g2168/g24292/g25021/g25212/g25276/g25395/g25719/g25723/g25726/g26142/g26149/g2711/g28289/g28924/g28993/g29674/g31713/g33906/g33907/g34420/g35092/g35139/g35276/g36835/g37800/g38561/g38562/g39164/g39309/g41863/g41923/g42120/g42128/g429…	93	25	68
Biological process	GO:0009611	response to wounding	66/2036	297/23933	3.0682e-13	3.14183e-10	g10719/g10724/g13640/g1386/g14222/g14749/g19707/g20826/g22006/g25726/g26118/g27600/g28257/g28289/g28394/g29047/g29758/g31186/g31288/g31550/g31615/g31713/g34263/g34312/g35053/g35504/g37258/g37945/g38746/g39254/g39389/g40205/g40236/g42120/g42128/g42390/g444/g4532/g45992/g46002/g46297/g46847/g51746/g5220/g54439/g55036/g55166/g55653/g57627/g58155/g59507/g60072/g60090/g60739/g60879/g6355/g670/g8369/g8…	66	8	58
Biological process	GO:0000160	phosphorelay signal transduction system	70/2036	337/23933	1.83197e-12	1.25062e-09	g12377/g12832/g13132/g13143/g13146/g13657/g13822/g13922/g14886/g15212/g16261/g16288/g18675/g19564/g19589/g20475/g20476/g20630/g21675/g2168/g24753/g24894/g25021/g25212/g25276/g25313/g25395/g25719/g25723/g26142/g26149/g26505/g28289/g29674/g30557/g31713/g34420/g35092/g35139/g39164/g42120/g42128/g43417/g43908/g46272/g49525/g50295/g50349/g50506/g54022/g54463/g5499/g5501/g55796/g57627/g59147/g59148/g60…	70	15	55
Biological process	GO:0009873	ethylene-activated signaling pathway	63/2036	297/23933	9.08138e-12	4.64967e-09	g12377/g12832/g13132/g13143/g13146/g13657/g13822/g13922/g14886/g16261/g16288/g18675/g19564/g19589/g20475/g20476/g20630/g21675/g2168/g25021/g25212/g25276/g25395/g25719/g25723/g26142/g26149/g28289/g29674/g31713/g34420/g35092/g35139/g39164/g42120/g42128/g43417/g43908/g46272/g49525/g50295/g50349/g54022/g54463/g5499/g5501/g55796/g57627/g59147/g59148/g60059/g60072/g60090/g60806/g62599/g62762/g6355/g670…	63	12	51
Biological process	GO:0071369	cellular response to ethylene stimulus	64/2036	316/23933	5.06223e-11	2.07349e-08	g12377/g12832/g13132/g13143/g13146/g13657/g13822/g13922/g14886/g16261/g16288/g18675/g19564/g19589/g20475/g20476/g20630/g21675/g2168/g25021/g25212/g25276/g25395/g25719/g25723/g26142/g26149/g28289/g29674/g31713/g34420/g35092/g35139/g39164/g42120/g42128/g43417/g43908/g46272/g49525/g50295/g50349/g54022/g54463/g5499/g5501/g55796/g57627/g57692/g59147/g59148/g60059/g60072/g60090/g60806/g62599/g62762/g63…	64	12	52
Biological process	GO:0010200	response to chitin	41/2036	165/23933	2.62247e-10	8.95137e-08	g10049/g12556/g13125/g14749/g14886/g18302/g19564/g19571/g19662/g20291/g2168/g24541/g25723/g28924/g28993/g29565/g29668/g29743/g31036/g31550/g34420/g35092/g35554/g38556/g38746/g41861/g41863/g41923/g42380/g49525/g50295/g51746/g55106/g57880/g58174/g60377/g60857/g60922/g9339/g9635/g9997	41	12	29
Biological process	GO:0009753	response to jasmonic acid	58/2036	305/23933	4.79601e-09	1.40318e-06	g10049/g12557/g12615/g13125/g13132/g13310/g13520/g13640/g13822/g1386/g13922/g14749/g16068/g18043/g18302/g20374/g2168/g24003/g24292/g24750/g25510/g25726/g26118/g27600/g28257/g28924/g28993/g29047/g29674/g29758/g31186/g31288/g31615/g33906/g33907/g35504/g36835/g36877/g37258/g37945/g41863/g41923/g42933/g444/g54135/g5499/g55036/g55166/g55796/g58391/g59134/g60377/g60879/g8319/g9465/g9633/g9635/g980	58	17	41
Biological process	GO:0009800	cinnamic acid biosynthetic process	11/2036	19/23933	6.53427e-08	1.48691e-05	g19515/g19518/g25246/g35053/g39254/g54983/g57981/g57984/g57987/g57989/g63872	11	0	11
Biological process	GO:0009803	cinnamic acid metabolic process	11/2036	19/23933	6.53427e-08	1.48691e-05	g19515/g19518/g25246/g35053/g39254/g54983/g57981/g57984/g57987/g57989/g63872	11	0	11
Biological process	GO:0015849	organic acid transport	35/2036	158/23933	1.17957e-07	2.19614e-05	g11681/g12421/g13729/g14583/g16711/g17415/g17700/g17702/g20254/g25645/g26575/g29833/g30005/g30081/g34192/g34263/g34438/g36364/g36463/g3657/g3878/g41848/g41989/g42460/g49909/g53918/g56009/g58883/g59385/g59507/g60437/g61413/g620/g644/g8613	35	8	27
Biological process	GO:0046942	carboxylic acid transport	35/2036	158/23933	1.17957e-07	2.19614e-05	g11681/g12421/g13729/g14583/g16711/g17415/g17700/g17702/g20254/g25645/g26575/g29833/g30005/g30081/g34192/g34263/g34438/g36364/g36463/g3657/g3878/g41848/g41989/g42460/g49909/g53918/g56009/g58883/g59385/g59507/g60437/g61413/g620/g644/g8613	35	8	27
Biological process	GO:0015711	organic anion transport	39/2036	189/23933	1.70635e-07	2.91217e-05	g11681/g12421/g13729/g14583/g16711/g17415/g17700/g17702/g20254/g21545/g25645/g26575/g29833/g30005/g30081/g34192/g34263/g34438/g36364/g36463/g3657/g3878/g41848/g41989/g42460/g4415/g49909/g53918/g56009/g58883/g59385/g59507/g59947/g59948/g60437/g61413/g620/g644/g8613	39	9	30
Biological process	GO:2000022	regulation of jasmonic acid mediated signaling pathway	16/2036	43/23933	2.03727e-07	3.20948e-05	g12557/g12615/g13640/g18043/g20374/g25510/g29758/g31186/g31288/g31615/g35504/g36877/g37258/g55036/g55166/g60879	16	1	15
Biological process	GO:0010105	negative regulation of ethylene-activated signaling pathway	15/2036	41/23933	6.31709e-07	8.62493e-05	g13143/g13146/g16261/g16288/g18675/g21675/g25719/g26149/g43417/g50349/g5501/g62599/g62762/g8333/g8401	15	0	15
Biological process	GO:0070298	negative regulation of phosphorelay signal transduction system	15/2036	41/23933	6.31709e-07	8.62493e-05	g13143/g13146/g16261/g16288/g18675/g21675/g25719/g26149/g43417/g50349/g5501/g62599/g62762/g8333/g8401	15	0	15
Biological process	GO:0018198	peptidyl-cysteine modification	8/2036	12/23933	9.80629e-07	0.000121777	g18795/g18933/g24646/g32184/g32267/g32268/g352/g53559	8	0	8
Biological process	GO:0005984	disaccharide metabolic process	23/2036	89/23933	1.01085e-06	0.000121777	g13783/g14109/g14387/g14425/g15600/g1767/g1839/g1840/g23246/g25369/g31210/g32506/g37631/g38321/g41296/g41626/g42126/g44130/g49876/g55056/g5718/g60089/g9975	23	5	18
Biological process	GO:0003333	amino acid transmembrane transport	22/2036	83/23933	1.08408e-06	0.000123344	g12421/g14583/g16711/g17415/g17700/g17702/g20254/g25645/g30005/g30081/g34192/g3657/g3878/g41848/g41989/g49909/g53918/g56009/g60437/g61413/g620/g644	22	5	17
Biological process	GO:0044550	secondary metabolite biosynthetic process	58/2036	360/23933	1.72333e-06	0.000185512	g1100/g11639/g14657/g16552/g16554/g17073/g17599/g17754/g17903/g19515/g19518/g19680/g20424/g24003/g24107/g24541/g24957/g25246/g25541/g25650/g29053/g29953/g29960/g31552/g31556/g31713/g32222/g34154/g35053/g39254/g41831/g41833/g41992/g46588/g47074/g47618/g47619/g50626/g50761/g5163/g51716/g54875/g54983/g553/g57981/g57984/g57987/g57989/g58619/g58629/g58655/g59699/g6355/g63758/g63872/g712/g7411/g9798	58	9	49
Biological process	GO:0007018	microtubule-based movement	25/2036	105/23933	1.81164e-06	0.000185512	g10066/g13944/g1542/g16109/g178/g23669/g24218/g24290/g248/g31666/g31732/g41581/g42030/g42687/g43390/g54995/g56603/g58196/g59712/g59776/g60133/g60134/g60528/g9462/g971	25	2	23
Biological process	GO:0009074	aromatic amino acid family catabolic process	13/2036	34/23933	1.98077e-06	0.000193172	g19515/g19518/g20355/g25246/g25528/g54240/g54433/g54983/g57981/g57984/g57987/g57989/g63872	13	1	12
Biological process	GO:0005985	sucrose metabolic process	16/2036	50/23933	2.12999e-06	0.000198283	g13783/g14109/g14387/g14425/g15600/g1839/g1840/g23246/g25369/g31210/g41296/g41626/g44130/g55056/g5718/g9975	16	5	11
Biological process	GO:0010104	regulation of ethylene-activated signaling pathway	15/2036	45/23933	2.47685e-06	0.00020624	g13143/g13146/g16261/g16288/g18675/g21675/g25719/g26149/g43417/g50349/g5501/g62599/g62762/g8333/g8401	15	0	15
Biological process	GO:0070297	regulation of phosphorelay signal transduction system	15/2036	45/23933	2.47685e-06	0.00020624	g13143/g13146/g16261/g16288/g18675/g21675/g25719/g26149/g43417/g50349/g5501/g62599/g62762/g8333/g8401	15	0	15
Biological process	GO:1903825	organic acid transmembrane transport	25/2036	107/23933	2.61828e-06	0.00020624	g11681/g12421/g14583/g16711/g17415/g17700/g17702/g20254/g25645/g29833/g30005/g30081/g34192/g34438/g3657/g3878/g41848/g41989/g49909/g53918/g56009/g60437/g61413/g620/g644	25	5	20
Biological process	GO:1905039	carboxylic acid transmembrane transport	25/2036	107/23933	2.61828e-06	0.00020624	g11681/g12421/g14583/g16711/g17415/g17700/g17702/g20254/g25645/g29833/g30005/g30081/g34192/g34438/g3657/g3878/g41848/g41989/g49909/g53918/g56009/g60437/g61413/g620/g644	25	5	20
Biological process	GO:1901698	response to nitrogen compound	63/2036	409/23933	2.95524e-06	0.00022416	g10049/g12556/g13125/g13127/g1386/g14749/g14886/g15581/g15582/g18302/g19564/g19571/g19662/g20291/g21240/g21248/g2168/g24541/g25723/g25912/g26602/g28924/g28993/g29137/g29565/g29668/g29743/g30168/g31036/g31550/g33906/g34312/g34420/g35092/g35554/g37945/g38556/g38746/g41861/g41863/g41923/g42380/g49525/g50295/g50349/g51746/g54255/g55106/g57692/g57880/g58174/g59165/g59680/g60377/g60857/g60922/g61034/g6…	63	19	44
Biological process	GO:1902532	negative regulation of intracellular signal transduction	15/2036	46/23933	3.38722e-06	0.000247751	g13143/g13146/g16261/g16288/g18675/g21675/g25719/g26149/g43417/g50349/g5501/g62599/g62762/g8333/g8401	15	0	15
Biological process	GO:0006558	L-phenylalanine metabolic process	14/2036	41/23933	3.86689e-06	0.00026398	g14228/g19515/g19518/g25246/g4601/g46557/g47681/g54433/g54983/g57981/g57984/g57987/g57989/g63872	14	1	13
Biological process	GO:1902221	erythrose 4-phosphate/phosphoenolpyruvate family amino acid metabolic process	14/2036	41/23933	3.86689e-06	0.00026398	g14228/g19515/g19518/g25246/g4601/g46557/g47681/g54433/g54983/g57981/g57984/g57987/g57989/g63872	14	1	13
Biological process	GO:0006720	isoprenoid metabolic process	59/2036	382/23933	5.52607e-06	0.000365077	g1143/g11630/g12796/g12915/g14125/g14407/g1548/g16803/g16874/g17144/g17260/g18031/g19167/g20318/g21145/g21175/g25553/g25746/g26082/g29126/g29257/g29283/g30619/g31036/g31427/g3436/g34757/g3761/g3785/g38646/g38960/g41764/g42002/g43412/g44940/g44968/g5000/g51010/g51011/g51013/g51014/g52884/g53373/g54334/g54338/g54990/g5548/g57510/g60256/g60684/g60737/g61185/g64048/g6783/g7411/g7563/g767/g953/g9838	59	10	49
Biological process	GO:0009699	phenylpropanoid biosynthetic process	35/2036	185/23933	5.74269e-06	0.000367532	g1100/g11639/g14657/g17073/g17903/g19515/g19518/g19680/g20424/g25246/g25541/g31552/g31556/g34154/g35053/g39254/g41992/g46588/g47074/g50626/g50761/g51716/g54875/g54983/g553/g57981/g57984/g57987/g57989/g58655/g59699/g63758/g63872/g712/g7411	35	2	33
Biological process	GO:0009867	jasmonic acid mediated signaling pathway	32/2036	163/23933	6.3944e-06	0.000396841	g12557/g12615/g13132/g13310/g13640/g1386/g13922/g16068/g18043/g18302/g20374/g2168/g25510/g27600/g28257/g29674/g29758/g31186/g31288/g31615/g35504/g36877/g37258/g37945/g42933/g55036/g55166/g55796/g59134/g60879/g8319/g9633	32	6	26
Biological process	GO:0009751	response to salicylic acid	47/2036	283/23933	7.03251e-06	0.000407855	g10049/g12969/g13033/g13822/g1386/g17861/g18302/g185/g19571/g20355/g23983/g24292/g24446/g25528/g27600/g28257/g28289/g28924/g28993/g29047/g31550/g33906/g33907/g34066/g3436/g35053/g36835/g39254/g41863/g41923/g4815/g51746/g52884/g53797/g53874/g55198/g57627/g58391/g59134/g59207/g60377/g63073/g6380/g7950/g7958/g7995/g980	47	14	33
Biological process	GO:0010243	response to organonitrogen compound	52/2036	325/23933	7.09078e-06	0.000407855	g10049/g12556/g13125/g13127/g1386/g14749/g14886/g18302/g19564/g19571/g19662/g20291/g2168/g24541/g25723/g28924/g28993/g29565/g29668/g29743/g31036/g31550/g33906/g34312/g34420/g35092/g35554/g37945/g38556/g38746/g41861/g41863/g41923/g42380/g49525/g50295/g51746/g54255/g55106/g57880/g58174/g59165/g60377/g60857/g60922/g61034/g63073/g7411/g9339/g9635/g9966/g9997	52	18	34
Biological process	GO:0006865	amino acid transport	23/2036	99/23933	7.18307e-06	0.000407855	g12421/g14583/g16711/g17415/g17700/g17702/g20254/g25645/g30005/g30081/g34192/g3657/g3878/g41848/g41989/g49909/g53918/g56009/g58883/g60437/g61413/g620/g644	23	5	18
Biological process	GO:0008299	isoprenoid biosynthetic process	55/2036	351/23933	7.36847e-06	0.000407855	g1143/g11630/g12796/g12915/g14125/g1548/g16803/g16874/g17144/g17260/g18031/g19167/g20318/g21145/g21175/g25553/g25746/g26082/g29126/g29257/g29283/g30619/g31036/g31427/g3436/g34757/g3761/g3785/g38646/g38960/g42002/g43412/g44940/g44968/g5000/g51010/g51011/g51013/g51014/g52884/g53373/g54334/g54338/g54990/g5548/g57510/g60256/g60737/g61185/g64048/g6783/g7411/g7563/g953/g9838	55	10	45
Biological process	GO:0071395	cellular response to jasmonic acid stimulus	33/2036	175/23933	1.12571e-05	0.000606698	g12557/g12615/g13132/g13310/g13640/g1386/g13922/g16068/g18043/g18302/g20374/g2168/g24003/g25510/g27600/g28257/g29674/g29758/g31186/g31288/g31615/g35504/g36877/g37258/g37945/g42933/g55036/g55166/g55796/g59134/g60879/g8319/g9633	33	7	26
Biological process	GO:0010646	regulation of cell communication	69/2036	481/23933	1.24374e-05	0.00065312	g12557/g12615/g13143/g13146/g13640/g16261/g16288/g17111/g18043/g18675/g19566/g20019/g20374/g20826/g21675/g25510/g25719/g25788/g26140/g26149/g28394/g2873/g28924/g28993/g29438/g29758/g29859/g31186/g31288/g31615/g3436/g35504/g36877/g37258/g38641/g38859/g40412/g41748/g41861/g41863/g41923/g42933/g43270/g43286/g43417/g43457/g4709/g47620/g50349/g51430/g5220/g5433/g5501/g55036/g55166/g58077/g58352/g59766…	69	16	53
Biological process	GO:0009072	aromatic amino acid family metabolic process	27/2036	131/23933	1.30937e-05	0.00066627	g13379/g14228/g19515/g19518/g20355/g23717/g25246/g25524/g25528/g3054/g41748/g42079/g44161/g4601/g46557/g47681/g48726/g49927/g54240/g5438/g54433/g54983/g57981/g57984/g57987/g57989/g63872	27	2	25
Biological process	GO:0009966	regulation of signal transduction	68/2036	473/23933	1.33384e-05	0.00066627	g12557/g12615/g13143/g13146/g13640/g16261/g16288/g17111/g18043/g18675/g19566/g20019/g20374/g20826/g21675/g25510/g25719/g25788/g26149/g28394/g2873/g28924/g28993/g29438/g29758/g29859/g31186/g31288/g31615/g3436/g35504/g36877/g37258/g38641/g38859/g40412/g41748/g41861/g41863/g41923/g42933/g43270/g43286/g43417/g43457/g4709/g47620/g50349/g51430/g5220/g5433/g5501/g55036/g55166/g58077/g58352/g59766/g60377…	68	15	53
Biological process	GO:0023051	regulation of signaling	68/2036	475/23933	1.53363e-05	0.000747826	g12557/g12615/g13143/g13146/g13640/g16261/g16288/g17111/g18043/g18675/g19566/g20019/g20374/g20826/g21675/g25510/g25719/g25788/g26149/g28394/g2873/g28924/g28993/g29438/g29758/g29859/g31186/g31288/g31615/g3436/g35504/g36877/g37258/g38641/g38859/g40412/g41748/g41861/g41863/g41923/g42933/g43270/g43286/g43417/g43457/g4709/g47620/g50349/g51430/g5220/g5433/g5501/g55036/g55166/g58077/g58352/g59766/g60377…	68	15	53
Biological process	GO:0006721	terpenoid metabolic process	49/2036	310/23933	1.79114e-05	0.00085308	g1143/g11630/g12796/g12915/g14407/g1548/g16803/g16874/g17144/g17260/g20318/g21145/g21175/g25553/g26082/g29126/g29257/g29283/g31036/g31427/g3436/g34757/g3761/g3785/g38646/g38960/g41764/g42002/g43412/g44940/g44968/g5000/g51010/g51011/g51013/g51014/g52884/g53373/g54334/g54338/g54990/g5548/g57510/g60256/g60684/g6783/g7563/g767/g953	49	9	40
Biological process	GO:0072330	monocarboxylic acid biosynthetic process	65/2036	451/23933	1.8913e-05	0.000865502	g1386/g14607/g17260/g17270/g19515/g19518/g20377/g20385/g20541/g21456/g23509/g23527/g24724/g25246/g25506/g26200/g26220/g26682/g31013/g31014/g31036/g31490/g32222/g32874/g34097/g3436/g34795/g35053/g39054/g39107/g39254/g39707/g39788/g40236/g41187/g42363/g4314/g43412/g44161/g45357/g4805/g49533/g49940/g49978/g50952/g5181/g5220/g54338/g54796/g54983/g55180/g55653/g57981/g57984/g57987/g57989/g58124/g58139…	65	8	57
Biological process	GO:0006820	anion transport	57/2036	380/23933	1.90174e-05	0.000865502	g11681/g12421/g13273/g13729/g14583/g15581/g15582/g16711/g17415/g17700/g17702/g18447/g20254/g21200/g21240/g21248/g21545/g25645/g26575/g26602/g29565/g29833/g30005/g30081/g30168/g34192/g34263/g34438/g36364/g36463/g3657/g37388/g3878/g39893/g41848/g41989/g41992/g42460/g4415/g49909/g5297/g53918/g56009/g58883/g58894/g59385/g59507/g59947/g59948/g60437/g61053/g61413/g61781/g620/g644/g677/g8613	57	13	44
Biological process	GO:0009311	oligosaccharide metabolic process	26/2036	127/23933	2.12665e-05	0.00094682	g13783/g14109/g14387/g14425/g15600/g1767/g1839/g1840/g23246/g24446/g25369/g31210/g32506/g37631/g38321/g41296/g41626/g42126/g44130/g49876/g55056/g5718/g58125/g58517/g60089/g9975	26	5	21
Biological process	GO:0009063	cellular amino acid catabolic process	20/2036	85/23933	2.28242e-05	0.000994553	g12280/g14135/g19369/g19396/g19515/g19518/g20355/g25246/g25528/g54240/g54433/g54983/g57981/g57984/g57987/g57989/g62593/g63872/g767/g7921	20	1	19
Biological process	GO:0016114	terpenoid biosynthetic process	45/2036	280/23933	2.54367e-05	0.0010853	g1143/g11630/g12796/g12915/g1548/g16803/g16874/g17144/g17260/g20318/g21145/g21175/g25553/g26082/g29126/g29257/g29283/g31036/g31427/g3436/g34757/g3761/g3785/g38646/g38960/g42002/g43412/g44940/g44968/g5000/g51010/g51011/g51013/g51014/g52884/g53373/g54334/g54338/g54990/g5548/g57510/g60256/g6783/g7563/g953	45	9	36
Biological process	GO:0006559	L-phenylalanine catabolic process	10/2036	26/23933	2.88788e-05	0.00118288	g19515/g19518/g25246/g54433/g54983/g57981/g57984/g57987/g57989/g63872	10	1	9
Biological process	GO:1902222	erythrose 4-phosphate/phosphoenolpyruvate family amino acid catabolic process	10/2036	26/23933	2.88788e-05	0.00118288	g19515/g19518/g25246/g54433/g54983/g57981/g57984/g57987/g57989/g63872	10	1	9
Biological process	GO:0009698	phenylpropanoid metabolic process	39/2036	232/23933	3.09325e-05	0.00124215	g1100/g11639/g14657/g17073/g17903/g19515/g19518/g19680/g20424/g25246/g25541/g27170/g31552/g31556/g34154/g35053/g39254/g41992/g46588/g47074/g50626/g50761/g51430/g51716/g51902/g54875/g54983/g553/g57981/g57984/g57987/g57989/g58352/g58655/g59699/g63758/g63872/g712/g7411	39	2	37
Biological process	GO:1901606	alpha-amino acid catabolic process	19/2036	80/23933	3.15444e-05	0.00124236	g12280/g14135/g19369/g19396/g19515/g19518/g20355/g25246/g25528/g54240/g54433/g54983/g57981/g57984/g57987/g57989/g62593/g63872/g7921	19	1	18
Biological process	GO:0006855	drug transmembrane transport	23/2036	109/23933	3.77283e-05	0.00143884	g11931/g15879/g16702/g17082/g20254/g20549/g24678/g25311/g25645/g26079/g29182/g29833/g29842/g3657/g39015/g43645/g4453/g46482/g46485/g50451/g54700/g61034/g8732	23	4	19
Biological process	GO:0016052	carbohydrate catabolic process	52/2036	345/23933	3.79383e-05	0.00143884	g12645/g14015/g18508/g19559/g19797/g19840/g20500/g21456/g23246/g25218/g26522/g27905/g28030/g29341/g31168/g32506/g32874/g35029/g38321/g39707/g39788/g39980/g41626/g42721/g43701/g44130/g4494/g4495/g45357/g46258/g49533/g49978/g50952/g51055/g53515/g54671/g5495/g5496/g55084/g55144/g55256/g58124/g58139/g58517/g59313/g59477/g60033/g60495/g61/g61019/g61205/g8183	52	6	46
Biological process	GO:0009228	thiamine biosynthetic process	9/2036	22/23933	4.09478e-05	0.00149752	g16803/g30831/g44940/g44968/g54990/g6783/g7563/g8172/g9966	9	1	8
Biological process	GO:0042724	thiamine-containing compound biosynthetic process	9/2036	22/23933	4.09478e-05	0.00149752	g16803/g30831/g44940/g44968/g54990/g6783/g7563/g8172/g9966	9	1	8
Biological process	GO:0045454	cell redox homeostasis	34/2036	200/23933	7.69468e-05	0.00276468	g16757/g2123/g21547/g23293/g23299/g24994/g25108/g25907/g28219/g3461/g39235/g39285/g41751/g42489/g47199/g49379/g50413/g50500/g53350/g5442/g5443/g54484/g57569/g58345/g59134/g59342/g752/g8674/g8675/g9489/g9491/g9734/g9749/g9759	34	7	27
Biological process	GO:0019725	cellular homeostasis	61/2036	442/23933	0.000118556	0.00418624	g12555/g16737/g16757/g17637/g17649/g2123/g21547/g23293/g23299/g24446/g24748/g24994/g25108/g25233/g25907/g27278/g28219/g3062/g30659/g31934/g34297/g3461/g39025/g39235/g39285/g41751/g42489/g43966/g47199/g49379/g50413/g50500/g53350/g54255/g5442/g5443/g54484/g54899/g54900/g57569/g57692/g58345/g59134/g59342/g59385/g60042/g60204/g60783/g62271/g63816/g64112/g7006/g7253/g752/g8674/g8675/g9489/g9491/g9734/…	61	15	46
Biological process	GO:0006772	thiamine metabolic process	9/2036	25/23933	0.000132964	0.00449973	g16803/g30831/g44940/g44968/g54990/g6783/g7563/g8172/g9966	9	1	8
Biological process	GO:0042723	thiamine-containing compound metabolic process	9/2036	25/23933	0.000132964	0.00449973	g16803/g30831/g44940/g44968/g54990/g6783/g7563/g8172/g9966	9	1	8
Biological process	GO:0009268	response to pH	8/2036	20/23933	0.000134025	0.00449973	g29884/g31186/g34061/g55036/g55166/g60879/g62576/g7369	8	3	5
Biological process	GO:0042445	hormone metabolic process	60/2036	437/23933	0.000154715	0.00511058	g1041/g12969/g13033/g1386/g1394/g1395/g14407/g17144/g21145/g21175/g24750/g24823/g24835/g24837/g25209/g25519/g25524/g25912/g26082/g26200/g26220/g29094/g29126/g30016/g31013/g31014/g31427/g31713/g34757/g38441/g38859/g38960/g39368/g40236/g41063/g41748/g41764/g41882/g42002/g49927/g5220/g52884/g54334/g5548/g55653/g58412/g58531/g58554/g58667/g59133/g59194/g59766/g60256/g60538/g60684/g60968/g6355/g63758/…	60	18	42
Biological process	GO:0006857	oligopeptide transport	10/2036	31/23933	0.000162434	0.00528038	g13670/g15581/g15582/g18137/g24338/g26118/g4415/g4982/g4983/g59390	10	3	7
Biological process	GO:0006928	movement of cell or subcellular component	27/2036	151/23933	0.000172461	0.00551877	g10066/g13944/g1542/g16109/g178/g23669/g24218/g24290/g248/g31666/g31732/g35501/g41581/g42030/g42687/g43390/g46347/g54995/g56603/g58196/g59712/g59776/g60133/g60134/g60528/g9462/g971	27	4	23
Biological process	GO:0015893	drug transport	24/2036	128/23933	0.00018418	0.00580309	g11931/g15879/g16702/g17082/g20254/g20549/g24678/g25311/g25645/g26079/g29182/g29833/g29842/g3657/g39015/g42460/g43645/g4453/g46482/g46485/g50451/g54700/g61034/g8732	24	5	19
Biological process	GO:0048585	negative regulation of response to stimulus	58/2036	425/23933	0.000231721	0.00719036	g13143/g13146/g15879/g16261/g16288/g17164/g18675/g20826/g21675/g24003/g25719/g25720/g26149/g28394/g2873/g28924/g28993/g29859/g30553/g3062/g3436/g36835/g38859/g401/g40412/g40975/g41863/g41923/g42630/g42933/g43270/g43286/g43417/g46184/g46285/g4709/g47745/g49910/g50155/g50349/g51430/g5501/g58352/g59025/g59766/g60204/g60339/g60377/g60581/g61034/g61768/g61964/g62599/g62762/g63073/g8333/g8401/g9904	58	16	42
Biological process	GO:0046677	response to antibiotic	59/2036	435/23933	0.000242434	0.00741052	g10049/g11639/g12969/g13033/g13127/g13822/g1386/g14222/g17073/g17861/g18302/g185/g19571/g20355/g23246/g23983/g24292/g24446/g25528/g27600/g28257/g28289/g28924/g28993/g29047/g31281/g31550/g33906/g33907/g34066/g3436/g35053/g36835/g38441/g39254/g41626/g41863/g41923/g44130/g4815/g50349/g50433/g51746/g52884/g53797/g53874/g55198/g57627/g58391/g59134/g59207/g60377/g60739/g63073/g6380/g7950/g7958/g7995/g9…	59	19	40
Biological process	GO:0006790	sulfur compound metabolic process	59/2036	436/23933	0.000257642	0.00775956	g1206/g14135/g16057/g16803/g16805/g18387/g19369/g19396/g19690/g24003/g24541/g247/g25223/g25316/g25746/g28924/g28952/g28993/g29053/g29615/g30831/g31128/g31713/g33531/g33561/g35146/g38063/g41863/g41923/g42465/g43270/g43286/g44940/g44968/g46272/g47176/g49533/g49978/g50002/g53985/g54990/g57375/g59147/g59217/g59342/g60377/g60737/g61034/g6355/g63805/g6783/g7563/g767/g7921/g8172/g9734/g9749/g9759/g9966	59	12	47
Biological process	GO:0009968	negative regulation of signal transduction	30/2036	180/23933	0.000281207	0.00811143	g13143/g13146/g16261/g16288/g18675/g20826/g21675/g25719/g26149/g28394/g2873/g29859/g38859/g40412/g42933/g43270/g43286/g43417/g50349/g51430/g5501/g58352/g59766/g61768/g61964/g62599/g62762/g8333/g8401/g9904	30	5	25
Biological process	GO:0010648	negative regulation of cell communication	30/2036	180/23933	0.000281207	0.00811143	g13143/g13146/g16261/g16288/g18675/g20826/g21675/g25719/g26149/g28394/g2873/g29859/g38859/g40412/g42933/g43270/g43286/g43417/g50349/g51430/g5501/g58352/g59766/g61768/g61964/g62599/g62762/g8333/g8401/g9904	30	5	25
Biological process	GO:0023057	negative regulation of signaling	30/2036	180/23933	0.000281207	0.00811143	g13143/g13146/g16261/g16288/g18675/g20826/g21675/g25719/g26149/g28394/g2873/g29859/g38859/g40412/g42933/g43270/g43286/g43417/g50349/g51430/g5501/g58352/g59766/g61768/g61964/g62599/g62762/g8333/g8401/g9904	30	5	25
Biological process	GO:0051090	regulation of DNA-binding transcription factor activity	7/2036	17/23933	0.000288672	0.00821111	g14749/g3062/g33907/g46184/g46285/g60204/g9006	7	0	7
Biological process	GO:0031407	oxylipin metabolic process	14/2036	59/23933	0.000340076	0.00941182	g23509/g23527/g26200/g26220/g31013/g31014/g31490/g34097/g40236/g41187/g4314/g5220/g55180/g58412	14	1	13
Biological process	GO:0031408	oxylipin biosynthetic process	14/2036	59/23933	0.000340076	0.00941182	g23509/g23527/g26200/g26220/g31013/g31014/g31490/g34097/g40236/g41187/g4314/g5220/g55180/g58412	14	1	13
Biological process	GO:0016054	organic acid catabolic process	33/2036	208/23933	0.000365499	0.00977584	g12280/g14135/g14407/g17144/g19369/g19396/g19515/g19518/g20355/g23818/g25246/g25528/g29126/g38960/g41764/g42002/g5220/g54221/g54240/g54433/g54581/g54983/g55653/g57981/g57984/g57987/g57989/g60256/g60684/g62593/g63872/g767/g7921	33	2	31
Biological process	GO:0046395	carboxylic acid catabolic process	33/2036	208/23933	0.000365499	0.00977584	g12280/g14135/g14407/g17144/g19369/g19396/g19515/g19518/g20355/g23818/g25246/g25528/g29126/g38960/g41764/g42002/g5220/g54221/g54240/g54433/g54581/g54983/g55653/g57981/g57984/g57987/g57989/g60256/g60684/g62593/g63872/g767/g7921	33	2	31
Biological process	GO:0043648	dicarboxylic acid metabolic process	20/2036	103/23933	0.000381693	0.00977584	g13124/g13379/g18387/g23717/g25309/g26957/g27075/g3054/g33531/g33561/g42079/g50321/g50322/g54264/g5438/g54614/g54963/g58125/g58795/g63697	20	0	20
Biological process	GO:0032973	amino acid export across plasma membrane	6/2036	13/23933	0.000381869	0.00977584	g14583/g16711/g17700/g17702/g49909/g56009	6	1	5
Biological process	GO:0051289	protein homotetramerization	6/2036	13/23933	0.000381869	0.00977584	g19369/g19396/g20353/g25287/g25531/g59172	6	0	6
Biological process	GO:0140115	export across plasma membrane	6/2036	13/23933	0.000381869	0.00977584	g14583/g16711/g17700/g17702/g49909/g56009	6	1	5
Biological process	GO:0014070	response to organic cyclic compound	62/2036	473/23933	0.000431776	0.010917	g10049/g12969/g13033/g13127/g13822/g1386/g16560/g16757/g17861/g18118/g18302/g185/g19571/g20355/g23983/g24292/g24446/g25528/g27600/g28257/g28289/g28924/g28993/g29047/g31167/g31550/g33906/g33907/g34066/g3436/g35053/g36835/g39254/g41806/g41863/g41882/g41923/g42074/g42077/g42078/g4815/g50316/g51746/g52884/g53797/g53874/g55001/g55198/g57627/g58391/g59134/g59207/g60377/g61034/g63073/g6380/g7950/g7958/g…	62	23	39
Biological process	GO:0042547	cell wall modification involved in multidimensional cell growth	7/2036	18/23933	0.000437783	0.0109339	g11960/g12107/g12645/g17486/g31168/g40874/g54803	7	0	7
Biological process	GO:0098656	anion transmembrane transport	32/2036	202/23933	0.00045692	0.0112744	g11681/g12421/g14583/g16711/g17415/g17700/g17702/g20254/g21545/g25645/g29833/g30005/g30081/g34192/g34438/g3657/g37388/g3878/g39893/g41848/g41989/g49909/g5297/g53918/g56009/g58894/g60437/g61413/g61781/g620/g644/g677	32	8	24
Biological process	GO:0044282	small molecule catabolic process	39/2036	263/23933	0.0004645	0.011325	g12213/g12280/g14135/g14407/g17144/g19369/g19396/g19515/g19518/g19898/g19973/g20355/g23818/g25246/g25427/g25528/g29126/g38960/g41764/g42002/g50952/g5220/g54221/g54240/g54433/g54581/g54983/g55256/g55653/g57981/g57984/g57987/g57989/g60256/g60684/g62593/g63872/g767/g7921	39	4	35
Biological process	GO:0009627	systemic acquired resistance	19/2036	98/23933	0.000538886	0.012984	g13640/g18302/g185/g24750/g28289/g36877/g38995/g52924/g53797/g55198/g57627/g57848/g60232/g61034/g6380/g7950/g7958/g7995/g8826	19	2	17
Biological process	GO:0009862	systemic acquired resistance, salicylic acid mediated signaling pathway	8/2036	24/23933	0.000574702	0.0136859	g18302/g185/g53797/g55198/g6380/g7950/g7958/g7995	8	1	7
Biological process	GO:0042446	hormone biosynthetic process	43/2036	302/23933	0.000588176	0.0138458	g1386/g1394/g1395/g14407/g17144/g21145/g21175/g25519/g25524/g25912/g26082/g26200/g26220/g29094/g29126/g31013/g31014/g31427/g31713/g34757/g38859/g38960/g39368/g40236/g41748/g41764/g41882/g42002/g5220/g52884/g54334/g5548/g55653/g58412/g59194/g59766/g60256/g60538/g60684/g60968/g6355/g63758/g8328	43	11	32
Biological process	GO:0018107	peptidyl-threonine phosphorylation	9/2036	30/23933	0.000630462	0.0143465	g24569/g26538/g34650/g34673/g35271/g35368/g44098/g51741/g58791	9	3	6
Biological process	GO:0018210	peptidyl-threonine modification	9/2036	30/23933	0.000630462	0.0143465	g24569/g26538/g34650/g34673/g35271/g35368/g44098/g51741/g58791	9	3	6
Biological process	GO:1901001	negative regulation of response to salt stress	9/2036	30/23933	0.000630462	0.0143465	g28924/g28993/g3062/g3436/g41863/g41923/g60204/g60339/g60377	9	5	4
Biological process	GO:0044273	sulfur compound catabolic process	7/2036	19/23933	0.000642472	0.0144592	g14135/g19369/g19396/g38063/g61034/g767/g7921	7	0	7
Biological process	GO:0042537	benzene-containing compound metabolic process	16/2036	77/23933	0.000655502	0.014592	g19515/g19518/g20355/g25246/g25528/g35053/g39254/g44161/g49927/g54983/g57981/g57984/g57987/g57989/g58667/g63872	16	2	14
Biological process	GO:0009686	gibberellin biosynthetic process	13/2036	56/23933	0.000686346	0.0149536	g17144/g21145/g21175/g26082/g29126/g31427/g34757/g38960/g42002/g52884/g54334/g5548/g60256	13	5	8
Biological process	GO:0009835	fruit ripening	13/2036	56/23933	0.000686346	0.0149536	g11974/g12121/g18508/g29094/g35029/g39368/g40897/g49928/g5798/g5801/g59194/g59313/g8328	13	5	8
Biological process	GO:1901605	alpha-amino acid metabolic process	50/2036	369/23933	0.000707929	0.0152615	g11786/g12280/g14135/g14228/g16082/g18387/g19369/g19396/g19515/g19518/g20355/g25246/g25309/g25524/g25528/g25809/g26957/g27075/g29053/g29752/g33531/g33561/g35146/g41748/g44735/g44770/g4601/g46557/g47681/g48726/g50321/g50322/g53985/g54240/g54433/g54614/g54963/g54983/g57375/g57981/g57984/g57987/g57989/g58795/g59342/g62593/g63697/g63872/g7702/g7921	50	3	47
Biological process	GO:0009736	cytokinin-activated signaling pathway	20/2036	108/23933	0.000721106	0.0153836	g19589/g20630/g24753/g24894/g25313/g26505/g30557/g35139/g42120/g42128/g47176/g47182/g50002/g50349/g50506/g51430/g58352/g60072/g60090/g670	20	9	11
Biological process	GO:1902531	regulation of intracellular signal transduction	16/2036	78/23933	0.000760549	0.0160578	g13143/g13146/g16261/g16288/g18675/g21675/g25719/g26149/g41861/g43417/g50349/g5501/g62599/g62762/g8333/g8401	16	0	16
Biological process	GO:0034220	ion transmembrane transport	54/2036	410/23933	0.000873702	0.0182586	g10331/g11681/g12421/g13677/g14583/g16711/g17415/g17700/g17702/g20254/g21204/g21545/g25645/g25653/g29833/g30005/g30081/g34192/g34297/g34438/g3611/g3657/g37388/g3878/g39180/g39893/g41848/g41989/g44188/g44217/g47736/g4812/g49909/g5297/g53918/g54899/g54900/g54953/g56009/g58894/g59328/g59436/g59817/g60042/g60437/g60783/g61413/g61781/g620/g644/g677/g7253/g8732/g8733	54	14	40
Biological process	GO:0071368	cellular response to cytokinin stimulus	20/2036	110/23933	0.000916516	0.0189599	g19589/g20630/g24753/g24894/g25313/g26505/g30557/g35139/g42120/g42128/g47176/g47182/g50002/g50349/g50506/g51430/g58352/g60072/g60090/g670	20	9	11
Biological process	GO:0007017	microtubule-based process	36/2036	246/23933	0.000958435	0.0194575	g10066/g13944/g1542/g16109/g1613/g17369/g178/g192/g20583/g23669/g24218/g24246/g24290/g248/g31666/g31732/g38689/g41581/g42030/g42687/g43390/g45701/g4973/g54995/g56603/g58196/g59712/g59776/g60133/g60134/g60528/g6188/g63729/g9462/g971/g9986	36	3	33
Biological process	GO:0010371	regulation of gibberellin biosynthetic process	6/2036	15/23933	0.000959573	0.0194575	g17144/g29126/g38960/g42002/g52884/g60256	6	0	6
Biological process	GO:0009734	auxin-activated signaling pathway	57/2036	441/23933	0.00100711	0.0202211	g1049/g13174/g13217/g13218/g1386/g13867/g15581/g15582/g15862/g16757/g17260/g19020/g19027/g20019/g20966/g21443/g24356/g25788/g26098/g28924/g28993/g30543/g31143/g31196/g34802/g35276/g38362/g38859/g39034/g39035/g39309/g409/g41731/g41748/g41863/g41923/g43396/g43457/g50155/g50316/g51198/g54101/g5453/g5455/g55052/g55796/g58077/g58883/g59133/g59766/g59783/g60377/g61321/g61322/g62966/g8865/g9816	57	16	41
Biological process	GO:0071365	cellular response to auxin stimulus	60/2036	470/23933	0.00102485	0.0203776	g1049/g13174/g13217/g13218/g1386/g13867/g15581/g15582/g15862/g16757/g17260/g18125/g19020/g19027/g20019/g20966/g21443/g24356/g25788/g26098/g28924/g28993/g30543/g31143/g31196/g34802/g35276/g38339/g38362/g38859/g39034/g39035/g39309/g409/g41731/g41748/g41863/g41923/g43396/g43457/g50155/g50316/g51198/g54101/g5453/g5455/g55052/g55796/g58077/g58883/g59133/g59766/g59783/g60377/g61034/g61321/g61322/g62966…	60	18	42
Biological process	GO:0015979	photosynthesis	35/2036	239/23933	0.00110426	0.0217453	g15752/g16281/g19548/g20022/g20638/g23312/g23327/g24312/g25309/g26780/g280/g30619/g30850/g31490/g32551/g32562/g34438/g36554/g37937/g38746/g39043/g42791/g42876/g50500/g53218/g53373/g54350/g55182/g56269/g58191/g58521/g60543/g60730/g932/g9721	35	2	33
Biological process	GO:0071241	cellular response to inorganic substance	23/2036	136/23933	0.00111788	0.021804	g17599/g17754/g21240/g21248/g24107/g25021/g25912/g26602/g29137/g29953/g29960/g30168/g34297/g43226/g47618/g47619/g50349/g5163/g57692/g60042/g60857/g7253/g9798	23	6	17
Biological process	GO:0009685	gibberellin metabolic process	13/2036	59/23933	0.00115667	0.0223477	g17144/g21145/g21175/g26082/g29126/g31427/g34757/g38960/g42002/g52884/g54334/g5548/g60256	13	5	8
Biological process	GO:0010929	positive regulation of auxin mediated signaling pathway	7/2036	21/23933	0.00127418	0.024388	g20019/g25788/g28924/g28993/g41863/g41923/g60377	7	5	2
Biological process	GO:0010410	hemicellulose metabolic process	20/2036	113/23933	0.00129415	0.0245409	g1074/g16528/g19777/g20388/g23481/g28030/g29104/g34731/g4494/g4495/g46294/g51055/g54378/g54657/g54659/g56220/g59477/g59654/g739/g7816	20	7	13
Biological process	GO:0009827	plant-type cell wall modification	9/2036	33/23933	0.0013463	0.0252957	g11960/g12107/g17486/g27129/g27144/g33085/g40874/g43027/g54803	9	0	9
Biological process	GO:0042545	cell wall modification	23/2036	139/23933	0.00150976	0.0281089	g11960/g12107/g12645/g17486/g19797/g19840/g20500/g26522/g27129/g27144/g27905/g31168/g33085/g37388/g40874/g43027/g53515/g54803/g5495/g55084/g55144/g59313/g61034	23	0	23
Biological process	GO:0000272	polysaccharide catabolic process	34/2036	235/23933	0.00158755	0.0292911	g12645/g14015/g18508/g19559/g19797/g19840/g20500/g25218/g26522/g27905/g28030/g29341/g31168/g32506/g35029/g38321/g39980/g42721/g43701/g4494/g4495/g46258/g51055/g53515/g54671/g5495/g5496/g55084/g55144/g59313/g59477/g60495/g61205/g8183	34	3	31
Biological process	GO:0071281	cellular response to iron ion	14/2036	69/23933	0.00177163	0.0323955	g17599/g17754/g24107/g25912/g29953/g29960/g34297/g47618/g47619/g5163/g57692/g60042/g7253/g9798	14	4	10
Biological process	GO:0016102	diterpenoid biosynthetic process	13/2036	62/23933	0.00186939	0.0338806	g17144/g21145/g21175/g26082/g29126/g31427/g34757/g38960/g42002/g52884/g54334/g5548/g60256	13	5	8
Biological process	GO:0051260	protein homooligomerization	11/2036	48/23933	0.00194257	0.0348982	g19369/g19396/g20353/g25287/g25531/g34402/g42995/g55355/g55618/g59172/g60492	11	2	9
Biological process	GO:0019363	pyridine nucleotide biosynthetic process	17/2036	93/23933	0.00202203	0.0360097	g11388/g21456/g32874/g33531/g33561/g34248/g39707/g39788/g45357/g49533/g49978/g50952/g58124/g58139/g60033/g61/g61019	17	2	15
Biological process	GO:0009831	plant-type cell wall modification involved in multidimensional cell growth	5/2036	12/23933	0.00210951	0.0369255	g11960/g12107/g17486/g40874/g54803	5	0	5
Biological process	GO:1901658	glycosyl compound catabolic process	5/2036	12/23933	0.00210951	0.0369255	g14135/g19898/g19973/g61034/g7921	5	0	5
Biological process	GO:0009735	response to cytokinin	36/2036	258/23933	0.00223237	0.0386816	g19589/g20630/g24753/g24894/g25313/g26505/g26957/g27810/g30016/g30557/g34606/g35139/g38710/g42120/g42128/g45357/g47176/g47182/g50002/g50349/g50506/g51191/g51406/g51430/g54718/g5499/g56269/g58139/g58352/g60033/g60072/g60090/g670/g712/g9121/g9465	36	10	26
Biological process	GO:0009414	response to water deprivation	60/2036	486/23933	0.00226756	0.0386816	g13125/g14749/g15581/g15582/g19302/g19358/g19369/g19396/g20291/g23966/g24541/g25036/g26142/g26538/g27214/g29104/g29859/g29909/g30167/g30553/g3436/g35554/g38441/g38746/g42120/g42128/g423/g42813/g42987/g46258/g46297/g46535/g46847/g47258/g47370/g4799/g4800/g49798/g52924/g54439/g54953/g55662/g57832/g57833/g57880/g58174/g58561/g58667/g60072/g60090/g6101/g670/g6980/g7087/g7411/g806/g8183/g8732/g8953/g9…	60	16	44
Biological process	GO:0046351	disaccharide biosynthetic process	10/2036	42/23933	0.00227391	0.0386816	g14109/g1767/g32506/g37631/g38321/g42126/g49876/g5718/g60089/g9975	10	3	7
Biological process	GO:0009593	detection of chemical stimulus	8/2036	29/23933	0.00228539	0.0386816	g18795/g18933/g24646/g32184/g32267/g32268/g352/g53559	8	0	8
Biological process	GO:0009415	response to water	60/2036	490/23933	0.00273403	0.0456339	g13125/g14749/g15581/g15582/g19302/g19358/g19369/g19396/g20291/g23966/g24541/g25036/g26142/g26538/g27214/g29104/g29859/g29909/g30167/g30553/g3436/g35554/g38441/g38746/g42120/g42128/g423/g42813/g42987/g46258/g46297/g46535/g46847/g47258/g47370/g4799/g4800/g49798/g52924/g54439/g54953/g55662/g57832/g57833/g57880/g58174/g58561/g58667/g60072/g60090/g6101/g670/g6980/g7087/g7411/g806/g8183/g8732/g8953/g9…	60	16	44
Biological process	GO:0010411	xyloglucan metabolic process	10/2036	43/23933	0.00274071	0.0456339	g1074/g16528/g19777/g23481/g29104/g54378/g54657/g54659/g56220/g7816	10	4	6
Biological process	GO:0016042	lipid catabolic process	50/2036	395/23933	0.00304307	0.0502597	g14407/g17144/g17637/g17649/g18045/g19537/g19540/g20085/g210/g23818/g26575/g28289/g29126/g29438/g31117/g31232/g32488/g34394/g36364/g37181/g38960/g4095/g4098/g41764/g42002/g4373/g46058/g46219/g5220/g54221/g54581/g54760/g55653/g57627/g57631/g57649/g5807/g59108/g59110/g59116/g59118/g59119/g59120/g60256/g60684/g60818/g60950/g62065/g62214/g64112	50	10	40
Biological process	GO:0010383	cell wall polysaccharide metabolic process	23/2036	148/23933	0.0034587	0.0566673	g1074/g16528/g19777/g20388/g23481/g28030/g29104/g34731/g4494/g4495/g46294/g50626/g50761/g51055/g54378/g54657/g54659/g54875/g56220/g59477/g59654/g739/g7816	23	7	16
Biological process	GO:0006869	lipid transport	21/2036	131/23933	0.00349267	0.0567698	g11613/g12499/g13729/g185/g21103/g21128/g26294/g26575/g34263/g34284/g36364/g44321/g53797/g55198/g57005/g59507/g7134/g7950/g7958/g7995/g8613	21	2	19
Biological process	GO:0010039	response to iron ion	15/2036	82/23933	0.0035861	0.0576884	g17599/g17754/g24107/g25912/g29953/g29960/g34061/g34297/g47618/g47619/g5163/g57692/g60042/g7253/g9798	15	5	10
Biological process	GO:0006835	dicarboxylic acid transport	8/2036	31/23933	0.00360552	0.0576884	g11681/g20254/g25645/g29833/g34192/g3657/g41989/g59385	8	0	8
Biological process	GO:1901615	organic hydroxy compound metabolic process	50/2036	399/23933	0.00372461	0.0591319	g11630/g12969/g13033/g13379/g13668/g14407/g16744/g16874/g17260/g17637/g17649/g23527/g23717/g23869/g25209/g25427/g25519/g25746/g27492/g27493/g30016/g31036/g34097/g3436/g34394/g38366/g41764/g41882/g43412/g43457/g48971/g4952/g49927/g51915/g52138/g53373/g54240/g54338/g5438/g55256/g56381/g56601/g57649/g58667/g59563/g60684/g60737/g63758/g64048/g64112	50	11	39
Biological process	GO:0019344	cysteine biosynthetic process	7/2036	25/23933	0.00389601	0.0613772	g19369/g19396/g29053/g35146/g53985/g57375/g59342	7	1	6
Biological process	GO:0042440	pigment metabolic process	36/2036	267/23933	0.00397113	0.0618465	g11630/g13161/g1326/g1369/g14249/g14255/g1548/g16281/g16874/g24823/g27271/g29257/g29283/g30627/g30628/g30973/g34775/g38203/g38646/g38959/g39213/g39384/g41992/g42615/g42876/g43457/g47774/g53373/g58521/g58531/g59566/g63758/g6549/g7747/g953/g9807	36	6	30
Biological process	GO:0071248	cellular response to metal ion	17/2036	99/23933	0.0039862	0.0618465	g17599/g17754/g24107/g25021/g25912/g29953/g29960/g34297/g43226/g47618/g47619/g5163/g57692/g60042/g60857/g7253/g9798	17	5	12
Biological process	GO:0019359	nicotinamide nucleotide biosynthetic process	16/2036	91/23933	0.00403803	0.0621796	g11388/g21456/g32874/g33531/g33561/g39707/g39788/g45357/g49533/g49978/g50952/g58124/g58139/g60033/g61/g61019	16	1	15
Biological process	GO:0019362	pyridine nucleotide metabolic process	20/2036	125/23933	0.00439516	0.0671737	g11388/g21456/g32874/g33531/g33561/g34248/g39707/g39788/g45357/g47463/g49533/g49978/g50952/g54791/g56269/g58124/g58139/g60033/g61/g61019	20	2	18
Biological process	GO:0009739	response to gibberellin	28/2036	196/23933	0.00466245	0.0707312	g10049/g16560/g26082/g29047/g29221/g30140/g31036/g33906/g33907/g34250/g3436/g36835/g37800/g38641/g38859/g41926/g47176/g49983/g50002/g52884/g5433/g58174/g5831/g59614/g59766/g64099/g9506/g9904	28	9	19
Biological process	GO:0006633	fatty acid biosynthetic process	33/2036	242/23933	0.00474512	0.0714559	g1386/g14607/g17270/g20377/g20385/g20541/g23509/g23527/g24724/g25506/g26200/g26220/g31013/g31014/g31490/g32222/g34097/g34795/g39054/g39107/g40236/g41187/g42363/g4314/g4805/g49940/g5181/g5220/g54796/g55180/g58412/g59174/g7933	33	6	27
Biological process	GO:0071695	anatomical structure maturation	35/2036	261/23933	0.00486492	0.0727252	g11974/g12121/g12658/g16745/g18508/g21201/g26525/g29094/g30418/g33085/g34802/g35029/g38641/g39368/g40897/g41926/g423/g49928/g50451/g55037/g55151/g55355/g56590/g56783/g5798/g5801/g58450/g59194/g59313/g61366/g63729/g6465/g806/g8328/g9085	35	16	19
Biological process	GO:0009409	response to cold	50/2036	406/23933	0.00523496	0.0776681	g12658/g13125/g13822/g14607/g14886/g15567/g17260/g18118/g20388/g24541/g25699/g25726/g2873/g29438/g29565/g29909/g31552/g31556/g32506/g33906/g33907/g34250/g34312/g38321/g38746/g3957/g42120/g42128/g42772/g43096/g46297/g46535/g46847/g4805/g50295/g51716/g53114/g53985/g54439/g55662/g57832/g57833/g60072/g60090/g61385/g61812/g62017/g670/g806/g9635	50	15	35
Biological process	GO:0009640	photomorphogenesis	20/2036	127/23933	0.00527142	0.0776681	g1049/g28945/g29023/g30973/g35276/g39309/g401/g42630/g48089/g49841/g55106/g56380/g56381/g56428/g58077/g58340/g59046/g60524/g60922/g61768	20	6	14
Biological process	GO:0016115	terpenoid catabolic process	8/2036	33/23933	0.00544933	0.0789839	g14407/g17144/g29126/g38960/g41764/g42002/g60256/g60684	8	0	8
Biological process	GO:0043455	regulation of secondary metabolic process	12/2036	62/23933	0.00547642	0.0789839	g17144/g20424/g24003/g29126/g3436/g38960/g41992/g42002/g51430/g52884/g58352/g60256	12	1	11
Biological process	GO:0055081	anion homeostasis	12/2036	62/23933	0.00547642	0.0789839	g12847/g14583/g17637/g17649/g20254/g25379/g25645/g3657/g52884/g56009/g58653/g64112	12	3	9
Biological process	GO:0009809	lignin biosynthetic process	16/2036	94/23933	0.00559253	0.0800944	g1100/g14657/g17073/g17903/g20424/g25541/g31552/g31556/g41992/g46588/g47074/g51716/g553/g58655/g63758/g712	16	0	16
Biological process	GO:1901657	glycosyl compound metabolic process	36/2036	273/23933	0.00568285	0.0808228	g1206/g12899/g14135/g19898/g19973/g20318/g24003/g247/g25316/g25553/g28924/g28993/g29366/g3761/g3785/g41863/g41923/g42465/g42759/g43270/g43286/g46272/g47176/g50002/g53927/g55182/g57404/g57510/g58619/g58629/g59147/g60377/g61034/g63147/g63869/g7921	36	13	23
Biological process	GO:0044264	cellular polysaccharide metabolic process	43/2036	341/23933	0.00606665	0.0856863	g1074/g12645/g12899/g14373/g16528/g18508/g19559/g19777/g20388/g20541/g20790/g23481/g29104/g29341/g32506/g34731/g35029/g38321/g39116/g39267/g42632/g43027/g46258/g46294/g49798/g50626/g50761/g53594/g54378/g54657/g54659/g54735/g54875/g5496/g55556/g56220/g59654/g60495/g61205/g739/g7816/g8183/g9975	43	10	33
Biological process	GO:0044275	cellular carbohydrate catabolic process	16/2036	95/23933	0.00620718	0.0870706	g12645/g18508/g19559/g23246/g29341/g32506/g35029/g38321/g41626/g44130/g46258/g5496/g55256/g60495/g61205/g8183	16	2	14
Biological process	GO:0006006	glucose metabolic process	9/2036	41/23933	0.00659678	0.0919062	g32551/g32562/g39707/g39788/g45357/g50952/g54791/g58139/g60258	9	1	8
Biological process	GO:0051262	protein tetramerization	6/2036	21/23933	0.00667592	0.0923804	g19369/g19396/g20353/g25287/g25531/g59172	6	0	6
Biological process	GO:0010038	response to metal ion	57/2036	482/23933	0.00709199	0.0966151	g10049/g13125/g1386/g14373/g15335/g17073/g17599/g17754/g19662/g20541/g24107/g25021/g25912/g26957/g28924/g28993/g29884/g29953/g29960/g33906/g33907/g34061/g34297/g34606/g36835/g38063/g38115/g41863/g41923/g43226/g4415/g45357/g46258/g47618/g47619/g50413/g5163/g54614/g55653/g57076/g57082/g57569/g57692/g57893/g58139/g58795/g60042/g60258/g60377/g60857/g62576/g688/g7253/g7369/g9339/g9635/g9798	57	17	40
Biological process	GO:0031098	stress-activated protein kinase signaling cascade	12/2036	64/23933	0.00711445	0.0966151	g1104/g13057/g19842/g29911/g31713/g34312/g41861/g51955/g6355/g6380/g748/g9931	12	3	9
Biological process	GO:0015837	amine transport	4/2036	10/23933	0.00721613	0.0966151	g16711/g17700/g17702/g49909	4	1	3
Biological process	GO:0015908	fatty acid transport	4/2036	10/23933	0.00721613	0.0966151	g26575/g34263/g36364/g59507	4	1	3
Biological process	GO:0016101	diterpenoid metabolic process	13/2036	72/23933	0.00721783	0.0966151	g17144/g21145/g21175/g26082/g29126/g31427/g34757/g38960/g42002/g52884/g54334/g5548/g60256	13	5	8
Biological process	GO:0072525	pyridine-containing compound biosynthetic process	17/2036	105/23933	0.00730441	0.0971391	g11388/g21456/g32874/g33531/g33561/g34248/g39707/g39788/g45357/g49533/g49978/g50952/g58124/g58139/g60033/g61/g61019	17	2	15
Biological process	GO:0016143	S-glycoside metabolic process	16/2036	97/23933	0.00759989	0.0991374	g24003/g247/g25316/g28924/g28993/g41863/g41923/g42465/g43270/g43286/g46272/g47176/g50002/g59147/g60377/g61034	16	8	8
Biological process	GO:0019757	glycosinolate metabolic process	16/2036	97/23933	0.00759989	0.0991374	g24003/g247/g25316/g28924/g28993/g41863/g41923/g42465/g43270/g43286/g46272/g47176/g50002/g59147/g60377/g61034	16	8	8
Biological process	GO:0019760	glucosinolate metabolic process	16/2036	97/23933	0.00759989	0.0991374	g24003/g247/g25316/g28924/g28993/g41863/g41923/g42465/g43270/g43286/g46272/g47176/g50002/g59147/g60377/g61034	16	8	8
Biological process	GO:0046496	nicotinamide nucleotide metabolic process	19/2036	123/23933	0.00790965	0.102221	g11388/g21456/g32874/g33531/g33561/g39707/g39788/g45357/g47463/g49533/g49978/g50952/g54791/g56269/g58124/g58139/g60033/g61/g61019	19	1	18
Biological process	GO:0008300	isoprenoid catabolic process	8/2036	35/23933	0.0079361	0.102221	g14407/g17144/g29126/g38960/g41764/g42002/g60256/g60684	8	0	8
Biological process	GO:0072524	pyridine-containing compound metabolic process	20/2036	132/23933	0.00810393	0.10373	g11388/g21456/g32874/g33531/g33561/g34248/g39707/g39788/g45357/g47463/g49533/g49978/g50952/g54791/g56269/g58124/g58139/g60033/g61/g61019	20	2	18
Biological process	GO:0010876	lipid localization	21/2036	142/23933	0.0089138	0.113388	g11613/g12499/g13729/g185/g21103/g21128/g26294/g26575/g34263/g34284/g36364/g44321/g53797/g55198/g57005/g59507/g7134/g7950/g7958/g7995/g8613	21	2	19
Biological process	GO:0045490	pectin catabolic process	16/2036	99/23933	0.00923232	0.116715	g14015/g19797/g19840/g20500/g25218/g26522/g27905/g31168/g39980/g42721/g43701/g53515/g5495/g55084/g55144/g59313	16	0	16
Biological process	GO:0016051	carbohydrate biosynthetic process	50/2036	419/23933	0.00943766	0.118124	g1074/g14109/g14373/g16744/g1767/g20388/g20541/g20790/g23312/g23327/g24003/g26682/g32506/g32551/g32562/g34731/g37631/g38321/g39116/g39267/g39707/g39788/g42126/g42632/g43027/g45357/g46294/g49798/g49799/g49876/g50626/g50643/g50761/g53159/g53594/g54735/g54875/g55256/g55556/g56269/g5718/g58125/g58139/g58748/g59654/g60089/g60258/g60730/g739/g9975	50	12	38
Biological process	GO:0043650	dicarboxylic acid biosynthetic process	8/2036	36/23933	0.00945915	0.118124	g13379/g23717/g26957/g3054/g42079/g5438/g54963/g58125	8	0	8
Biological process	GO:0010928	regulation of auxin mediated signaling pathway	10/2036	51/23933	0.00981761	0.121857	g20019/g25788/g28924/g28993/g41748/g41863/g41923/g43457/g58077/g60377	10	6	4
Biological process	GO:0010558	negative regulation of macromolecule biosynthetic process	50/2036	421/23933	0.0102845	0.126542	g10186/g12377/g12832/g13174/g13217/g13583/g13640/g13867/g17497/g18302/g18834/g2316/g24292/g25092/g25936/g27665/g29570/g29758/g31186/g31288/g31550/g31615/g33906/g34420/g35504/g36835/g37258/g38746/g388/g41806/g4531/g4532/g47745/g48393/g48394/g49910/g51746/g52884/g53661/g55036/g55106/g55166/g55828/g58207/g59605/g59927/g60879/g60922/g9121/g9594	50	8	42
Biological process	GO:0006066	alcohol metabolic process	24/2036	171/23933	0.0103186	0.126542	g11630/g14407/g16744/g16874/g17260/g17637/g17649/g23869/g31036/g3436/g38366/g41764/g43412/g48971/g51915/g52138/g54338/g55256/g56381/g57649/g59563/g60684/g64048/g64112	24	6	18
Biological process	GO:0009061	anaerobic respiration	4/2036	11/23933	0.0105837	0.127771	g18795/g18933/g24646/g63993	4	0	4
Biological process	GO:0031327	negative regulation of cellular biosynthetic process	52/2036	442/23933	0.0107377	0.127771	g10186/g12377/g12832/g13174/g13217/g13583/g13640/g13867/g17497/g18302/g18834/g2316/g24292/g25092/g25936/g27665/g29570/g29758/g31186/g31288/g31550/g31615/g33906/g34420/g34795/g35504/g36835/g37258/g38746/g388/g41806/g41882/g4531/g4532/g47745/g48393/g48394/g49910/g51746/g52884/g53661/g55036/g55106/g55166/g55828/g58207/g59605/g59927/g60879/g60922/g9121/g9594	52	8	44
Biological process	GO:1901361	organic cyclic compound catabolic process	51/2036	433/23933	0.0111957	0.127771	g12213/g1326/g14135/g16281/g17903/g19515/g19518/g19898/g19973/g20355/g21337/g21456/g25246/g25472/g25528/g25541/g27600/g28257/g32874/g34394/g34775/g38203/g39707/g39788/g43189/g4532/g45357/g46302/g47774/g49037/g49533/g49978/g50946/g50952/g54240/g54433/g54983/g57981/g57984/g57987/g57989/g58124/g58139/g58558/g60033/g61/g61019/g61034/g63872/g7747/g7921	51	7	44
Biological process	GO:0006096	glycolytic process	13/2036	76/23933	0.0113398	0.127771	g21456/g32874/g39707/g39788/g45357/g49533/g49978/g50952/g58124/g58139/g60033/g61/g61019	13	1	12
Biological process	GO:0006165	nucleoside diphosphate phosphorylation	13/2036	76/23933	0.0113398	0.127771	g21456/g32874/g39707/g39788/g45357/g49533/g49978/g50952/g58124/g58139/g60033/g61/g61019	13	1	12
Biological process	GO:0006757	ATP generation from ADP	13/2036	76/23933	0.0113398	0.127771	g21456/g32874/g39707/g39788/g45357/g49533/g49978/g50952/g58124/g58139/g60033/g61/g61019	13	1	12
Biological process	GO:0009135	purine nucleoside diphosphate metabolic process	13/2036	76/23933	0.0113398	0.127771	g21456/g32874/g39707/g39788/g45357/g49533/g49978/g50952/g58124/g58139/g60033/g61/g61019	13	1	12
Biological process	GO:0009179	purine ribonucleoside diphosphate metabolic process	13/2036	76/23933	0.0113398	0.127771	g21456/g32874/g39707/g39788/g45357/g49533/g49978/g50952/g58124/g58139/g60033/g61/g61019	13	1	12
Biological process	GO:0009185	ribonucleoside diphosphate metabolic process	13/2036	76/23933	0.0113398	0.127771	g21456/g32874/g39707/g39788/g45357/g49533/g49978/g50952/g58124/g58139/g60033/g61/g61019	13	1	12
Biological process	GO:0042866	pyruvate biosynthetic process	13/2036	76/23933	0.0113398	0.127771	g21456/g32874/g39707/g39788/g45357/g49533/g49978/g50952/g58124/g58139/g60033/g61/g61019	13	1	12
Biological process	GO:0046031	ADP metabolic process	13/2036	76/23933	0.0113398	0.127771	g21456/g32874/g39707/g39788/g45357/g49533/g49978/g50952/g58124/g58139/g60033/g61/g61019	13	1	12
Biological process	GO:0006094	gluconeogenesis	5/2036	17/23933	0.0115105	0.127771	g39707/g39788/g45357/g58139/g60258	5	0	5
Biological process	GO:0007135	meiosis II	5/2036	17/23933	0.0115105	0.127771	g30685/g30821/g47780/g5268/g59010	5	0	5
Biological process	GO:0015800	acidic amino acid transport	5/2036	17/23933	0.0115105	0.127771	g20254/g25645/g34192/g3657/g41989	5	0	5
Biological process	GO:0061983	meiosis II cell cycle process	5/2036	17/23933	0.0115105	0.127771	g30685/g30821/g47780/g5268/g59010	5	0	5
Biological process	GO:0009312	oligosaccharide biosynthetic process	11/2036	60/23933	0.0115243	0.127771	g14109/g1767/g32506/g37631/g38321/g42126/g49876/g5718/g58125/g60089/g9975	11	3	8
Biological process	GO:1902679	negative regulation of RNA biosynthetic process	45/2036	374/23933	0.0115418	0.127771	g10186/g12377/g12832/g13174/g13217/g13583/g13640/g13867/g17497/g18302/g18834/g2316/g24292/g25092/g25936/g27665/g29570/g29758/g31186/g31288/g31550/g31615/g33906/g34420/g35504/g36835/g37258/g38746/g41806/g4531/g47745/g48393/g48394/g49910/g51746/g52884/g55036/g55106/g55166/g55828/g58207/g60879/g60922/g9121/g9594	45	7	38
Biological process	GO:1903507	negative regulation of nucleic acid-templated transcription	45/2036	374/23933	0.0115418	0.127771	g10186/g12377/g12832/g13174/g13217/g13583/g13640/g13867/g17497/g18302/g18834/g2316/g24292/g25092/g25936/g27665/g29570/g29758/g31186/g31288/g31550/g31615/g33906/g34420/g35504/g36835/g37258/g38746/g41806/g4531/g47745/g48393/g48394/g49910/g51746/g52884/g55036/g55106/g55166/g55828/g58207/g60879/g60922/g9121/g9594	45	7	38
Biological process	GO:0006833	water transport	9/2036	45/23933	0.0122832	0.134524	g25036/g25653/g3611/g39389/g47776/g54953/g61049/g62127/g8732	9	2	7
Biological process	GO:0042044	fluid transport	9/2036	45/23933	0.0122832	0.134524	g25036/g25653/g3611/g39389/g47776/g54953/g61049/g62127/g8732	9	2	7
Biological process	GO:0072527	pyrimidine-containing compound metabolic process	17/2036	111/23933	0.0125556	0.135988	g12899/g16803/g19898/g19973/g30831/g44940/g44968/g50946/g53927/g54990/g57284/g58558/g63746/g6783/g7563/g8172/g9966	17	2	15
Biological process	GO:0046939	nucleotide phosphorylation	13/2036	77/23933	0.0126106	0.135988	g21456/g32874/g39707/g39788/g45357/g49533/g49978/g50952/g58124/g58139/g60033/g61/g61019	13	1	12
Biological process	GO:0009890	negative regulation of biosynthetic process	52/2036	446/23933	0.0126392	0.135988	g10186/g12377/g12832/g13174/g13217/g13583/g13640/g13867/g17497/g18302/g18834/g2316/g24292/g25092/g25936/g27665/g29570/g29758/g31186/g31288/g31550/g31615/g33906/g34420/g34795/g35504/g36835/g37258/g38746/g388/g41806/g41882/g4531/g4532/g47745/g48393/g48394/g49910/g51746/g52884/g53661/g55036/g55106/g55166/g55828/g58207/g59605/g59927/g60879/g60922/g9121/g9594	52	8	44
Biological process	GO:0006091	generation of precursor metabolites and energy	39/2036	317/23933	0.0126824	0.135988	g13124/g15752/g18795/g18933/g19548/g20638/g21456/g24646/g25309/g26780/g280/g30850/g31490/g32874/g33531/g33561/g36554/g39043/g39707/g39788/g42791/g45357/g46258/g49533/g49978/g50500/g50952/g51100/g54264/g54350/g55556/g58124/g58139/g60033/g60543/g61/g61019/g63993/g932	39	1	38
Biological process	GO:0044092	negative regulation of molecular function	10/2036	53/23933	0.0128394	0.13693	g13511/g20806/g3062/g33907/g36835/g46184/g46285/g59605/g60204/g7794	10	1	9
Biological process	GO:0044247	cellular polysaccharide catabolic process	12/2036	69/23933	0.0129041	0.13693	g12645/g18508/g19559/g29341/g32506/g35029/g38321/g46258/g5496/g60495/g61205/g8183	12	0	12
Biological process	GO:1902170	cellular response to reactive nitrogen species	8/2036	38/23933	0.0131422	0.138739	g21240/g21248/g25912/g26602/g29137/g30168/g50349/g57692	8	1	7
Biological process	GO:0098739	import across plasma membrane	6/2036	24/23933	0.0132917	0.139597	g20254/g25645/g3657/g54899/g54900/g60783	6	2	4
Biological process	GO:0006534	cysteine metabolic process	7/2036	31/23933	0.0136085	0.142195	g19369/g19396/g29053/g35146/g53985/g57375/g59342	7	1	6
Biological process	GO:0009132	nucleoside diphosphate metabolic process	13/2036	78/23933	0.0139884	0.145422	g21456/g32874/g39707/g39788/g45357/g49533/g49978/g50952/g58124/g58139/g60033/g61/g61019	13	1	12
Biological process	GO:0009313	oligosaccharide catabolic process	4/2036	12/23933	0.0148208	0.150476	g23246/g41626/g44130/g58517	4	2	2
Biological process	GO:0010447	response to acidic pH	4/2036	12/23933	0.0148208	0.150476	g29884/g34061/g62576/g7369	4	3	1
Biological process	GO:0046503	glycerolipid catabolic process	4/2036	12/23933	0.0148208	0.150476	g17637/g17649/g57649/g64112	4	2	2
Biological process	GO:0019319	hexose biosynthetic process	5/2036	18/23933	0.0148418	0.150476	g39707/g39788/g45357/g58139/g60258	5	0	5
Biological process	GO:0043090	amino acid import	5/2036	18/23933	0.0148418	0.150476	g14583/g20254/g25645/g3657/g56009	5	0	5
Biological process	GO:0051865	protein autoubiquitination	8/2036	39/23933	0.0153329	0.154688	g12556/g12557/g12615/g20291/g35554/g42800/g57880/g8953	8	2	6
Biological process	GO:0044272	sulfur compound biosynthetic process	26/2036	196/23933	0.0156635	0.157249	g1206/g16803/g18387/g19369/g19396/g24003/g24541/g25223/g29053/g30831/g31713/g35146/g44940/g44968/g49533/g49978/g53985/g54990/g57375/g59342/g6355/g63805/g6783/g7563/g8172/g9966	26	4	22
Biological process	GO:0045934	negative regulation of nucleobase-containing compound metabolic process	49/2036	422/23933	0.0162044	0.158026	g10186/g12377/g12832/g13174/g13217/g13583/g13640/g13867/g17497/g18302/g18834/g2316/g23959/g24292/g25092/g25936/g27665/g29570/g29758/g31186/g31288/g31550/g31615/g33906/g34420/g35504/g36835/g37258/g38746/g41806/g4531/g47745/g48393/g48394/g49910/g51746/g52884/g53661/g55036/g55106/g55166/g55828/g58207/g59605/g59927/g60879/g60922/g9121/g9594	49	7	42
Biological process	GO:0019439	aromatic compound catabolic process	48/2036	412/23933	0.016251	0.158026	g1326/g14135/g16281/g17903/g19515/g19518/g19898/g19973/g20355/g21337/g21456/g25246/g25472/g25528/g25541/g27600/g28257/g32874/g34775/g38203/g39707/g39788/g43189/g4532/g45357/g46302/g47774/g49037/g49533/g49978/g50952/g54240/g54433/g54983/g57981/g57984/g57987/g57989/g58124/g58139/g58558/g60033/g61/g61019/g61034/g63872/g7747/g7921	48	6	42
Biological process	GO:0019253	reductive pentose-phosphate cycle	6/2036	25/23933	0.0162588	0.158026	g23312/g23327/g32551/g32562/g56269/g60730	6	0	6
Biological process	GO:0019685	photosynthesis, dark reaction	6/2036	25/23933	0.0162588	0.158026	g23312/g23327/g32551/g32562/g56269/g60730	6	0	6
Biological process	GO:0072348	sulfur compound transport	6/2036	25/23933	0.0162588	0.158026	g13273/g29833/g4415/g59947/g59948/g677	6	0	6
Biological process	GO:0009166	nucleotide catabolic process	14/2036	88/23933	0.016281	0.158026	g21456/g32874/g39707/g39788/g45357/g49533/g49978/g50952/g58124/g58139/g58558/g60033/g61/g61019	14	1	13
Biological process	GO:0009682	induced systemic resistance	14/2036	88/23933	0.016281	0.158026	g1386/g15567/g18302/g20714/g2168/g2711/g28289/g37945/g38561/g38562/g57627/g59806/g61812/g62017	14	3	11
Biological process	GO:0009814	defense response, incompatible interaction	39/2036	323/23933	0.0168	0.162295	g13640/g17111/g18302/g185/g19571/g20355/g23983/g24750/g25528/g28289/g31168/g34606/g36877/g37622/g38995/g42933/g45992/g46002/g47774/g52924/g53797/g54071/g54967/g55198/g57038/g57627/g57848/g59025/g60232/g60258/g61034/g61366/g6380/g7750/g7950/g7958/g7995/g8826/g9006	39	10	29
Biological process	GO:0051253	negative regulation of RNA metabolic process	45/2036	383/23933	0.0170166	0.162408	g10186/g12377/g12832/g13174/g13217/g13583/g13640/g13867/g17497/g18302/g18834/g2316/g24292/g25092/g25936/g27665/g29570/g29758/g31186/g31288/g31550/g31615/g33906/g34420/g35504/g36835/g37258/g38746/g41806/g4531/g47745/g48393/g48394/g49910/g51746/g52884/g55036/g55106/g55166/g55828/g58207/g60879/g60922/g9121/g9594	45	7	38
Biological process	GO:0021700	developmental maturation	35/2036	284/23933	0.0170469	0.162408	g11974/g12121/g12658/g16745/g18508/g21201/g26525/g29094/g30418/g33085/g34802/g35029/g38641/g39368/g40897/g41926/g423/g49928/g50451/g55037/g55151/g55355/g56590/g56783/g5798/g5801/g58450/g59194/g59313/g61366/g63729/g6465/g806/g8328/g9085	35	16	19
Biological process	GO:0045488	pectin metabolic process	25/2036	188/23933	0.0170506	0.162408	g14015/g17371/g19797/g19840/g20500/g25218/g26522/g27905/g31168/g39980/g42721/g43027/g43701/g49799/g50626/g50643/g50761/g53159/g53515/g54875/g5495/g55084/g55144/g58748/g59313	25	3	22
Biological process	GO:0006073	cellular glucan metabolic process	32/2036	255/23933	0.0172082	0.162408	g1074/g12645/g12899/g14373/g16528/g18508/g19559/g19777/g20541/g20790/g23481/g29104/g32506/g35029/g38321/g39267/g42632/g43027/g46258/g49798/g53594/g54378/g54657/g54659/g54735/g5496/g55556/g56220/g61205/g7816/g8183/g9975	32	8	24
Biological process	GO:0044042	glucan metabolic process	32/2036	255/23933	0.0172082	0.162408	g1074/g12645/g12899/g14373/g16528/g18508/g19559/g19777/g20541/g20790/g23481/g29104/g32506/g35029/g38321/g39267/g42632/g43027/g46258/g49798/g53594/g54378/g54657/g54659/g54735/g5496/g55556/g56220/g61205/g7816/g8183/g9975	32	8	24
Biological process	GO:0042737	drug catabolic process	38/2036	315/23933	0.0183051	0.171967	g12213/g14015/g16957/g19515/g19518/g19797/g19840/g20424/g20500/g23950/g25218/g25246/g26522/g27905/g28561/g28564/g31168/g34466/g39643/g39980/g42721/g43701/g46302/g50946/g53515/g54433/g5495/g54983/g55084/g55144/g57719/g57981/g57984/g57987/g57989/g59313/g62593/g63872	38	1	37
Biological process	GO:0010162	seed dormancy process	9/2036	48/23933	0.0184946	0.172168	g16745/g21201/g41926/g55037/g55151/g58450/g61366/g6465/g9085	9	5	4
Biological process	GO:0022611	dormancy process	9/2036	48/23933	0.0184946	0.172168	g16745/g21201/g41926/g55037/g55151/g58450/g61366/g6465/g9085	9	5	4
Biological process	GO:0016138	glycoside biosynthetic process	7/2036	33/23933	0.0190584	0.176613	g20318/g25553/g3761/g3785/g57510/g58619/g58629	7	1	6
Biological process	GO:0008202	steroid metabolic process	21/2036	153/23933	0.0197252	0.18197	g11630/g12969/g13033/g13668/g14407/g14657/g16874/g23527/g25209/g25519/g25746/g30016/g34097/g34394/g41764/g41882/g4952/g56601/g5788/g60684/g60737	21	3	18
Biological process	GO:0010222	stem vascular tissue pattern formation	4/2036	13/23933	0.0199904	0.183589	g34263/g38488/g59507/g60691	4	0	4
Biological process	GO:0080167	response to karrikin	18/2036	126/23933	0.0203735	0.185592	g16430/g18043/g20374/g20740/g20806/g25092/g25510/g25517/g28945/g29023/g34438/g34802/g38441/g58517/g59947/g59948/g8186/g9422	18	1	17
Biological process	GO:0051259	protein complex oligomerization	11/2036	65/23933	0.0204254	0.185592	g19369/g19396/g20353/g25287/g25531/g34402/g42995/g55355/g55618/g59172/g60492	11	2	9
Biological process	GO:1901617	organic hydroxy compound biosynthetic process	30/2036	239/23933	0.0204804	0.185592	g11630/g13668/g14407/g16744/g16874/g17260/g25519/g25746/g27492/g27493/g31036/g3436/g38366/g41764/g41882/g43412/g43457/g48971/g4952/g51915/g52138/g53373/g54240/g54338/g56381/g56601/g60684/g60737/g63758/g64048	30	3	27
Biological process	GO:0007346	regulation of mitotic cell cycle	20/2036	145/23933	0.0214253	0.193299	g1041/g1104/g13057/g17369/g19842/g26893/g29911/g30821/g31713/g34312/g40610/g41861/g50927/g51955/g57703/g61366/g6355/g6380/g748/g9931	20	5	15
Biological process	GO:0016137	glycoside metabolic process	7/2036	34/23933	0.0222871	0.200193	g20318/g25553/g3761/g3785/g57510/g58619/g58629	7	1	6
Biological process	GO:0009073	aromatic amino acid family biosynthetic process	13/2036	83/23933	0.0226722	0.202763	g13379/g14228/g23717/g25524/g3054/g41748/g42079/g44161/g4601/g46557/g47681/g48726/g5438	13	0	13
Biological process	GO:0045493	xylan catabolic process	5/2036	20/23933	0.023304	0.206551	g28030/g4494/g4495/g51055/g59477	5	2	3
Biological process	GO:0071483	cellular response to blue light	5/2036	20/23933	0.023304	0.206551	g20638/g41799/g55106/g60922/g932	5	0	5
Biological process	GO:0009817	defense response to fungus, incompatible interaction	10/2036	58/23933	0.0233983	0.206551	g28289/g34606/g36877/g42933/g54071/g54967/g57627/g60258/g61034/g61366	10	4	6
Biological process	GO:0009664	plant-type cell wall organization	23/2036	175/23933	0.0242576	0.213217	g11960/g12107/g1306/g16957/g17371/g17486/g20283/g24659/g25447/g27129/g27144/g33085/g39643/g40874/g42794/g43027/g4923/g50626/g50761/g54803/g54875/g62127/g9889	23	2	21
Biological process	GO:0046148	pigment biosynthetic process	28/2036	223/23933	0.0244053	0.213598	g11630/g13161/g1369/g14249/g14255/g1548/g16874/g24823/g27271/g29257/g29283/g30627/g30628/g38646/g38959/g39213/g39384/g41992/g42876/g43457/g53373/g58521/g58531/g59566/g63758/g6549/g953/g9807	28	4	24
Biological process	GO:0009637	response to blue light	14/2036	93/23933	0.0253265	0.220718	g1386/g20212/g20638/g23682/g25696/g38154/g41215/g41799/g47203/g5105/g55106/g58077/g60922/g932	14	4	10
Biological process	GO:0009088	threonine biosynthetic process	4/2036	14/23933	0.0261399	0.223994	g18387/g25809/g27075/g63697	4	0	4
Biological process	GO:0009094	L-phenylalanine biosynthetic process	4/2036	14/23933	0.0261399	0.223994	g14228/g4601/g46557/g47681	4	0	4
Biological process	GO:0072529	pyrimidine-containing compound catabolic process	4/2036	14/23933	0.0261399	0.223994	g19898/g19973/g50946/g58558	4	0	4
Biological process	GO:1902223	erythrose 4-phosphate/phosphoenolpyruvate family amino acid biosynthetic process	4/2036	14/23933	0.0261399	0.223994	g14228/g4601/g46557/g47681	4	0	4
Biological process	GO:0015718	monocarboxylic acid transport	9/2036	51/23933	0.0267173	0.227988	g13729/g26575/g34263/g34438/g36364/g36463/g42460/g59507/g8613	9	3	6
Biological process	GO:0010393	galacturonan metabolic process	25/2036	196/23933	0.0270835	0.230153	g14015/g17371/g19797/g19840/g20500/g25218/g26522/g27905/g31168/g39980/g42721/g43027/g43701/g49799/g50626/g50643/g50761/g53159/g53515/g54875/g5495/g55084/g55144/g58748/g59313	25	3	22
Biological process	GO:1901292	nucleoside phosphate catabolic process	14/2036	94/23933	0.0275111	0.232822	g21456/g32874/g39707/g39788/g45357/g49533/g49978/g50952/g58124/g58139/g58558/g60033/g61/g61019	14	1	13
Biological process	GO:0019684	photosynthesis, light reaction	15/2036	103/23933	0.0276726	0.233225	g15752/g19548/g20638/g25309/g26780/g280/g30850/g31490/g36554/g39043/g42791/g50500/g54350/g60543/g932	15	0	15
Biological process	GO:0006733	oxidoreduction coenzyme metabolic process	20/2036	149/23933	0.0278318	0.233605	g11388/g21456/g32874/g33531/g33561/g34248/g39707/g39788/g45357/g47463/g49533/g49978/g50952/g54791/g56269/g58124/g58139/g60033/g61/g61019	20	2	18
Biological process	GO:0009251	glucan catabolic process	10/2036	60/23933	0.029012	0.242517	g12645/g18508/g19559/g32506/g35029/g38321/g46258/g5496/g61205/g8183	10	0	10
Biological process	GO:0090698	post-embryonic plant morphogenesis	32/2036	266/23933	0.0294065	0.243906	g1008/g10099/g12194/g13174/g13217/g13867/g19842/g20212/g24823/g25519/g25696/g34263/g34947/g36835/g38373/g38488/g4095/g41992/g43482/g54135/g54284/g5433/g54639/g58531/g59507/g60691/g62127/g63729/g8186/g8886/g9506/g9508	32	7	25
Biological process	GO:0071669	plant-type cell wall organization or biogenesis	39/2036	336/23933	0.0294163	0.243906	g11960/g12107/g1306/g16957/g17371/g17486/g20283/g20505/g24659/g25179/g25447/g25541/g27129/g27144/g30608/g33085/g34731/g39116/g39267/g39643/g40874/g41748/g41992/g42794/g43027/g46294/g4923/g49798/g50626/g50761/g53211/g54735/g54803/g54875/g59138/g59654/g62127/g739/g9889	39	7	32
Biological process	GO:0044036	cell wall macromolecule metabolic process	25/2036	198/23933	0.0301862	0.249279	g1074/g16528/g19777/g20388/g23481/g28030/g29104/g29341/g34731/g4494/g4495/g46294/g50626/g50761/g51055/g54378/g54657/g54659/g54875/g56220/g59477/g59654/g60495/g739/g7816	25	7	18
Biological process	GO:0030162	regulation of proteolysis	11/2036	69/23933	0.030568	0.250413	g18125/g29047/g36877/g4301/g4738/g51430/g53874/g53922/g58352/g63993/g7794	11	5	6
Biological process	GO:0042430	indole-containing compound metabolic process	11/2036	69/23933	0.030568	0.250413	g20355/g24541/g25524/g25528/g31713/g38441/g41748/g48726/g61034/g6355/g63758	11	0	11
Biological process	GO:0009820	alkaloid metabolic process	13/2036	87/23933	0.0320926	0.260767	g12213/g13917/g29347/g30998/g34248/g43130/g48213/g56254/g56255/g61394/g808/g811/g812	13	3	10
Biological process	GO:0071472	cellular response to salt stress	10/2036	61/23933	0.03215	0.260767	g20638/g23966/g38441/g42120/g42128/g60072/g60090/g60339/g670/g932	10	2	8
Biological process	GO:0046165	alcohol biosynthetic process	14/2036	96/23933	0.0322915	0.260767	g11630/g16744/g16874/g17260/g31036/g3436/g38366/g43412/g48971/g51915/g52138/g54338/g56381/g64048	14	3	11
Biological process	GO:0006766	vitamin metabolic process	19/2036	142/23933	0.0323412	0.260767	g16803/g27492/g27493/g30831/g34248/g44940/g44968/g46697/g50425/g53373/g54240/g54963/g54990/g55256/g59172/g6783/g7563/g8172/g9966	19	3	16
Biological process	GO:0042447	hormone catabolic process	6/2036	29/23933	0.0326269	0.262039	g17144/g29126/g38960/g42002/g58554/g60256	6	1	5
Biological process	GO:0006566	threonine metabolic process	4/2036	15/23933	0.0333016	0.266413	g18387/g25809/g27075/g63697	4	0	4
Biological process	GO:0009423	chorismate biosynthetic process	5/2036	22/23933	0.0343741	0.273923	g13379/g23717/g3054/g42079/g5438	5	0	5
Biological process	GO:0072528	pyrimidine-containing compound biosynthetic process	14/2036	97/23933	0.0348955	0.277	g12899/g16803/g30831/g44940/g44968/g53927/g54990/g57284/g58558/g63746/g6783/g7563/g8172/g9966	14	2	12
Biological process	GO:0042126	nitrate metabolic process	9/2036	54/23933	0.0372281	0.293243	g12847/g13732/g15581/g15582/g26118/g30168/g54796/g58653/g59680	9	3	6
Biological process	GO:0042128	nitrate assimilation	9/2036	54/23933	0.0372281	0.293243	g12847/g13732/g15581/g15582/g26118/g30168/g54796/g58653/g59680	9	3	6
Biological process	GO:0031667	response to nutrient levels	27/2036	223/23933	0.0397553	0.311949	g13115/g13583/g1386/g13947/g18243/g19369/g19396/g24748/g25912/g26140/g26297/g29137/g34312/g34420/g41992/g46302/g4704/g5071/g50946/g52884/g53985/g5442/g57692/g60217/g60258/g9491/g9966	27	6	21
Biological process	GO:0009066	aspartate family amino acid metabolic process	11/2036	72/23933	0.0402269	0.313573	g18387/g19369/g19396/g25309/g25809/g27075/g33531/g33561/g54614/g58795/g63697	11	0	11
Biological process	GO:0006090	pyruvate metabolic process	14/2036	99/23933	0.0405511	0.313573	g14125/g21456/g32874/g39707/g39788/g45357/g49533/g49978/g50952/g58124/g58139/g60033/g61/g61019	14	1	13
Biological process	GO:0080144	amino acid homeostasis	5/2036	23/23933	0.0409433	0.313573	g14583/g20254/g25645/g3657/g56009	5	0	5
Biological process	GO:1900992	(-)-secologanin metabolic process	5/2036	23/23933	0.0409433	0.313573	g20318/g25553/g3761/g3785/g57510	5	1	4
Biological process	GO:1900994	(-)-secologanin biosynthetic process	5/2036	23/23933	0.0409433	0.313573	g20318/g25553/g3761/g3785/g57510	5	1	4
Biological process	GO:0008655	pyrimidine-containing compound salvage	4/2036	16/23933	0.0414933	0.313573	g12899/g53927/g63746/g8172	4	1	3
Biological process	GO:0010044	response to aluminum ion	4/2036	16/23933	0.0414933	0.313573	g29884/g57893/g62576/g7369	4	3	1
Biological process	GO:0010506	regulation of autophagy	4/2036	16/23933	0.0414933	0.313573	g23983/g24541/g43189/g49037	4	1	3
Biological process	GO:0031570	DNA integrity checkpoint	4/2036	16/23933	0.0414933	0.313573	g3310/g51459/g57703/g61447	4	0	4
Biological process	GO:0051098	regulation of binding	4/2036	16/23933	0.0414933	0.313573	g33906/g54810/g6101/g986	4	1	3
Biological process	GO:0007568	aging	32/2036	274/23933	0.0418372	0.315009	g11120/g11974/g12121/g16821/g18302/g18508/g19571/g29094/g31713/g34606/g35029/g36835/g37469/g37470/g37800/g39368/g40897/g42497/g444/g49928/g51198/g54469/g55174/g55182/g5798/g5801/g5831/g59194/g59313/g6355/g8011/g8328	32	7	25
Biological process	GO:0009808	lignin metabolic process	16/2036	118/23933	0.042081	0.315685	g1100/g14657/g17073/g17903/g20424/g25541/g31552/g31556/g41992/g46588/g47074/g51716/g553/g58655/g63758/g712	16	0	16
Biological process	GO:0009110	vitamin biosynthetic process	18/2036	137/23933	0.0425792	0.317001	g16803/g27492/g27493/g30831/g44940/g44968/g46697/g50425/g53373/g54240/g54963/g54990/g55256/g59172/g6783/g7563/g8172/g9966	18	2	16
Biological process	GO:0009687	abscisic acid metabolic process	8/2036	47/23933	0.0430603	0.317001	g14407/g17260/g31036/g3436/g41764/g43412/g54338/g60684	8	0	8
Biological process	GO:0010143	cutin biosynthetic process	8/2036	47/23933	0.0430603	0.317001	g20342/g20349/g25533/g26142/g5538/g58886/g58889/g7411	8	3	5
Biological process	GO:0043288	apocarotenoid metabolic process	8/2036	47/23933	0.0430603	0.317001	g14407/g17260/g31036/g3436/g41764/g43412/g54338/g60684	8	0	8
Biological process	GO:1902644	tertiary alcohol metabolic process	8/2036	47/23933	0.0430603	0.317001	g14407/g17260/g31036/g3436/g41764/g43412/g54338/g60684	8	0	8
Biological process	GO:0009308	amine metabolic process	21/2036	166/23933	0.0432586	0.317001	g1206/g13310/g1394/g1395/g17702/g20355/g21558/g24823/g24835/g24837/g25524/g25528/g41748/g44868/g48726/g57719/g58531/g58554/g59563/g60538/g8886	21	5	16
Biological process	GO:0007140	male meiotic nuclear division	6/2036	31/23933	0.0437873	0.317001	g19842/g248/g50319/g5268/g59010/g847	6	1	5
Biological process	GO:0015977	carbon fixation	6/2036	31/23933	0.0437873	0.317001	g23312/g23327/g32551/g32562/g56269/g60730	6	0	6
Biological process	GO:0046470	phosphatidylcholine metabolic process	6/2036	31/23933	0.0437873	0.317001	g24221/g29438/g52434/g61263/g62065/g62214	6	1	5
Biological process	GO:0016128	phytosteroid metabolic process	11/2036	73/23933	0.0438694	0.317001	g11630/g12969/g13033/g14407/g16874/g25209/g25519/g30016/g41764/g41882/g60684	11	2	9
Biological process	GO:0071214	cellular response to abiotic stimulus	37/2036	326/23933	0.0441139	0.317001	g19369/g19396/g20638/g21637/g23966/g25517/g30850/g30973/g31186/g34795/g35141/g38441/g4159/g41799/g42120/g42128/g43226/g43659/g43804/g47182/g49841/g55036/g55106/g55166/g55662/g59627/g60072/g60090/g60339/g60879/g60922/g670/g8906/g9006/g9121/g932/g9516	37	9	28
Biological process	GO:0104004	cellular response to environmental stimulus	37/2036	326/23933	0.0441139	0.317001	g19369/g19396/g20638/g21637/g23966/g25517/g30850/g30973/g31186/g34795/g35141/g38441/g4159/g41799/g42120/g42128/g43226/g43659/g43804/g47182/g49841/g55036/g55106/g55166/g55662/g59627/g60072/g60090/g60339/g60879/g60922/g670/g8906/g9006/g9121/g932/g9516	37	9	28
Biological process	GO:0006644	phospholipid metabolic process	33/2036	286/23933	0.0452781	0.323015	g14125/g16196/g16744/g17637/g17649/g18417/g24221/g25746/g26575/g29257/g29283/g29438/g3478/g36364/g38646/g39296/g46632/g52434/g53373/g55156/g55559/g58125/g58886/g59217/g59244/g60160/g60737/g60818/g61263/g62065/g62214/g64112/g767	33	10	23
Biological process	GO:0008652	cellular amino acid biosynthetic process	31/2036	266/23933	0.0456447	0.323015	g11786/g13379/g14228/g18387/g19369/g19396/g23717/g25309/g25524/g25809/g26957/g27075/g29053/g29752/g3054/g35146/g41748/g42079/g44161/g44735/g44770/g4601/g46557/g47681/g48726/g50946/g53985/g5438/g57375/g59342/g63697	31	2	29
Biological process	GO:0034637	cellular carbohydrate biosynthetic process	31/2036	266/23933	0.0456447	0.323015	g1074/g14109/g14373/g16744/g1767/g20388/g20541/g20790/g32506/g34731/g37631/g38321/g39116/g39267/g42126/g42632/g43027/g46294/g49798/g49876/g50626/g50761/g53594/g54735/g54875/g55556/g5718/g59654/g60089/g739/g9975	31	7	24
Biological process	GO:0001504	neurotransmitter uptake	3/2036	10/23933	0.0468435	0.323015	g20254/g25645/g3657	3	0	3
Biological process	GO:0030643	cellular phosphate ion homeostasis	3/2036	10/23933	0.0468435	0.323015	g17637/g17649/g64112	3	2	1
Biological process	GO:0051938	L-glutamate import	3/2036	10/23933	0.0468435	0.323015	g20254/g25645/g3657	3	0	3
Biological process	GO:0071218	cellular response to misfolded protein	3/2036	10/23933	0.0468435	0.323015	g15882/g42800/g59165	3	1	2
Biological process	GO:0071421	manganese ion transmembrane transport	3/2036	10/23933	0.0468435	0.323015	g34297/g60042/g7253	3	0	3
Biological process	GO:0072501	cellular divalent inorganic anion homeostasis	3/2036	10/23933	0.0468435	0.323015	g17637/g17649/g64112	3	2	1
Biological process	GO:0072502	cellular trivalent inorganic anion homeostasis	3/2036	10/23933	0.0468435	0.323015	g17637/g17649/g64112	3	2	1
Biological process	GO:0089718	amino acid import across plasma membrane	3/2036	10/23933	0.0468435	0.323015	g20254/g25645/g3657	3	0	3
Biological process	GO:0098712	L-glutamate import across plasma membrane	3/2036	10/23933	0.0468435	0.323015	g20254/g25645/g3657	3	0	3
Biological process	GO:0046686	response to cadmium ion	33/2036	287/23933	0.0471446	0.324	g10049/g13125/g14373/g15335/g17073/g19662/g20541/g26957/g28924/g28993/g33906/g33907/g36835/g38063/g38115/g41863/g41923/g4415/g45357/g46258/g50413/g54614/g55653/g57076/g57082/g57569/g58139/g58795/g60258/g60377/g688/g9339/g9635	33	8	25
Biological process	GO:0010431	seed maturation	13/2036	92/23933	0.0474728	0.325165	g16745/g21201/g38641/g41926/g423/g55037/g55151/g55355/g58450/g61366/g6465/g806/g9085	13	8	5
Biological process	GO:0009863	salicylic acid mediated signaling pathway	12/2036	83/23933	0.047812	0.325923	g18302/g185/g27600/g28257/g34066/g53797/g55198/g59134/g6380/g7950/g7958/g7995	12	1	11
Biological process	GO:0010167	response to nitrate	8/2036	48/23933	0.0479734	0.325923	g15581/g15582/g21240/g21248/g26602/g29137/g30168/g59680	8	1	7
Biological process	GO:0009299	mRNA transcription	5/2036	24/23933	0.04822	0.325923	g20212/g25696/g34947/g43482/g54284	5	3	2
Biological process	GO:1901806	beta-glucoside biosynthetic process	5/2036	24/23933	0.04822	0.325923	g20318/g25553/g3761/g3785/g57510	5	1	4
Biological process	GO:0006787	porphyrin-containing compound catabolic process	6/2036	32/23933	0.0501601	0.335071	g1326/g16281/g34775/g38203/g47774/g7747	6	2	4
Biological process	GO:0030245	cellulose catabolic process	6/2036	32/23933	0.0501601	0.335071	g12645/g18508/g19559/g35029/g5496/g61205	6	0	6
Biological process	GO:0033015	tetrapyrrole catabolic process	6/2036	32/23933	0.0501601	0.335071	g1326/g16281/g34775/g38203/g47774/g7747	6	2	4
Biological process	GO:0000278	mitotic cell cycle	38/2036	340/23933	0.0507126	0.335071	g1041/g1104/g13057/g13325/g1613/g17369/g17416/g19842/g24246/g24754/g26893/g29753/g29911/g30821/g31666/g31713/g31858/g34312/g38710/g39267/g40610/g41861/g43064/g43652/g43654/g49798/g50927/g51955/g54735/g57703/g59712/g61366/g6355/g63729/g6380/g748/g847/g9931	38	6	32
Biological process	GO:0006825	copper ion transport	4/2036	17/23933	0.0507188	0.335071	g39164/g48426/g62131/g62132	4	1	3
Biological process	GO:0015740	C4-dicarboxylate transport	4/2036	17/23933	0.0507188	0.335071	g29833/g34192/g41989/g59385	4	0	4
Biological process	GO:0030261	chromosome condensation	4/2036	17/23933	0.0507188	0.335071	g17416/g24754/g25383/g29753	4	0	4
Biological process	GO:0015994	chlorophyll metabolic process	16/2036	121/23933	0.0510486	0.336165	g1326/g14249/g14255/g24823/g34775/g38203/g38959/g39213/g42876/g47774/g53373/g58521/g58531/g59566/g6549/g7747	16	2	14
Biological process	GO:0006631	fatty acid metabolic process	42/2036	382/23933	0.0519218	0.34082	g1386/g14607/g17270/g20377/g20385/g20541/g23509/g23527/g23818/g24724/g25506/g26200/g26220/g26297/g31013/g31014/g31490/g32222/g34097/g34795/g39054/g39107/g40236/g41187/g42363/g4314/g460/g4805/g49940/g5181/g5220/g54221/g54581/g54796/g55180/g55229/g5538/g55653/g58412/g59174/g7903/g7933	42	9	33
Biological process	GO:0019747	regulation of isoprenoid metabolic process	8/2036	49/23933	0.053237	0.348337	g14125/g17144/g29126/g3436/g38960/g42002/g52884/g60256	8	0	8
Biological process	GO:0006778	porphyrin-containing compound metabolic process	18/2036	141/23933	0.0538888	0.351478	g1326/g14249/g14255/g16281/g24823/g27271/g34775/g38203/g38959/g39213/g42876/g47774/g53373/g58521/g58531/g59566/g6549/g7747	18	3	15
Biological process	GO:0010498	proteasomal protein catabolic process	51/2036	478/23933	0.0551323	0.351699	g1234/g15882/g17869/g18125/g19662/g20291/g20647/g218/g23990/g25974/g29047/g29565/g29855/g30147/g31036/g31265/g34960/g35554/g36877/g39121/g40834/g41947/g42063/g42800/g42840/g4301/g46297/g46847/g4738/g47620/g47939/g49932/g50927/g51123/g51430/g53145/g53874/g53922/g54439/g57880/g58352/g59165/g60217/g60587/g60940/g63993/g724/g727/g7411/g7537/g9339	51	20	31
Biological process	GO:0009788	negative regulation of abscisic acid-activated signaling pathway	12/2036	85/23933	0.0556841	0.351699	g20826/g28394/g2873/g29859/g40412/g42933/g43270/g43286/g50349/g61768/g61964/g9904	12	4	8
Biological process	GO:0019751	polyol metabolic process	12/2036	85/23933	0.0556841	0.351699	g16744/g17637/g17649/g23869/g38366/g48971/g51915/g52138/g55256/g56381/g57649/g64112	12	4	8
Biological process	GO:1901420	negative regulation of response to alcohol	12/2036	85/23933	0.0556841	0.351699	g20826/g28394/g2873/g29859/g40412/g42933/g43270/g43286/g50349/g61768/g61964/g9904	12	4	8
Biological process	GO:1905958	negative regulation of cellular response to alcohol	12/2036	85/23933	0.0556841	0.351699	g20826/g28394/g2873/g29859/g40412/g42933/g43270/g43286/g50349/g61768/g61964/g9904	12	4	8
Biological process	GO:0016109	tetraterpenoid biosynthetic process	7/2036	41/23933	0.0557026	0.351699	g11630/g1548/g16874/g29257/g29283/g38646/g953	7	1	6
Biological process	GO:0016117	carotenoid biosynthetic process	7/2036	41/23933	0.0557026	0.351699	g11630/g1548/g16874/g29257/g29283/g38646/g953	7	1	6
Biological process	GO:0043562	cellular response to nitrogen levels	7/2036	41/23933	0.0557026	0.351699	g18243/g46302/g4704/g5071/g50946/g5442/g9491	7	1	6
Biological process	GO:0046434	organophosphate catabolic process	17/2036	132/23933	0.0558144	0.351699	g17637/g17649/g21456/g32874/g39707/g39788/g45357/g49533/g49978/g50952/g58124/g58139/g58558/g60033/g61/g61019/g64112	17	3	14
Biological process	GO:0055062	phosphate ion homeostasis	5/2036	25/23933	0.0562104	0.351699	g17637/g17649/g25379/g52884/g64112	5	2	3
Biological process	GO:0072506	trivalent inorganic anion homeostasis	5/2036	25/23933	0.0562104	0.351699	g17637/g17649/g25379/g52884/g64112	5	2	3
Biological process	GO:1901804	beta-glucoside metabolic process	5/2036	25/23933	0.0562104	0.351699	g20318/g25553/g3761/g3785/g57510	5	1	4
Biological process	GO:0033013	tetrapyrrole metabolic process	18/2036	142/23933	0.0570166	0.351699	g1326/g14249/g14255/g16281/g24823/g27271/g34775/g38203/g38959/g39213/g42876/g47774/g53373/g58521/g58531/g59566/g6549/g7747	18	3	15
Biological process	GO:0006873	cellular ion homeostasis	26/2036	221/23933	0.0572531	0.351699	g12555/g16737/g17637/g17649/g24748/g25233/g27278/g3062/g30659/g31934/g34297/g39025/g43966/g54255/g54899/g54900/g57692/g59385/g60042/g60204/g60783/g62271/g63816/g64112/g7006/g7253	26	8	18
Biological process	GO:0006542	glutamine biosynthetic process	3/2036	11/23933	0.0604409	0.351699	g29752/g44735/g44770	3	0	3
Biological process	GO:0009310	amine catabolic process	3/2036	11/23933	0.0604409	0.351699	g20355/g25528/g57719	3	0	3
Biological process	GO:0009700	indole phytoalexin biosynthetic process	3/2036	11/23933	0.0604409	0.351699	g24541/g31713/g6355	3	0	3
Biological process	GO:0010080	regulation of floral meristem growth	3/2036	11/23933	0.0604409	0.351699	g26328/g41709/g58340	3	0	3
Biological process	GO:0010120	camalexin biosynthetic process	3/2036	11/23933	0.0604409	0.351699	g24541/g31713/g6355	3	0	3
Biological process	GO:0010207	photosystem II assembly	3/2036	11/23933	0.0604409	0.351699	g20638/g30850/g932	3	0	3
Biological process	GO:0016107	sesquiterpenoid catabolic process	3/2036	11/23933	0.0604409	0.351699	g14407/g41764/g60684	3	0	3
Biological process	GO:0030002	cellular anion homeostasis	3/2036	11/23933	0.0604409	0.351699	g17637/g17649/g64112	3	2	1
Biological process	GO:0030026	cellular manganese ion homeostasis	3/2036	11/23933	0.0604409	0.351699	g34297/g60042/g7253	3	0	3
Biological process	GO:0030320	cellular monovalent inorganic anion homeostasis	3/2036	11/23933	0.0604409	0.351699	g17637/g17649/g64112	3	2	1
Biological process	GO:0033384	geranyl diphosphate biosynthetic process	3/2036	11/23933	0.0604409	0.351699	g29257/g29283/g38646	3	0	3
Biological process	GO:0042402	cellular biogenic amine catabolic process	3/2036	11/23933	0.0604409	0.351699	g20355/g25528/g57719	3	0	3
Biological process	GO:0043290	apocarotenoid catabolic process	3/2036	11/23933	0.0604409	0.351699	g14407/g41764/g60684	3	0	3
Biological process	GO:0045337	farnesyl diphosphate biosynthetic process	3/2036	11/23933	0.0604409	0.351699	g29257/g29283/g38646	3	0	3
Biological process	GO:0046217	indole phytoalexin metabolic process	3/2036	11/23933	0.0604409	0.351699	g24541/g31713/g6355	3	0	3
Biological process	GO:0046345	abscisic acid catabolic process	3/2036	11/23933	0.0604409	0.351699	g14407/g41764/g60684	3	0	3
Biological process	GO:0046352	disaccharide catabolic process	3/2036	11/23933	0.0604409	0.351699	g23246/g41626/g44130	3	2	1
Biological process	GO:0051055	negative regulation of lipid biosynthetic process	3/2036	11/23933	0.0604409	0.351699	g34795/g41882/g52884	3	0	3
Biological process	GO:0052314	phytoalexin metabolic process	3/2036	11/23933	0.0604409	0.351699	g24541/g31713/g6355	3	0	3
Biological process	GO:0052315	phytoalexin biosynthetic process	3/2036	11/23933	0.0604409	0.351699	g24541/g31713/g6355	3	0	3
Biological process	GO:0052317	camalexin metabolic process	3/2036	11/23933	0.0604409	0.351699	g24541/g31713/g6355	3	0	3
Biological process	GO:0071731	response to nitric oxide	3/2036	11/23933	0.0604409	0.351699	g25912/g50349/g57692	3	0	3
Biological process	GO:0097366	response to bronchodilator	3/2036	11/23933	0.0604409	0.351699	g25912/g50349/g57692	3	0	3
Biological process	GO:0043067	regulation of programmed cell death	11/2036	77/23933	0.0606814	0.351699	g13310/g34290/g34960/g38995/g39121/g42840/g56381/g57848/g59025/g60232/g8826	11	3	8
Biological process	GO:0006576	cellular biogenic amine metabolic process	10/2036	68/23933	0.0609225	0.351699	g1206/g20355/g21558/g25524/g25528/g41748/g44868/g48726/g57719/g59563	10	2	8
Biological process	GO:0046890	regulation of lipid biosynthetic process	10/2036	68/23933	0.0609225	0.351699	g14125/g17144/g29126/g3436/g34795/g38960/g41882/g42002/g52884/g60256	10	0	10
Biological process	GO:2000762	regulation of phenylpropanoid metabolic process	4/2036	18/23933	0.0609693	0.351699	g20424/g41992/g51430/g58352	4	0	4
Biological process	GO:0035690	cellular response to drug	19/2036	153/23933	0.0611352	0.351699	g11639/g18302/g185/g25912/g27600/g28257/g34066/g38441/g41861/g50349/g53797/g55198/g57692/g59134/g63073/g6380/g7950/g7958/g7995	19	1	18
Biological process	GO:0000075	cell cycle checkpoint	6/2036	34/23933	0.0645254	0.369129	g30821/g3310/g40610/g51459/g57703/g61447	6	0	6
Biological process	GO:0051275	beta-glucan catabolic process	6/2036	34/23933	0.0645254	0.369129	g12645/g18508/g19559/g35029/g5496/g61205	6	0	6
Biological process	GO:0046417	chorismate metabolic process	5/2036	26/23933	0.0649146	0.37032	g13379/g23717/g3054/g42079/g5438	5	0	5
Biological process	GO:0009740	gibberellic acid mediated signaling pathway	14/2036	106/23933	0.0654039	0.372075	g16560/g26082/g30140/g38641/g38859/g41926/g47176/g50002/g52884/g5433/g59766/g64099/g9506/g9904	14	5	9
Biological process	GO:0065009	regulation of molecular function	36/2036	328/23933	0.0688657	0.386258	g1104/g13057/g13511/g14125/g14749/g17111/g17369/g20806/g2123/g29911/g30422/g3062/g33906/g33907/g36835/g37388/g39893/g41861/g46184/g46285/g51955/g5386/g54810/g59605/g60204/g6101/g61781/g7411/g748/g7593/g7794/g849/g850/g9006/g986/g9931	36	8	28
Biological process	GO:0009902	chloroplast relocation	7/2036	43/23933	0.0690284	0.386258	g12819/g25460/g36887/g41799/g51183/g58793/g9928	7	1	6
Biological process	GO:0019750	chloroplast localization	7/2036	43/23933	0.0690284	0.386258	g12819/g25460/g36887/g41799/g51183/g58793/g9928	7	1	6
Biological process	GO:0042435	indole-containing compound biosynthetic process	7/2036	43/23933	0.0690284	0.386258	g24541/g25524/g31713/g41748/g48726/g6355/g63758	7	0	7
Biological process	GO:0051644	plastid localization	7/2036	43/23933	0.0690284	0.386258	g12819/g25460/g36887/g41799/g51183/g58793/g9928	7	1	6
Biological process	GO:0051667	establishment of plastid localization	7/2036	43/23933	0.0690284	0.386258	g12819/g25460/g36887/g41799/g51183/g58793/g9928	7	1	6
Biological process	GO:0010476	gibberellin mediated signaling pathway	14/2036	107/23933	0.0696341	0.387529	g16560/g26082/g30140/g38641/g38859/g41926/g47176/g50002/g52884/g5433/g59766/g64099/g9506/g9904	14	5	9
Biological process	GO:0071370	cellular response to gibberellin stimulus	14/2036	107/23933	0.0696341	0.387529	g16560/g26082/g30140/g38641/g38859/g41926/g47176/g50002/g52884/g5433/g59766/g64099/g9506/g9904	14	5	9
Biological process	GO:0008037	cell recognition	26/2036	226/23933	0.0709066	0.393395	g30946/g32638/g34455/g34457/g37858/g37909/g38718/g38789/g38802/g38809/g38896/g38898/g38907/g38933/g46386/g47463/g54108/g58999/g59002/g59003/g59004/g59257/g61086/g61092/g61094/g9711	26	17	9
Biological process	GO:0000097	sulfur amino acid biosynthetic process	8/2036	52/23933	0.0711779	0.393395	g18387/g19369/g19396/g29053/g35146/g53985/g57375/g59342	8	1	7
Biological process	GO:0010941	regulation of cell death	15/2036	117/23933	0.0714338	0.393395	g13310/g33482/g34220/g34290/g34960/g38995/g39121/g42840/g50295/g54071/g56381/g57848/g59025/g60232/g8826	15	4	11
Biological process	GO:0009695	jasmonic acid biosynthetic process	9/2036	61/23933	0.0718229	0.393395	g1386/g26200/g26220/g31013/g31014/g40236/g5220/g55653/g58412	9	1	8
Biological process	GO:0009089	lysine biosynthetic process via diaminopimelate	4/2036	19/23933	0.0722248	0.393395	g18387/g25309/g27075/g63697	4	0	4
Biological process	GO:0009095	aromatic amino acid family biosynthetic process, prephenate pathway	4/2036	19/23933	0.0722248	0.393395	g14228/g4601/g46557/g47681	4	0	4
Biological process	GO:0009403	toxin biosynthetic process	4/2036	19/23933	0.0722248	0.393395	g24541/g29053/g31713/g6355	4	1	3
Biological process	GO:0046451	diaminopimelate metabolic process	4/2036	19/23933	0.0722248	0.393395	g18387/g25309/g27075/g63697	4	0	4
Biological process	GO:0006536	glutamate metabolic process	5/2036	27/23933	0.0743275	0.398268	g26957/g50321/g50322/g54614/g58795	5	0	5
Biological process	GO:0048826	cotyledon morphogenesis	5/2036	27/23933	0.0743275	0.398268	g12194/g34263/g38488/g59507/g60691	5	1	4
Biological process	GO:0055083	monovalent inorganic anion homeostasis	5/2036	27/23933	0.0743275	0.398268	g17637/g17649/g25379/g52884/g64112	5	2	3
Biological process	GO:0010451	floral meristem growth	3/2036	12/23933	0.0756477	0.398268	g26328/g41709/g58340	3	0	3
Biological process	GO:0019632	shikimate metabolic process	3/2036	12/23933	0.0756477	0.398268	g13379/g23717/g5438	3	0	3
Biological process	GO:0033383	geranyl diphosphate metabolic process	3/2036	12/23933	0.0756477	0.398268	g29257/g29283/g38646	3	0	3
Biological process	GO:0045833	negative regulation of lipid metabolic process	3/2036	12/23933	0.0756477	0.398268	g34795/g41882/g52884	3	0	3
Biological process	GO:0046654	tetrahydrofolate biosynthetic process	3/2036	12/23933	0.0756477	0.398268	g44161/g48971/g54963	3	0	3
Biological process	GO:0051291	protein heterooligomerization	3/2036	12/23933	0.0756477	0.398268	g20353/g25287/g25531	3	0	3
Biological process	GO:0098659	inorganic cation import across plasma membrane	3/2036	12/23933	0.0756477	0.398268	g54899/g54900/g60783	3	2	1
Biological process	GO:0098719	sodium ion import across plasma membrane	3/2036	12/23933	0.0756477	0.398268	g54899/g54900/g60783	3	2	1
Biological process	GO:0099587	inorganic ion import across plasma membrane	3/2036	12/23933	0.0756477	0.398268	g54899/g54900/g60783	3	2	1
Biological process	GO:1904668	positive regulation of ubiquitin protein ligase activity	3/2036	12/23933	0.0756477	0.398268	g7593/g849/g850	3	0	3
Biological process	GO:0043161	proteasome-mediated ubiquitin-dependent protein catabolic process	49/2036	468/23933	0.0760834	0.399536	g1234/g15882/g17869/g19662/g20291/g20647/g218/g23990/g25974/g29047/g29565/g29855/g30147/g31036/g31265/g34960/g35554/g36877/g39121/g40834/g41947/g42063/g42800/g42840/g4301/g46297/g46847/g4738/g47620/g47939/g49932/g50927/g51123/g51430/g53145/g53874/g53922/g54439/g57880/g58352/g60217/g60587/g60940/g63993/g724/g727/g7411/g7537/g9339	49	19	30
Biological process	GO:0051188	cofactor biosynthetic process	42/2036	394/23933	0.0763638	0.399982	g11388/g14249/g14255/g17260/g21456/g24823/g25223/g27271/g29943/g30619/g32874/g33531/g33561/g34248/g38959/g39213/g39707/g39788/g42876/g44161/g45357/g48971/g49533/g49978/g50425/g50952/g53373/g54963/g55256/g58124/g58139/g58521/g58531/g59172/g59566/g60033/g61/g61019/g63805/g6549/g8172/g9966	42	5	37
Biological process	GO:0000911	cytokinesis by cell plate formation	10/2036	71/23933	0.0771671	0.402133	g13325/g1613/g24246/g31666/g43652/g43654/g49798/g59712/g63729/g847	10	0	10
Biological process	GO:0071941	nitrogen cycle metabolic process	10/2036	71/23933	0.0771671	0.402133	g12847/g13732/g15581/g15582/g26118/g30168/g44770/g54796/g58653/g59680	10	3	7
Biological process	GO:0010089	xylem development	8/2036	53/23933	0.0778842	0.40484	g10520/g13310/g20424/g20482/g21558/g25386/g34290/g44868	8	0	8
Biological process	GO:0010647	positive regulation of cell communication	18/2036	148/23933	0.0784423	0.406627	g17111/g19566/g20019/g25788/g26140/g28924/g28993/g29438/g41861/g41863/g41923/g4709/g47620/g5220/g5433/g60377/g7537/g9506	18	8	10
Biological process	GO:0006694	steroid biosynthetic process	14/2036	109/23933	0.0786252	0.406627	g11630/g13668/g14407/g14657/g16874/g25519/g25746/g41764/g41882/g4952/g56601/g5788/g60684/g60737	14	1	13
Biological process	GO:0071446	cellular response to salicylic acid stimulus	12/2036	90/23933	0.0790223	0.407652	g18302/g185/g27600/g28257/g34066/g53797/g55198/g59134/g6380/g7950/g7958/g7995	12	1	11
Biological process	GO:0009108	coenzyme biosynthetic process	30/2036	270/23933	0.0797829	0.410541	g11388/g17260/g21456/g25223/g29943/g30619/g32874/g33531/g33561/g34248/g39707/g39788/g44161/g45357/g48971/g49533/g49978/g50425/g50952/g54963/g55256/g58124/g58139/g59172/g60033/g61/g61019/g63805/g8172/g9966	30	4	26
Biological process	GO:0006636	unsaturated fatty acid biosynthetic process	6/2036	36/23933	0.0810591	0.415022	g1386/g14607/g20377/g20385/g25506/g31490	6	1	5
Biological process	GO:0033559	unsaturated fatty acid metabolic process	6/2036	36/23933	0.0810591	0.415022	g1386/g14607/g20377/g20385/g25506/g31490	6	1	5
Biological process	GO:0010051	xylem and phloem pattern formation	13/2036	100/23933	0.0815192	0.416337	g15862/g16757/g30038/g34263/g38362/g38488/g41404/g41992/g50316/g58340/g59507/g60691/g62966	13	4	9
Biological process	GO:0045491	xylan metabolic process	10/2036	72/23933	0.0831253	0.423484	g20388/g28030/g34731/g4494/g4495/g46294/g51055/g59477/g59654/g739	10	3	7
Biological process	GO:0030148	sphingolipid biosynthetic process	5/2036	28/23933	0.0844386	0.427071	g17270/g56380/g56381/g56428/g59174	5	0	5
Biological process	GO:0009085	lysine biosynthetic process	4/2036	20/23933	0.084455	0.427071	g18387/g25309/g27075/g63697	4	0	4
Biological process	GO:0010588	cotyledon vascular tissue pattern formation	4/2036	20/23933	0.084455	0.427071	g34263/g38488/g59507/g60691	4	0	4
Biological process	GO:0071236	cellular response to antibiotic	15/2036	120/23933	0.0847504	0.427488	g11639/g18302/g185/g27600/g28257/g34066/g38441/g50349/g53797/g55198/g59134/g6380/g7950/g7958/g7995	15	1	14
Biological process	GO:0032147	activation of protein kinase activity	8/2036	54/23933	0.0849549	0.427488	g1104/g13057/g17369/g29911/g41861/g51955/g748/g9931	8	2	6
Biological process	GO:0055082	cellular chemical homeostasis	27/2036	241/23933	0.0857379	0.430371	g12555/g16737/g17637/g17649/g24446/g24748/g25233/g27278/g3062/g30659/g31934/g34297/g39025/g43966/g54255/g54899/g54900/g57692/g59385/g60042/g60204/g60783/g62271/g63816/g64112/g7006/g7253	27	8	19
Biological process	GO:0009967	positive regulation of signal transduction	17/2036	140/23933	0.0863038	0.431098	g17111/g19566/g20019/g25788/g28924/g28993/g29438/g41861/g41863/g41923/g4709/g47620/g5220/g5433/g60377/g7537/g9506	17	7	10
Biological process	GO:0023056	positive regulation of signaling	17/2036	140/23933	0.0863038	0.431098	g17111/g19566/g20019/g25788/g28924/g28993/g29438/g41861/g41863/g41923/g4709/g47620/g5220/g5433/g60377/g7537/g9506	17	7	10
Biological process	GO:0050801	ion homeostasis	41/2036	388/23933	0.0875795	0.436406	g1041/g12555/g12847/g14583/g16737/g17637/g17649/g20254/g24748/g25233/g25379/g25645/g26605/g27278/g3062/g30659/g31934/g34061/g34297/g3657/g39025/g39389/g43966/g47736/g52884/g54255/g54899/g54900/g55136/g56009/g57692/g58653/g59385/g60042/g60204/g60783/g62271/g63816/g64112/g7006/g7253	41	11	30
Biological process	GO:0000819	sister chromatid segregation	10/2036	73/23933	0.0893563	0.444179	g17416/g24754/g29753/g30685/g30821/g31858/g40610/g47780/g50927/g57703	10	0	10
Biological process	GO:0034404	nucleobase-containing small molecule biosynthetic process	19/2036	161/23933	0.0908689	0.445204	g1206/g12899/g21456/g32874/g39707/g39788/g45357/g49533/g49978/g50952/g53927/g55182/g58124/g58139/g58558/g60033/g61/g61019/g63869	19	3	16
Biological process	GO:0009690	cytokinin metabolic process	9/2036	64/23933	0.0912541	0.445204	g1394/g1395/g24823/g24835/g24837/g58531/g58554/g60538/g8886	9	3	6
Biological process	GO:2001057	reactive nitrogen species metabolic process	9/2036	64/23933	0.0912541	0.445204	g12847/g13732/g15581/g15582/g26118/g30168/g54796/g58653/g59680	9	3	6
Biological process	GO:0008272	sulfate transport	3/2036	13/23933	0.0923449	0.445204	g13273/g29833/g677	3	0	3
Biological process	GO:0010315	auxin efflux	3/2036	13/23933	0.0923449	0.445204	g41748/g43457/g58077	3	1	2
Biological process	GO:0015804	neutral amino acid transport	3/2036	13/23933	0.0923449	0.445204	g17702/g620/g644	3	2	1
Biological process	GO:0015813	L-glutamate transmembrane transport	3/2036	13/23933	0.0923449	0.445204	g20254/g25645/g3657	3	0	3
Biological process	GO:0031398	positive regulation of protein ubiquitination	3/2036	13/23933	0.0923449	0.445204	g7593/g849/g850	3	0	3
Biological process	GO:0051443	positive regulation of ubiquitin-protein transferase activity	3/2036	13/23933	0.0923449	0.445204	g7593/g849/g850	3	0	3
Biological process	GO:0055071	manganese ion homeostasis	3/2036	13/23933	0.0923449	0.445204	g34297/g60042/g7253	3	0	3
Biological process	GO:1903322	positive regulation of protein modification by small protein conjugation or removal	3/2036	13/23933	0.0923449	0.445204	g7593/g849/g850	3	0	3
Biological process	GO:0006714	sesquiterpenoid metabolic process	8/2036	55/23933	0.0923886	0.445204	g14407/g17260/g31036/g3436/g41764/g43412/g54338/g60684	8	0	8
Biological process	GO:0048825	cotyledon development	8/2036	55/23933	0.0923886	0.445204	g12194/g19589/g26098/g34263/g34802/g38488/g59507/g60691	8	2	6
Biological process	GO:0016125	sterol metabolic process	14/2036	112/23933	0.0934561	0.449291	g11630/g13668/g14407/g16874/g23527/g25519/g25746/g34097/g34394/g41764/g4952/g56601/g60684/g60737	14	2	12
Biological process	GO:0006650	glycerophospholipid metabolic process	19/2036	162/23933	0.0951447	0.449877	g16196/g17637/g17649/g18417/g24221/g29438/g3478/g39296/g46632/g52434/g55156/g55559/g59217/g59244/g60160/g61263/g62065/g62214/g64112	19	7	12
Biological process	GO:0006568	tryptophan metabolic process	5/2036	29/23933	0.0952327	0.449877	g20355/g25524/g25528/g41748/g48726	5	0	5
Biological process	GO:0006586	indolalkylamine metabolic process	5/2036	29/23933	0.0952327	0.449877	g20355/g25524/g25528/g41748/g48726	5	0	5
Biological process	GO:0015996	chlorophyll catabolic process	5/2036	29/23933	0.0952327	0.449877	g1326/g34775/g38203/g47774/g7747	5	1	4
Biological process	GO:0046149	pigment catabolic process	5/2036	29/23933	0.0952327	0.449877	g1326/g34775/g38203/g47774/g7747	5	1	4
Biological process	GO:0071249	cellular response to nitrate	5/2036	29/23933	0.0952327	0.449877	g21240/g21248/g26602/g29137/g30168	5	1	4
Biological process	GO:0072505	divalent inorganic anion homeostasis	5/2036	29/23933	0.0952327	0.449877	g17637/g17649/g25379/g52884/g64112	5	2	3
Biological process	GO:0044242	cellular lipid catabolic process	17/2036	142/23933	0.0953352	0.449877	g14407/g17144/g17637/g17649/g23818/g29126/g38960/g41764/g42002/g5220/g54221/g54581/g55653/g57649/g60256/g60684/g64112	17	3	14
Biological process	GO:0048544	recognition of pollen	25/2036	224/23933	0.0983538	0.463054	g30946/g32638/g34455/g34457/g37858/g37909/g38718/g38789/g38802/g38809/g38896/g38898/g38907/g38933/g46386/g54108/g58999/g59002/g59003/g59004/g59257/g61086/g61092/g61094/g9711	25	17	8
Biological process	GO:0031669	cellular response to nutrient levels	20/2036	173/23933	0.0990115	0.465081	g13115/g13947/g18243/g19369/g19396/g24748/g25912/g26140/g26297/g34420/g46302/g4704/g5071/g50946/g52884/g53985/g5442/g57692/g60258/g9491	20	3	17
Biological process	GO:0009937	regulation of gibberellic acid mediated signaling pathway	6/2036	38/23933	0.0997289	0.465409	g38641/g38859/g5433/g59766/g9506/g9904	6	2	4
Biological process	GO:0046700	heterocycle catabolic process	37/2036	350/23933	0.0997386	0.465409	g12213/g1326/g14135/g16281/g19898/g19973/g20355/g21337/g21456/g25472/g25528/g27600/g28257/g32874/g34775/g38203/g39707/g39788/g43189/g4532/g45357/g46302/g47774/g49037/g49533/g49978/g50946/g50952/g58124/g58139/g58558/g60033/g61/g61019/g61034/g7747/g7921	37	5	32
Biological process	GO:0009692	ethylene metabolic process	7/2036	47/23933	0.100899	0.465409	g25912/g29094/g31713/g39368/g59194/g6355/g8328	7	2	5
Biological process	GO:0009693	ethylene biosynthetic process	7/2036	47/23933	0.100899	0.465409	g25912/g29094/g31713/g39368/g59194/g6355/g8328	7	2	5
Biological process	GO:0016098	monoterpenoid metabolic process	7/2036	47/23933	0.100899	0.465409	g1143/g20318/g25553/g3761/g3785/g5000/g57510	7	3	4
Biological process	GO:0016099	monoterpenoid biosynthetic process	7/2036	47/23933	0.100899	0.465409	g1143/g20318/g25553/g3761/g3785/g5000/g57510	7	3	4
Biological process	GO:0043449	cellular alkene metabolic process	7/2036	47/23933	0.100899	0.465409	g25912/g29094/g31713/g39368/g59194/g6355/g8328	7	2	5
Biological process	GO:0043450	alkene biosynthetic process	7/2036	47/23933	0.100899	0.465409	g25912/g29094/g31713/g39368/g59194/g6355/g8328	7	2	5
Biological process	GO:0042542	response to hydrogen peroxide	12/2036	94/23933	0.101575	0.467472	g11639/g1386/g17073/g19571/g23246/g29047/g31281/g38441/g41626/g44130/g50349/g53874	12	3	9
Biological process	GO:0009991	response to extracellular stimulus	30/2036	277/23933	0.102047	0.467721	g13115/g13583/g1386/g13947/g18243/g19369/g19396/g24748/g25912/g26140/g26297/g29137/g34312/g34420/g38441/g41992/g42933/g46302/g4704/g5071/g50946/g52884/g53985/g5442/g55662/g57692/g60217/g60258/g9491/g9966	30	8	22
Biological process	GO:0009694	jasmonic acid metabolic process	10/2036	75/23933	0.102636	0.467721	g1386/g24750/g26200/g26220/g31013/g31014/g40236/g5220/g55653/g58412	10	1	9
Biological process	GO:0032506	cytokinetic process	10/2036	75/23933	0.102636	0.467721	g13325/g1613/g24246/g31666/g43652/g43654/g49798/g59712/g63729/g847	10	0	10
Biological process	GO:1902410	mitotic cytokinetic process	10/2036	75/23933	0.102636	0.467721	g13325/g1613/g24246/g31666/g43652/g43654/g49798/g59712/g63729/g847	10	0	10
Biological process	GO:0044270	cellular nitrogen compound catabolic process	37/2036	351/23933	0.102771	0.467721	g12213/g1326/g14135/g16281/g19898/g19973/g20355/g21337/g21456/g25472/g25528/g27600/g28257/g32874/g34775/g38203/g39707/g39788/g43189/g4532/g45357/g46302/g47774/g49037/g49533/g49978/g50946/g50952/g58124/g58139/g58558/g60033/g61/g61019/g61034/g7747/g7921	37	5	32
Biological process	GO:0030003	cellular cation homeostasis	23/2036	205/23933	0.104649	0.475215	g12555/g16737/g24748/g25233/g27278/g3062/g30659/g31934/g34297/g39025/g43966/g54255/g54899/g54900/g57692/g59385/g60042/g60204/g60783/g62271/g63816/g7006/g7253	23	6	17
Biological process	GO:0009069	serine family amino acid metabolic process	9/2036	66/23933	0.105763	0.478153	g16082/g19369/g19396/g29053/g35146/g53985/g57375/g59342/g62593	9	1	8
Biological process	GO:0016131	brassinosteroid metabolic process	9/2036	66/23933	0.105763	0.478153	g12969/g13033/g14407/g25209/g25519/g30016/g41764/g41882/g60684	9	1	8
Biological process	GO:0007584	response to nutrient	5/2036	30/23933	0.10669	0.480222	g1386/g29137/g34312/g60217/g9966	5	3	2
Biological process	GO:0046184	aldehyde biosynthetic process	5/2036	30/23933	0.10669	0.480222	g20318/g25553/g3761/g3785/g57510	5	1	4
Biological process	GO:0044070	regulation of anion transport	8/2036	57/23933	0.108334	0.481065	g16711/g17700/g17702/g29565/g37388/g39893/g49909/g61781	8	3	5
Biological process	GO:0006767	water-soluble vitamin metabolic process	13/2036	105/23933	0.109117	0.481065	g16803/g30831/g34248/g44940/g44968/g46697/g54963/g54990/g55256/g6783/g7563/g8172/g9966	13	2	11
Biological process	GO:0006730	one-carbon metabolic process	6/2036	39/23933	0.109842	0.481065	g14135/g25110/g25223/g63777/g63805/g7921	6	0	6
Biological process	GO:0010305	leaf vascular tissue pattern formation	6/2036	39/23933	0.109842	0.481065	g15862/g16757/g38362/g50316/g58340/g62966	6	2	4
Biological process	GO:0046173	polyol biosynthetic process	6/2036	39/23933	0.109842	0.481065	g16744/g38366/g48971/g51915/g52138/g56381	6	2	4
Biological process	GO:0016108	tetraterpenoid metabolic process	7/2036	48/23933	0.109935	0.481065	g11630/g1548/g16874/g29257/g29283/g38646/g953	7	1	6
Biological process	GO:0016116	carotenoid metabolic process	7/2036	48/23933	0.109935	0.481065	g11630/g1548/g16874/g29257/g29283/g38646/g953	7	1	6
Biological process	GO:1900673	olefin metabolic process	7/2036	48/23933	0.109935	0.481065	g25912/g29094/g31713/g39368/g59194/g6355/g8328	7	2	5
Biological process	GO:1900674	olefin biosynthetic process	7/2036	48/23933	0.109935	0.481065	g25912/g29094/g31713/g39368/g59194/g6355/g8328	7	2	5
Biological process	GO:0006002	fructose 6-phosphate metabolic process	3/2036	14/23933	0.110401	0.481065	g21456/g59365/g61019	3	0	3
Biological process	GO:0033539	fatty acid beta-oxidation using acyl-CoA dehydrogenase	3/2036	14/23933	0.110401	0.481065	g23818/g54581/g55653	3	0	3
Biological process	GO:0035725	sodium ion transmembrane transport	3/2036	14/23933	0.110401	0.481065	g54899/g54900/g60783	3	2	1
Biological process	GO:0045144	meiotic sister chromatid segregation	3/2036	14/23933	0.110401	0.481065	g30685/g30821/g47780	3	0	3
Biological process	GO:0051177	meiotic sister chromatid cohesion	3/2036	14/23933	0.110401	0.481065	g30685/g30821/g47780	3	0	3
Biological process	GO:1904666	regulation of ubiquitin protein ligase activity	3/2036	14/23933	0.110401	0.481065	g7593/g849/g850	3	0	3
Biological process	GO:0006732	coenzyme metabolic process	39/2036	375/23933	0.111181	0.481499	g11388/g17260/g18031/g19167/g21456/g24385/g25223/g25746/g29943/g30619/g32874/g33531/g33561/g34248/g39707/g39788/g44161/g45357/g47463/g48971/g49533/g49978/g50425/g50952/g54791/g54963/g55256/g56269/g58124/g58139/g59172/g60033/g60737/g61/g61019/g63805/g8172/g9838/g9966	39	5	34
Biological process	GO:0006553	lysine metabolic process	4/2036	22/23933	0.111676	0.481499	g18387/g25309/g27075/g63697	4	0	4
Biological process	GO:0010189	vitamin E biosynthetic process	4/2036	22/23933	0.111676	0.481499	g27492/g27493/g53373/g54240	4	0	4
Biological process	GO:0035967	cellular response to topologically incorrect protein	4/2036	22/23933	0.111676	0.481499	g15882/g42800/g42933/g59165	4	2	2
Biological process	GO:0042360	vitamin E metabolic process	4/2036	22/23933	0.111676	0.481499	g27492/g27493/g53373/g54240	4	0	4
Biological process	GO:0001505	regulation of neurotransmitter levels	8/2036	58/23933	0.116838	0.502318	g13732/g20254/g25645/g26957/g28449/g3657/g50946/g62593	8	1	7
Biological process	GO:0071470	cellular response to osmotic stress	10/2036	77/23933	0.116995	0.502318	g20638/g23966/g38441/g42120/g42128/g60072/g60090/g60339/g670/g932	10	2	8
Biological process	GO:0005992	trehalose biosynthetic process	5/2036	31/23933	0.118787	0.506823	g1767/g37631/g42126/g49876/g60089	5	0	5
Biological process	GO:0006814	sodium ion transport	5/2036	31/23933	0.118787	0.506823	g36463/g54899/g54900/g59385/g60783	5	3	2
Biological process	GO:0009641	shade avoidance	5/2036	31/23933	0.118787	0.506823	g12646/g30973/g60524/g61504/g9121	5	2	3
Biological process	GO:0036293	response to decreased oxygen levels	9/2036	68/23933	0.121495	0.517303	g18795/g18933/g24467/g24646/g32184/g32267/g32268/g352/g53559	9	0	9
Biological process	GO:0009816	defense response to bacterium, incompatible interaction	10/2036	78/23933	0.124573	0.529307	g17111/g19571/g20355/g23983/g25528/g36877/g47774/g54071/g59025/g9006	10	3	7
Biological process	GO:0006775	fat-soluble vitamin metabolic process	4/2036	23/23933	0.126567	0.535434	g27492/g27493/g53373/g54240	4	0	4
Biological process	GO:0042362	fat-soluble vitamin biosynthetic process	4/2036	23/23933	0.126567	0.535434	g27492/g27493/g53373/g54240	4	0	4
Biological process	GO:0030001	metal ion transport	44/2036	434/23933	0.127826	0.535434	g12119/g12555/g1277/g13677/g16737/g21204/g21966/g22481/g22727/g25233/g27278/g30659/g31934/g33730/g34297/g36463/g37945/g39025/g39164/g39180/g43731/g43966/g47736/g47819/g48426/g54255/g54899/g54900/g57692/g59385/g60042/g60783/g61034/g61621/g62131/g62132/g62271/g63816/g7006/g7253/g7768/g7787/g8866/g9511	44	20	24
Biological process	GO:0030243	cellulose metabolic process	13/2036	108/23933	0.128032	0.535434	g12645/g14373/g18508/g19559/g20790/g35029/g39267/g43027/g49798/g53594/g54735/g5496/g61205	13	2	11
Biological process	GO:0009070	serine family amino acid biosynthetic process	7/2036	50/23933	0.129239	0.535434	g19369/g19396/g29053/g35146/g53985/g57375/g59342	7	1	6
Biological process	GO:0006535	cysteine biosynthetic process from serine	3/2036	15/23933	0.129676	0.535434	g35146/g53985/g57375	3	0	3
Biological process	GO:0006782	protoporphyrinogen IX biosynthetic process	3/2036	15/23933	0.129676	0.535434	g38959/g39213/g59566	3	0	3
Biological process	GO:0006880	intracellular sequestering of iron ion	3/2036	15/23933	0.129676	0.535434	g34297/g60042/g7253	3	0	3
Biological process	GO:0009396	folic acid-containing compound biosynthetic process	3/2036	15/23933	0.129676	0.535434	g44161/g48971/g54963	3	0	3
Biological process	GO:0043620	regulation of DNA-templated transcription in response to stress	3/2036	15/23933	0.129676	0.535434	g13583/g14749/g23966	3	0	3
Biological process	GO:0046501	protoporphyrinogen IX metabolic process	3/2036	15/23933	0.129676	0.535434	g38959/g39213/g59566	3	0	3
Biological process	GO:0051438	regulation of ubiquitin-protein transferase activity	3/2036	15/23933	0.129676	0.535434	g7593/g849/g850	3	0	3
Biological process	GO:0072523	purine-containing compound catabolic process	3/2036	15/23933	0.129676	0.535434	g14135/g46302/g7921	3	0	3
Biological process	GO:0097577	sequestering of iron ion	3/2036	15/23933	0.129676	0.535434	g34297/g60042/g7253	3	0	3
Biological process	GO:0006071	glycerol metabolic process	5/2036	32/23933	0.131495	0.538605	g17637/g17649/g23869/g57649/g64112	5	2	3
Biological process	GO:0006206	pyrimidine nucleobase metabolic process	5/2036	32/23933	0.131495	0.538605	g12899/g50946/g53927/g57284/g63746	5	1	4
Biological process	GO:0019400	alditol metabolic process	5/2036	32/23933	0.131495	0.538605	g17637/g17649/g23869/g57649/g64112	5	2	3
Biological process	GO:0043086	negative regulation of catalytic activity	5/2036	32/23933	0.131495	0.538605	g13511/g20806/g36835/g59605/g7794	5	1	4
Biological process	GO:0000041	transition metal ion transport	10/2036	79/23933	0.132412	0.541278	g34297/g39164/g39180/g48426/g60042/g61034/g62131/g62132/g7253/g9511	10	2	8
Biological process	GO:0097164	ammonium ion metabolic process	11/2036	89/23933	0.133921	0.546353	g1206/g12213/g24221/g28449/g29438/g52434/g56381/g57719/g61263/g62065/g62214	11	3	8
Biological process	GO:0046364	monosaccharide biosynthetic process	8/2036	60/23933	0.134874	0.549148	g26682/g39116/g39707/g39788/g45357/g55256/g58139/g60258	8	2	6
Biological process	GO:0042546	cell wall biogenesis	30/2036	286/23933	0.136111	0.553085	g16528/g19777/g20388/g23481/g25179/g25541/g29104/g30608/g34731/g37636/g37637/g39116/g39267/g41748/g41992/g46294/g49798/g50626/g50761/g53211/g54378/g54657/g54659/g54735/g54875/g56220/g59138/g59654/g739/g7816	30	9	21
Biological process	GO:0051726	regulation of cell cycle	31/2036	297/23933	0.13753	0.557744	g1041/g1104/g13057/g17369/g19842/g26893/g29911/g30422/g30821/g31128/g31713/g3310/g34312/g34795/g40610/g41861/g48089/g50927/g51459/g51955/g53661/g5386/g57703/g59927/g61366/g61447/g63073/g6355/g6380/g748/g9931	31	7	24
Biological process	GO:0070482	response to oxygen levels	9/2036	70/23933	0.138415	0.560063	g18795/g18933/g24467/g24646/g32184/g32267/g32268/g352/g53559	9	0	9
Biological process	GO:0046916	cellular transition metal ion homeostasis	16/2036	140/23933	0.138648	0.560063	g12555/g16737/g24748/g25233/g27278/g30659/g31934/g34297/g39025/g43966/g57692/g60042/g62271/g63816/g7006/g7253	16	3	13
Biological process	GO:0009404	toxin metabolic process	7/2036	51/23933	0.139485	0.562331	g16057/g24541/g28952/g29053/g29615/g31713/g6355	7	1	6
Biological process	GO:0002253	activation of immune response	15/2036	130/23933	0.139906	0.562922	g1386/g18302/g2168/g28289/g37945/g39893/g42615/g50120/g50123/g50130/g50180/g50186/g57627/g59025/g61781	15	8	7
Biological process	GO:0009636	response to toxic substance	23/2036	213/23933	0.140704	0.563442	g11639/g13127/g1386/g15581/g15582/g16057/g17073/g18043/g19571/g20374/g23246/g25209/g25510/g28952/g29047/g29615/g31281/g38441/g41626/g43645/g44130/g50349/g53874	23	4	19
Biological process	GO:0048584	positive regulation of response to stimulus	45/2036	449/23933	0.141451	0.563442	g1386/g17111/g18302/g19566/g20019/g2168/g25788/g26140/g28289/g28924/g28993/g29438/g29570/g31128/g33482/g34250/g3590/g36877/g37696/g37945/g39893/g41861/g41863/g41923/g42615/g42772/g43455/g4709/g47620/g49910/g50120/g50123/g50130/g50180/g50186/g5220/g5433/g57627/g59025/g60377/g61504/g61780/g61781/g7537/g9506	45	24	21
Biological process	GO:0031347	regulation of defense response	46/2036	460/23933	0.141845	0.563442	g13640/g1386/g14749/g15879/g17111/g17164/g18302/g19571/g2168/g24003/g24750/g25720/g28289/g29570/g29758/g31186/g31288/g31550/g31615/g33482/g35504/g3590/g37258/g37696/g37945/g39893/g40975/g41861/g42615/g42772/g45992/g46002/g46184/g46285/g4709/g50155/g51746/g55036/g55166/g57627/g59025/g60581/g60879/g61034/g61780/g61781	46	13	33
Biological process	GO:0042364	water-soluble vitamin biosynthetic process	12/2036	100/23933	0.141865	0.563442	g16803/g30831/g44940/g44968/g46697/g54963/g54990/g55256/g6783/g7563/g8172/g9966	12	1	11
Biological process	GO:0047484	regulation of response to osmotic stress	12/2036	100/23933	0.141865	0.563442	g17111/g28924/g28993/g3062/g3436/g41863/g41923/g47620/g60204/g60339/g60377/g7537	12	6	6
Biological process	GO:0006515	protein quality control for misfolded or incompletely synthesized proteins	4/2036	24/23933	0.142236	0.563442	g15882/g34662/g42800/g59165	4	2	2
Biological process	GO:0009649	entrainment of circadian clock	4/2036	24/23933	0.142236	0.563442	g25517/g25584/g30973/g43672	4	3	1
Biological process	GO:0045338	farnesyl diphosphate metabolic process	4/2036	24/23933	0.142236	0.563442	g29257/g29283/g38646/g767	4	0	4
Biological process	GO:0006935	chemotaxis	5/2036	33/23933	0.144785	0.568266	g43124/g50413/g51915/g52138/g57569	5	3	2
Biological process	GO:0010183	pollen tube guidance	5/2036	33/23933	0.144785	0.568266	g43124/g50413/g51915/g52138/g57569	5	3	2
Biological process	GO:0042330	taxis	5/2036	33/23933	0.144785	0.568266	g43124/g50413/g51915/g52138/g57569	5	3	2
Biological process	GO:0050918	positive chemotaxis	5/2036	33/23933	0.144785	0.568266	g43124/g50413/g51915/g52138/g57569	5	3	2
Biological process	GO:0042180	cellular ketone metabolic process	19/2036	172/23933	0.144841	0.568266	g12213/g14125/g17144/g17702/g20355/g25427/g25528/g29126/g30619/g3436/g34795/g38960/g41748/g42002/g50425/g52884/g58667/g59172/g60256	19	3	16
Biological process	GO:2000113	negative regulation of cellular macromolecule biosynthetic process	40/2036	396/23933	0.145952	0.571527	g10186/g12377/g12832/g13174/g13217/g13583/g13867/g17497/g18302/g18834/g2316/g24292/g25092/g25936/g27665/g29570/g31550/g33906/g34420/g36835/g38746/g388/g41806/g4531/g4532/g47745/g48393/g48394/g49910/g51746/g52884/g53661/g55106/g55828/g58207/g59605/g59927/g60922/g9121/g9594	40	8	32
Biological process	GO:0007623	circadian rhythm	26/2036	246/23933	0.147106	0.57495	g11537/g1386/g17207/g24312/g24753/g24894/g25517/g25584/g2767/g2896/g30418/g30909/g30927/g30973/g31138/g31552/g31556/g33906/g33907/g36554/g4159/g43672/g47182/g48715/g51716/g55796	26	12	14
Biological process	GO:0019216	regulation of lipid metabolic process	10/2036	81/23933	0.148855	0.57957	g14125/g17144/g29126/g3436/g34795/g38960/g41882/g42002/g52884/g60256	10	0	10
Biological process	GO:0034754	cellular hormone metabolic process	10/2036	81/23933	0.148855	0.57957	g1394/g1395/g24823/g24835/g24837/g58531/g58554/g60538/g63758/g8886	10	3	7
Biological process	GO:0032350	regulation of hormone metabolic process	11/2036	91/23933	0.149434	0.580048	g1041/g17144/g25524/g29126/g38960/g41748/g41882/g42002/g52884/g58667/g60256	11	2	9
Biological process	GO:0051788	response to misfolded protein	3/2036	16/23933	0.150025	0.580048	g15882/g42800/g59165	3	1	2
Biological process	GO:1902475	L-alpha-amino acid transmembrane transport	3/2036	16/23933	0.150025	0.580048	g20254/g25645/g3657	3	0	3
Biological process	GO:0016126	sterol biosynthetic process	7/2036	52/23933	0.15011	0.580048	g11630/g13668/g16874/g25746/g4952/g56601/g60737	7	1	6
Biological process	GO:0051187	cofactor catabolic process	16/2036	142/23933	0.151058	0.582613	g1326/g14135/g16281/g16957/g20424/g23950/g28561/g28564/g34466/g34775/g38063/g38203/g39643/g47774/g7747/g7921	16	2	14
Biological process	GO:0001666	response to hypoxia	8/2036	62/23933	0.154228	0.593721	g18795/g18933/g24646/g32184/g32267/g32268/g352/g53559	8	0	8
Biological process	GO:0030004	cellular monovalent inorganic cation homeostasis	6/2036	43/23933	0.155143	0.59612	g3062/g54899/g54900/g59385/g60204/g60783	6	2	4
Biological process	GO:0044106	cellular amine metabolic process	11/2036	92/23933	0.157524	0.602709	g1206/g17702/g20355/g21558/g25524/g25528/g41748/g44868/g48726/g57719/g59563	11	2	9
Biological process	GO:0010015	root morphogenesis	35/2036	345/23933	0.158139	0.602709	g1008/g11240/g11247/g12658/g13174/g13217/g13583/g13867/g15879/g186/g19842/g21456/g24823/g25313/g25936/g26525/g30418/g33085/g34061/g34802/g38362/g39389/g4095/g41992/g50451/g50506/g52884/g56590/g56783/g58340/g58531/g61019/g62835/g63729/g8186	35	10	25
Biological process	GO:0009904	chloroplast accumulation movement	4/2036	25/23933	0.158622	0.602709	g25460/g41799/g51183/g58793	4	0	4
Biological process	GO:0080110	sporopollenin biosynthetic process	4/2036	25/23933	0.158622	0.602709	g32222/g57724/g57770/g57779	4	1	3
Biological process	GO:0005991	trehalose metabolic process	5/2036	34/23933	0.158623	0.602709	g1767/g37631/g42126/g49876/g60089	5	0	5
Biological process	GO:0042168	heme metabolic process	5/2036	34/23933	0.158623	0.602709	g16281/g27271/g38959/g39213/g59566	5	1	4
Biological process	GO:0006754	ATP biosynthetic process	14/2036	123/23933	0.161597	0.612871	g21456/g32874/g39707/g39788/g45357/g49533/g49978/g50952/g58124/g58139/g59328/g60033/g61/g61019	14	1	13
Biological process	GO:0000910	cytokinesis	16/2036	144/23933	0.16405	0.621025	g13325/g1613/g192/g19842/g24246/g31666/g39267/g43064/g43652/g43654/g49798/g54735/g59712/g63073/g63729/g847	16	1	15
Biological process	GO:0023014	signal transduction by protein phosphorylation	8/2036	63/23933	0.164376	0.62111	g1104/g13057/g29911/g34312/g41861/g51955/g748/g9931	8	3	5
Biological process	GO:0009738	abscisic acid-activated signaling pathway	41/2036	412/23933	0.165264	0.623315	g1104/g11068/g14749/g16785/g17111/g19566/g20291/g20826/g25316/g26905/g28394/g2873/g29438/g29557/g29859/g29911/g32638/g3436/g35554/g40412/g41139/g423/g42772/g42933/g43270/g43286/g4709/g47371/g47620/g50349/g5220/g54916/g57880/g58174/g60407/g61768/g61964/g7537/g767/g9904/g9931	41	16	25
Biological process	GO:0048232	male gamete generation	9/2036	73/23933	0.165914	0.624616	g16559/g19842/g248/g26525/g48426/g50319/g5268/g59010/g847	9	4	5
Biological process	GO:0045786	negative regulation of cell cycle	10/2036	83/23933	0.166279	0.624624	g1041/g30821/g3310/g34795/g40610/g51459/g53661/g57703/g59927/g61447	10	1	9
Biological process	GO:0009639	response to red or far red light	35/2036	347/23933	0.166526	0.624624	g1049/g12646/g1386/g20212/g20638/g21637/g25517/g25696/g26082/g28945/g29023/g30973/g35141/g35276/g39309/g401/g42630/g43659/g43804/g47182/g48089/g49841/g55106/g56380/g56381/g56428/g58077/g58340/g59046/g60524/g60922/g61504/g61768/g9121/g932	35	13	22
Biological process	GO:0055114	oxidation-reduction process	43/2036	435/23933	0.169616	0.635052	g13124/g15752/g16281/g18795/g18933/g19548/g23818/g24646/g25730/g25907/g26200/g26220/g30871/g31490/g32184/g32267/g32268/g33531/g33561/g352/g40236/g42791/g46258/g4952/g50500/g51100/g5220/g52271/g53350/g53559/g54221/g54264/g54581/g55229/g55556/g55653/g56601/g58412/g59342/g63993/g9155/g9174/g9816	43	5	38
Biological process	GO:0009768	photosynthesis, light harvesting in photosystem I	3/2036	17/23933	0.171305	0.635567	g280/g39043/g54350	3	0	3
Biological process	GO:0010264	myo-inositol hexakisphosphate biosynthetic process	3/2036	17/23933	0.171305	0.635567	g38366/g51915/g52138	3	2	1
Biological process	GO:0015807	L-amino acid transport	3/2036	17/23933	0.171305	0.635567	g20254/g25645/g3657	3	0	3
Biological process	GO:0033517	myo-inositol hexakisphosphate metabolic process	3/2036	17/23933	0.171305	0.635567	g38366/g51915/g52138	3	2	1
Biological process	GO:0042559	pteridine-containing compound biosynthetic process	3/2036	17/23933	0.171305	0.635567	g44161/g48971/g54963	3	0	3
Biological process	GO:1903959	regulation of anion transmembrane transport	7/2036	54/23933	0.172442	0.638627	g16711/g17700/g17702/g37388/g39893/g49909/g61781	7	3	4
Biological process	GO:0051338	regulation of transferase activity	15/2036	135/23933	0.173533	0.641506	g1104/g13057/g14125/g17369/g29911/g30422/g41861/g51955/g5386/g59605/g748/g7593/g849/g850/g9931	15	2	13
Biological process	GO:0045892	negative regulation of transcription, DNA-templated	35/2036	349/23933	0.175158	0.645872	g10186/g12377/g12832/g13174/g13217/g13583/g13867/g17497/g18302/g18834/g2316/g24292/g25092/g25936/g27665/g29570/g31550/g33906/g34420/g36835/g38746/g41806/g4531/g47745/g48393/g48394/g49910/g51746/g52884/g55106/g55828/g58207/g60922/g9121/g9594	35	7	28
Biological process	GO:0015706	nitrate transport	9/2036	74/23933	0.175613	0.645872	g15581/g15582/g18447/g21240/g21248/g26602/g30168/g41992/g61053	9	2	7
Biological process	GO:0009934	regulation of meristem structural organization	4/2036	26/23933	0.17566	0.645872	g26328/g26893/g38362/g41709	4	0	4
Biological process	GO:0048609	multicellular organismal reproductive process	23/2036	220/23933	0.177483	0.650693	g16559/g16745/g19842/g21201/g248/g26525/g38641/g41926/g423/g48426/g50319/g5268/g55037/g55151/g55355/g58450/g59010/g60492/g61366/g6465/g806/g847/g9085	23	13	10
Biological process	GO:0009201	ribonucleoside triphosphate biosynthetic process	16/2036	146/23933	0.177606	0.650693	g12899/g21456/g32874/g39707/g39788/g45357/g49533/g49978/g50952/g53927/g58124/g58139/g59328/g60033/g61/g61019	16	2	14
Biological process	GO:0097237	cellular response to toxic substance	6/2036	45/23933	0.180428	0.659662	g11639/g18043/g20374/g25510/g38441/g50349	6	0	6
Biological process	GO:1903047	mitotic cell cycle process	25/2036	242/23933	0.180698	0.659662	g13325/g1613/g17369/g17416/g24246/g24754/g26893/g29753/g30821/g31666/g31858/g38710/g39267/g40610/g43064/g43652/g43654/g49798/g50927/g54735/g57703/g59712/g61366/g63729/g847	25	2	23
Biological process	GO:0046486	glycerolipid metabolic process	22/2036	210/23933	0.181309	0.660714	g16196/g17637/g17649/g18417/g23869/g24221/g29438/g3478/g39296/g43255/g46632/g52434/g55156/g55559/g57649/g59217/g59244/g60160/g61263/g62065/g62214/g64112	22	7	15
Biological process	GO:0015995	chlorophyll biosynthetic process	11/2036	95/23933	0.183065	0.665927	g14249/g14255/g24823/g38959/g39213/g42876/g53373/g58521/g58531/g59566/g6549	11	1	10
Biological process	GO:0016129	phytosteroid biosynthetic process	7/2036	55/23933	0.184116	0.666201	g11630/g14407/g16874/g25519/g41764/g41882/g60684	7	1	6
Biological process	GO:0016226	iron-sulfur cluster assembly	7/2036	55/23933	0.184116	0.666201	g19690/g31128/g33531/g33561/g9734/g9749/g9759	7	1	6
Biological process	GO:0031163	metallo-sulfur cluster assembly	7/2036	55/23933	0.184116	0.666201	g19690/g31128/g33531/g33561/g9734/g9749/g9759	7	1	6
Biological process	GO:0046885	regulation of hormone biosynthetic process	8/2036	65/23933	0.185554	0.670219	g17144/g25524/g29126/g38960/g41882/g42002/g52884/g60256	8	0	8
Biological process	GO:0071407	cellular response to organic cyclic compound	22/2036	211/23933	0.187156	0.670893	g16560/g16757/g18118/g18302/g185/g27600/g28257/g31167/g34066/g41806/g41882/g50316/g53797/g55001/g55198/g59134/g61034/g63073/g6380/g7950/g7958/g7995	22	4	18
Biological process	GO:0009292	genetic transfer	5/2036	36/23933	0.187798	0.670893	g41368/g48949/g48951/g55729/g55730	5	1	4
Biological process	GO:0009294	DNA mediated transformation	5/2036	36/23933	0.187798	0.670893	g41368/g48949/g48951/g55729/g55730	5	1	4
Biological process	GO:0009688	abscisic acid biosynthetic process	5/2036	36/23933	0.187798	0.670893	g17260/g31036/g3436/g43412/g54338	5	0	5
Biological process	GO:0043289	apocarotenoid biosynthetic process	5/2036	36/23933	0.187798	0.670893	g17260/g31036/g3436/g43412/g54338	5	0	5
Biological process	GO:1902645	tertiary alcohol biosynthetic process	5/2036	36/23933	0.187798	0.670893	g17260/g31036/g3436/g43412/g54338	5	0	5
Biological process	GO:0015698	inorganic anion transport	15/2036	137/23933	0.188033	0.670893	g13273/g15581/g15582/g18447/g21200/g21240/g21248/g26602/g29565/g29833/g30168/g41992/g5297/g61053/g677	15	2	13
Biological process	GO:1901607	alpha-amino acid biosynthetic process	24/2036	233/23933	0.190327	0.677895	g11786/g14228/g18387/g19369/g19396/g25309/g25524/g25809/g26957/g27075/g29053/g29752/g35146/g41748/g44735/g44770/g4601/g46557/g47681/g48726/g53985/g57375/g59342/g63697	24	2	22
Biological process	GO:0006875	cellular metal ion homeostasis	18/2036	169/23933	0.19085	0.678351	g12555/g16737/g24748/g25233/g27278/g3062/g30659/g31934/g34297/g39025/g43966/g57692/g60042/g60204/g62271/g63816/g7006/g7253	18	3	15
Biological process	GO:0006575	cellular modified amino acid metabolic process	14/2036	127/23933	0.191449	0.678351	g14135/g16057/g16805/g24385/g28449/g28952/g29615/g38063/g44161/g48971/g54963/g767/g7702/g7921	14	2	12
Biological process	GO:0061640	cytoskeleton-dependent cytokinesis	14/2036	127/23933	0.191449	0.678351	g13325/g1613/g19842/g24246/g31666/g39267/g43064/g43652/g43654/g49798/g54735/g59712/g63729/g847	14	1	13
Biological process	GO:0006275	regulation of DNA replication	4/2036	27/23933	0.193283	0.679291	g47963/g53661/g59927/g63073	4	0	4
Biological process	GO:0070417	cellular response to cold	4/2036	27/23933	0.193283	0.679291	g13822/g29565/g55662/g61385	4	2	2
Biological process	GO:0006828	manganese ion transport	3/2036	18/23933	0.193372	0.679291	g34297/g60042/g7253	3	0	3
Biological process	GO:0031330	negative regulation of cellular catabolic process	3/2036	18/23933	0.193372	0.679291	g18125/g43189/g49037	3	1	2
Biological process	GO:0031396	regulation of protein ubiquitination	3/2036	18/23933	0.193372	0.679291	g7593/g849/g850	3	0	3
Biological process	GO:0000070	mitotic sister chromatid segregation	7/2036	56/23933	0.196107	0.687716	g17416/g24754/g29753/g30821/g31858/g40610/g50927	7	0	7
Biological process	GO:0043094	cellular metabolic compound salvage	12/2036	107/23933	0.198038	0.693302	g12899/g18243/g23312/g23327/g34248/g5071/g53927/g60492/g63746/g63869/g688/g8172	12	3	9
Biological process	GO:0009875	pollen-pistil interaction	25/2036	246/23933	0.20288	0.705776	g30946/g32638/g34455/g34457/g37858/g37909/g38718/g38789/g38802/g38809/g38896/g38898/g38907/g38933/g46386/g54108/g58999/g59002/g59003/g59004/g59257/g61086/g61092/g61094/g9711	25	17	8
Biological process	GO:0000103	sulfate assimilation	2/2036	10/23933	0.20677	0.705776	g29053/g59342	2	1	1
Biological process	GO:0006610	ribosomal protein import into nucleus	2/2036	10/23933	0.20677	0.705776	g511/g58850	2	1	1
Biological process	GO:0008215	spermine metabolic process	2/2036	10/23933	0.20677	0.705776	g1206/g57719	2	1	1
Biological process	GO:0009229	thiamine diphosphate biosynthetic process	2/2036	10/23933	0.20677	0.705776	g8172/g9966	2	1	1
Biological process	GO:0009435	NAD biosynthetic process	2/2036	10/23933	0.20677	0.705776	g33531/g33561	2	0	2
Biological process	GO:0009866	induced systemic resistance, ethylene mediated signaling pathway	2/2036	10/23933	0.20677	0.705776	g28289/g57627	2	0	2
Biological process	GO:0010117	photoprotection	2/2036	10/23933	0.20677	0.705776	g38746/g47736	2	0	2
Biological process	GO:0019756	cyanogenic glycoside biosynthetic process	2/2036	10/23933	0.20677	0.705776	g58619/g58629	2	0	2
Biological process	GO:0034311	diol metabolic process	2/2036	10/23933	0.20677	0.705776	g48971/g56381	2	0	2
Biological process	GO:0034312	diol biosynthetic process	2/2036	10/23933	0.20677	0.705776	g48971/g56381	2	0	2
Biological process	GO:0042341	cyanogenic glycoside metabolic process	2/2036	10/23933	0.20677	0.705776	g58619/g58629	2	0	2
Biological process	GO:0042357	thiamine diphosphate metabolic process	2/2036	10/23933	0.20677	0.705776	g8172/g9966	2	1	1
Biological process	GO:0080037	negative regulation of cytokinin-activated signaling pathway	2/2036	10/23933	0.20677	0.705776	g51430/g58352	2	0	2
Biological process	GO:1990067	intrachromosomal DNA recombination	2/2036	10/23933	0.20677	0.705776	g31128/g48089	2	2	0
Biological process	GO:0009067	aspartate family amino acid biosynthetic process	7/2036	57/23933	0.208395	0.710137	g18387/g19369/g19396/g25309/g25809/g27075/g63697	7	0	7
Biological process	GO:0010016	shoot system morphogenesis	27/2036	269/23933	0.2101	0.714759	g12194/g19234/g20482/g24823/g25386/g34263/g3436/g38373/g38441/g38488/g41215/g47203/g55174/g58207/g58531/g59507/g60691/g60968/g61321/g61322/g61366/g62127/g63729/g8886/g9121/g9508/g9874	27	7	20
Biological process	GO:0009965	leaf morphogenesis	15/2036	140/23933	0.210831	0.71595	g12194/g19234/g24823/g34263/g3436/g38488/g41215/g47203/g58207/g58531/g59507/g60691/g61366/g62127/g9874	15	5	10
Biological process	GO:0046164	alcohol catabolic process	4/2036	28/23933	0.211423	0.71595	g14407/g41764/g55256/g60684	4	0	4
Biological process	GO:1901699	cellular response to nitrogen compound	13/2036	119/23933	0.211499	0.71595	g21240/g21248/g25912/g26602/g29137/g30168/g37945/g41861/g50349/g54255/g57692/g61034/g63073	13	3	10
Biological process	GO:0008654	phospholipid biosynthetic process	19/2036	183/23933	0.213416	0.721246	g14125/g16196/g16744/g18417/g24221/g25746/g29257/g29283/g3478/g38646/g46632/g52434/g53373/g55156/g58125/g58886/g59244/g60737/g61263	19	5	14
Biological process	GO:1901000	regulation of response to salt stress	10/2036	88/23933	0.213775	0.721272	g17111/g28924/g28993/g3062/g3436/g41863/g41923/g60204/g60339/g60377	10	5	5
Biological process	GO:0009787	regulation of abscisic acid-activated signaling pathway	20/2036	194/23933	0.215116	0.722225	g17111/g19566/g20826/g28394/g2873/g29438/g29859/g3436/g40412/g42933/g43270/g43286/g4709/g47620/g50349/g5220/g61768/g61964/g7537/g9904	20	6	14
Biological process	GO:1901419	regulation of response to alcohol	20/2036	194/23933	0.215116	0.722225	g17111/g19566/g20826/g28394/g2873/g29438/g29859/g3436/g40412/g42933/g43270/g43286/g4709/g47620/g50349/g5220/g61768/g61964/g7537/g9904	20	6	14
Biological process	GO:1905957	regulation of cellular response to alcohol	20/2036	194/23933	0.215116	0.722225	g17111/g19566/g20826/g28394/g2873/g29438/g29859/g3436/g40412/g42933/g43270/g43286/g4709/g47620/g50349/g5220/g61768/g61964/g7537/g9904	20	6	14
Biological process	GO:0006779	porphyrin-containing compound biosynthetic process	12/2036	109/23933	0.215704	0.723015	g14249/g14255/g24823/g27271/g38959/g39213/g42876/g53373/g58521/g58531/g59566/g6549	12	1	11
Biological process	GO:0035966	response to topologically incorrect protein	5/2036	38/23933	0.218715	0.730868	g15882/g23983/g42800/g42933/g59165	5	3	2
Biological process	GO:0071215	cellular response to abscisic acid stimulus	43/2036	447/23933	0.219118	0.730868	g1104/g11068/g14749/g16785/g17111/g17270/g19566/g20291/g20826/g25316/g26905/g28394/g2873/g29438/g29557/g29859/g29911/g32638/g3436/g35554/g38441/g40412/g41139/g423/g42772/g42933/g43270/g43286/g4709/g47371/g47620/g50349/g5220/g54916/g57880/g58174/g60407/g61768/g61964/g7537/g767/g9904/g9931	43	16	27
Biological process	GO:0097306	cellular response to alcohol	43/2036	447/23933	0.219118	0.730868	g1104/g11068/g14749/g16785/g17111/g17270/g19566/g20291/g20826/g25316/g26905/g28394/g2873/g29438/g29557/g29859/g29911/g32638/g3436/g35554/g38441/g40412/g41139/g423/g42772/g42933/g43270/g43286/g4709/g47371/g47620/g50349/g5220/g54916/g57880/g58174/g60407/g61768/g61964/g7537/g767/g9904/g9931	43	16	27
Biological process	GO:0032504	multicellular organism reproduction	24/2036	238/23933	0.219655	0.730948	g16559/g16745/g19842/g21201/g248/g26525/g38641/g41926/g423/g47463/g48426/g50319/g5268/g55037/g55151/g55355/g58450/g59010/g60492/g61366/g6465/g806/g847/g9085	24	13	11
Biological process	GO:0046467	membrane lipid biosynthetic process	11/2036	99/23933	0.219856	0.730948	g16196/g17270/g26297/g3478/g42541/g56380/g56381/g56428/g58125/g59174/g59244	11	3	8
Biological process	GO:0009267	cellular response to starvation	16/2036	152/23933	0.22144	0.735022	g13115/g13947/g19369/g19396/g24748/g25912/g26140/g26297/g34420/g46302/g52884/g53985/g5442/g57692/g60258/g9491	16	2	14
Biological process	GO:0043902	positive regulation of multi-organism process	10/2036	89/23933	0.223884	0.741932	g1059/g1386/g17111/g29570/g3590/g37696/g42772/g5433/g61780/g9506	10	4	6
Biological process	GO:0000096	sulfur amino acid metabolic process	9/2036	79/23933	0.227681	0.753296	g18387/g19369/g19396/g29053/g35146/g53985/g57375/g59342/g767	9	1	8
Biological process	GO:0009624	response to nematode	11/2036	100/23933	0.229495	0.756129	g13503/g1613/g16702/g21204/g30129/g34438/g37408/g58077/g59390/g63729/g9057	11	4	7
Biological process	GO:0006661	phosphatidylinositol biosynthetic process	4/2036	29/23933	0.230014	0.756129	g16196/g3478/g55156/g59244	4	2	2
Biological process	GO:0010103	stomatal complex morphogenesis	4/2036	29/23933	0.230014	0.756129	g62127/g63729/g8886/g9508	4	1	3
Biological process	GO:0045930	negative regulation of mitotic cell cycle	4/2036	29/23933	0.230014	0.756129	g1041/g30821/g40610/g57703	4	1	3
Biological process	GO:0010374	stomatal complex development	7/2036	59/23933	0.233787	0.765474	g1086/g38710/g60581/g62127/g63729/g8886/g9508	7	1	6
Biological process	GO:0033014	tetrapyrrole biosynthetic process	12/2036	111/23933	0.234003	0.765474	g14249/g14255/g24823/g27271/g38959/g39213/g42876/g53373/g58521/g58531/g59566/g6549	12	1	11
Biological process	GO:0045859	regulation of protein kinase activity	10/2036	90/23933	0.234174	0.765474	g1104/g13057/g17369/g29911/g30422/g41861/g51955/g5386/g748/g9931	10	2	8
Biological process	GO:0071804	cellular potassium ion transport	5/2036	39/23933	0.234725	0.765474	g13677/g21204/g54899/g54900/g60783	5	4	1
Biological process	GO:0071805	potassium ion transmembrane transport	5/2036	39/23933	0.234725	0.765474	g13677/g21204/g54899/g54900/g60783	5	4	1
Biological process	GO:0071478	cellular response to radiation	21/2036	208/23933	0.236456	0.765814	g20638/g21637/g25517/g30850/g30973/g34795/g35141/g4159/g41799/g43226/g43659/g43804/g47182/g49841/g55106/g59627/g60922/g8906/g9006/g9121/g932	21	5	16
Biological process	GO:0006086	acetyl-CoA biosynthetic process from pyruvate	2/2036	11/23933	0.239288	0.765814	g49533/g49978	2	0	2
Biological process	GO:0006572	tyrosine catabolic process	2/2036	11/23933	0.239288	0.765814	g54240/g54433	2	1	1
Biological process	GO:0009871	jasmonic acid and ethylene-dependent systemic resistance, ethylene mediated signaling pathway	2/2036	11/23933	0.239288	0.765814	g28289/g57627	2	0	2
Biological process	GO:0043097	pyrimidine nucleoside salvage	2/2036	11/23933	0.239288	0.765814	g12899/g53927	2	1	1
Biological process	GO:0045861	negative regulation of proteolysis	2/2036	11/23933	0.239288	0.765814	g18125/g7794	2	1	1
Biological process	GO:0050898	nitrile metabolic process	2/2036	11/23933	0.239288	0.765814	g58619/g58629	2	0	2
Biological process	GO:0080028	nitrile biosynthetic process	2/2036	11/23933	0.239288	0.765814	g58619/g58629	2	0	2
Biological process	GO:0032875	regulation of DNA endoreduplication	3/2036	20/23933	0.239317	0.765814	g53661/g59927/g63073	3	0	3
Biological process	GO:0070370	cellular heat acclimation	3/2036	20/23933	0.239317	0.765814	g24541/g24710/g62127	3	2	1
Biological process	GO:1902456	regulation of stomatal opening	3/2036	20/23933	0.239317	0.765814	g47779/g4916/g51955	3	1	2
Biological process	GO:1990069	stomatal opening	3/2036	20/23933	0.239317	0.765814	g47779/g4916/g51955	3	1	2
Biological process	GO:0045860	positive regulation of protein kinase activity	8/2036	70/23933	0.243032	0.776491	g1104/g13057/g17369/g29911/g41861/g51955/g748/g9931	8	2	6
Biological process	GO:0000281	mitotic cytokinesis	13/2036	123/23933	0.246638	0.786782	g13325/g1613/g24246/g31666/g39267/g43064/g43652/g43654/g49798/g54735/g59712/g63729/g847	13	1	12
Biological process	GO:0009129	pyrimidine nucleoside monophosphate metabolic process	4/2036	30/23933	0.248987	0.790186	g12899/g53927/g57284/g58558	4	1	3
Biological process	GO:0009861	jasmonic acid and ethylene-dependent systemic resistance	4/2036	30/23933	0.248987	0.790186	g28289/g45992/g46002/g57627	4	1	3
Biological process	GO:0009903	chloroplast avoidance movement	4/2036	30/23933	0.248987	0.790186	g25460/g41799/g51183/g58793	4	0	4
Biological process	GO:0051347	positive regulation of transferase activity	11/2036	102/23933	0.249248	0.790186	g1104/g13057/g17369/g29911/g41861/g51955/g748/g7593/g849/g850/g9931	11	2	9
Biological process	GO:0009765	photosynthesis, light harvesting	5/2036	40/23933	0.251049	0.79344	g280/g30850/g39043/g54350/g60543	5	0	5
Biological process	GO:0009767	photosynthetic electron transport chain	5/2036	40/23933	0.251049	0.79344	g15752/g19548/g31490/g42791/g50500	5	0	5
Biological process	GO:0010565	regulation of cellular ketone metabolic process	12/2036	113/23933	0.252881	0.797996	g14125/g17144/g17702/g29126/g3436/g34795/g38960/g41748/g42002/g52884/g58667/g60256	12	1	11
Biological process	GO:0001934	positive regulation of protein phosphorylation	8/2036	71/23933	0.255188	0.803025	g1104/g13057/g17369/g29911/g41861/g51955/g748/g9931	8	2	6
Biological process	GO:0022412	cellular process involved in reproduction in multicellular organism	10/2036	92/23933	0.255259	0.803025	g16559/g19842/g248/g26525/g47463/g48426/g50319/g5268/g59010/g847	10	4	6
Biological process	GO:0009145	purine nucleoside triphosphate biosynthetic process	14/2036	135/23933	0.258019	0.809222	g21456/g32874/g39707/g39788/g45357/g49533/g49978/g50952/g58124/g58139/g59328/g60033/g61/g61019	14	1	13
Biological process	GO:0009206	purine ribonucleoside triphosphate biosynthetic process	14/2036	135/23933	0.258019	0.809222	g21456/g32874/g39707/g39788/g45357/g49533/g49978/g50952/g58124/g58139/g59328/g60033/g61/g61019	14	1	13
Biological process	GO:0048598	embryonic morphogenesis	7/2036	61/23933	0.260133	0.814605	g12194/g25936/g34263/g38488/g39389/g59507/g60691	7	1	6
Biological process	GO:0002684	positive regulation of immune system process	17/2036	168/23933	0.262244	0.817001	g1386/g17111/g18302/g2168/g28289/g36877/g37945/g39893/g42615/g50120/g50123/g50130/g50180/g50186/g57627/g59025/g61781	17	9	8
Biological process	GO:0050778	positive regulation of immune response	17/2036	168/23933	0.262244	0.817001	g1386/g17111/g18302/g2168/g28289/g36877/g37945/g39893/g42615/g50120/g50123/g50130/g50180/g50186/g57627/g59025/g61781	17	9	8
Biological process	GO:0051181	cofactor transport	3/2036	21/23933	0.262933	0.817001	g21545/g4415/g8732	3	1	2
Biological process	GO:0090329	regulation of DNA-dependent DNA replication	3/2036	21/23933	0.262933	0.817001	g53661/g59927/g63073	3	0	3
Biological process	GO:1903320	regulation of protein modification by small protein conjugation or removal	3/2036	21/23933	0.262933	0.817001	g7593/g849/g850	3	0	3
Biological process	GO:0048511	rhythmic process	26/2036	267/23933	0.26332	0.817001	g11537/g1386/g17207/g24312/g24753/g24894/g25517/g25584/g2767/g2896/g30418/g30909/g30927/g30973/g31138/g31552/g31556/g33906/g33907/g36554/g4159/g43672/g47182/g48715/g51716/g55796	26	12	14
Biological process	GO:0009112	nucleobase metabolic process	6/2036	51/23933	0.264488	0.817001	g12899/g46302/g50946/g53927/g57284/g63746	6	1	5
Biological process	GO:0009309	amine biosynthetic process	6/2036	51/23933	0.264488	0.817001	g1206/g21558/g25524/g41748/g44868/g48726	6	1	5
Biological process	GO:0042401	cellular biogenic amine biosynthetic process	6/2036	51/23933	0.264488	0.817001	g1206/g21558/g25524/g41748/g44868/g48726	6	1	5
Biological process	GO:0009834	plant-type secondary cell wall biogenesis	10/2036	93/23933	0.266033	0.820042	g25179/g25541/g30608/g34731/g41748/g41992/g46294/g59138/g59654/g739	10	3	7
Biological process	GO:0046488	phosphatidylinositol metabolic process	8/2036	72/23933	0.267527	0.820042	g16196/g3478/g39296/g55156/g55559/g59217/g59244/g60160	8	3	5
Biological process	GO:0006595	polyamine metabolic process	4/2036	31/23933	0.268276	0.820042	g1206/g21558/g44868/g57719	4	1	3
Biological process	GO:0006783	heme biosynthetic process	4/2036	31/23933	0.268276	0.820042	g27271/g38959/g39213/g59566	4	0	4
Biological process	GO:0006863	purine nucleobase transport	4/2036	31/23933	0.268276	0.820042	g37408/g42055/g42056/g42058	4	4	0
Biological process	GO:0009566	fertilization	4/2036	31/23933	0.268276	0.820042	g40271/g47463/g5433/g9506	4	0	4
Biological process	GO:0009864	induced systemic resistance, jasmonic acid mediated signaling pathway	4/2036	31/23933	0.268276	0.820042	g1386/g18302/g2168/g37945	4	2	2
Biological process	GO:0098771	inorganic ion homeostasis	33/2036	346/23933	0.270327	0.822461	g1041/g12555/g16737/g17637/g17649/g24748/g25233/g25379/g26605/g27278/g3062/g30659/g31934/g34061/g34297/g39025/g39389/g43966/g47736/g52884/g54899/g54900/g55136/g57692/g59385/g60042/g60204/g60783/g62271/g63816/g64112/g7006/g7253	33	9	24
Biological process	GO:0009939	positive regulation of gibberellic acid mediated signaling pathway	2/2036	12/23933	0.272016	0.822461	g5433/g9506	2	0	2
Biological process	GO:0010444	guard mother cell differentiation	2/2036	12/23933	0.272016	0.822461	g1086/g38710	2	0	2
Biological process	GO:0015743	malate transport	2/2036	12/23933	0.272016	0.822461	g29833/g59385	2	0	2
Biological process	GO:0032988	ribonucleoprotein complex disassembly	2/2036	12/23933	0.272016	0.822461	g17207/g23153	2	1	1
Biological process	GO:0042182	ketone catabolic process	2/2036	12/23933	0.272016	0.822461	g12213/g25427	2	1	1
Biological process	GO:0055078	sodium ion homeostasis	2/2036	12/23933	0.272016	0.822461	g3062/g60204	2	0	2
Biological process	GO:0031401	positive regulation of protein modification process	12/2036	115/23933	0.272279	0.822461	g1104/g13057/g17369/g29911/g34795/g41861/g51955/g748/g7593/g849/g850/g9931	12	2	10
Biological process	GO:0060560	developmental growth involved in morphogenesis	39/2036	414/23933	0.274718	0.828604	g1049/g12658/g13057/g14373/g16196/g186/g18834/g20212/g24446/g25696/g26525/g27129/g27144/g28250/g30418/g31398/g34802/g35276/g39309/g40271/g41748/g43062/g43658/g47776/g4983/g50413/g50451/g53293/g54101/g5446/g55136/g56590/g56783/g57569/g59314/g60016/g63729/g8147/g9121	39	14	25
Biological process	GO:0045893	positive regulation of transcription, DNA-templated	45/2036	482/23933	0.277213	0.834899	g11240/g11247/g13822/g14749/g16785/g19302/g19358/g19571/g20388/g20638/g2168/g2316/g24003/g25699/g25936/g27214/g29136/g29137/g29145/g29859/g30783/g31713/g33906/g34250/g3436/g34795/g388/g3899/g41215/g42813/g47203/g49022/g5499/g58174/g58391/g59138/g59550/g60059/g62835/g63073/g63231/g6355/g932/g9465/g9904	45	14	31
Biological process	GO:0031668	cellular response to extracellular stimulus	22/2036	225/23933	0.278119	0.836398	g13115/g13947/g18243/g19369/g19396/g24748/g25912/g26140/g26297/g34420/g38441/g46302/g4704/g5071/g50946/g52884/g53985/g5442/g55662/g57692/g60258/g9491	22	4	18
Biological process	GO:1905421	regulation of plant organ morphogenesis	6/2036	52/23933	0.279407	0.839041	g19234/g25936/g34061/g3436/g39389/g62127	6	2	4
Biological process	GO:1902680	positive regulation of RNA biosynthetic process	45/2036	483/23933	0.282011	0.842587	g11240/g11247/g13822/g14749/g16785/g19302/g19358/g19571/g20388/g20638/g2168/g2316/g24003/g25699/g25936/g27214/g29136/g29137/g29145/g29859/g30783/g31713/g33906/g34250/g3436/g34795/g388/g3899/g41215/g42813/g47203/g49022/g5499/g58174/g58391/g59138/g59550/g60059/g62835/g63073/g63231/g6355/g932/g9465/g9904	45	14	31
Biological process	GO:1903508	positive regulation of nucleic acid-templated transcription	45/2036	483/23933	0.282011	0.842587	g11240/g11247/g13822/g14749/g16785/g19302/g19358/g19571/g20388/g20638/g2168/g2316/g24003/g25699/g25936/g27214/g29136/g29137/g29145/g29859/g30783/g31713/g33906/g34250/g3436/g34795/g388/g3899/g41215/g42813/g47203/g49022/g5499/g58174/g58391/g59138/g59550/g60059/g62835/g63073/g63231/g6355/g932/g9465/g9904	45	14	31
Biological process	GO:0006879	cellular iron ion homeostasis	5/2036	42/23933	0.284472	0.842587	g24748/g34297/g57692/g60042/g7253	5	0	5
Biological process	GO:1900425	negative regulation of defense response to bacterium	5/2036	42/23933	0.284472	0.842587	g17164/g25720/g40975/g50155/g60581	5	2	3
Biological process	GO:0009642	response to light intensity	14/2036	138/23933	0.28494	0.842587	g1386/g24312/g30850/g30973/g31281/g31490/g34438/g36554/g36835/g38746/g42987/g50500/g58561/g60170	14	1	13
Biological process	GO:0002213	defense response to insect	3/2036	22/23933	0.286816	0.842587	g1386/g14749/g4532	3	0	3
Biological process	GO:0009638	phototropism	3/2036	22/23933	0.286816	0.842587	g23682/g38154/g5105	3	1	2
Biological process	GO:0009938	negative regulation of gibberellic acid mediated signaling pathway	3/2036	22/23933	0.286816	0.842587	g38859/g59766/g9904	3	1	2
Biological process	GO:0010216	maintenance of DNA methylation	3/2036	22/23933	0.286816	0.842587	g17497/g32681/g64138	3	0	3
Biological process	GO:0010232	vascular transport	3/2036	22/23933	0.286816	0.842587	g50316/g59947/g59948	3	0	3
Biological process	GO:0010233	phloem transport	3/2036	22/23933	0.286816	0.842587	g50316/g59947/g59948	3	0	3
Biological process	GO:0019674	NAD metabolic process	3/2036	22/23933	0.286816	0.842587	g11388/g33531/g33561	3	0	3
Biological process	GO:0032958	inositol phosphate biosynthetic process	3/2036	22/23933	0.286816	0.842587	g38366/g51915/g52138	3	2	1
Biological process	GO:0051238	sequestering of metal ion	3/2036	22/23933	0.286816	0.842587	g34297/g60042/g7253	3	0	3
Biological process	GO:1900376	regulation of secondary metabolite biosynthetic process	3/2036	22/23933	0.286816	0.842587	g20424/g24003/g41992	3	1	2
Biological process	GO:0009644	response to high light intensity	7/2036	63/23933	0.287266	0.842587	g24312/g31281/g31490/g38746/g42987/g50500/g58561	7	1	6
Biological process	GO:0015851	nucleobase transport	4/2036	32/23933	0.287816	0.842587	g37408/g42055/g42056/g42058	4	4	0
Biological process	GO:0001932	regulation of protein phosphorylation	10/2036	95/23933	0.287994	0.842587	g1104/g13057/g17369/g29911/g30422/g41861/g51955/g5386/g748/g9931	10	2	8
Biological process	GO:0046323	glucose import	6/2036	53/23933	0.29451	0.857378	g11678/g22941/g60482/g6980/g7087/g9511	6	2	4
Biological process	GO:0055088	lipid homeostasis	6/2036	53/23933	0.29451	0.857378	g12847/g14407/g25519/g41764/g58653/g60684	6	1	5
Biological process	GO:0019953	sexual reproduction	17/2036	172/23933	0.294681	0.857378	g16559/g19842/g24246/g248/g26525/g27129/g27144/g38362/g40271/g47463/g48426/g50319/g5268/g5433/g59010/g847/g9506	17	4	13
Biological process	GO:0009142	nucleoside triphosphate biosynthetic process	16/2036	161/23933	0.294724	0.857378	g12899/g21456/g32874/g39707/g39788/g45357/g49533/g49978/g50952/g53927/g58124/g58139/g59328/g60033/g61/g61019	16	2	14
Biological process	GO:0016106	sesquiterpenoid biosynthetic process	5/2036	43/23933	0.301489	0.867721	g17260/g31036/g3436/g43412/g54338	5	0	5
Biological process	GO:1901990	regulation of mitotic cell cycle phase transition	5/2036	43/23933	0.301489	0.867721	g26893/g30821/g40610/g50927/g61366	5	1	4
Biological process	GO:0051273	beta-glucan metabolic process	13/2036	129/23933	0.302974	0.867721	g12645/g14373/g18508/g19559/g20790/g35029/g39267/g43027/g49798/g53594/g54735/g5496/g61205	13	2	11
Biological process	GO:0010100	negative regulation of photomorphogenesis	2/2036	13/23933	0.304684	0.867721	g401/g42630	2	0	2
Biological process	GO:0010196	nonphotochemical quenching	2/2036	13/23933	0.304684	0.867721	g23293/g23299	2	0	2
Biological process	GO:0010205	photoinhibition	2/2036	13/23933	0.304684	0.867721	g31490/g50500	2	0	2
Biological process	GO:0010332	response to gamma radiation	2/2036	13/23933	0.304684	0.867721	g34795/g43226	2	0	2
Biological process	GO:0015696	ammonium transport	2/2036	13/23933	0.304684	0.867721	g42460/g8186	2	1	1
Biological process	GO:0032876	negative regulation of DNA endoreduplication	2/2036	13/23933	0.304684	0.867721	g53661/g59927	2	0	2
Biological process	GO:0043155	negative regulation of photosynthesis, light reaction	2/2036	13/23933	0.304684	0.867721	g31490/g50500	2	0	2
Biological process	GO:0043618	regulation of transcription from RNA polymerase II promoter in response to stress	2/2036	13/23933	0.304684	0.867721	g14749/g23966	2	0	2
Biological process	GO:0048759	xylem vessel member cell differentiation	2/2036	13/23933	0.304684	0.867721	g21558/g44868	2	0	2
Biological process	GO:0070413	trehalose metabolism in response to stress	2/2036	13/23933	0.304684	0.867721	g37631/g49876	2	0	2
Biological process	GO:1990066	energy quenching	2/2036	13/23933	0.304684	0.867721	g23293/g23299	2	0	2
Biological process	GO:2000068	regulation of defense response to insect	2/2036	13/23933	0.304684	0.867721	g1386/g14749	2	0	2
Biological process	GO:0018298	protein-chromophore linkage	8/2036	75/23933	0.305482	0.867721	g24312/g25584/g280/g39043/g43672/g54350/g5489/g9476	8	2	6
Biological process	GO:0048767	root hair elongation	8/2036	75/23933	0.305482	0.867721	g12658/g26525/g30418/g34802/g50451/g56590/g56783/g63729	8	3	5
Biological process	GO:0030641	regulation of cellular pH	4/2036	33/23933	0.307544	0.868522	g54899/g54900/g59385/g60783	4	2	2
Biological process	GO:0043173	nucleotide salvage	4/2036	33/23933	0.307544	0.868522	g12899/g34248/g53927/g63869	4	2	2
Biological process	GO:0046653	tetrahydrofolate metabolic process	4/2036	33/23933	0.307544	0.868522	g24385/g44161/g48971/g54963	4	1	3
Biological process	GO:0051453	regulation of intracellular pH	4/2036	33/23933	0.307544	0.868522	g54899/g54900/g59385/g60783	4	2	2
Biological process	GO:1901987	regulation of cell cycle phase transition	6/2036	54/23933	0.309769	0.868522	g26893/g30821/g40610/g48089/g50927/g61366	6	2	4
Biological process	GO:1904659	glucose transmembrane transport	6/2036	54/23933	0.309769	0.868522	g11678/g22941/g60482/g6980/g7087/g9511	6	2	4
Biological process	GO:0009119	ribonucleoside metabolic process	10/2036	97/23933	0.31043	0.868522	g1206/g12899/g14135/g19898/g19973/g29366/g53927/g55182/g63869/g7921	10	3	7
Biological process	GO:0000162	tryptophan biosynthetic process	3/2036	23/23933	0.310853	0.868522	g25524/g41748/g48726	3	0	3
Biological process	GO:0007093	mitotic cell cycle checkpoint	3/2036	23/23933	0.310853	0.868522	g30821/g40610/g57703	3	0	3
Biological process	GO:0010065	primary meristem tissue development	3/2036	23/23933	0.310853	0.868522	g20482/g25386/g60990	3	1	2
Biological process	GO:0042548	regulation of photosynthesis, light reaction	3/2036	23/23933	0.310853	0.868522	g31490/g36554/g50500	3	0	3
Biological process	GO:0046219	indolalkylamine biosynthetic process	3/2036	23/23933	0.310853	0.868522	g25524/g41748/g48726	3	0	3
Biological process	GO:0002252	immune effector process	11/2036	108/23933	0.311682	0.869651	g11120/g13253/g1386/g16901/g18302/g2168/g25261/g28289/g37945/g4528/g57627	11	4	7
Biological process	GO:0045595	regulation of cell differentiation	12/2036	119/23933	0.312397	0.87046	g24003/g25936/g31398/g39389/g42120/g42128/g43062/g50413/g57569/g60072/g60090/g670	12	4	8
Biological process	GO:0000266	mitochondrial fission	5/2036	44/23933	0.318656	0.885493	g15335/g43652/g43654/g57076/g57082	5	0	5
Biological process	GO:0044764	multi-organism cellular process	5/2036	44/23933	0.318656	0.885493	g41368/g48949/g48951/g55729/g55730	5	1	4
Biological process	GO:0007276	gamete generation	9/2036	87/23933	0.320524	0.888427	g16559/g19842/g248/g26525/g48426/g50319/g5268/g59010/g847	9	4	5
Biological process	GO:0003002	regionalization	21/2036	220/23933	0.322825	0.888427	g10099/g1041/g15862/g16757/g26328/g30038/g31128/g34263/g38362/g38488/g41404/g41709/g41992/g423/g48089/g50316/g58340/g59507/g60691/g62127/g62966	21	9	12
Biological process	GO:0009853	photorespiration	6/2036	55/23933	0.325155	0.888427	g18243/g23312/g23327/g5071/g60492/g688	6	1	5
Biological process	GO:0071496	cellular response to external stimulus	23/2036	243/23933	0.327082	0.888427	g13115/g13947/g18243/g19369/g19396/g24748/g25912/g26140/g26297/g34420/g38441/g46302/g4704/g5071/g50946/g52884/g53985/g5442/g55662/g57692/g60258/g9491/g9516	23	5	18
Biological process	GO:0006662	glycerol ether metabolic process	4/2036	34/23933	0.3274	0.888427	g2123/g24994/g41751/g47199	4	3	1
Biological process	GO:0033692	cellular polysaccharide biosynthetic process	21/2036	221/23933	0.330415	0.888427	g1074/g14373/g20388/g20541/g20790/g34731/g39116/g39267/g42632/g43027/g46294/g49798/g50626/g50761/g53594/g54735/g54875/g55556/g59654/g739/g9975	21	5	16
Biological process	GO:0045489	pectin biosynthetic process	8/2036	77/23933	0.3314	0.888427	g43027/g49799/g50626/g50643/g50761/g53159/g54875/g58748	8	3	5
Biological process	GO:0010053	root epidermal cell differentiation	13/2036	132/23933	0.332388	0.888427	g12658/g13583/g186/g21456/g26525/g30418/g33085/g34802/g50451/g56590/g56783/g61019/g63729	13	3	10
Biological process	GO:0046474	glycerophospholipid biosynthetic process	9/2036	88/23933	0.332685	0.888427	g16196/g18417/g24221/g3478/g46632/g52434/g55156/g59244/g61263	9	4	5
Biological process	GO:0005983	starch catabolic process	3/2036	24/23933	0.334941	0.888427	g32506/g38321/g8183	3	0	3
Biological process	GO:0009263	deoxyribonucleotide biosynthetic process	3/2036	24/23933	0.334941	0.888427	g54068/g58558/g64070	3	0	3
Biological process	GO:0009691	cytokinin biosynthetic process	3/2036	24/23933	0.334941	0.888427	g1394/g1395/g60538	3	1	2
Biological process	GO:0010192	mucilage biosynthetic process	3/2036	24/23933	0.334941	0.888427	g47690/g47691/g53159	3	0	3
Biological process	GO:1902749	regulation of cell cycle G2/M phase transition	3/2036	24/23933	0.334941	0.888427	g26893/g48089/g61366	3	2	1
Biological process	GO:0045492	xylan biosynthetic process	5/2036	45/23933	0.335935	0.888427	g20388/g34731/g46294/g59654/g739	5	1	4
Biological process	GO:0042594	response to starvation	17/2036	177/23933	0.336836	0.888427	g13115/g13947/g19369/g19396/g24748/g25912/g26140/g26297/g34420/g41992/g46302/g52884/g53985/g5442/g57692/g60258/g9491	17	2	15
Biological process	GO:0006108	malate metabolic process	2/2036	14/23933	0.337064	0.888427	g13124/g54264	2	0	2
Biological process	GO:0007094	mitotic spindle assembly checkpoint	2/2036	14/23933	0.337064	0.888427	g30821/g40610	2	0	2
Biological process	GO:0008156	negative regulation of DNA replication	2/2036	14/23933	0.337064	0.888427	g53661/g59927	2	0	2
Biological process	GO:0009635	response to herbicide	2/2036	14/23933	0.337064	0.888427	g15581/g15582	2	0	2
Biological process	GO:0009785	blue light signaling pathway	2/2036	14/23933	0.337064	0.888427	g55106/g60922	2	0	2
Biological process	GO:0010148	transpiration	2/2036	14/23933	0.337064	0.888427	g25036/g62127	2	2	0
Biological process	GO:0010206	photosystem II repair	2/2036	14/23933	0.337064	0.888427	g30850/g60543	2	0	2
Biological process	GO:0010412	mannan metabolic process	2/2036	14/23933	0.337064	0.888427	g29341/g60495	2	0	2
Biological process	GO:0019287	isopentenyl diphosphate biosynthetic process, mevalonate pathway	2/2036	14/23933	0.337064	0.888427	g25746/g60737	2	0	2
Biological process	GO:0030522	intracellular receptor signaling pathway	2/2036	14/23933	0.337064	0.888427	g55106/g60922	2	0	2
Biological process	GO:0031577	spindle checkpoint	2/2036	14/23933	0.337064	0.888427	g30821/g40610	2	0	2
Biological process	GO:0032351	negative regulation of hormone metabolic process	2/2036	14/23933	0.337064	0.888427	g41882/g52884	2	0	2
Biological process	GO:0032353	negative regulation of hormone biosynthetic process	2/2036	14/23933	0.337064	0.888427	g41882/g52884	2	0	2
Biological process	GO:0033356	UDP-L-arabinose metabolic process	2/2036	14/23933	0.337064	0.888427	g39116/g53211	2	1	1
Biological process	GO:0043478	pigment accumulation in response to UV light	2/2036	14/23933	0.337064	0.888427	g33085/g58077	2	1	1
Biological process	GO:0043479	pigment accumulation in tissues in response to UV light	2/2036	14/23933	0.337064	0.888427	g33085/g58077	2	1	1
Biological process	GO:0043480	pigment accumulation in tissues	2/2036	14/23933	0.337064	0.888427	g33085/g58077	2	1	1
Biological process	GO:0043481	anthocyanin accumulation in tissues in response to UV light	2/2036	14/23933	0.337064	0.888427	g33085/g58077	2	1	1
Biological process	GO:0048658	anther wall tapetum development	2/2036	14/23933	0.337064	0.888427	g25519/g30119	2	0	2
Biological process	GO:0071173	spindle assembly checkpoint	2/2036	14/23933	0.337064	0.888427	g30821/g40610	2	0	2
Biological process	GO:0071174	mitotic spindle checkpoint	2/2036	14/23933	0.337064	0.888427	g30821/g40610	2	0	2
Biological process	GO:1902652	secondary alcohol metabolic process	2/2036	14/23933	0.337064	0.888427	g11630/g16874	2	1	1
Biological process	GO:1902653	secondary alcohol biosynthetic process	2/2036	14/23933	0.337064	0.888427	g11630/g16874	2	1	1
Biological process	GO:2000104	negative regulation of DNA-dependent DNA replication	2/2036	14/23933	0.337064	0.888427	g53661/g59927	2	0	2
Biological process	GO:0055076	transition metal ion homeostasis	19/2036	200/23933	0.341765	0.898505	g1041/g12555/g16737/g24748/g25233/g26605/g27278/g30659/g31934/g34061/g34297/g39025/g43966/g57692/g60042/g62271/g63816/g7006/g7253	19	5	14
Biological process	GO:0071482	cellular response to light stimulus	19/2036	200/23933	0.341765	0.898505	g20638/g21637/g25517/g30850/g30973/g35141/g4159/g41799/g43659/g43804/g47182/g49841/g55106/g59627/g60922/g8906/g9006/g9121/g932	19	5	14
Biological process	GO:0070592	cell wall polysaccharide biosynthetic process	8/2036	78/23933	0.344494	0.904517	g20388/g34731/g46294/g50626/g50761/g54875/g59654/g739	8	1	7
Biological process	GO:0006084	acetyl-CoA metabolic process	4/2036	35/23933	0.347326	0.910786	g25746/g49533/g49978/g60737	4	0	4
Biological process	GO:0030258	lipid modification	15/2036	156/23933	0.348998	0.912833	g23818/g32222/g34394/g39296/g40236/g4952/g5220/g54221/g54581/g55229/g55559/g55653/g56601/g59217/g60160	15	5	10
Biological process	GO:0090627	plant epidermal cell differentiation	15/2036	156/23933	0.348998	0.912833	g1086/g12658/g13583/g186/g21456/g26525/g30418/g33085/g34802/g38710/g50451/g56590/g56783/g61019/g63729	15	3	12
Biological process	GO:0006643	membrane lipid metabolic process	12/2036	123/23933	0.353848	0.923779	g16196/g17270/g26297/g3478/g42541/g56380/g56381/g56428/g58125/g59174/g59244/g60818	12	4	8
Biological process	GO:0044703	multi-organism reproductive process	17/2036	179/23933	0.354085	0.923779	g16559/g19842/g24246/g248/g26525/g27129/g27144/g38362/g40271/g47463/g48426/g50319/g5268/g5433/g59010/g847/g9506	17	4	13
Biological process	GO:0009648	photoperiodism	20/2036	213/23933	0.355736	0.925215	g1386/g16281/g24574/g25517/g27600/g2767/g28257/g2896/g30973/g33906/g33907/g38556/g43455/g47745/g49841/g49910/g5248/g57590/g5858/g58777	20	8	12
Biological process	GO:0000302	response to reactive oxygen species	19/2036	202/23933	0.358054	0.925215	g11639/g1386/g14222/g17073/g19571/g23246/g25021/g25912/g29047/g31281/g38441/g41626/g44130/g50349/g50433/g53874/g57692/g58777/g60739	19	5	14
Biological process	GO:0000038	very long-chain fatty acid metabolic process	3/2036	25/23933	0.358985	0.925215	g17270/g39054/g7933	3	1	2
Biological process	GO:0006505	GPI anchor metabolic process	3/2036	25/23933	0.358985	0.925215	g16196/g3478/g59244	3	2	1
Biological process	GO:0006506	GPI anchor biosynthetic process	3/2036	25/23933	0.358985	0.925215	g16196/g3478/g59244	3	2	1
Biological process	GO:0009147	pyrimidine nucleoside triphosphate metabolic process	3/2036	25/23933	0.358985	0.925215	g12899/g53927/g58558	3	1	2
Biological process	GO:0009173	pyrimidine ribonucleoside monophosphate metabolic process	3/2036	25/23933	0.358985	0.925215	g12899/g53927/g57284	3	1	2
Biological process	GO:0010078	maintenance of root meristem identity	3/2036	25/23933	0.358985	0.925215	g11240/g11247/g62835	3	3	0
Biological process	GO:0009124	nucleoside monophosphate biosynthetic process	18/2036	192/23933	0.368854	0.925215	g12899/g21456/g32874/g39707/g39788/g45357/g49533/g49978/g50952/g53927/g58124/g58139/g58558/g59328/g60033/g61/g61019/g63869	18	2	16
Biological process	GO:0009804	coumarin metabolic process	2/2036	15/23933	0.36897	0.925215	g11639/g58655	2	0	2
Biological process	GO:0009805	coumarin biosynthetic process	2/2036	15/23933	0.36897	0.925215	g11639/g58655	2	0	2
Biological process	GO:0015693	magnesium ion transport	2/2036	15/23933	0.36897	0.925215	g43731/g47736	2	1	1
Biological process	GO:0019374	galactolipid metabolic process	2/2036	15/23933	0.36897	0.925215	g26297/g60818	2	2	0
Biological process	GO:0033046	negative regulation of sister chromatid segregation	2/2036	15/23933	0.36897	0.925215	g30821/g40610	2	0	2
Biological process	GO:0033048	negative regulation of mitotic sister chromatid segregation	2/2036	15/23933	0.36897	0.925215	g30821/g40610	2	0	2
Biological process	GO:0042372	phylloquinone biosynthetic process	2/2036	15/23933	0.36897	0.925215	g50425/g59172	2	1	1
Biological process	GO:0042374	phylloquinone metabolic process	2/2036	15/23933	0.36897	0.925215	g50425/g59172	2	1	1
Biological process	GO:0042761	very long-chain fatty acid biosynthetic process	2/2036	15/23933	0.36897	0.925215	g17270/g7933	2	1	1
Biological process	GO:0043473	pigmentation	2/2036	15/23933	0.36897	0.925215	g33085/g58077	2	1	1
Biological process	GO:0043476	pigment accumulation	2/2036	15/23933	0.36897	0.925215	g33085/g58077	2	1	1
Biological process	GO:0045839	negative regulation of mitotic nuclear division	2/2036	15/23933	0.36897	0.925215	g30821/g40610	2	0	2
Biological process	GO:0045841	negative regulation of mitotic metaphase/anaphase transition	2/2036	15/23933	0.36897	0.925215	g30821/g40610	2	0	2
Biological process	GO:0048832	specification of plant organ number	2/2036	15/23933	0.36897	0.925215	g26328/g41709	2	0	2
Biological process	GO:0048833	specification of floral organ number	2/2036	15/23933	0.36897	0.925215	g26328/g41709	2	0	2
Biological process	GO:0051176	positive regulation of sulfur metabolic process	2/2036	15/23933	0.36897	0.925215	g33531/g33561	2	0	2
Biological process	GO:0051985	negative regulation of chromosome segregation	2/2036	15/23933	0.36897	0.925215	g30821/g40610	2	0	2
Biological process	GO:0098661	inorganic anion transmembrane transport	2/2036	15/23933	0.36897	0.925215	g29833/g677	2	0	2
Biological process	GO:1902100	negative regulation of metaphase/anaphase transition of cell cycle	2/2036	15/23933	0.36897	0.925215	g30821/g40610	2	0	2
Biological process	GO:1905819	negative regulation of chromosome separation	2/2036	15/23933	0.36897	0.925215	g30821/g40610	2	0	2
Biological process	GO:2000816	negative regulation of mitotic sister chromatid separation	2/2036	15/23933	0.36897	0.925215	g30821/g40610	2	0	2
Biological process	GO:0010224	response to UV-B	14/2036	147/23933	0.370028	0.925215	g14222/g25519/g25584/g30909/g34606/g34735/g43285/g43672/g48/g53252/g56787/g59627/g60739/g986	14	7	7
Biological process	GO:0006665	sphingolipid metabolic process	5/2036	47/23933	0.370675	0.925215	g17270/g56380/g56381/g56428/g59174	5	0	5
Biological process	GO:0044038	cell wall macromolecule biosynthetic process	8/2036	80/23933	0.37087	0.925215	g20388/g34731/g46294/g50626/g50761/g54875/g59654/g739	8	1	7
Biological process	GO:0070589	cellular component macromolecule biosynthetic process	8/2036	80/23933	0.37087	0.925215	g20388/g34731/g46294/g50626/g50761/g54875/g59654/g739	8	1	7
Biological process	GO:0002237	response to molecule of bacterial origin	7/2036	69/23933	0.371699	0.925215	g31550/g34066/g3590/g50155/g50349/g51746/g59025	7	2	5
Biological process	GO:0034219	carbohydrate transmembrane transport	7/2036	69/23933	0.371699	0.925215	g11678/g22941/g34438/g60482/g6980/g7087/g9511	7	2	5
Biological process	GO:0008645	hexose transmembrane transport	6/2036	58/23933	0.371803	0.925215	g11678/g22941/g60482/g6980/g7087/g9511	6	2	4
Biological process	GO:0044772	mitotic cell cycle phase transition	6/2036	58/23933	0.371803	0.925215	g26893/g30821/g38710/g40610/g50927/g61366	6	1	5
Biological process	GO:0000271	polysaccharide biosynthetic process	25/2036	272/23933	0.372882	0.926776	g1074/g14373/g20388/g20541/g20790/g34731/g39116/g39267/g42632/g43027/g46294/g49798/g49799/g50626/g50643/g50761/g53159/g53594/g54735/g54875/g55556/g58748/g59654/g739/g9975	25	8	17
Biological process	GO:0050776	regulation of immune response	24/2036	261/23933	0.375712	0.932676	g13640/g1386/g17111/g18302/g2168/g24003/g24750/g25720/g28289/g36877/g37945/g39893/g41861/g42615/g45992/g46002/g50120/g50123/g50130/g50180/g50186/g57627/g59025/g61781	24	12	12
Biological process	GO:0051656	establishment of organelle localization	9/2036	92/23933	0.381987	0.942514	g12819/g13944/g15198/g25460/g36887/g41799/g51183/g58793/g9928	9	2	7
Biological process	GO:0051606	detection of stimulus	19/2036	205/23933	0.382754	0.942514	g18795/g18933/g21637/g24646/g25517/g30973/g32184/g32267/g32268/g352/g37388/g39893/g43659/g43804/g49841/g53559/g61781/g9121/g9516	19	5	14
Biological process	GO:0006596	polyamine biosynthetic process	3/2036	26/23933	0.382896	0.942514	g1206/g21558/g44868	3	1	2
Biological process	GO:0009395	phospholipid catabolic process	3/2036	26/23933	0.382896	0.942514	g17637/g17649/g64112	3	2	1
Biological process	GO:0016075	rRNA catabolic process	3/2036	26/23933	0.382896	0.942514	g21337/g43189/g49037	3	1	2
Biological process	GO:0043174	nucleoside salvage	3/2036	26/23933	0.382896	0.942514	g12899/g53927/g63869	3	1	2
Biological process	GO:0052325	cell wall pectin biosynthetic process	3/2036	26/23933	0.382896	0.942514	g50626/g50761/g54875	3	0	3
Biological process	GO:0016036	cellular response to phosphate starvation	8/2036	81/23933	0.38412	0.943605	g13115/g13947/g26140/g26297/g34420/g52884/g57692/g60258	8	2	6
Biological process	GO:0009850	auxin metabolic process	7/2036	70/23933	0.385995	0.943605	g25524/g38441/g38859/g41063/g41748/g59133/g59766	7	2	5
Biological process	GO:0009555	pollen development	32/2036	354/23933	0.386041	0.943605	g16559/g17915/g23959/g24246/g25519/g26525/g30119/g30543/g31186/g32222/g33985/g4367/g48426/g50319/g51915/g52138/g5268/g53874/g5464/g55036/g55166/g56380/g56381/g56428/g56872/g57724/g57770/g57779/g59010/g60879/g7933/g8865	32	12	20
Biological process	GO:0009127	purine nucleoside monophosphate biosynthetic process	15/2036	160/23933	0.386335	0.943605	g21456/g32874/g39707/g39788/g45357/g49533/g49978/g50952/g58124/g58139/g59328/g60033/g61/g61019/g63869	15	1	14
Biological process	GO:0009168	purine ribonucleoside monophosphate biosynthetic process	15/2036	160/23933	0.386335	0.943605	g21456/g32874/g39707/g39788/g45357/g49533/g49978/g50952/g58124/g58139/g59328/g60033/g61/g61019/g63869	15	1	14
Biological process	GO:0009856	pollination	42/2036	469/23933	0.386565	0.943605	g13415/g16196/g28250/g30946/g31398/g32638/g34455/g34457/g37858/g37909/g38659/g38718/g38789/g38802/g38809/g38896/g38898/g38907/g38933/g40271/g41824/g43062/g43124/g46386/g4983/g50413/g51915/g52138/g54108/g5446/g55559/g57569/g58999/g59002/g59003/g59004/g59257/g59314/g61086/g61092/g61094/g9711	42	25	17
Biological process	GO:0044706	multi-multicellular organism process	42/2036	469/23933	0.386565	0.943605	g13415/g16196/g28250/g30946/g31398/g32638/g34455/g34457/g37858/g37909/g38659/g38718/g38789/g38802/g38809/g38896/g38898/g38907/g38933/g40271/g41824/g43062/g43124/g46386/g4983/g50413/g51915/g52138/g54108/g5446/g55559/g57569/g58999/g59002/g59003/g59004/g59257/g59314/g61086/g61092/g61094/g9711	42	25	17
Biological process	GO:0018904	ether metabolic process	4/2036	37/23933	0.387171	0.943893	g2123/g24994/g41751/g47199	4	3	1
Biological process	GO:0016132	brassinosteroid biosynthetic process	5/2036	48/23933	0.388066	0.943893	g14407/g25519/g41764/g41882/g60684	5	0	5
Biological process	GO:0042133	neurotransmitter metabolic process	5/2036	48/23933	0.388066	0.943893	g13732/g26957/g28449/g50946/g62593	5	1	4
Biological process	GO:0048527	lateral root development	16/2036	172/23933	0.392342	0.953162	g1008/g13174/g13217/g13583/g13852/g13867/g19842/g29137/g36835/g4095/g41992/g42933/g54639/g61321/g61322/g8186	16	3	13
Biological process	GO:0002229	defense response to oomycetes	9/2036	93/23933	0.39441	0.957052	g160/g25726/g29570/g34220/g40975/g4415/g50155/g58935/g6380	9	2	7
Biological process	GO:0019318	hexose metabolic process	14/2036	150/23933	0.399273	0.958062	g17011/g20541/g29828/g32551/g32562/g39116/g39707/g39788/g45357/g50952/g54144/g54791/g58139/g60258	14	3	11
Biological process	GO:0009610	response to symbiotic fungus	2/2036	16/23933	0.400248	0.958062	g5276/g63073	2	1	1
Biological process	GO:0010389	regulation of G2/M transition of mitotic cell cycle	2/2036	16/23933	0.400248	0.958062	g26893/g61366	2	1	1
Biological process	GO:0015695	organic cation transport	2/2036	16/23933	0.400248	0.958062	g42460/g8186	2	1	1
Biological process	GO:0045815	positive regulation of gene expression, epigenetic	2/2036	16/23933	0.400248	0.958062	g2316/g38373	2	0	2
Biological process	GO:0071265	L-methionine biosynthetic process	2/2036	16/23933	0.400248	0.958062	g19369/g19396	2	0	2
Biological process	GO:1905177	tracheary element differentiation	2/2036	16/23933	0.400248	0.958062	g21558/g44868	2	0	2
Biological process	GO:0006664	glycolipid metabolic process	7/2036	71/23933	0.400302	0.958062	g16196/g26297/g3478/g42541/g58125/g59244/g60818	7	4	3
Biological process	GO:1903509	liposaccharide metabolic process	7/2036	71/23933	0.400302	0.958062	g16196/g26297/g3478/g42541/g58125/g59244/g60818	7	4	3
Biological process	GO:0009826	unidimensional cell growth	33/2036	368/23933	0.401792	0.958062	g1049/g13057/g14373/g16196/g186/g18834/g20212/g24446/g25696/g27129/g27144/g28250/g30418/g31398/g35276/g39309/g40271/g41748/g43062/g43658/g47776/g4983/g50413/g53293/g54101/g5446/g55136/g57569/g59314/g60016/g63729/g8147/g9121	33	12	21
Biological process	GO:0015749	monosaccharide transmembrane transport	6/2036	60/23933	0.403047	0.958062	g11678/g22941/g60482/g6980/g7087/g9511	6	2	4
Biological process	GO:0010252	auxin homeostasis	5/2036	49/23933	0.405423	0.958062	g15879/g30543/g36835/g54101/g8865	5	0	5
Biological process	GO:0006098	pentose-phosphate shunt	3/2036	27/23933	0.406598	0.958062	g47463/g54791/g56269	3	0	3
Biological process	GO:0007091	metaphase/anaphase transition of mitotic cell cycle	3/2036	27/23933	0.406598	0.958062	g30821/g40610/g50927	3	0	3
Biological process	GO:0009130	pyrimidine nucleoside monophosphate biosynthetic process	3/2036	27/23933	0.406598	0.958062	g12899/g53927/g58558	3	1	2
Biological process	GO:0010082	regulation of root meristem growth	3/2036	27/23933	0.406598	0.958062	g25313/g50506/g58340	3	1	2
Biological process	GO:0010965	regulation of mitotic sister chromatid separation	3/2036	27/23933	0.406598	0.958062	g30821/g40610/g50927	3	0	3
Biological process	GO:0030071	regulation of mitotic metaphase/anaphase transition	3/2036	27/23933	0.406598	0.958062	g30821/g40610/g50927	3	0	3
Biological process	GO:0044784	metaphase/anaphase transition of cell cycle	3/2036	27/23933	0.406598	0.958062	g30821/g40610/g50927	3	0	3
Biological process	GO:0051156	glucose 6-phosphate metabolic process	3/2036	27/23933	0.406598	0.958062	g47463/g54791/g56269	3	0	3
Biological process	GO:0051306	mitotic sister chromatid separation	3/2036	27/23933	0.406598	0.958062	g30821/g40610/g50927	3	0	3
Biological process	GO:1902099	regulation of metaphase/anaphase transition of cell cycle	3/2036	27/23933	0.406598	0.958062	g30821/g40610/g50927	3	0	3
Biological process	GO:1905818	regulation of chromosome separation	3/2036	27/23933	0.406598	0.958062	g30821/g40610/g50927	3	0	3
Biological process	GO:0006563	L-serine metabolic process	4/2036	38/23933	0.406989	0.958062	g16082/g35146/g53985/g57375	4	0	4
Biological process	GO:0006739	NADP metabolic process	4/2036	38/23933	0.406989	0.958062	g11388/g47463/g54791/g56269	4	0	4
Biological process	GO:0010345	suberin biosynthetic process	4/2036	38/23933	0.406989	0.958062	g50626/g50761/g54875/g7411	4	1	3
Biological process	GO:0006979	response to oxidative stress	40/2036	450/23933	0.409258	0.962297	g11639/g1386/g14222/g14749/g16957/g17073/g19571/g20355/g20424/g2123/g21463/g23246/g23950/g24994/g25021/g25528/g25912/g28561/g28564/g29047/g29615/g30167/g31281/g34466/g38441/g38746/g39643/g41626/g44130/g444/g47199/g50222/g50349/g50433/g53874/g5393/g57692/g58517/g58777/g60739	40	8	32
Biological process	GO:0050790	regulation of catalytic activity	22/2036	243/23933	0.412377	0.968519	g1104/g13057/g13511/g14125/g17111/g17369/g20806/g2123/g29911/g30422/g36835/g41861/g51955/g5386/g59605/g7411/g748/g7593/g7794/g849/g850/g9931	22	5	17
Biological process	GO:0062012	regulation of small molecule metabolic process	13/2036	140/23933	0.413127	0.969169	g14125/g17144/g17702/g24003/g29126/g3436/g34795/g38960/g41748/g42002/g52884/g58667/g60256	13	2	11
Biological process	GO:0040011	locomotion	6/2036	61/23933	0.418638	0.979161	g35501/g43124/g50413/g51915/g52138/g57569	6	4	2
Biological process	GO:0090558	plant epidermis development	28/2036	313/23933	0.418958	0.979161	g1086/g12658/g13583/g16068/g186/g20342/g20349/g21456/g25533/g26525/g30418/g33085/g34802/g38710/g39389/g47176/g50002/g50451/g56590/g56783/g58889/g60033/g60581/g61019/g62127/g63729/g8886/g9508	28	4	24
Biological process	GO:0001763	morphogenesis of a branching structure	5/2036	50/23933	0.422717	0.979161	g20482/g25386/g55174/g60968/g8186	5	1	4
Biological process	GO:0051817	modification of morphology or physiology of other organism involved in symbiotic interaction	5/2036	50/23933	0.422717	0.979161	g1059/g16711/g25261/g36877/g49909	5	3	2
Biological process	GO:1901616	organic hydroxy compound catabolic process	5/2036	50/23933	0.422717	0.979161	g14407/g34394/g41764/g55256/g60684	5	1	4
Biological process	GO:0009813	flavonoid biosynthetic process	13/2036	141/23933	0.423328	0.979161	g1369/g14749/g18043/g20374/g25510/g39383/g39384/g41992/g43457/g58655/g59699/g63758/g9807	13	2	11
Biological process	GO:0010114	response to red light	8/2036	84/23933	0.42393	0.979161	g1386/g20212/g20638/g25517/g25696/g26082/g47182/g932	8	5	3
Biological process	GO:0009156	ribonucleoside monophosphate biosynthetic process	17/2036	187/23933	0.424383	0.979161	g12899/g21456/g32874/g39707/g39788/g45357/g49533/g49978/g50952/g53927/g58124/g58139/g59328/g60033/g61/g61019/g63869	17	2	15
Biological process	GO:0009411	response to UV	17/2036	187/23933	0.424383	0.979161	g14222/g25519/g25584/g30909/g33085/g34066/g34606/g34735/g43285/g43672/g48/g53252/g56787/g58077/g59627/g60739/g986	17	8	9
Biological process	GO:0006760	folic acid-containing compound metabolic process	4/2036	39/23933	0.426677	0.979161	g24385/g44161/g48971/g54963	4	1	3
Biological process	GO:0010229	inflorescence development	4/2036	39/23933	0.426677	0.979161	g10494/g16281/g58340/g62127	4	3	1
Biological process	GO:0042752	regulation of circadian rhythm	12/2036	130/23933	0.428035	0.979161	g11537/g17207/g25517/g25584/g2767/g2896/g30973/g33906/g33907/g43672/g48715/g55796	12	8	4
Biological process	GO:0044770	cell cycle phase transition	7/2036	73/23933	0.428873	0.979161	g26893/g30821/g38710/g40610/g48089/g50927/g61366	7	2	5
Biological process	GO:0009262	deoxyribonucleotide metabolic process	3/2036	28/23933	0.430019	0.979161	g54068/g58558/g64070	3	0	3
Biological process	GO:0009956	radial pattern formation	3/2036	28/23933	0.430019	0.979161	g1041/g30038/g38362	3	2	1
Biological process	GO:0015936	coenzyme A metabolic process	3/2036	28/23933	0.430019	0.979161	g18031/g19167/g9838	3	0	3
Biological process	GO:0044839	cell cycle G2/M phase transition	3/2036	28/23933	0.430019	0.979161	g26893/g48089/g61366	3	2	1
Biological process	GO:0070301	cellular response to hydrogen peroxide	3/2036	28/23933	0.430019	0.979161	g11639/g38441/g50349	3	0	3
Biological process	GO:0000082	G1/S transition of mitotic cell cycle	2/2036	17/23933	0.430774	0.979161	g26893/g38710	2	0	2
Biological process	GO:0006646	phosphatidylethanolamine biosynthetic process	2/2036	17/23933	0.430774	0.979161	g18417/g46632	2	1	1
Biological process	GO:0010067	procambium histogenesis	2/2036	17/23933	0.430774	0.979161	g20482/g25386	2	0	2
Biological process	GO:0015850	organic hydroxy compound transport	2/2036	17/23933	0.430774	0.979161	g13729/g8613	2	0	2
Biological process	GO:0030091	protein repair	2/2036	17/23933	0.430774	0.979161	g30850/g60543	2	0	2
Biological process	GO:0046337	phosphatidylethanolamine metabolic process	2/2036	17/23933	0.430774	0.979161	g18417/g46632	2	1	1
Biological process	GO:0046834	lipid phosphorylation	2/2036	17/23933	0.430774	0.979161	g39296/g59217	2	0	2
Biological process	GO:0046854	phosphatidylinositol phosphorylation	2/2036	17/23933	0.430774	0.979161	g39296/g59217	2	0	2
Biological process	GO:0090354	regulation of auxin metabolic process	2/2036	17/23933	0.430774	0.979161	g25524/g41748	2	0	2
Biological process	GO:1905156	negative regulation of photosynthesis	2/2036	17/23933	0.430774	0.979161	g31490/g50500	2	0	2
Biological process	GO:0034440	lipid oxidation	9/2036	96/23933	0.431712	0.980208	g23818/g40236/g4952/g5220/g54221/g54581/g55229/g55653/g56601	9	2	7
Biological process	GO:0006081	cellular aldehyde metabolic process	11/2036	119/23933	0.433031	0.981025	g14125/g20318/g25427/g25553/g28449/g3761/g3785/g47463/g54791/g56269/g57510	11	3	8
Biological process	GO:0090626	plant epidermis morphogenesis	11/2036	119/23933	0.433031	0.981025	g20342/g20349/g25533/g47176/g50002/g58889/g60033/g62127/g63729/g8886/g9508	11	1	10
Biological process	GO:0046128	purine ribonucleoside metabolic process	6/2036	62/23933	0.434176	0.982533	g1206/g14135/g29366/g55182/g63869/g7921	6	2	4
Biological process	GO:0002218	activation of innate immune response	10/2036	108/23933	0.438368	0.990925	g1386/g18302/g2168/g28289/g37945/g39893/g42615/g57627/g59025/g61781	10	5	5
Biological process	GO:0055080	cation homeostasis	29/2036	328/23933	0.442213	0.998513	g1041/g12555/g16737/g24748/g25233/g26605/g27278/g3062/g30659/g31934/g34061/g34297/g39025/g39389/g43966/g47736/g54255/g54899/g54900/g55136/g57692/g59385/g60042/g60204/g60783/g62271/g63816/g7006/g7253	29	8	21
Biological process	GO:0034599	cellular response to oxidative stress	9/2036	97/23933	0.444116	1	g11639/g14749/g2123/g24994/g25912/g38441/g47199/g50349/g57692	9	2	7
Biological process	GO:0000280	nuclear division	20/2036	224/23933	0.444641	1	g15198/g1613/g16902/g17369/g17416/g19842/g24754/g248/g29753/g30685/g30821/g31858/g40610/g47780/g50319/g50927/g5268/g57703/g59010/g847	20	3	17
Biological process	GO:0080147	root hair cell development	8/2036	86/23933	0.450371	1	g12658/g26525/g30418/g34802/g50451/g56590/g56783/g63729	8	3	5
Biological process	GO:0000919	cell plate assembly	3/2036	29/23933	0.453097	1	g13325/g31666/g49798	3	0	3
Biological process	GO:0009895	negative regulation of catabolic process	3/2036	29/23933	0.453097	1	g18125/g43189/g49037	3	1	2
Biological process	GO:0016045	detection of bacterium	3/2036	29/23933	0.453097	1	g37388/g39893/g61781	3	2	1
Biological process	GO:0098543	detection of other organism	3/2036	29/23933	0.453097	1	g37388/g39893/g61781	3	2	1
Biological process	GO:2000067	regulation of root morphogenesis	3/2036	29/23933	0.453097	1	g25936/g34061/g39389	3	1	2
Biological process	GO:0010564	regulation of cell cycle process	11/2036	121/23933	0.455288	1	g17369/g26893/g30821/g34795/g40610/g48089/g50927/g53661/g59927/g61366/g63073	11	2	9
Biological process	GO:0009812	flavonoid metabolic process	16/2036	179/23933	0.456268	1	g1369/g14749/g18043/g20374/g25510/g30973/g37883/g39383/g39384/g41992/g42615/g43457/g58655/g59699/g63758/g9807	16	2	14
Biological process	GO:0009825	multidimensional cell growth	7/2036	75/23933	0.457268	1	g11960/g12107/g12645/g17486/g31168/g40874/g54803	7	0	7
Biological process	GO:0051510	regulation of unidimensional cell growth	7/2036	75/23933	0.457268	1	g13057/g18834/g31398/g43062/g50413/g57569/g60016	7	2	5
Biological process	GO:0005977	glycogen metabolic process	2/2036	18/23933	0.460449	1	g46258/g55556	2	0	2
Biological process	GO:0006085	acetyl-CoA biosynthetic process	2/2036	18/23933	0.460449	1	g49533/g49978	2	0	2
Biological process	GO:0006112	energy reserve metabolic process	2/2036	18/23933	0.460449	1	g46258/g55556	2	0	2
Biological process	GO:0006829	zinc ion transport	2/2036	18/23933	0.460449	1	g39180/g9511	2	1	1
Biological process	GO:0015748	organophosphate ester transport	2/2036	18/23933	0.460449	1	g21545/g34438	2	1	1
Biological process	GO:0019856	pyrimidine nucleobase biosynthetic process	2/2036	18/23933	0.460449	1	g57284/g63746	2	0	2
Biological process	GO:0043549	regulation of kinase activity	10/2036	110/23933	0.461753	1	g1104/g13057/g17369/g29911/g30422/g41861/g51955/g5386/g748/g9931	10	2	8
Biological process	GO:0009744	response to sucrose	8/2036	87/23933	0.46352	1	g12194/g34438/g34606/g38710/g388/g4704/g48393/g48394	8	3	5
Biological process	GO:0033674	positive regulation of kinase activity	8/2036	87/23933	0.46352	1	g1104/g13057/g17369/g29911/g41861/g51955/g748/g9931	8	2	6
Biological process	GO:0009247	glycolipid biosynthetic process	6/2036	64/23933	0.465009	1	g16196/g26297/g3478/g42541/g58125/g59244	6	3	3
Biological process	GO:0009559	embryo sac central cell differentiation	6/2036	64/23933	0.465009	1	g29406/g31378/g34010/g42209/g4640/g63231	6	0	6
Biological process	GO:0042278	purine nucleoside metabolic process	6/2036	64/23933	0.465009	1	g1206/g14135/g29366/g55182/g63869/g7921	6	2	4
Biological process	GO:0042558	pteridine-containing compound metabolic process	4/2036	41/23933	0.465493	1	g24385/g44161/g48971/g54963	4	1	3
Biological process	GO:0046131	pyrimidine ribonucleoside metabolic process	4/2036	41/23933	0.465493	1	g12899/g19898/g19973/g53927	4	1	3
Biological process	GO:0051053	negative regulation of DNA metabolic process	4/2036	41/23933	0.465493	1	g23959/g53661/g59605/g59927	4	0	4
Biological process	GO:0072522	purine-containing compound biosynthetic process	19/2036	215/23933	0.46616	1	g1206/g1394/g1395/g21456/g32874/g39707/g39788/g45357/g49533/g49978/g50952/g55182/g58124/g58139/g59328/g60033/g61/g61019/g63869	19	2	17
Biological process	GO:0009116	nucleoside metabolic process	11/2036	122/23933	0.466377	1	g1206/g12899/g14135/g19898/g19973/g29366/g53927/g55182/g63147/g63869/g7921	11	3	8
Biological process	GO:0009658	chloroplast organization	23/2036	262/23933	0.469213	1	g1212/g12819/g1863/g20638/g24844/g25460/g3310/g33994/g36887/g38042/g41799/g45799/g51183/g51459/g54710/g58793/g61447/g8476/g8656/g8662/g932/g986/g9928	23	2	21
Biological process	GO:0043900	regulation of multi-organism process	23/2036	262/23933	0.469213	1	g1059/g13640/g1386/g14749/g17111/g17164/g24750/g25720/g29570/g31398/g3590/g37696/g40975/g41861/g42772/g43062/g50155/g50413/g5433/g57569/g60581/g61780/g9506	23	7	16
Biological process	GO:0002682	regulation of immune system process	24/2036	274/23933	0.471698	1	g13640/g1386/g17111/g18302/g2168/g24003/g24750/g25720/g28289/g36877/g37945/g39893/g41861/g42615/g45992/g46002/g50120/g50123/g50130/g50180/g50186/g57627/g59025/g61781	24	12	12
Biological process	GO:0002832	negative regulation of response to biotic stimulus	5/2036	53/23933	0.473916	1	g17164/g25720/g40975/g50155/g60581	5	2	3
Biological process	GO:0006541	glutamine metabolic process	5/2036	53/23933	0.473916	1	g26957/g29752/g44735/g44770/g54963	5	0	5
Biological process	GO:0006885	regulation of pH	5/2036	53/23933	0.473916	1	g54899/g54900/g55136/g59385/g60783	5	2	3
Biological process	GO:0010197	polar nucleus fusion	5/2036	53/23933	0.473916	1	g29406/g31378/g34010/g42209/g4640	5	0	5
Biological process	GO:0032102	negative regulation of response to external stimulus	5/2036	53/23933	0.473916	1	g17164/g25720/g40975/g50155/g60581	5	2	3
Biological process	GO:0034614	cellular response to reactive oxygen species	5/2036	53/23933	0.473916	1	g11639/g25912/g38441/g50349/g57692	5	0	5
Biological process	GO:0043901	negative regulation of multi-organism process	5/2036	53/23933	0.473916	1	g17164/g25720/g40975/g50155/g60581	5	2	3
Biological process	GO:2001251	negative regulation of chromosome organization	5/2036	53/23933	0.473916	1	g2316/g30821/g34795/g40610/g47745	5	1	4
Biological process	GO:1901659	glycosyl compound biosynthetic process	13/2036	146/23933	0.47421	1	g1206/g12899/g20318/g24003/g25553/g3761/g3785/g53927/g55182/g57510/g58619/g58629/g63869	13	4	9
Biological process	GO:0006817	phosphate ion transport	3/2036	30/23933	0.475776	1	g29565/g29833/g5297	3	0	3
Biological process	GO:0006836	neurotransmitter transport	3/2036	30/23933	0.475776	1	g20254/g25645/g3657	3	0	3
Biological process	GO:0007088	regulation of mitotic nuclear division	3/2036	30/23933	0.475776	1	g30821/g40610/g50927	3	0	3
Biological process	GO:0009595	detection of biotic stimulus	3/2036	30/23933	0.475776	1	g37388/g39893/g61781	3	2	1
Biological process	GO:0010099	regulation of photomorphogenesis	3/2036	30/23933	0.475776	1	g401/g42630/g49841	3	0	3
Biological process	GO:0033047	regulation of mitotic sister chromatid segregation	3/2036	30/23933	0.475776	1	g30821/g40610/g50927	3	0	3
Biological process	GO:0043467	regulation of generation of precursor metabolites and energy	3/2036	30/23933	0.475776	1	g31490/g36554/g50500	3	0	3
Biological process	GO:0048235	pollen sperm cell differentiation	3/2036	30/23933	0.475776	1	g16559/g26525/g48426	3	3	0
Biological process	GO:0051017	actin filament bundle assembly	3/2036	30/23933	0.475776	1	g49000/g5138/g60589	3	0	3
Biological process	GO:0061572	actin filament bundle organization	3/2036	30/23933	0.475776	1	g49000/g5138/g60589	3	0	3
Biological process	GO:0098581	detection of external biotic stimulus	3/2036	30/23933	0.475776	1	g37388/g39893/g61781	3	2	1
Biological process	GO:1900618	regulation of shoot system morphogenesis	3/2036	30/23933	0.475776	1	g19234/g3436/g60968	3	1	2
Biological process	GO:1905613	regulation of developmental vegetative growth	3/2036	30/23933	0.475776	1	g24823/g3436/g58531	3	1	2
Biological process	GO:0032103	positive regulation of response to external stimulus	8/2036	88/23933	0.476604	1	g1386/g17111/g26140/g29570/g3590/g37696/g42772/g61780	8	4	4
Biological process	GO:0042327	positive regulation of phosphorylation	8/2036	88/23933	0.476604	1	g1104/g13057/g17369/g29911/g41861/g51955/g748/g9931	8	2	6
Biological process	GO:0032101	regulation of response to external stimulus	18/2036	205/23933	0.48022	1	g13583/g13640/g1386/g14749/g17111/g17164/g24750/g25720/g26140/g29570/g3590/g37696/g40975/g41861/g42772/g50155/g60581/g61780	18	6	12
Biological process	GO:0042398	cellular modified amino acid biosynthetic process	4/2036	42/23933	0.484548	1	g28449/g44161/g48971/g54963	4	1	3
Biological process	GO:0030244	cellulose biosynthetic process	7/2036	77/23933	0.485353	1	g14373/g20790/g39267/g43027/g49798/g53594/g54735	7	2	5
Biological process	GO:0046034	ATP metabolic process	14/2036	159/23933	0.487311	1	g21456/g32874/g39707/g39788/g45357/g49533/g49978/g50952/g58124/g58139/g59328/g60033/g61/g61019	14	1	13
Biological process	GO:0000086	G2/M transition of mitotic cell cycle	2/2036	19/23933	0.489197	1	g26893/g61366	2	1	1
Biological process	GO:0006241	CTP biosynthetic process	2/2036	19/23933	0.489197	1	g12899/g53927	2	1	1
Biological process	GO:0009208	pyrimidine ribonucleoside triphosphate metabolic process	2/2036	19/23933	0.489197	1	g12899/g53927	2	1	1
Biological process	GO:0009209	pyrimidine ribonucleoside triphosphate biosynthetic process	2/2036	19/23933	0.489197	1	g12899/g53927	2	1	1
Biological process	GO:0046036	CTP metabolic process	2/2036	19/23933	0.489197	1	g12899/g53927	2	1	1
Biological process	GO:1901371	regulation of leaf morphogenesis	2/2036	19/23933	0.489197	1	g19234/g3436	2	0	2
Biological process	GO:1901988	negative regulation of cell cycle phase transition	2/2036	19/23933	0.489197	1	g30821/g40610	2	0	2
Biological process	GO:1901991	negative regulation of mitotic cell cycle phase transition	2/2036	19/23933	0.489197	1	g30821/g40610	2	0	2
Biological process	GO:0010562	positive regulation of phosphorus metabolic process	8/2036	89/23933	0.489609	1	g1104/g13057/g17369/g29911/g41861/g51955/g748/g9931	8	2	6
Biological process	GO:0034285	response to disaccharide	8/2036	89/23933	0.489609	1	g12194/g34438/g34606/g38710/g388/g4704/g48393/g48394	8	3	5
Biological process	GO:0045937	positive regulation of phosphate metabolic process	8/2036	89/23933	0.489609	1	g1104/g13057/g17369/g29911/g41861/g51955/g748/g9931	8	2	6
Biological process	GO:0060918	auxin transport	15/2036	171/23933	0.490071	1	g13852/g20019/g21558/g25788/g26538/g30543/g34802/g41748/g43457/g44868/g46727/g50155/g58077/g6380/g8865	15	3	12
Biological process	GO:0000741	karyogamy	5/2036	54/23933	0.490666	1	g29406/g31378/g34010/g42209/g4640	5	0	5
Biological process	GO:0002239	response to oomycetes	9/2036	101/23933	0.493275	1	g160/g25726/g29570/g34220/g40975/g4415/g50155/g58935/g6380	9	2	7
Biological process	GO:0007062	sister chromatid cohesion	3/2036	31/23933	0.498008	1	g30685/g30821/g47780	3	0	3
Biological process	GO:0043647	inositol phosphate metabolic process	3/2036	31/23933	0.498008	1	g38366/g51915/g52138	3	2	1
[truncated: 1,065 more rows]

## Sheet: S19-S2_vs_BS-S2
Ontology	ID	Description	GeneRatio	BgRatio	pvalue	p.adjust	geneID	Count	up	down
Cellular component	GO:0000148	1,3-beta-D-glucan synthase complex	10/4805	19/25048	0.00112177	0.401753	g27084/g27085/g29039/g2976/g4306/g46291/g50234/g54367/g8996/g8999	10	2	8
Cellular component	GO:0005753	mitochondrial proton-transporting ATP synthase complex	9/4805	17/25048	0.00189506	0.401753	g10504/g19999/g31218/g34031/g37085/g39670/g53220/g55115/g60931	9	7	2
Cellular component	GO:0032993	protein-DNA complex	32/4805	110/25048	0.00781795	0.90243	g10032/g10034/g13515/g16825/g21612/g24277/g25196/g29769/g31178/g34564/g3687/g41369/g4800/g48140/g4820/g48477/g4869/g49077/g4930/g55014/g56751/g57603/g59605/g60483/g62053/g62054/g62218/g6240/g7024/g7159/g9594/g9602	32	23	9
Cellular component	GO:0045263	proton-transporting ATP synthase complex, coupling factor F(o)	6/4805	11/25048	0.00944075	0.90243	g10504/g19999/g21739/g34031/g39670/g53220	6	5	1
Cellular component	GO:0005712	chiasma	6/4805	12/25048	0.0158476	0.90243	g12542/g12549/g30613/g39938/g54308/g61680	6	3	3
Cellular component	GO:0042575	DNA polymerase complex	6/4805	12/25048	0.0158476	0.90243	g10478/g10479/g10484/g22582/g33463/g37624	6	1	5
Cellular component	GO:0000325	plant-type vacuole	61/4805	247/25048	0.0187712	0.90243	g11126/g11308/g12870/g17844/g18401/g18942/g23333/g23723/g23998/g24545/g24636/g26910/g27393/g28776/g30214/g30494/g31351/g31353/g34550/g34606/g34613/g35156/g35877/g37142/g37148/g37739/g37804/g38113/g40562/g40615/g43147/g43644/g43979/g43983/g45952/g46647/g49471/g49734/g53502/g53976/g53984/g5471/g55284/g56388/g5831/g58696/g58873/g58979/g59739/g60482/g61049/g61272/g61385/g61386/g63772/g63941/g64063/g7…	61	30	31
Cellular component	GO:0005657	replication fork	14/4805	42/25048	0.0212034	0.90243	g13515/g13718/g21612/g22582/g24277/g30475/g30476/g33463/g3687/g37624/g48098/g49077/g56751/g6240	14	3	11
Cellular component	GO:0048046	apoplast	107/4805	467/25048	0.0241659	0.90243	g10095/g10239/g10478/g10484/g1105/g11191/g11215/g11974/g12604/g12695/g14117/g14143/g15610/g15633/g162/g16634/g17027/g17239/g1740/g17643/g185/g1882/g18968/g19777/g19966/g22828/g23481/g24298/g24960/g25193/g2631/g27545/g29104/g29134/g29379/g29900/g30255/g30398/g3046/g30545/g31581/g32312/g3299/g33093/g33121/g33974/g34215/g35411/g3598/g36079/g37055/g3892/g39108/g39619/g40615/g40897/g41318/g42108/g4254…	107	67	40
Cellular component	GO:0010330	cellulose synthase complex	6/4805	13/25048	0.0247254	0.90243	g18492/g28559/g28748/g47134/g681/g682	6	0	6
Cellular component	GO:0005876	spindle microtubule	8/4805	20/25048	0.0254264	0.90243	g30396/g40610/g49456/g49458/g61177/g61178/g84/g86	8	2	6
Cellular component	GO:0005643	nuclear pore	21/4805	72/25048	0.0267175	0.90243	g14275/g16247/g17453/g23036/g23381/g23382/g25702/g25703/g29669/g30176/g33911/g3469/g3470/g35008/g35429/g50594/g57678/g62156/g62185/g62328/g76	21	3	18
Cellular component	GO:0005662	DNA replication factor A complex	5/4805	10/25048	0.0276688	0.90243	g13515/g21612/g24277/g56751/g6240	5	0	5
Cellular component	GO:0034399	nuclear periphery	13/4805	41/25048	0.038609	0.999977	g12322/g25702/g25703/g31306/g33775/g34337/g3469/g3470/g41986/g44749/g511/g524/g59911	13	3	10
Cellular component	GO:0031965	nuclear membrane	26/4805	97/25048	0.0414996	0.999977	g12322/g17671/g1859/g21613/g21614/g23036/g24498/g30176/g34337/g35008/g39521/g42843/g4718/g47874/g47876/g50568/g511/g524/g57678/g59416/g61413/g62156/g62185/g76/g7953/g7988	26	8	18
Cellular component	GO:0000786	nucleosome	21/4805	76/25048	0.0465113	0.999977	g10032/g10034/g16825/g29769/g31178/g34564/g41369/g4800/g48140/g4820/g48477/g4869/g55014/g57603/g62053/g62054/g62218/g7024/g7159/g9594/g9602	21	18	3
Cellular component	GO:0016459	myosin complex	14/4805	47/25048	0.0535818	0.999977	g10226/g10227/g15661/g15669/g15914/g21613/g21614/g25713/g3222/g3246/g37139/g42733/g57021/g8176	14	8	6
Cellular component	GO:0098800	inner mitochondrial membrane protein complex	31/4805	122/25048	0.0545232	0.999977	g10504/g10566/g12711/g17154/g18319/g19795/g19999/g29069/g29109/g31218/g32733/g33081/g34031/g37085/g3724/g38032/g38194/g3941/g39670/g40045/g40185/g47550/g48490/g50155/g51445/g53220/g5482/g55115/g58774/g60931/g62541	31	27	4
Cellular component	GO:0005839	proteasome core complex	11/4805	35/25048	0.0579065	0.999977	g18094/g3178/g48356/g54602/g54907/g55146/g58681/g58893/g61311/g6417/g6446	11	10	1
Cellular component	GO:0045259	proton-transporting ATP synthase complex	10/4805	31/25048	0.0586662	0.999977	g10504/g19999/g21739/g31218/g34031/g37085/g39670/g53220/g55115/g60931	10	8	2
Cellular component	GO:0000922	spindle pole	5/4805	12/25048	0.0621527	0.999977	g24501/g34514/g46317/g46322/g53434	5	2	3
Cellular component	GO:0005782	peroxisomal matrix	5/4805	12/25048	0.0621527	0.999977	g38327/g46455/g4715/g51365/g62504	5	4	1
Cellular component	GO:0031907	microbody lumen	5/4805	12/25048	0.0621527	0.999977	g38327/g46455/g4715/g51365/g62504	5	4	1
Cellular component	GO:0016592	mediator complex	17/4805	61/25048	0.0637427	0.999977	g14470/g22905/g27837/g32151/g3718/g44052/g44053/g44054/g46518/g56236/g56237/g64154/g64158/g64160/g758/g759/g9322	17	6	11
Cellular component	GO:0005635	nuclear envelope	44/4805	184/25048	0.0644218	0.999977	g12322/g14275/g16247/g16877/g17453/g17671/g1859/g21613/g21614/g23036/g23381/g23382/g24498/g24660/g25702/g25703/g29669/g30176/g33911/g34337/g3469/g3470/g35008/g35429/g39521/g40610/g42843/g4718/g47874/g47876/g50568/g50594/g511/g52152/g524/g57678/g59416/g61413/g62156/g62185/g62328/g76/g7953/g7988	44	14	30
Cellular component	GO:0035619	root hair tip	6/4805	16/25048	0.0688253	0.999977	g10226/g10227/g15914/g3222/g3246/g55318	6	6	0
Cellular component	GO:0043596	nuclear replication fork	7/4805	20/25048	0.0718889	0.999977	g13515/g21612/g24277/g3687/g49077/g56751/g6240	7	2	5
Cellular component	GO:0009705	plant-type vacuole membrane	35/4805	144/25048	0.0751286	0.999977	g11126/g12870/g17844/g18401/g18942/g23333/g23723/g24545/g24636/g27393/g28776/g30214/g30494/g34550/g35877/g38113/g43979/g43983/g45952/g49734/g53976/g55284/g56388/g58696/g58873/g60482/g61049/g61272/g61385/g61386/g63772/g64063/g7641/g9511/g9948	35	16	19
Cellular component	GO:0044815	DNA packaging complex	21/4805	80/25048	0.0751505	0.999977	g10032/g10034/g16825/g29769/g31178/g34564/g41369/g4800/g48140/g4820/g48477/g4869/g55014/g57603/g62053/g62054/g62218/g7024/g7159/g9594/g9602	21	18	3
Cellular component	GO:0044427	chromosomal part	95/4805	434/25048	0.0849128	0.999977	g10032/g10034/g10067/g10478/g10479/g10484/g11069/g11567/g11795/g12006/g12322/g12516/g12542/g12549/g12692/g13515/g13718/g16825/g17497/g1847/g1873/g1926/g20194/g21612/g22582/g2336/g24277/g24501/g24973/g25196/g27186/g27789/g29594/g29769/g30049/g30396/g30475/g30476/g30613/g31178/g31819/g33463/g34059/g34335/g34514/g34564/g3687/g37624/g39188/g39938/g40075/g40610/g41369/g41419/g41862/g42267/g42619/g4565…	95	45	50
Cellular component	GO:0009574	preprophase band	5/4805	13/25048	0.0855448	0.999977	g1613/g34514/g37118/g46317/g60702	5	2	3
Cellular component	GO:0016442	RISC complex	5/4805	13/25048	0.0855448	0.999977	g14034/g23892/g33908/g52152/g54027	5	4	1
Cellular component	GO:0031332	RNAi effector complex	5/4805	13/25048	0.0855448	0.999977	g14034/g23892/g33908/g52152/g54027	5	4	1
Cellular component	GO:0035618	root hair	6/4805	17/25048	0.0897253	0.999977	g10226/g10227/g15914/g3222/g3246/g55318	6	6	0
Cellular component	GO:0000794	condensed nuclear chromosome	19/4805	73/25048	0.0935477	0.999977	g11795/g12542/g12549/g1847/g2336/g30396/g30613/g31819/g35953/g39188/g39938/g41419/g45654/g54308/g60761/g60898/g61680/g7611/g8873	19	8	11
Cellular component	GO:0098797	plasma membrane protein complex	16/4805	60/25048	0.0983291	0.999977	g13179/g14037/g24423/g27084/g27085/g29039/g2976/g3846/g4306/g45863/g46291/g50234/g54367/g54431/g8996/g8999	16	7	9
Cellular component	GO:0044454	nuclear chromosome part	50/4805	220/25048	0.106327	0.999977	g10067/g10478/g10479/g10484/g11069/g11795/g12006/g12516/g12542/g12549/g12692/g13515/g17497/g1847/g1873/g1926/g21612/g2336/g24277/g24973/g25196/g27186/g27789/g30396/g30613/g31819/g34059/g3687/g39188/g39938/g40075/g41419/g42267/g45654/g4800/g4869/g49077/g4930/g54308/g55644/g56751/g58159/g59605/g60761/g61680/g6240/g64021/g7611/g9594/g9602	50	24	26
Cellular component	GO:0005811	lipid droplet	8/4805	26/25048	0.108849	0.999977	g23869/g25394/g29579/g50230/g50231/g58562/g7045/g8254	8	7	1
Cellular component	GO:0005663	DNA replication factor C complex	5/4805	14/25048	0.112855	0.999977	g22582/g30475/g30476/g33463/g37624	5	1	4
Cellular component	GO:0019773	proteasome core complex, alpha-subunit complex	6/4805	18/25048	0.113657	0.999977	g18094/g3178/g54602/g55146/g58681/g58893	6	6	0
Cellular component	GO:0030894	replisome	6/4805	18/25048	0.113657	0.999977	g13515/g21612/g24277/g49077/g56751/g6240	6	1	5
Cellular component	GO:0043601	nuclear replisome	6/4805	18/25048	0.113657	0.999977	g13515/g21612/g24277/g49077/g56751/g6240	6	1	5
Cellular component	GO:0000776	kinetochore	8/4805	27/25048	0.129929	0.999977	g11795/g24501/g31819/g34514/g40610/g41419/g46317/g46322	8	3	5
Cellular component	GO:0005746	mitochondrial respiratory chain	20/4805	81/25048	0.132521	0.999977	g10566/g12711/g17154/g18319/g29069/g29109/g30169/g32733/g33081/g3724/g38032/g38194/g3941/g40045/g40185/g48490/g51445/g5482/g58774/g62541	20	19	1
Cellular component	GO:0009898	cytoplasmic side of plasma membrane	10/4805	36/25048	0.136965	0.999977	g13179/g1442/g26514/g28559/g28748/g42785/g4794/g4847/g681/g682	10	3	7
Cellular component	GO:0000228	nuclear chromosome	54/4805	244/25048	0.13764	0.999977	g10067/g10478/g10479/g10484/g11069/g11795/g12006/g12516/g12542/g12549/g12692/g13515/g17497/g1847/g1873/g1926/g21612/g2336/g24277/g24973/g25196/g27186/g27789/g30396/g30613/g31819/g34059/g35953/g3687/g39188/g39938/g40075/g41419/g42267/g45654/g4800/g4869/g49077/g4930/g54308/g55644/g56751/g58159/g59605/g60761/g60898/g61247/g61680/g6240/g64021/g7611/g8873/g9594/g9602	54	27	27
Cellular component	GO:0030125	clathrin vesicle coat	5/4805	15/25048	0.143758	0.999977	g14037/g24423/g3846/g45863/g54431	5	4	1
Cellular component	GO:0030130	clathrin coat of trans-Golgi network vesicle	5/4805	15/25048	0.143758	0.999977	g14037/g24423/g3846/g45863/g54431	5	4	1
Cellular component	GO:0030132	clathrin coat of coated pit	5/4805	15/25048	0.143758	0.999977	g14037/g24423/g3846/g45863/g54431	5	4	1
Cellular component	GO:0034702	ion channel complex	5/4805	15/25048	0.143758	0.999977	g17844/g26293/g30214/g64063/g6986	5	1	4
Cellular component	GO:0034707	chloride channel complex	5/4805	15/25048	0.143758	0.999977	g17844/g26293/g30214/g64063/g6986	5	1	4
Cellular component	GO:0000502	proteasome complex	24/4805	101/25048	0.148372	0.999977	g11819/g13414/g18094/g1977/g28623/g30800/g30802/g30804/g3178/g33438/g36834/g44074/g44118/g48356/g54602/g54907/g55146/g58681/g58893/g60937/g61311/g6417/g6446/g9738	24	17	7
Cellular component	GO:1905369	endopeptidase complex	24/4805	101/25048	0.148372	0.999977	g11819/g13414/g18094/g1977/g28623/g30800/g30802/g30804/g3178/g33438/g36834/g44074/g44118/g48356/g54602/g54907/g55146/g58681/g58893/g60937/g61311/g6417/g6446/g9738	24	17	7
Cellular component	GO:0005788	endoplasmic reticulum lumen	17/4805	70/25048	0.173934	0.999977	g1059/g12571/g20815/g33371/g34341/g35666/g36402/g40949/g41063/g47173/g55159/g55250/g61601/g61777/g61799/g61989/g62600	17	12	5
Cellular component	GO:1902495	transmembrane transporter complex	5/4805	16/25048	0.177819	0.999977	g17844/g26293/g30214/g64063/g6986	5	1	4
Cellular component	GO:0030863	cortical cytoskeleton	10/4805	38/25048	0.178754	0.999977	g1613/g28559/g28748/g31639/g34514/g37118/g46317/g53434/g681/g682	10	4	6
Cellular component	GO:0098798	mitochondrial protein complex	33/4805	147/25048	0.181982	0.999977	g10504/g10566/g12711/g17154/g18319/g19795/g19999/g29069/g29109/g31218/g32733/g33081/g34031/g34090/g37085/g3724/g38032/g38194/g3941/g39670/g40045/g40185/g47550/g48490/g49678/g50155/g51445/g53220/g5482/g55115/g58774/g60931/g62541	33	29	4
Cellular component	GO:0070652	HAUS complex	4/4805	12/25048	0.184137	0.999977	g61177/g61178/g84/g86	4	0	4
Cellular component	GO:0031597	cytosolic proteasome complex	7/4805	25/25048	0.189187	0.999977	g1977/g30800/g30802/g30804/g33438/g36834/g9738	7	6	1
Cellular component	GO:0030981	cortical microtubule cytoskeleton	9/4805	34/25048	0.190856	0.999977	g1613/g28559/g28748/g34514/g37118/g46317/g53434/g681/g682	9	3	6
Cellular component	GO:0000793	condensed chromosome	23/4805	100/25048	0.197143	0.999977	g11567/g11795/g12542/g12549/g1847/g2336/g30396/g30613/g31819/g35953/g39188/g39938/g40610/g41419/g45654/g49505/g49509/g54308/g60761/g60898/g61680/g7611/g8873	23	9	14
Cellular component	GO:0032300	mismatch repair complex	6/4805	21/25048	0.20148	0.999977	g12542/g12549/g34521/g4678/g5464/g61680	6	0	6
Cellular component	GO:0033177	proton-transporting two-sector ATPase complex, proton-transporting domain	8/4805	30/25048	0.204133	0.999977	g10504/g19999/g21739/g34031/g356/g38869/g39670/g53220	8	6	2
Cellular component	GO:0070069	cytochrome complex	5/4805	17/25048	0.214525	0.999977	g10566/g17154/g29109/g3724/g3941	5	4	1
Cellular component	GO:0098803	respiratory chain complex	19/4805	82/25048	0.21488	0.999977	g10566/g12711/g17154/g18319/g29069/g29109/g32733/g33081/g3724/g38032/g38194/g3941/g40045/g40185/g48490/g51445/g5482/g58774/g62541	19	18	1
Cellular component	GO:0005747	mitochondrial respiratory chain complex I	13/4805	54/25048	0.224555	0.999977	g12711/g18319/g29069/g32733/g33081/g38032/g38194/g40185/g48490/g51445/g5482/g58774/g62541	13	13	0
Cellular component	GO:0030964	NADH dehydrogenase complex	13/4805	54/25048	0.224555	0.999977	g12711/g18319/g29069/g32733/g33081/g38032/g38194/g40185/g48490/g51445/g5482/g58774/g62541	13	13	0
Cellular component	GO:0045271	respiratory chain complex I	13/4805	54/25048	0.224555	0.999977	g12711/g18319/g29069/g32733/g33081/g38032/g38194/g40185/g48490/g51445/g5482/g58774/g62541	13	13	0
Cellular component	GO:0019005	SCF ubiquitin ligase complex	18/4805	78/25048	0.228293	0.999977	g1046/g12192/g14548/g20596/g23953/g24066/g25095/g25465/g25777/g30222/g31422/g36960/g4020/g42049/g42298/g47773/g51430/g63993	18	8	10
Cellular component	GO:0000775	chromosome, centromeric region	15/4805	64/25048	0.234895	0.999977	g11795/g24501/g30049/g30396/g31819/g34059/g34335/g34514/g40610/g41419/g46317/g46322/g55671/g60761/g8228	15	7	8
Cellular component	GO:0044455	mitochondrial membrane part	33/4805	152/25048	0.241534	0.999977	g10504/g10566/g12711/g17154/g18319/g19795/g19999/g29069/g29109/g30169/g31218/g32733/g33081/g34031/g34090/g37085/g3724/g38032/g38194/g3941/g39670/g40045/g40185/g47550/g48490/g50155/g51445/g53220/g5482/g55115/g58774/g60931/g62541	33	29	4
Cellular component	GO:1902554	serine/threonine protein kinase complex	8/4805	32/25048	0.261048	0.999977	g11163/g11210/g11213/g20717/g23690/g26893/g47773/g7077	8	2	6
Cellular component	GO:1902911	protein kinase complex	8/4805	32/25048	0.261048	0.999977	g11163/g11210/g11213/g20717/g23690/g26893/g47773/g7077	8	2	6
Cellular component	GO:0031977	thylakoid lumen	17/4805	75/25048	0.261501	0.999977	g13303/g13774/g15620/g17425/g27063/g30627/g31630/g4178/g47081/g53218/g53219/g54134/g58036/g58494/g62967/g63845/g8948	17	13	4
Cellular component	GO:0005819	spindle	24/4805	110/25048	0.274844	0.999977	g15733/g1618/g16901/g17369/g192/g24501/g26394/g30396/g34514/g35953/g40610/g46317/g46322/g49456/g49458/g5232/g53434/g54995/g60702/g61177/g61178/g61899/g84/g86	24	10	14
Cellular component	GO:1905368	peptidase complex	24/4805	110/25048	0.274844	0.999977	g11819/g13414/g18094/g1977/g28623/g30800/g30802/g30804/g3178/g33438/g36834/g44074/g44118/g48356/g54602/g54907/g55146/g58681/g58893/g60937/g61311/g6417/g6446/g9738	24	17	7
Cellular component	GO:0070469	respiratory chain	25/4805	115/25048	0.275952	0.999977	g10566/g12711/g14330/g17154/g18319/g29069/g29109/g30169/g32733/g33081/g33272/g3724/g38032/g38194/g3941/g40045/g40185/g48490/g51362/g51445/g5482/g58774/g61743/g62541/g9877	25	23	2
Cellular component	GO:0015629	actin cytoskeleton	19/4805	86/25048	0.284803	0.999977	g10226/g10227/g15661/g15669/g15914/g21613/g21614/g25713/g31639/g3222/g3246/g37139/g42733/g48567/g49000/g57021/g59058/g8176/g9293	19	12	7
Cellular component	GO:0005881	cytoplasmic microtubule	8/4805	33/25048	0.291122	0.999977	g1613/g19074/g28559/g28748/g37118/g53434/g681/g682	8	3	5
Cellular component	GO:0030686	90S preribosome	5/4805	19/25048	0.293634	0.999977	g18420/g40954/g47482/g5553/g55793	5	4	1
Cellular component	GO:1990351	transporter complex	5/4805	19/25048	0.293634	0.999977	g17844/g26293/g30214/g64063/g6986	5	1	4
Cellular component	GO:0005675	transcription factor TFIIH holo complex	3/4805	10/25048	0.297659	0.999977	g11163/g11210/g11213	3	0	3
Cellular component	GO:0031209	SCAR complex	3/4805	10/25048	0.297659	0.999977	g29133/g36754/g37705	3	1	2
Cellular component	GO:0032806	carboxy-terminal domain protein kinase complex	3/4805	10/25048	0.297659	0.999977	g11163/g11210/g11213	3	0	3
Cellular component	GO:0044611	nuclear pore inner ring	3/4805	10/25048	0.297659	0.999977	g14275/g16247/g33911	3	1	2
Cellular component	GO:0044445	cytosolic part	63/4805	308/25048	0.305634	0.999977	g10893/g11191/g11215/g11901/g11925/g1257/g16488/g16684/g1977/g19855/g20336/g2034/g20590/g21559/g22143/g23242/g25545/g2618/g26463/g26588/g27796/g29134/g30083/g30494/g30532/g30800/g30802/g30804/g31294/g31619/g3295/g3334/g33438/g3594/g3651/g36834/g40369/g40458/g41068/g44728/g45407/g46567/g47257/g48118/g48994/g49614/g50779/g53220/g53832/g54602/g55247/g55302/g56929/g60033/g61272/g62437/g62611/g62711/g…	63	51	12
Cellular component	GO:1990391	DNA repair complex	6/4805	24/25048	0.306478	0.999977	g12542/g12549/g34521/g4678/g5464/g61680	6	0	6
Cellular component	GO:0000795	synaptonemal complex	7/4805	29/25048	0.315446	0.999977	g12542/g12549/g2336/g39188/g45654/g61680/g7611	7	1	6
Cellular component	GO:0099086	synaptonemal structure	7/4805	29/25048	0.315446	0.999977	g12542/g12549/g2336/g39188/g45654/g61680/g7611	7	1	6
Cellular component	GO:0009543	chloroplast thylakoid lumen	14/4805	63/25048	0.316019	0.999977	g13303/g13774/g15620/g17425/g27063/g30627/g31630/g53218/g53219/g54134/g58036/g58494/g63845/g8948	14	11	3
Cellular component	GO:0031978	plastid thylakoid lumen	14/4805	63/25048	0.316019	0.999977	g13303/g13774/g15620/g17425/g27063/g30627/g31630/g53218/g53219/g54134/g58036/g58494/g63845/g8948	14	11	3
Cellular component	GO:0010287	plastoglobule	16/4805	73/25048	0.31937	0.999977	g18381/g27844/g29379/g29909/g35205/g38094/g39043/g42642/g43435/g4525/g48926/g51474/g60077/g60086/g60100/g60141	16	10	6
Cellular component	GO:0000780	condensed nuclear chromosome, centromeric region	4/4805	15/25048	0.321354	0.999977	g11795/g30396/g31819/g41419	4	2	2
Cellular component	GO:0005682	U5 snRNP	4/4805	15/25048	0.321354	0.999977	g25736/g34873/g35220/g5219	4	2	2
Cellular component	GO:0030687	preribosome, large subunit precursor	4/4805	15/25048	0.321354	0.999977	g18420/g40954/g53651/g55793	4	4	0
Cellular component	GO:0031248	protein acetyltransferase complex	8/4805	34/25048	0.321973	0.999977	g19015/g26159/g31525/g35791/g45495/g49429/g7580/g9778	8	5	3
Cellular component	GO:1902493	acetyltransferase complex	8/4805	34/25048	0.321973	0.999977	g19015/g26159/g31525/g35791/g45495/g49429/g7580/g9778	8	5	3
Cellular component	GO:0022626	cytosolic ribosome	51/4805	249/25048	0.324485	0.999977	g10893/g11191/g11215/g11901/g11925/g1257/g16488/g16684/g19855/g20336/g2034/g20590/g21559/g22143/g23242/g25545/g26463/g26588/g27796/g29134/g30083/g30494/g30532/g31294/g31619/g3295/g3334/g3594/g3651/g40369/g40458/g41068/g46567/g47257/g48118/g48994/g49614/g50779/g53220/g53832/g54602/g55247/g55302/g56929/g61272/g62611/g62711/g63063/g7699/g7707/g9715	51	40	11
Cellular component	GO:0022625	cytosolic large ribosomal subunit	26/4805	124/25048	0.3405	0.999977	g10893/g11901/g11925/g1257/g16488/g16684/g20336/g23242/g25545/g26463/g30083/g30532/g31619/g3594/g46567/g48118/g48994/g53832/g55247/g55302/g62611/g62711/g63063/g7699/g7707/g9715	26	22	4
Cellular component	GO:0009986	cell surface	6/4805	25/25048	0.343518	0.999977	g1249/g16907/g46256/g4794/g4847/g59507	6	3	3
Cellular component	GO:0009524	phragmoplast	36/4805	175/25048	0.348867	0.999977	g13875/g15335/g15733/g1613/g1618/g17369/g192/g20028/g21236/g24423/g25071/g26394/g34514/g35953/g37118/g37846/g3846/g41277/g41951/g46317/g46498/g49456/g49458/g5232/g53434/g54995/g55539/g59808/g60444/g60702/g60894/g61177/g61178/g84/g86/g8717	36	18	18
Cellular component	GO:0044463	cell projection part	7/4805	30/25048	0.349323	0.999977	g10226/g10227/g15914/g3222/g3246/g54335/g55318	7	7	0
Cellular component	GO:0055028	cortical microtubule	7/4805	30/25048	0.349323	0.999977	g1613/g28559/g28748/g37118/g53434/g681/g682	7	2	5
Cellular component	GO:0120038	plasma membrane bounded cell projection part	7/4805	30/25048	0.349323	0.999977	g10226/g10227/g15914/g3222/g3246/g54335/g55318	7	7	0
Cellular component	GO:0000785	chromatin	48/4805	236/25048	0.350356	0.999977	g10032/g10034/g10067/g11069/g12006/g12322/g12542/g12549/g12692/g16825/g17497/g1873/g1926/g20194/g24973/g27186/g27789/g29594/g29769/g31178/g34059/g34564/g40075/g41369/g42267/g42619/g4800/g48140/g4820/g48477/g4869/g55014/g55644/g57603/g58159/g58662/g58992/g60356/g61509/g61680/g62053/g62054/g62218/g64021/g7024/g7159/g9594/g9602	48	28	20
Cellular component	GO:0005750	mitochondrial respiratory chain complex III	3/4805	11/25048	0.355478	0.999977	g10566/g3724/g3941	3	2	1
Cellular component	GO:0033597	mitotic checkpoint complex	3/4805	11/25048	0.355478	0.999977	g3963/g53737/g57788	3	0	3
Cellular component	GO:0045275	respiratory chain complex III	3/4805	11/25048	0.355478	0.999977	g10566/g3724/g3941	3	2	1
Cellular component	GO:0016363	nuclear matrix	4/4805	16/25048	0.369199	0.999977	g31306/g33775/g41986/g59911	4	3	1
Cellular component	GO:0019774	proteasome core complex, beta-subunit complex	4/4805	16/25048	0.369199	0.999977	g48356/g54907/g6417/g6446	4	4	0
Cellular component	GO:1990204	oxidoreductase complex	24/4805	116/25048	0.375757	0.999977	g10566/g12711/g18319/g24814/g29069/g32733/g33081/g3724/g38032/g38194/g3935/g3941/g40045/g40185/g44728/g48490/g51445/g53218/g53219/g54036/g5482/g58774/g62541/g8948	24	22	2
Cellular component	GO:0000932	P-body	23/4805	111/25048	0.376815	0.999977	g14259/g15255/g15258/g16745/g27326/g27600/g35782/g36155/g42137/g45/g52152/g54844/g54845/g55031/g55037/g55151/g60745/g61308/g61309/g63167/g64184/g6465/g9591	23	5	18
Cellular component	GO:0010282	senescence-associated vacuole	7/4805	31/25048	0.383549	0.999977	g34606/g34613/g37739/g37804/g53502/g53984/g5831	7	6	1
Cellular component	GO:0031225	anchored component of membrane	52/4805	261/25048	0.404662	0.999977	g1102/g11613/g1246/g1249/g15610/g1584/g162/g16296/g17395/g17396/g17397/g1740/g19074/g19417/g19853/g21022/g25932/g26012/g26131/g26247/g26622/g27547/g30398/g30608/g30977/g31454/g34077/g35135/g37266/g37939/g39289/g39376/g39945/g4104/g41186/g41441/g4528/g45827/g46516/g46835/g53278/g54071/g54441/g54898/g57005/g58263/g59305/g59343/g59457/g61128/g62089/g9816	52	39	13
Cellular component	GO:0030176	integral component of endoplasmic reticulum membrane	15/4805	72/25048	0.406924	0.999977	g19014/g21267/g22704/g30497/g4813/g48276/g54436/g55024/g56619/g56629/g58978/g59452/g59664/g59666/g7411	15	6	9
Cellular component	GO:0031227	intrinsic component of endoplasmic reticulum membrane	15/4805	72/25048	0.406924	0.999977	g19014/g21267/g22704/g30497/g4813/g48276/g54436/g55024/g56619/g56629/g58978/g59452/g59664/g59666/g7411	15	6	9
Cellular component	GO:0000778	condensed nuclear chromosome kinetochore	3/4805	12/25048	0.412592	0.999977	g11795/g31819/g41419	3	1	2
Cellular component	GO:0030875	rDNA protrusion	3/4805	12/25048	0.412592	0.999977	g1873/g1926/g42267	3	1	2
Cellular component	GO:0000790	nuclear chromatin	23/4805	113/25048	0.412773	0.999977	g10067/g11069/g12006/g12542/g12549/g12692/g17497/g1873/g1926/g24973/g27186/g27789/g34059/g40075/g42267/g4800/g4869/g55644/g58159/g61680/g64021/g9594/g9602	23	12	11
Cellular component	GO:0030173	integral component of Golgi membrane	4/4805	17/25048	0.416791	0.999977	g30497/g48276/g56619/g56629	4	2	2
Cellular component	GO:0031228	intrinsic component of Golgi membrane	4/4805	17/25048	0.416791	0.999977	g30497/g48276/g56619/g56629	4	2	2
Cellular component	GO:0000123	histone acetyltransferase complex	6/4805	27/25048	0.418381	0.999977	g19015/g26159/g31525/g49429/g7580/g9778	6	3	3
Cellular component	GO:0000792	heterochromatin	6/4805	27/25048	0.418381	0.999977	g11069/g12006/g17497/g27789/g34059/g58992	6	4	2
Cellular component	GO:0005776	autophagosome	6/4805	27/25048	0.418381	0.999977	g17964/g20717/g46490/g50563/g61626/g8490	6	2	4
Cellular component	GO:0019897	extrinsic component of plasma membrane	18/4805	88/25048	0.422828	0.999977	g13179/g304/g43525/g43643/g55693/g55696/g55699/g55814/g55831/g55852/g55863/g55902/g60023/g60721/g61697/g7304/g8964/g9781	18	9	9
Cellular component	GO:0046658	anchored component of plasma membrane	40/4805	201/25048	0.425829	0.999977	g1102/g1246/g1249/g15610/g1584/g162/g16296/g17395/g17396/g17397/g1740/g19074/g19417/g26131/g26247/g26622/g30398/g30977/g31454/g34077/g37266/g37939/g39289/g39945/g4104/g41186/g41441/g4528/g45827/g46516/g46835/g53278/g54071/g54898/g58263/g59305/g59343/g59457/g61128/g62089	40	29	11
Cellular component	GO:0061695	transferase complex, transferring phosphorus-containing groups	32/4805	160/25048	0.427645	0.999977	g10478/g10479/g10484/g11163/g11210/g11213/g11634/g13647/g16946/g16947/g19461/g20717/g22582/g23690/g26893/g26990/g27789/g33463/g34059/g37624/g42642/g46702/g47773/g49077/g54348/g54946/g60244/g61494/g61760/g61957/g7077/g8834	32	11	21
Cellular component	GO:0009706	chloroplast inner membrane	21/4805	104/25048	0.435629	0.999977	g11522/g13183/g17332/g17685/g20784/g26807/g32979/g33672/g34037/g34262/g35054/g35057/g40609/g41619/g4376/g45960/g50905/g5162/g55949/g63287/g7686	21	9	12
Cellular component	GO:0035770	ribonucleoprotein granule	25/4805	125/25048	0.443744	0.999977	g14259/g15255/g15258/g16745/g25736/g27326/g27600/g35782/g36155/g38663/g42137/g45/g52152/g54844/g54845/g55031/g55037/g55151/g60745/g61308/g61309/g63167/g64184/g6465/g9591	25	7	18
Cellular component	GO:0036464	cytoplasmic ribonucleoprotein granule	25/4805	125/25048	0.443744	0.999977	g14259/g15255/g15258/g16745/g25736/g27326/g27600/g35782/g36155/g38663/g42137/g45/g52152/g54844/g54845/g55031/g55037/g55151/g60745/g61308/g61309/g63167/g64184/g6465/g9591	25	7	18
Cellular component	GO:0099080	supramolecular complex	69/4805	353/25048	0.452212	0.999977	g10889/g11719/g11750/g11753/g11754/g1258/g15335/g15733/g1613/g1618/g17327/g17340/g17369/g19074/g192/g21236/g21625/g24103/g24501/g24840/g26767/g28559/g28748/g30396/g31639/g31732/g3216/g34514/g36111/g37118/g37776/g38689/g404/g40610/g42609/g43988/g46317/g46322/g46490/g46498/g49000/g49456/g49458/g50507/g51402/g5232/g53434/g54995/g55215/g55539/g57430/g59058/g59776/g60528/g60894/g61177/g61178/g61579/g6…	69	39	30
Cellular component	GO:0005874	microtubule	65/4805	333/25048	0.459865	0.999977	g10889/g11719/g11750/g11753/g11754/g1258/g15335/g15733/g1613/g1618/g17327/g17340/g17369/g19074/g192/g21236/g21625/g24103/g24501/g24840/g26767/g28559/g28748/g30396/g31732/g34514/g36111/g37118/g37776/g38689/g404/g40610/g42609/g43988/g46317/g46322/g46490/g46498/g49456/g49458/g50507/g51402/g5232/g53434/g54995/g55215/g55539/g57430/g59776/g60528/g60894/g61177/g61178/g61579/g62064/g62213/g63729/g681/g68…	65	35	30
Cellular component	GO:0031966	mitochondrial membrane	75/4805	385/25048	0.461364	0.999977	g10504/g10566/g12711/g14330/g17154/g17332/g17438/g17685/g18319/g19167/g19795/g19999/g21200/g24381/g24639/g25730/g25951/g26747/g27270/g27271/g27844/g29069/g29109/g30169/g31218/g32733/g33081/g33792/g34031/g3405/g34066/g34090/g37085/g3724/g38032/g38194/g3941/g39670/g40045/g40185/g41619/g4525/g47550/g48490/g49337/g50090/g50155/g50614/g51265/g51362/g51445/g53220/g53311/g54281/g5482/g55115/g55305/g5539…	75	56	19
Cellular component	GO:0000347	THO complex	4/4805	18/25048	0.463497	0.999977	g13674/g45169/g50278/g50279	4	0	4
Cellular component	GO:0099081	supramolecular polymer	68/4805	349/25048	0.464545	0.999977	g10889/g11719/g11750/g11753/g11754/g1258/g15335/g15733/g1613/g1618/g17327/g17340/g17369/g19074/g192/g21236/g21625/g24103/g24501/g24840/g26767/g28559/g28748/g30396/g31639/g31732/g34514/g36111/g37118/g37776/g38689/g404/g40610/g42609/g43988/g46317/g46322/g46490/g46498/g49000/g49456/g49458/g50507/g51402/g5232/g53434/g54995/g55215/g55539/g57430/g59058/g59776/g60528/g60894/g61177/g61178/g61579/g62064/g…	68	38	30
Cellular component	GO:0099512	supramolecular fiber	68/4805	349/25048	0.464545	0.999977	g10889/g11719/g11750/g11753/g11754/g1258/g15335/g15733/g1613/g1618/g17327/g17340/g17369/g19074/g192/g21236/g21625/g24103/g24501/g24840/g26767/g28559/g28748/g30396/g31639/g31732/g34514/g36111/g37118/g37776/g38689/g404/g40610/g42609/g43988/g46317/g46322/g46490/g46498/g49000/g49456/g49458/g50507/g51402/g5232/g53434/g54995/g55215/g55539/g57430/g59058/g59776/g60528/g60894/g61177/g61178/g61579/g62064/g…	68	38	30
Cellular component	GO:0099513	polymeric cytoskeletal fiber	68/4805	349/25048	0.464545	0.999977	g10889/g11719/g11750/g11753/g11754/g1258/g15335/g15733/g1613/g1618/g17327/g17340/g17369/g19074/g192/g21236/g21625/g24103/g24501/g24840/g26767/g28559/g28748/g30396/g31639/g31732/g34514/g36111/g37118/g37776/g38689/g404/g40610/g42609/g43988/g46317/g46322/g46490/g46498/g49000/g49456/g49458/g50507/g51402/g5232/g53434/g54995/g55215/g55539/g57430/g59058/g59776/g60528/g60894/g61177/g61178/g61579/g62064/g…	68	38	30
Cellular component	GO:0035267	NuA4 histone acetyltransferase complex	3/4805	13/25048	0.467983	0.999977	g19015/g49429/g9778	3	1	2
Cellular component	GO:0098562	cytoplasmic side of membrane	10/4805	49/25048	0.470526	0.999977	g13179/g1442/g26514/g28559/g28748/g42785/g4794/g4847/g681/g682	10	3	7
Cellular component	GO:0009528	plastid inner membrane	21/4805	106/25048	0.47359	0.999977	g11522/g13183/g17332/g17685/g20784/g26807/g32979/g33672/g34037/g34262/g35054/g35057/g40609/g41619/g4376/g45960/g50905/g5162/g55949/g63287/g7686	21	9	12
Cellular component	GO:0009505	plant-type cell wall	67/4805	345/25048	0.477061	0.999977	g10239/g1249/g14117/g15610/g16296/g16634/g1740/g18775/g1882/g20239/g24639/g24930/g24953/g25226/g25253/g25936/g26131/g26183/g26247/g2631/g26378/g30398/g3046/g33121/g33152/g34061/g3493/g37266/g38841/g38854/g38855/g39022/g39109/g39945/g40369/g40562/g4104/g41219/g41687/g43856/g44236/g44249/g44251/g45827/g45920/g45937/g46695/g4923/g52524/g55174/g55175/g55177/g55178/g55284/g5730/g57848/g58637/g59745/g5…	67	44	23
Cellular component	GO:0098552	side of membrane	13/4805	65/25048	0.483119	0.999977	g1249/g13179/g1442/g16907/g26514/g28559/g28748/g42785/g4794/g4847/g59507/g681/g682	13	5	8
Cellular component	GO:0044430	cytoskeletal part	93/4805	481/25048	0.484715	0.999977	g10226/g10227/g10889/g11719/g11750/g11753/g11754/g1258/g13057/g13272/g15335/g15661/g15669/g15733/g15914/g1613/g1618/g16901/g17327/g17340/g17369/g19074/g192/g21236/g21613/g21614/g21625/g24103/g24501/g24840/g25713/g26394/g26767/g28559/g28748/g30396/g31375/g31639/g31732/g3222/g3246/g34514/g35953/g36111/g37118/g37139/g37776/g38689/g404/g40610/g41244/g42609/g42733/g43988/g46317/g46322/g46490/g46498/g4…	93	53	40
Cellular component	GO:0031226	intrinsic component of plasma membrane	91/4805	471/25048	0.488397	0.999977	g1102/g11684/g12398/g1246/g1249/g1277/g13185/g13186/g13601/g15610/g1584/g162/g16296/g17395/g17396/g17397/g1740/g17647/g18110/g18492/g18540/g1871/g19074/g1924/g19417/g21204/g21267/g22728/g24632/g26131/g26247/g26622/g29746/g30398/g30977/g31112/g31454/g31656/g33254/g34077/g35039/g37266/g37939/g39289/g39945/g4104/g41186/g41318/g41441/g42054/g43979/g43983/g4528/g45827/g45888/g45952/g4647/g46516/g46835…	91	56	35
Cellular component	GO:0044452	nucleolar part	16/4805	81/25048	0.492707	0.999977	g18420/g1873/g1926/g20903/g27789/g38988/g40954/g42267/g45469/g4918/g4919/g54348/g54946/g5553/g55793/g60861	16	11	5
Cellular component	GO:0005905	clathrin-coated pit	11/4805	55/25048	0.492752	0.999977	g14037/g24423/g25940/g34293/g3846/g41720/g45863/g50280/g50281/g54431/g56413	11	9	2
Cellular component	GO:0000418	RNA polymerase IV complex	5/4805	24/25048	0.499577	0.999977	g27789/g54348/g54946/g61760/g61957	5	3	2
Cellular component	GO:0000779	condensed chromosome, centromeric region	5/4805	24/25048	0.499577	0.999977	g11795/g30396/g31819/g40610/g41419	5	3	2
Cellular component	GO:0005720	nuclear heterochromatin	5/4805	24/25048	0.499577	0.999977	g11069/g12006/g17497/g27789/g34059	5	3	2
Cellular component	GO:0010494	cytoplasmic stress granule	9/4805	45/25048	0.504263	0.999977	g16745/g27326/g38663/g42137/g52152/g55037/g55151/g63167/g6465	9	5	4
Cellular component	GO:0015934	large ribosomal subunit	27/4805	139/25048	0.50538	0.999977	g10893/g11901/g11925/g1257/g16488/g16684/g20336/g23242/g25545/g26463/g30083/g30532/g31619/g3594/g46567/g48118/g48994/g49678/g53832/g55247/g55302/g62611/g62711/g63063/g7699/g7707/g9715	27	23	4
Cellular component	GO:0000307	cyclin-dependent protein kinase holoenzyme complex	4/4805	19/25048	0.508794	0.999977	g23690/g26893/g47773/g7077	4	2	2
Cellular component	GO:0005669	transcription factor TFIID complex	4/4805	19/25048	0.508794	0.999977	g11634/g19461/g46702/g61494	4	0	4
Cellular component	GO:0042170	plastid membrane	71/4805	370/25048	0.520053	0.999977	g1103/g11522/g12896/g13183/g13446/g1387/g17035/g17332/g17685/g18824/g19167/g20377/g20385/g20784/g21202/g23318/g24333/g24401/g24517/g24662/g25107/g25506/g26514/g26807/g30368/g31490/g32979/g33672/g34037/g34262/g34438/g35054/g35057/g36185/g36463/g36977/g40609/g40744/g41619/g42449/g42541/g42740/g43263/g43312/g43613/g4376/g45960/g47697/g47915/g48926/g49836/g50068/g50905/g50930/g5162/g52943/g54693/g547…	71	36	35
Cellular component	GO:0009897	external side of plasma membrane	3/4805	14/25048	0.520888	0.999977	g1249/g16907/g59507	3	2	1
Cellular component	GO:0030127	COPII vesicle coat	3/4805	14/25048	0.520888	0.999977	g13169/g17453/g5576	3	1	2
Cellular component	GO:0032588	trans-Golgi network membrane	3/4805	14/25048	0.520888	0.999977	g37637/g46042/g59808	3	1	2
Cellular component	GO:0043189	H4/H2A histone acetyltransferase complex	3/4805	14/25048	0.520888	0.999977	g19015/g49429/g9778	3	1	2
Cellular component	GO:1902562	H4 histone acetyltransferase complex	3/4805	14/25048	0.520888	0.999977	g19015/g49429/g9778	3	1	2
Cellular component	GO:0016469	proton-transporting two-sector ATPase complex	14/4805	72/25048	0.524966	0.999977	g10504/g19999/g21739/g31218/g34031/g356/g37085/g38869/g39670/g53220/g54958/g55115/g60817/g60931	14	11	3
Cellular component	GO:0030140	trans-Golgi network transport vesicle	6/4805	30/25048	0.527747	0.999977	g14037/g24423/g27416/g3846/g45863/g54431	6	5	1
Cellular component	GO:0010319	stromule	5/4805	25/25048	0.538592	0.999977	g11191/g11215/g29134/g42642/g62967	5	3	2
Cellular component	GO:0031969	chloroplast membrane	69/4805	362/25048	0.545195	0.999977	g1103/g11522/g12896/g13183/g13446/g1387/g17035/g17332/g17685/g18824/g20377/g20385/g20784/g21202/g23318/g24333/g24401/g24517/g24662/g25107/g25506/g26514/g26807/g30368/g31490/g32979/g33672/g34037/g34262/g34438/g35054/g35057/g36185/g36463/g36977/g40609/g40744/g41619/g42449/g42541/g42740/g43263/g43312/g43613/g4376/g45960/g47697/g47915/g48926/g49836/g50068/g50905/g50930/g5162/g52943/g54693/g54736/g553…	69	34	35
Cellular component	GO:0000419	RNA polymerase V complex	7/4805	36/25048	0.551005	0.999977	g26990/g27789/g34059/g54348/g61760/g61957/g8834	7	4	3
Cellular component	GO:0045261	proton-transporting ATP synthase complex, catalytic core F(1)	4/4805	20/25048	0.552267	0.999977	g31218/g37085/g55115/g60931	4	3	1
Cellular component	GO:0090575	RNA polymerase II transcription factor complex	13/4805	68/25048	0.554328	0.999977	g11163/g11210/g11213/g11634/g19461/g25336/g25337/g4367/g46702/g56236/g56237/g60244/g61494	13	3	10
Cellular component	GO:0005740	mitochondrial envelope	75/4805	395/25048	0.560203	0.999977	g10504/g10566/g12711/g14330/g17154/g17332/g17438/g17685/g18319/g19167/g19795/g19999/g21200/g24381/g24639/g25730/g25951/g26747/g27270/g27271/g27844/g29069/g29109/g30169/g31218/g32733/g33081/g33792/g34031/g3405/g34066/g34090/g37085/g3724/g38032/g38194/g3941/g39670/g40045/g40185/g41619/g4525/g47550/g48490/g49337/g50090/g50155/g50614/g51265/g51362/g51445/g53220/g53311/g54281/g5482/g55115/g55305/g5539…	75	56	19
Cellular component	GO:0000152	nuclear ubiquitin ligase complex	6/4805	31/25048	0.562355	0.999977	g20389/g20394/g2316/g25777/g5269/g53836	6	4	2
Cellular component	GO:0005689	U12-type spliceosomal complex	3/4805	15/25048	0.570772	0.999977	g25736/g3278/g34720	3	3	0
Cellular component	GO:0005847	mRNA cleavage and polyadenylation specificity factor complex	3/4805	15/25048	0.570772	0.999977	g42286/g42387/g58475	3	0	3
Cellular component	GO:0030874	nucleolar chromatin	3/4805	15/25048	0.570772	0.999977	g1873/g1926/g42267	3	1	2
Cellular component	GO:0005758	mitochondrial intermembrane space	5/4805	26/25048	0.576128	0.999977	g12711/g25730/g3724/g38194/g5482	5	4	1
Cellular component	GO:0005741	mitochondrial outer membrane	10/4805	53/25048	0.578486	0.999977	g17438/g19795/g24639/g25951/g34066/g34090/g3724/g54281/g58436/g58609	10	7	3
Cellular component	GO:0009501	amyloplast	7/4805	37/25048	0.582292	0.999977	g20664/g22408/g46489/g51250/g55021/g59752/g60849	7	2	5
Cellular component	GO:0005938	cell cortex	24/4805	128/25048	0.585242	0.999977	g12815/g1613/g192/g25071/g28559/g28748/g31639/g34514/g37118/g37699/g41951/g46317/g49297/g49316/g49456/g49458/g53434/g60023/g60444/g63729/g681/g682/g8717/g9711	24	13	11
Cellular component	GO:0044438	microbody part	12/4805	64/25048	0.585356	0.999977	g13117/g15489/g38327/g38481/g41271/g46455/g4715/g51365/g58436/g58609/g62504/g6843	12	7	5
Cellular component	GO:0044439	peroxisomal part	12/4805	64/25048	0.585356	0.999977	g13117/g15489/g38327/g38481/g41271/g46455/g4715/g51365/g58436/g58609/g62504/g6843	12	7	5
Cellular component	GO:0005887	integral component of plasma membrane	51/4805	271/25048	0.585368	0.999977	g11684/g12398/g1277/g13185/g13186/g13601/g17647/g18110/g18492/g18540/g1871/g1924/g21204/g21267/g22728/g24632/g29746/g31112/g31656/g33254/g35039/g41318/g42054/g43979/g43983/g45888/g45952/g4647/g50068/g50070/g50090/g51763/g53539/g53775/g53976/g54436/g55284/g57877/g60252/g60928/g61049/g61455/g63389/g63390/g7543/g7641/g7759/g8186/g8303/g8379/g8732	51	27	24
Cellular component	GO:0030133	transport vesicle	17/4805	91/25048	0.590611	0.999977	g10226/g10227/g12644/g13169/g14037/g14478/g15914/g17453/g24423/g27416/g3222/g3246/g3846/g45863/g54412/g54431/g5576	17	13	4
Cellular component	GO:0000777	condensed chromosome kinetochore	4/4805	21/25048	0.5936	0.999977	g11795/g31819/g40610/g41419	4	2	2
Cellular component	GO:0005655	nucleolar ribonuclease P complex	2/4805	10/25048	0.599069	0.999977	g4918/g4919	2	2	0
Cellular component	GO:0009533	chloroplast stromal thylakoid	2/4805	10/25048	0.599069	0.999977	g4178/g45952	2	1	1
Cellular component	GO:0030124	AP-4 adaptor complex	2/4805	10/25048	0.599069	0.999977	g25940/g56413	2	2	0
Cellular component	GO:0030677	ribonuclease P complex	2/4805	10/25048	0.599069	0.999977	g4918/g4919	2	2	0
Cellular component	GO:0030681	multimeric ribonuclease P complex	2/4805	10/25048	0.599069	0.999977	g4918/g4919	2	2	0
Cellular component	GO:0120025	plasma membrane bounded cell projection	24/4805	129/25048	0.601782	0.999977	g10226/g10227/g15914/g19876/g19882/g19883/g19886/g19889/g19993/g24953/g3222/g3246/g34669/g35501/g37233/g37677/g38093/g42330/g5260/g54335/g54441/g55318/g7979/g8184	24	10	14
Cellular component	GO:0005838	proteasome regulatory particle	5/4805	27/25048	0.61198	0.999977	g28623/g36834/g44074/g44118/g9738	5	2	3
Cellular component	GO:0012510	trans-Golgi network transport vesicle membrane	5/4805	27/25048	0.61198	0.999977	g14037/g24423/g3846/g45863/g54431	5	4	1
Cellular component	GO:0022624	proteasome accessory complex	5/4805	27/25048	0.61198	0.999977	g28623/g36834/g44074/g44118/g9738	5	2	3
Cellular component	GO:0005680	anaphase-promoting complex	3/4805	16/25048	0.617289	0.999977	g20389/g20394/g53836	3	1	2
Cellular component	GO:0005884	actin filament	3/4805	16/25048	0.617289	0.999977	g31639/g49000/g59058	3	3	0
Cellular component	GO:0031350	intrinsic component of plastid membrane	3/4805	16/25048	0.617289	0.999977	g23318/g45960/g9529	3	2	1
Cellular component	GO:0031351	integral component of plastid membrane	3/4805	16/25048	0.617289	0.999977	g23318/g45960/g9529	3	2	1
Cellular component	GO:0015630	microtubule cytoskeleton	76/4805	407/25048	0.623811	0.999977	g10889/g11719/g11750/g11753/g11754/g1258/g13057/g13272/g15335/g15733/g1613/g1618/g16901/g17327/g17340/g17369/g19074/g192/g20669/g21236/g21625/g24103/g24501/g24840/g26394/g26767/g28559/g28748/g30396/g31375/g31732/g34514/g35953/g36111/g37118/g37776/g38689/g404/g40610/g41244/g42609/g43988/g46317/g46322/g46490/g46498/g49456/g49458/g50507/g51402/g5232/g53434/g54995/g55215/g55267/g55539/g57430/g59776/g…	76	41	35
Cellular component	GO:0044798	nuclear transcription factor complex	14/4805	77/25048	0.633814	0.999977	g11163/g11210/g11213/g11634/g19461/g25336/g25337/g34059/g4367/g46702/g56236/g56237/g60244/g61494	14	4	10
Cellular component	GO:0000782	telomere cap complex	2/4805	11/25048	0.6532	0.999977	g4930/g59605	2	2	0
Cellular component	GO:0000783	nuclear telomere cap complex	2/4805	11/25048	0.6532	0.999977	g4930/g59605	2	2	0
Cellular component	GO:0008540	proteasome regulatory particle, base subcomplex	2/4805	11/25048	0.6532	0.999977	g36834/g9738	2	1	1
Cellular component	GO:0042555	MCM complex	2/4805	11/25048	0.6532	0.999977	g13674/g45169	2	0	2
Cellular component	GO:1902555	endoribonuclease complex	2/4805	11/25048	0.6532	0.999977	g4918/g4919	2	2	0
Cellular component	GO:1905348	endonuclease complex	2/4805	11/25048	0.6532	0.999977	g4918/g4919	2	2	0
Cellular component	GO:0005666	RNA polymerase III complex	3/4805	17/25048	0.660253	0.999977	g54348/g54946/g8834	3	2	1
Cellular component	GO:0005736	RNA polymerase I complex	3/4805	17/25048	0.660253	0.999977	g27789/g54348/g54946	3	2	1
Cellular component	GO:0031428	box C/D snoRNP complex	3/4805	17/25048	0.660253	0.999977	g20903/g45469/g60861	3	2	1
Cellular component	GO:0033116	endoplasmic reticulum-Golgi intermediate compartment membrane	3/4805	17/25048	0.660253	0.999977	g12307/g1291/g5576	3	2	1
Cellular component	GO:0090406	pollen tube	15/4805	84/25048	0.664395	0.999977	g19876/g19882/g19883/g19886/g19889/g19993/g24953/g34669/g37233/g37677/g42330/g5260/g54335/g54441/g55318	15	5	10
Cellular component	GO:0042995	cell projection	24/4805	133/25048	0.664996	0.999977	g10226/g10227/g15914/g19876/g19882/g19883/g19886/g19889/g19993/g24953/g3222/g3246/g34669/g35501/g37233/g37677/g38093/g42330/g5260/g54335/g54441/g55318/g7979/g8184	24	10	14
Cellular component	GO:0000322	storage vacuole	5/4805	29/25048	0.678062	0.999977	g35877/g43147/g55284/g59739/g61049	5	4	1
Cellular component	GO:0000326	protein storage vacuole	5/4805	29/25048	0.678062	0.999977	g35877/g43147/g55284/g59739/g61049	5	4	1
Cellular component	GO:0005732	small nucleolar ribonucleoprotein complex	5/4805	29/25048	0.678062	0.999977	g20903/g38988/g45469/g55012/g60861	5	4	1
Cellular component	GO:0031970	organelle envelope lumen	5/4805	29/25048	0.678062	0.999977	g12711/g25730/g3724/g38194/g5482	5	4	1
Cellular component	GO:0042788	polysomal ribosome	16/4805	91/25048	0.691939	0.999977	g11901/g11925/g2034/g3295/g3334/g3651/g40458/g42669/g48994/g49614/g50779/g53220/g53832/g56929/g62711/g7699	16	15	1
Cellular component	GO:0055029	nuclear DNA-directed RNA polymerase complex	20/4805	113/25048	0.692508	0.999977	g11163/g11210/g11213/g11634/g13647/g16946/g16947/g19461/g26990/g27789/g34059/g46702/g49077/g54348/g54946/g60244/g61494/g61760/g61957/g8834	20	7	13
Cellular component	GO:0000421	autophagosome membrane	3/4805	18/25048	0.699604	0.999977	g46490/g61626/g8490	3	1	2
Cellular component	GO:0016471	vacuolar proton-transporting V-type ATPase complex	3/4805	18/25048	0.699604	0.999977	g356/g54958/g60817	3	2	1
Cellular component	GO:0031595	nuclear proteasome complex	3/4805	18/25048	0.699604	0.999977	g1977/g36834/g9738	3	2	1
Cellular component	GO:0000243	commitment complex	2/4805	12/25048	0.701321	0.999977	g3278/g44938	2	1	1
Cellular component	GO:0005719	nuclear euchromatin	2/4805	12/25048	0.701321	0.999977	g12692/g40075	2	0	2
Cellular component	GO:0016328	lateral plasma membrane	2/4805	12/25048	0.701321	0.999977	g1249/g45888	2	1	1
Cellular component	GO:0032541	cortical endoplasmic reticulum	2/4805	12/25048	0.701321	0.999977	g12815/g37699	2	1	1
Cellular component	GO:0042807	central vacuole	2/4805	12/25048	0.701321	0.999977	g55284/g61049	2	2	0
Cellular component	GO:0005849	mRNA cleavage factor complex	4/4805	24/25048	0.702932	0.999977	g4147/g42286/g42387/g58475	4	0	4
Cellular component	GO:0043076	megasporocyte nucleus	4/4805	24/25048	0.702932	0.999977	g27724/g3261/g38318/g63231	4	2	2
Cellular component	GO:0043078	polar nucleus	4/4805	24/25048	0.702932	0.999977	g27724/g3261/g38318/g63231	4	2	2
Cellular component	GO:0090568	nuclear transcriptional repressor complex	4/4805	24/25048	0.702932	0.999977	g19689/g20194/g5207/g61509	4	1	3
Cellular component	GO:0009504	cell plate	8/4805	47/25048	0.70353	0.999977	g13875/g24423/g36111/g3846/g5206/g5232/g53292/g61626	8	6	2
Cellular component	GO:0042644	chloroplast nucleoid	5/4805	30/25048	0.708125	0.999977	g17620/g38031/g54123/g9828/g9845	5	3	2
Cellular component	GO:0048471	perinuclear region of cytoplasm	6/4805	36/25048	0.714068	0.999977	g23381/g23382/g30396/g37699/g52152/g9431	6	3	3
Cellular component	GO:0000428	DNA-directed RNA polymerase complex	21/4805	120/25048	0.715519	0.999977	g11163/g11210/g11213/g11634/g13647/g16946/g16947/g19461/g26990/g27789/g34059/g42642/g46702/g49077/g54348/g54946/g60244/g61494/g61760/g61957/g8834	21	8	13
Cellular component	GO:0030880	RNA polymerase complex	21/4805	120/25048	0.715519	0.999977	g11163/g11210/g11213/g11634/g13647/g16946/g16947/g19461/g26990/g27789/g34059/g42642/g46702/g49077/g54348/g54946/g60244/g61494/g61760/g61957/g8834	21	8	13
Cellular component	GO:0005777	peroxisome	52/4805	290/25048	0.729164	0.999977	g11181/g11545/g12192/g12431/g13117/g15489/g16057/g16058/g16083/g19757/g19918/g19939/g20025/g21289/g23950/g24439/g25393/g25730/g25746/g26200/g26220/g26511/g28952/g30206/g32447/g3659/g38327/g38481/g41271/g42641/g42642/g43411/g45924/g460/g46282/g46455/g4715/g51365/g53046/g54200/g54645/g54880/g55008/g55495/g57324/g58412/g58436/g58609/g59022/g59172/g62504/g6843	52	38	14
Cellular component	GO:0042579	microbody	52/4805	290/25048	0.729164	0.999977	g11181/g11545/g12192/g12431/g13117/g15489/g16057/g16058/g16083/g19757/g19918/g19939/g20025/g21289/g23950/g24439/g25393/g25730/g25746/g26200/g26220/g26511/g28952/g30206/g32447/g3659/g38327/g38481/g41271/g42641/g42642/g43411/g45924/g460/g46282/g46455/g4715/g51365/g53046/g54200/g54645/g54880/g55008/g55495/g57324/g58412/g58436/g58609/g59022/g59172/g62504/g6843	52	38	14
Cellular component	GO:0044448	cell cortex part	19/4805	110/25048	0.731052	0.999977	g12815/g1613/g25071/g28559/g28748/g31639/g34514/g37118/g37699/g41951/g46317/g49297/g49316/g53434/g60444/g681/g682/g8717/g9711	19	11	8
Cellular component	GO:0030684	preribosome	9/4805	54/25048	0.732774	0.999977	g18420/g20903/g40954/g45469/g47482/g53651/g5553/g55793/g60861	9	7	2
Cellular component	GO:0000229	cytoplasmic chromosome	3/4805	19/25048	0.73538	0.999977	g12322/g14186/g20784	3	1	2
Cellular component	GO:0099568	cytoplasmic region	24/4805	138/25048	0.736061	0.999977	g12815/g1613/g192/g25071/g28559/g28748/g31639/g34514/g37118/g37699/g41951/g46317/g49297/g49316/g49456/g49458/g53434/g60023/g60444/g63729/g681/g682/g8717/g9711	24	13	11
Cellular component	GO:0005844	polysome	18/4805	105/25048	0.73937	0.999977	g11901/g11925/g2034/g27326/g28807/g3295/g3334/g3651/g40458/g42669/g48994/g49614/g50779/g53220/g53832/g56929/g62711/g7699	18	15	3
Cellular component	GO:0005779	integral component of peroxisomal membrane	2/4805	13/25048	0.743747	0.999977	g13117/g38481	2	2	0
Cellular component	GO:0031231	intrinsic component of peroxisomal membrane	2/4805	13/25048	0.743747	0.999977	g13117/g38481	2	2	0
Cellular component	GO:0042646	plastid nucleoid	7/4805	43/25048	0.743761	0.999977	g14186/g17620/g20784/g38031/g54123/g9828/g9845	7	4	3
Cellular component	GO:0048226	Casparian strip	4/4805	26/25048	0.762981	0.999977	g18775/g25226/g25936/g34061	4	2	2
Cellular component	GO:0005677	chromatin silencing complex	3/4805	20/25048	0.767695	0.999977	g19689/g20194/g61509	3	1	2
Cellular component	GO:0005685	U1 snRNP	3/4805	20/25048	0.767695	0.999977	g25736/g44938/g55012	3	2	1
Cellular component	GO:0030120	vesicle coat	8/4805	50/25048	0.768894	0.999977	g13169/g14037/g17453/g24423/g3846/g45863/g54431/g5576	8	5	3
Cellular component	GO:0016591	RNA polymerase II, holoenzyme	13/4805	79/25048	0.772482	0.999977	g11163/g11210/g11213/g11634/g13647/g16946/g16947/g19461/g46702/g54348/g54946/g60244/g61494	13	3	10
Cellular component	GO:0000323	lytic vacuole	14/4805	85/25048	0.777167	0.999977	g16901/g23998/g30784/g34606/g34613/g356/g37739/g37804/g40562/g43078/g53502/g53984/g5831/g61899	14	10	4
Cellular component	GO:0005686	U2 snRNP	2/4805	14/25048	0.78089	0.999977	g25736/g34720	2	2	0
Cellular component	GO:0031354	intrinsic component of plastid outer membrane	2/4805	14/25048	0.78089	0.999977	g23318/g9529	2	2	0
Cellular component	GO:0031355	integral component of plastid outer membrane	2/4805	14/25048	0.78089	0.999977	g23318/g9529	2	2	0
Cellular component	GO:0031358	intrinsic component of chloroplast outer membrane	2/4805	14/25048	0.78089	0.999977	g23318/g9529	2	2	0
Cellular component	GO:0031359	integral component of chloroplast outer membrane	2/4805	14/25048	0.78089	0.999977	g23318/g9529	2	2	0
Cellular component	GO:0032585	multivesicular body membrane	2/4805	14/25048	0.78089	0.999977	g17030/g46256	2	1	1
Cellular component	GO:0043073	germ cell nucleus	2/4805	14/25048	0.78089	0.999977	g39188/g7611	2	1	1
Cellular component	GO:0030118	clathrin coat	6/4805	39/25048	0.785581	0.999977	g14037/g24423/g3846/g45863/g54431/g56284	6	4	2
Cellular component	GO:0044426	cell wall part	6/4805	39/25048	0.785581	0.999977	g18775/g25226/g25936/g34061/g58779/g59808	6	2	4
Cellular component	GO:0044462	external encapsulating structure part	6/4805	39/25048	0.785581	0.999977	g18775/g25226/g25936/g34061/g58779/g59808	6	2	4
Cellular component	GO:0031514	motile cilium	4/4805	27/25048	0.789242	0.999977	g35501/g38093/g7979/g8184	4	0	4
Cellular component	GO:0005667	transcription factor complex	23/4805	137/25048	0.792611	0.999977	g11163/g11210/g11213/g11634/g16992/g17870/g19461/g19902/g19971/g25336/g25337/g34059/g4367/g43813/g46702/g47882/g47985/g55280/g56236/g56237/g59927/g60244/g61494	23	10	13
Cellular component	GO:0030658	transport vesicle membrane	10/4805	63/25048	0.793296	0.999977	g13169/g14037/g14478/g17453/g24423/g3846/g45863/g54412/g54431/g5576	10	7	3
Cellular component	GO:0005743	mitochondrial inner membrane	53/4805	303/25048	0.794194	0.999977	g10504/g10566/g12711/g14330/g17154/g17332/g17685/g18319/g19795/g19999/g24381/g25730/g26747/g27270/g27271/g27844/g29069/g29109/g30169/g31218/g32733/g33081/g34031/g3405/g37085/g3724/g38032/g38194/g3941/g39670/g40045/g40185/g41619/g4525/g47550/g48490/g50155/g50614/g51362/g51445/g53220/g5482/g55115/g55305/g55393/g5655/g58774/g60931/g61228/g62158/g62308/g62541/g9877	53	44	9
[truncated: 3,540 more rows]

## Sheet: S19-S2_vs_S19-S4
Ontology	ID	Description	GeneRatio	BgRatio	pvalue	p.adjust	geneID	Count	up	down
[truncated: 3,329 more rows]

## Sheet: S19-S4_vs_BS-S4
Ontology	ID	Description	GeneRatio	BgRatio	pvalue	p.adjust	geneID	Count	up	down
[truncated: 3,883 more rows]
