# Supplementary material for: Integrated Metabolomic and Transcriptomic Analyses Reveal the Basis for Carotenoid Biosynthesis in Sweet Potato (Ipomoea batatas (L.) Lam.) Storage Roots
Source: Metabolites. 2022 Oct 23;12(11):1010. doi: 10.3390/metabo12111010 (PMC9699360; doi:10.3390/metabo12111010)
Supplement: Supplementary file 1 [file metabolites-12-01010-s001.zip › Table S4. Statistical table of DEGs in four groups of L14 and L19.xlsx]

## Sheet: DEGs
GeneID	S19_S2 vs BS_S2 Log2FC	S19_S4 vs BS_S4Log2FC	S19_S2 vs S19_S4 Log2FC	BS_S2 vs BS_S4Log2FC	Description
g11630	-3.93996	*	*	3.6211	15-cis-phytoene synthase, PSY
g16874	*	*	*	-1.45502	15-cis-phytoene synthase, PSY
g29616	1.62586	1.14067	*	*	15-cis-phytoene synthase, PSY
g59407	*	-2.38983	*	*	prolycopene isomerase，ZEBRA2
g20008	*	-1.69281	*	*	lycopene epsilon-cyclase, LCYe
g1548	*	*	-2.25209	-1.69817	β-carotene 3-hydroxylase, CHYB
g953	*	*	-2.14379	-1.83736	β-carotene 3-hydroxylase, CHYB
g49586	1.29198	2.62511	-1.61078	*	β-carotene isomerase, DWARF27
g30428	*	2.45715	*	1.53625	9',10'-cleaving dioxygenase, CCD7
g21348	1.14068	2.91959	-2.66945	*	carlactone synthase, CCD8
g1103	-2.64763	*	-2.00015	*	zeaxanthin epoxidase, ZEP
g14443	-7.85175	*	*	6.79442	zeaxanthin epoxidase, ZEP
g38553	1.7952	*	*	-1.70138	zeaxanthin epoxidase, ZEP
g41700	2.13907	1.95779	*	*	zeaxanthin epoxidase, ZEP
g14444	-4.9542	-8.09979	3.14559	*	zeaxanthin epoxidase, ZEP
g28126	*	-3.24283	1.09419	-1.54708	violaxanthin de-epoxidase, VDE
g31082	-1.34742	-2.57887	*	-0.934044	violaxanthin de-epoxidase, VDE
g21310	-2.84983	-3.81589	2.25171	1.28564	9-cis-epoxycarotenoid dioxygenase,NCED
g36276	-3.86231	-6.89847	*	-2.65146	9-cis-epoxycarotenoid dioxygenase,NCED
g38486	*	-1.33989	*	-1.13418	9-cis-epoxycarotenoid dioxygenase,NCED
g43412	*	1.24464	-3.26911	-1.93109	9-cis-epoxycarotenoid dioxygenase,NCED
g54338	*	2.341	-3.98913	-1.89829	9-cis-epoxycarotenoid dioxygenase,NCED
g8145	1.8152	4.42467	-2.64111	*	9-cis-epoxycarotenoid dioxygenase,NCED
g10759	*	1.03378	-1.25089	*	xanthoxin dehydrogenase, ABA2
g10762	*	1.12707	-1.51	*	xanthoxin dehydrogenase, ABA2
g10765	-4.8709	-5.31716	1.65061	1.20436	xanthoxin dehydrogenase, ABA2
g10773	*	-1.58081	1.90941	*	xanthoxin dehydrogenase, ABA2
g10806	*	*	-1.00419	*	xanthoxin dehydrogenase, ABA2
g34783	-1.86853	1.20203	-4.62223	-1.55167	xanthoxin dehydrogenase, ABA2
g34785	4.22612	6.39669	-2.78596	*	xanthoxin dehydrogenase, ABA2
g41569	5.51258	6.00749	-3.8413	-3.34639	xanthoxin dehydrogenase, ABA2
g41600	1.40161	2.23996	-1.11651	*	xanthoxin dehydrogenase, ABA2
g45467	*	1.89814	-1.05235	*	xanthoxin dehydrogenase, ABA2
g45788	8.98774	6.65821	*	-2.32953	xanthoxin dehydrogenase, ABA2
g4684	2.04001	2.57174	*	*	xanthoxin dehydrogenase, ABA2
g9497	-1.36897	-1.20674	-1.13776	*	xanthoxin dehydrogenase, ABA2
g34128	-11.6622	-11.6607	*	*	abscisic acid 8'-hydroxylase, CYP707A
g41764	*	*	-1.81178	-1.53408	abscisic acid 8'-hydroxylase, CYP707A
g60411	*	-1.53528	1.91387	*	abscisic acid 8'-hydroxylase, CYP707A
g60684	1.66221	-2.4916	*	-3.96642	abscisic acid 8'-hydroxylase, CYP707A
	*insignificant	|Log2FC|≥1
