# Supplementary material for: Integrated Metabolomic and Transcriptomic Analyses Reveal the Basis for Carotenoid Biosynthesis in Sweet Potato (Ipomoea batatas (L.) Lam.) Storage Roots
Source: Metabolites. 2022 Oct 23;12(11):1010. doi: 10.3390/metabo12111010 (PMC9699360; doi:10.3390/metabo12111010)
Supplement: Supplementary file 1 [file metabolites-12-01010-s001.zip › Table S5. Statistical table of DAMs in four groups of samples.xlsx]

## Sheet: Sheet1
Component Name	Compounds	S19_S2 vs BS_S2 Log2FC	S19_S4 vs BS_S4 Log2FC		BS_S2 vs BS_S4 Log2FC	S19_S2 vs S19_S4 Log2FC
				Lutein
	Antheraxanthin	1.13717	*		*	*
	Violaxanthin	1.74668	1.79094		*	*
	Neoxanthin	1.7813	1.69486		*	*
	Lutein	*	*		*	*
	β-Cryptoxanthin	6.43002	6.79609		*	*
	Apocarote--l	1.16122	-2.15381		-2.97269	*
	echinenone	2.46554	2.23675		*	*
				Carotene ester
	lutein palmitate	10.1603	10.122		*	*
	lutein dimyristate	*	9.77314		9.77314	*
	violaxanthin dipalmitate	6.98489	6.60881		*	*
	zeaxanthin palmitate	3.4027	11.7204		*	-8.56224
				Carotene
	β-Carotene	1.07166	*		*	*
				Abscisic acid
	Abscisic acid	1.07824	1.75082		*	*
	ABA-glucosyl ester	1.36412	1.13088		*	*
	*insignificant	|Log2FC|≥1
