# Supplementary material for: Integrated Metabolomic and Transcriptomic Analyses Reveal the Basis for Carotenoid Biosynthesis in Sweet Potato (Ipomoea batatas (L.) Lam.) Storage Roots
Source: Metabolites. 2022 Oct 23;12(11):1010. doi: 10.3390/metabo12111010 (PMC9699360; doi:10.3390/metabo12111010)
Supplement: Supplementary file 1 [file metabolites-12-01010-s001.zip › Table S6 TFs classification .xlsx]

## Sheet: classification
Component name	Category	Gene name	Up-Regulation DEGs	Down-Regulation DEGs	Description
BS-S2_vs_BS-S4
	TF
		AP2/ERF	12	33	Ethylene-responsive transcription factor
		B3	4	7	B3 domain-containing transcription factor
		BES1	*	1	β-amylase
		bHLH	6	28	Basic/helix-loop-helix proteins
		bZIP	2	11	Light-inducible protein
		C2C2	4	9	Zinc finger protein
		C2H2	1	8	Zinc finger protein
		C3H	*	2	Zinc finger CCCH domain-containing protein
		CPP	*	1	Protein tesmin/TSO1-like
		DBB	1		B-box type zinc finger protein
		E2F	*	2	Transcription factor-like protein
		FAR1	2	1	Cysteine-rich receptor-like protein kinase
		GARP	4	5	Two-component response regulator
		GeBP	1		STOREKEEPER protein
		GRAS	7	4	Scarecrow-like protein
		HB	9	5	Homeobox-leucine zipper protein
		HSF	2	6	Heat shock factor protein
		LIM	*	1	LIM domain-containing protein
		LOB	5	6	LOB domain-containing protein
		MADS	1	3	MADS-box protein
		MYB	10	18	MYB factors
		NAC	3	10	NAM, ATAF, and CUC (NAC) transcription factors
		NF	4	1	Nuclear transcription factor
		OFP	1	2	Transcription repressor
		PLATZ	*	3	Uncharacterized protein
		RWP-RK	*	1	Protein NRT1/ PTR FAMILY
		SBP	5	*	Squamosa promoter-binding protein
		SRS	1	1	Protein SHI RELATED SEQUENCE
		TCP	*	1	Glutamate receptor
		Tify	*	10	Protein TIFY
		Trihelix	*	5	Trihelix transcription factor
		TUB	*	1	Tubby-like F-box protein
		WRKY	3	11	WRKY transcription factor
		zf-HD	*	1	Zinc-finger homeodomain protein
		In total	88	198
	TR
		AUX/IAA	*	8	Auxin-responsive protein
		DDT	1	*	DDT domain-containing protein
		GNAT	2	2	N-acetyltransferase
		HMG	*	3	HMG1/2-like protein
		IWS1	*	1	Uncharacterized protein
		Jumonji	*	1	Uncharacterized protein
		mTERF	*	1	Transcription termination factor
		Others	5	10	*
		PHD	*	1	Methyl-CpG-binding domain-containing protein
		SET	*	1	Ribulose-1,5 bisphosphate carboxylase/oxygenase large subunit N-methyltransferase, chloroplastic
		SNF2	*	2	SWI/SNF-related matrix-associated actin-dependent regulator of chromatin subfamily A-like protein
		SWI/SNF	*	2	Zinc finger CCCH domain-containing protein
		TAZ	*	2	Histone acetyltransferase
		TRAF	2	*	Regulatory protein
		In total	10	34
S19-S2_vs_S19-S4
	TF
		AP2/ERF	3	36	Ethylene-responsive transcription factor
		B3	3	5	B3 domain-containing transcription factor
		BES1	*	1	β-amylase
		bHLH	*	24	Basic/helix-loop-helix proteins
		bZIP	1	7	Light-inducible protein
		C2C2	3	14	Zinc finger protein
		C2H2	4	7	Zinc finger protein
		C3H	4	*	Zinc finger CCCH domain-containing protein
		CPP	*	2	Protein tesmin/TSO1-like
		DBB	*	1	B-box type zinc finger protein
		E2F	1	1	Transcription factor-like protein
		FAR1	5	*	Cysteine-rich receptor-like protein kinase
		GARP	1	3	Two-component response regulator
		GRAS	2	6	Scarecrow-like protein
		GRF	3	*	Growth-regulating factor
		HB	3	13	Homeobox-leucine zipper protein
		HSF	2	6	Heat shock factor protein
		LOB	*	6	LOB domain-containing protein
		MADS	3	*	MADS-box protein
		MYB	5	13	MYB factors
		NAC	5	13	NAM, ATAF, and CUC (NAC) transcription factors
		NF	2	2	Nuclear transcription factor
		OFP	*	4	Transcription repressor
		PLATZ	1	1	Uncharacterized protein
		RWP-RK	*	1	Protein NRT1/ PTR FAMILY
		SBP	*	7	Squamosa promoter-binding protein
		SRS	*	2	Protein SHI RELATED SEQUENCE
		Tify	*	5	Protein TIFY
		Trihelix	2	2	Trihelix transcription factor
		TUB	2	*	Tubby-like F-box protein
		WRKY	2	14	WRKY transcription factor
		zf-HD	1	1	Zinc-finger homeodomain protein
		In total	58	197
	TR
		ARID	1	*	AT-rich interactive domain-containing protein
		AUX/IAA	1	7	Auxin-responsive protein
		DDT	1	2	DDT domain-containing protein
		GNAT	2	1	N-acetyltransferase
		HMG	*	4	HMG1/2-like protein
		Jumonji	*	2	Uncharacterized protein
		mTERF	1	*	Transcription termination factor
		Others	7	14	*
		PHD	1	2	Methyl-CpG-binding domain-containing protein
		Pseudo ARR-B	3	*	Two-component response regulator
		SET	*	3	Ribulose-1,5 bisphosphate carboxylase/oxygenase large subunit N-methyltransferase, chloroplastic
		SNF2	*	2	SWI/SNF-related matrix-associated actin-dependent regulator of chromatin subfamily A-like protein
		TAZ	1	1	Histone acetyltransferase
		TRAF	*	1	Regulatory protein
		In total	18	39
S19-S2_vs_BS-S2
	TF
		AP2/ERF	26	9	Ethylene-responsive transcription factor
		B3	5	9	B3 domain-containing transcription factor
		BBR-BPC	1	*	Protein BASIC PENTACYSTEINE2-lik
		BES1	1	*	β-amylase
		bHLH	26	5	Basic/helix-loop-helix proteins
		bZIP	4	5	Light-inducible protein
		C2C2	8	8	Zinc finger protein
		C2H2	11	3	Zinc finger protein
		C3H	3	12	Zinc finger CCCH domain-containing protein
		CPP	1	1	Protein tesmin/TSO1-like
		CSD	1	*	Cold shock domain-containing protein
		DBP	1	*	protein phosphatase
		E2F	2	1	Transcription factor-like protein
		FAR1	3	10	Cysteine-rich receptor-like protein kinase
		GARP	4	5	Two-component response regulator
		GRAS	4	4	Scarecrow-like protein
		GRF	1	1	Growth-regulating factor
		HB	10	10	Homeobox-leucine zipper protein
		HRT	*	1	Protein EFFECTOR OF TRANSCRIPTION
		HSF	4	4	Heat shock factor protein
		LFY	2	*	Uncharacterized protein
		LIM	1	*	LIM domain-containing protein
		LOB	8	4	LOB domain-containing protein
		MADS	9	2	MADS-box protein
		MYB	26	11	MYB factors
		NAC	19	3	NAM, ATAF, and CUC (NAC) transcription factors
		NF	2	3	Nuclear transcription factor
		OFP	5	1	Transcription repressor
		PLATZ	2	2	Uncharacterized protein
		RWP-RK	1	3	Protein NRT1/ PTR FAMILY
		S1Fa-like	*	1	*
		SBP	2	3	Squamosa promoter-binding protein
		SRS	*	1	Protein SHI RELATED SEQUENCE
		TCP	5	5	Glutamate receptor
		Tify	14	1	Protein TIFY
		Trihelix	7	1	Trihelix transcription factor
		WRKY	11	5	WRKY transcription factor
		zf-HD	1	*	Zinc-finger homeodomain protein
		In total	231	134
	TR
		ARID	*	1	AT-rich interactive domain-containing protein
		AUX/IAA	8	2	Auxin-responsive protein
		DDT	*	2	DDT domain-containing protein
		GNAT	6	1	N-acetyltransferase
		HMG	4	*	HMG1/2-like protein
		IWS1	1	2	Uncharacterized protein
		Jumonji	2	2	Uncharacterized protein
		mTERF	3	6	Transcription termination factor
		Others	6	4	*
		PHD	1	5	Methyl-CpG-binding domain-containing protein
		Pseudo ARR-B	2	1	Two-component response regulator
		SET	3	4	Ribulose-1,5 bisphosphate carboxylase/oxygenase large subunit N-methyltransferase, chloroplastic
		SNF2	4	14	SWI/SNF-related matrix-associated actin-dependent regulator of chromatin subfamily A-like protein
		SWI/SNF	*	1	Zinc finger CCCH domain-containing protein
		TAZ	*	2	Histone acetyltransferase
		TRAF	1	1	Regulatory protein
		In total	41	48
S19-S4_vs_BS-S4
	TF
		Alfin-like	2	*	PHD finger protein
		AP2/ERF	34	13	Ethylene-responsive transcription factor
		B3	6	15	B3 domain-containing transcription factor
		BES1	1	*	β-amylase
		bHLH	26	10	Basic/helix-loop-helix proteins
		bZIP	7	9	Light-inducible protein
		C2C2	16	14	Zinc finger protein
		C2H2	14	10	Zinc finger protein
		C3H	4	14	Zinc finger CCCH domain-containing protein
		CPP	1	*	Protein tesmin/TSO1-like
		CSD	1	1	Cold shock domain-containing protein
		DBB	1	*	B-box type zinc finger protein
		E2F	2	1	Transcription factor-like protein
		EIL	*	1	ETHYLENE INSENSITIVE protein
		FAR1	2	17	Cysteine-rich receptor-like protein kinase
		GARP	9	6	Two-component response regulator
		GeBP	2	*	STOREKEEPER protein
		GRAS	12	11	Scarecrow-like protein
		GRF	2	3	Growth-regulating factor
		HB	27	12	Homeobox-leucine zipper protein
		HSF	5	7	Heat shock factor protein
		LFY	2	*	Uncharacterized protein
		LIM	1	*	LIM domain-containing protein
		LOB	13	9	LOB domain-containing protein
		MADS	16	6	MADS-box protein
		MYB	32	14	MYB factors
		NAC	24	7	NAM, ATAF, and CUC (NAC) transcription factors
		NF	4	*	Nuclear transcription factor
		OFP	8	*	Transcription repressor
		PLATZ	2	4	Uncharacterized protein
		RWP-RK	1	5	Protein NRT1/ PTR FAMILY
		SBP	8	1	Squamosa promoter-binding protein
		SET	5	9	Ribulose-1,5 bisphosphate carboxylase/oxygenase large subunit N-methyltransferase, chloroplastic
		SNF2	7	21	SWI/SNF-related matrix-associated actin-dependent regulator of chromatin subfamily A-like protein
		SRS	3	*	Protein SHI RELATED SEQUENCE
		TCP	6	3	Glutamate receptor
		Tify	6	3	Protein TIFY
		Trihelix	7	6	Trihelix transcription factor
		TUB	1	1	Tubby-like F-box protein
		WRKY	14	6	WRKY transcription factor
		zf-HD	1	3	Zinc-finger homeodomain protein
		In total	335	242
	TR
		ARID	1	4	AT-rich interactive domain-containing protein
		AUX/IAA	7	4	Auxin-responsive protein
		GNAT	6	1	N-acetyltransferase
		mTERF	1	7	Transcription termination factor
		Others	20	15	*
		HMG	4	3	HMG1/2-like protein
		IWS1	*	2	Uncharacterized protein
		Jumonji	2	3	Uncharacterized protein
		PHD	1	9	Methyl-CpG-binding domain-containing protein
		SWI/SNF	7	21	Zinc finger CCCH domain-containing protein
		TAZ	*	2	Histone acetyltransferase
		TRAF	5	1	Regulatory protein
		In total	54	72
