# Supplementary material for: Integrated Metabolomic and Transcriptomic Analyses Reveal the Basis for Carotenoid Biosynthesis in Sweet Potato (Ipomoea batatas (L.) Lam.) Storage Roots
Source: Metabolites. 2022 Oct 23;12(11):1010. doi: 10.3390/metabo12111010 (PMC9699360; doi:10.3390/metabo12111010)
Supplement: Supplementary file 1 [file metabolites-12-01010-s001.zip › Table S7 Transcription factor.xlsx]

## Sheet: BS-S2_vs_BS-S4
ID	Family	Category	Classification	BSS2	BSS4	log2FoldChange	regulated	chr	start	end	strand	gene_name	gene_description	KEGG	NR	Swissprot	Tremble	KOG	GO	Pfam
g1002	bHLH	TF	bHLH	281	6	-5.383	down	LG1	5830227	5837977	+	--	--	K13422 transcription factor MYC2 | (RefSeq) MYC2; Basic helix-loop-helix (bHLH) DNA-binding family protein (A)	PREDICTED: transcription factor bHLH25-like [Ipomoea nil]	RecName: Full=Transcription factor bHLH25; AltName: Full=Basic helix-loop-helix protein 25; Short=AtbHLH25; Short=bHLH 25; AltName: Full=Transcription factor EN 29; AltName: Full=bHLH transcription factor bHLH025;	SubName: Full=Transcription factor HAND2/Transcription factor TAL1/TAL2/LYL1 {ECO:0000313|EMBL:PIN24638.1};	--	GO:0005634,nucleus; GO:0003677,DNA binding; GO:0003700,DNA-binding transcription factor activity; GO:0046983,protein dimerization activity; GO:0006355,regulation of transcription, DNA-templated; GO:0006351,transcription, DNA-templated	Helix-loop-helix DNA-binding domain
g10049	MYB	TF	MYB->MYB	190	620	1.707	up	LG3	4252715	4254563	+	--	--	K09422 transcription factor MYB, plant | (RefSeq) MYB59; myb domain protein 59 (A)	PREDICTED: myb-related protein MYBAS2-like isoform X1 [Ipomoea nil]	RecName: Full=Transcription factor MYB59; AltName: Full=Myb-related protein 59; Short=AtMYB59;	SubName: Full=Transcription factor myb48 {ECO:0000313|EMBL:OIT02065.1};	Transcription factor, Myb superfamily	GO:0005634,nucleus; GO:0003700,DNA-binding transcription factor activity; GO:0000981,DNA-binding transcription factor activity, RNA polymerase II-specific; GO:0043565,sequence-specific DNA binding; GO:0001135,RNA polymerase II transcription regulator recruiting activity; GO:0044212,transcription regulatory region DNA binding; GO:0030154,cell differentiation; GO:0006357,regulation of transcription…	Myb-like DNA-binding domain
g10099	AP2/ERF-AP2	TF	AP2/ERF->AP2/ERF-AP2	1224	172	-2.833	down	LG3	4618335	4622499	+	--	--	K09284 AP2-like factor, euAP2 lineage | (RefSeq) AP2; Integrase-type DNA-binding superfamily protein (A)	PREDICTED: AP2-like ethylene-responsive transcription factor TOE3 isoform X2 [Ipomoea nil]	RecName: Full=Floral homeotic protein APETALA 2 {ECO:0000303|PubMed:7919989};	SubName: Full=ethylene-responsive transcription factor RAP2-7-like isoform X1 {ECO:0000313|RefSeq:XP_009784819.1};	--	GO:0005634,nucleus; GO:0003677,DNA binding; GO:0003700,DNA-binding transcription factor activity; GO:0030154,cell differentiation; GO:0009908,flower development; GO:0010073,meristem maintenance; GO:0048481,plant ovule development; GO:0048316,seed development; GO:0010093,specification of floral organ identity; GO:0006351,transcription, DNA-templated	AP2 domain
g10108	C2C2-Dof	TF	C2C2->C2C2-Dof	3013	1357	-1.151	down	LG3	4686972	4693802	+	--	--	K16222 Dof zinc finger protein DOF5.5 | (RefSeq) CDF1; cycling DOF factor 1 (A)	PREDICTED: dof zinc finger protein DOF2.1-like [Ipomoea nil]	RecName: Full=Dof zinc finger protein DOF5.3; Short=AtDOF5.3;	SubName: Full=Uncharacterized protein {ECO:0000313|EMBL:CDP08935.1};	--	GO:0005634,nucleus; GO:0003700,DNA-binding transcription factor activity; GO:0046872,metal ion binding; GO:0044212,transcription regulatory region DNA binding; GO:0006355,regulation of transcription, DNA-templated; GO:0048364,root development; GO:0006351,transcription, DNA-templated	Dof domain, zinc finger
g10197	C2C2-GATA	TF	C2C2->C2C2-GATA	316	137	-1.203	down	LG3	5374083	5377830	-	--	--	--	PREDICTED: GATA transcription factor 11-like [Ipomoea nil]	RecName: Full=GATA transcription factor 11;	SubName: Full=Gata transcription factor 11 {ECO:0000313|EMBL:OIT19906.1};	GATA-4/5/6 transcription factors	GO:0005634,nucleus; GO:0005667,transcription factor complex; GO:0003682,chromatin binding; GO:0003700,DNA-binding transcription factor activity; GO:0000977,RNA polymerase II regulatory region sequence-specific DNA binding; GO:0001085,RNA polymerase II transcription factor binding; GO:0001228,DNA-binding transcription activator activity, RNA polymerase II-specific; GO:0008270,zinc ion binding; GO:…	GATA zinc finger
g1041	GRAS	TF	GRAS	1	12	4.294	up	LG1	6102390	6104292	-	--	--	K14494 DELLA protein | (RefSeq) RGL2; RGA-like 2 (A)	PREDICTED: protein SHORT-ROOT-like [Ipomoea nil]	RecName: Full=Protein SHORT-ROOT; Short=AtSHR; AltName: Full=GRAS family protein 26; Short=AtGRAS-26; AltName: Full=Protein SHOOT GRAVITROPISM 7;	SubName: Full=protein SHORT-ROOT-like {ECO:0000313|RefSeq:XP_016479900.1, ECO:0000313|RefSeq:XP_016479901.1};	--	GO:0005769,early endosome; GO:0005770,late endosome; GO:0005634,nucleus; GO:0055037,recycling endosome; GO:0003700,DNA-binding transcription factor activity; GO:0043565,sequence-specific DNA binding; GO:0008356,asymmetric cell division; GO:0055072,iron ion homeostasis; GO:0048366,leaf development; GO:0045930,negative regulation of mitotic cell cycle; GO:0009956,radial pattern formation; GO:003235…	GRAS domain family
g1049	GNAT	TR	GNAT	73	380	2.386	up	LG1	6143181	6145172	-	--	--	--	PREDICTED: probable N-acetyltransferase HLS1 [Ipomoea nil]	RecName: Full=Probable N-acetyltransferase HLS1; EC=2.3.1.-; AltName: Full=Protein CONSTITUTIVE PHOTOMORPHOGENIC 3; AltName: Full=Protein HOOKLESS 1; AltName: Full=Protein UNUSUAL SUGAR RESPONSE 2;	SubName: Full=Uncharacterized protein {ECO:0000313|EMBL:PIN25698.1};	--	GO:0008080,N-acetyltransferase activity; GO:0016747,transferase activity, transferring acyl groups other than amino-acyl groups; GO:0009734,auxin-activated signaling pathway; GO:0009640,photomorphogenesis; GO:0006473,protein acetylation; GO:0040008,regulation of growth; GO:0009723,response to ethylene; GO:0009826,unidimensional cell growth	Acetyltransferase (GNAT) domain
g10520	MYB	TF	MYB->MYB	80	28	-1.509	down	LG3	7984637	7986813	-	--	--	K09422 transcription factor MYB, plant | (RefSeq) MYB61; myb domain protein 61 (A)	PREDICTED: transcription factor MYB86-like [Ipomoea nil]	RecName: Full=Transcription factor MYB61 {ECO:0000305}; AltName: Full=Myb-related protein 61 {ECO:0000305}; Short=AtMYB61 {ECO:0000303|PubMed:16005292};	SubName: Full=transcription factor MYB86-like {ECO:0000313|RefSeq:XP_016450602.1};	Transcription factor, Myb superfamily	GO:0005634,nucleus; GO:0003700,DNA-binding transcription factor activity; GO:0000981,DNA-binding transcription factor activity, RNA polymerase II-specific; GO:0043565,sequence-specific DNA binding; GO:0001135,RNA polymerase II transcription regulator recruiting activity; GO:0044212,transcription regulatory region DNA binding; GO:0030154,cell differentiation; GO:0010087,phloem or xylem histogenesi…	Myb-like DNA-binding domain
g1212	C2C2-CO-like	TF	C2C2->C2C2-CO-like	448	1022	1.188	up	LG1	7231008	7232730	+	--	--	K12135 zinc finger protein CONSTANS | (RefSeq) CO; B-box type zinc finger protein with CCT domain-containing protein (A)	CONSTANS-like protein [Ipomoea nil]	RecName: Full=Zinc finger protein CONSTANS-LIKE 2;	SubName: Full=CONSTANS-like protein {ECO:0000313|EMBL:AAG24863.1};	GATA-4/5/6 transcription factors	GO:0005634,nucleus; GO:0003677,DNA binding; GO:0003700,DNA-binding transcription factor activity; GO:0008270,zinc ion binding; GO:0009658,chloroplast organization; GO:0009909,regulation of flower development; GO:0009416,response to light stimulus; GO:0006351,transcription, DNA-templated	Cytoplasmic polyadenylation element-binding protein ZZ domain
g12194	HB-HD-ZIP	TF	HB->HB-HD-ZIP	692	1396	1.014	up	LG3	20419379	20422330	-	--	--	K09338 homeobox-leucine zipper protein | (RefSeq) ATHB13; Homeobox-leucine zipper protein family (A)	PREDICTED: homeobox-leucine zipper protein ATHB-13-like [Ipomoea nil]	RecName: Full=Homeobox-leucine zipper protein ATHB-13; AltName: Full=HD-ZIP protein ATHB-13; AltName: Full=Homeodomain transcription factor ATHB-13;	SubName: Full=Homeobox protein, putative {ECO:0000313|EMBL:EEF42166.1};	Transcription factor HEX, contains HOX and HALZ domains	GO:0005634,nucleus; GO:0003700,DNA-binding transcription factor activity; GO:0043565,sequence-specific DNA binding; GO:0048826,cotyledon morphogenesis; GO:0009965,leaf morphogenesis; GO:0080022,primary root development; GO:0009744,response to sucrose; GO:0006351,transcription, DNA-templated	Protein of unknown function (DUF1635)
g12244	C2C2-Dof	TF	C2C2->C2C2-Dof	1491	280	-2.414	down	LG3	20805836	20809283	+	--	--	K16222 Dof zinc finger protein DOF5.5 | (RefSeq) CDF1; cycling DOF factor 1 (A)	PREDICTED: cyclic dof factor 1-like [Ipomoea nil]	RecName: Full=Cyclic dof factor 2; AltName: Full=Dof zinc finger protein DOF5.2; Short=AtDOF5.2;	SubName: Full=cyclic dof factor 1-like {ECO:0000313|RefSeq:XP_016481458.1};	--	GO:0005634,nucleus; GO:0003700,DNA-binding transcription factor activity; GO:0046872,metal ion binding; GO:0043565,sequence-specific DNA binding; GO:0009908,flower development; GO:0006355,regulation of transcription, DNA-templated; GO:0006351,transcription, DNA-templated	Dof domain, zinc finger
g12272	bHLH	TF	bHLH	184	82	-1.177	down	LG3	21004378	21012899	+	--	--	K12126 phytochrome-interacting factor 3 | (RefSeq) PIF3; phytochrome interacting factor 3 (A)	PREDICTED: transcription factor bHLH76-like isoform X1 [Ipomoea nil]	RecName: Full=Transcription factor bHLH49; AltName: Full=Basic helix-loop-helix protein 49; Short=AtbHLH49; Short=bHLH 49; AltName: Full=Protein ACTIVATOR FOR CELL ELONGATION 1; AltName: Full=Transcription factor EN 82; AltName: Full=bHLH transcription factor bHLH049;	SubName: Full=Uncharacterized protein {ECO:0000313|EMBL:CCB51156.1};	--	GO:0005634,nucleus; GO:0003700,DNA-binding transcription factor activity; GO:0046983,protein dimerization activity; GO:0043565,sequence-specific DNA binding; GO:0040008,regulation of growth; GO:0006355,regulation of transcription, DNA-templated; GO:0006351,transcription, DNA-templated	Helix-loop-helix DNA-binding domain
g12377	AP2/ERF-RAV	TF	AP2/ERF->AP2/ERF-RAV	2896	99	-4.869	down	LG3	21872060	21873352	+	--	--	K09287 RAV-like factor | (RefSeq) RAV2; related to ABI3/VP1 2 (A)	PREDICTED: AP2/ERF and B3 domain-containing transcription factor RAV1-like [Ipomoea nil]	RecName: Full=AP2/ERF and B3 domain-containing transcription repressor RAV2; AltName: Full=Ethylene-responsive transcription factor RAV2; AltName: Full=Protein RELATED TO ABI3/VP1 2; AltName: Full=Protein RELATED TO APETALA2 8; AltName: Full=Protein TEMPRANILLO 2;	SubName: Full=Uncharacterized protein {ECO:0000313|EMBL:PIN09498.1};	--	GO:0005634,nucleus; GO:0003700,DNA-binding transcription factor activity; GO:0043565,sequence-specific DNA binding; GO:0009873,ethylene-activated signaling pathway; GO:0045892,negative regulation of transcription, DNA-templated; GO:0006351,transcription, DNA-templated	AP2 domain
g12473	C2C2-CO-like	TF	C2C2->C2C2-CO-like	303	25	-3.581	down	LG3	22653506	22656042	+	--	--	K12135 zinc finger protein CONSTANS | (RefSeq) CO; B-box type zinc finger protein with CCT domain-containing protein (A)	PREDICTED: zinc finger protein CONSTANS-LIKE 16-like [Ipomoea nil]	RecName: Full=Zinc finger protein CONSTANS-LIKE 16;	SubName: Full=zinc finger protein CONSTANS-LIKE 16-like {ECO:0000313|RefSeq:XP_016463604.1};	GATA-4/5/6 transcription factors	GO:0016020,membrane; GO:0005634,nucleus; GO:0003700,DNA-binding transcription factor activity; GO:0008270,zinc ion binding; GO:0006355,regulation of transcription, DNA-templated	B-box zinc finger
g12475	LOB	TF	LOB	23	2	-3.502	down	LG3	22684760	22686086	-	--	--	K13944 LOB domain-containing protein 16 | (RefSeq) LBD16; lateral organ boundaries-domain 16 (A)	PREDICTED: LOB domain-containing protein 40-like [Ipomoea nil]	RecName: Full=LOB domain-containing protein 41; AltName: Full=ASYMMETRIC LEAVES 2-like protein 38; Short=AS2-like protein 38;	SubName: Full=Uncharacterized protein {ECO:0000313|EMBL:CDP00620.1};	--	GO:0006355,regulation of transcription, DNA-templated	Lateral organ boundaries (LOB) domain
g12832	AP2/ERF-RAV	TF	AP2/ERF->AP2/ERF-RAV	7871	14	-9.082	down	LG4	402970	404648	+	--	--	K09287 RAV-like factor | (RefSeq) RAV2; related to ABI3/VP1 2 (A)	PREDICTED: AP2/ERF and B3 domain-containing transcription factor RAV1-like [Ipomoea nil]	RecName: Full=AP2/ERF and B3 domain-containing transcription repressor RAV2; AltName: Full=Ethylene-responsive transcription factor RAV2; AltName: Full=Protein RELATED TO ABI3/VP1 2; AltName: Full=Protein RELATED TO APETALA2 8; AltName: Full=Protein TEMPRANILLO 2;	SubName: Full=Tempranillo {ECO:0000313|EMBL:AGS83386.1};	--	GO:0005634,nucleus; GO:0003700,DNA-binding transcription factor activity; GO:0043565,sequence-specific DNA binding; GO:0009873,ethylene-activated signaling pathway; GO:0045892,negative regulation of transcription, DNA-templated; GO:0006351,transcription, DNA-templated	AP2 domain
g1288	AP2/ERF-ERF	TF	AP2/ERF->AP2/ERF-ERF	22	66	1.585	up	LG1	7705023	7706464	-	--	--	--	PREDICTED: uncharacterized protein LOC109188952 [Ipomoea nil]	--	SubName: Full=ethylene-responsive transcription factor RAP2-11-like {ECO:0000313|RefSeq:XP_016488545.1};	--	GO:0005634,nucleus; GO:0003677,DNA binding; GO:0003700,DNA-binding transcription factor activity; GO:0006351,transcription, DNA-templated	AP2 domain
g12897	bZIP	TF	bZIP	1035	288	-1.847	down	LG4	826720	827649	+	--	--	K09060 plant G-box-binding factor | (RefSeq) bZIP68; basic region/leucine zipper transcription factor 68 (A)	PREDICTED: basic leucine zipper 43-like [Ipomoea nil]	RecName: Full=Basic leucine zipper 43 {ECO:0000303|PubMed:11906833}; Short=AtbZIP43 {ECO:0000303|PubMed:11906833}; Short=bZIP protein 43 {ECO:0000303|PubMed:11906833};	SubName: Full=Uncharacterized protein {ECO:0000313|EnsemblPlants:PGSC0003DMT400019465};	--	GO:0005634,nucleus; GO:0003677,DNA binding; GO:0003700,DNA-binding transcription factor activity; GO:0006351,transcription, DNA-templated	bZIP Maf transcription factor
g13053	SBP	TF	SBP	272	595	1.127	up	LG4	1987008	1990526	+	--	--	--	PREDICTED: squamosa promoter-binding-like protein 6 [Ipomoea nil]	RecName: Full=Squamosa promoter-binding-like protein 6;	SubName: Full=Squamosa promoter-binding-like protein 18 {ECO:0000313|EMBL:PHT33665.1};	--	GO:0005634,nucleus; GO:0003677,DNA binding; GO:0003700,DNA-binding transcription factor activity; GO:0046872,metal ion binding; GO:0042742,defense response to bacterium; GO:0010468,regulation of gene expression; GO:0006355,regulation of transcription, DNA-templated; GO:0006351,transcription, DNA-templated	SBP domain
g13125	MYB	TF	MYB->MYB	90	33	-1.451	down	LG4	2425707	2431049	-	--	--	K09422 transcription factor MYB, plant | (RefSeq) MYB15; myb domain protein 15 (A)	R2R3-MYB protein [Rehmannia glutinosa]	RecName: Full=Transcription factor MYB15 {ECO:0000305}; AltName: Full=Myb-related protein 15 {ECO:0000305}; Short=AtMYB15 {ECO:0000312|EMBL:CAA74603.1}; AltName: Full=Myb-related protein Y19 {ECO:0000305}; Short=AtY19 {ECO:0000303|PubMed:8980549};	SubName: Full=R2R3-MYB protein {ECO:0000313|EMBL:AKV71950.1};	Transcription factor, Myb superfamily	GO:0005634,nucleus; GO:0003700,DNA-binding transcription factor activity; GO:0000981,DNA-binding transcription factor activity, RNA polymerase II-specific; GO:0043565,sequence-specific DNA binding; GO:0001135,RNA polymerase II transcription regulator recruiting activity; GO:0044212,transcription regulatory region DNA binding; GO:0030154,cell differentiation; GO:0006357,regulation of transcription…	SLIDE
g13132	AP2/ERF-ERF	TF	AP2/ERF->AP2/ERF-ERF	2810	4	-9.546	down	LG4	2474885	2476112	-	--	--	K14516 ethylene-responsive transcription factor 1 | (RefSeq) ERF1; ethylene response factor 1 (A)	PREDICTED: ethylene-responsive transcription factor 1B-like [Ipomoea nil]	RecName: Full=Ethylene-responsive transcription factor 1B; Short=AtERF1B; AltName: Full=Ethylene-responsive element-binding factor 1B; Short=EREBP-1B;	SubName: Full=Ethylene-responsive transcription factor 1B {ECO:0000313|EMBL:APZ87851.1}; Flags: Fragment;	--	GO:0005634,nucleus; GO:0003677,DNA binding; GO:0003700,DNA-binding transcription factor activity; GO:0006952,defense response; GO:0009873,ethylene-activated signaling pathway; GO:0009867,jasmonic acid mediated signaling pathway; GO:0006351,transcription, DNA-templated	AP2 domain
g13143	Others	TR	Others	396	144	-1.456	down	LG4	2542078	2543372	-	--	--	K14509 ethylene receptor [EC:2.7.13.-] | (RefSeq) EIN4; Signal transduction histidine kinase, hybrid-type, ethylene sensor (A)	PREDICTED: protein EIN4-like [Ipomoea nil]	RecName: Full=Protein EIN4; Short=AtEIN4; EC=2.7.11.-; AltName: Full=Protein ETHYLENE INSENSITIVE 4;	RecName: Full=Ethylene receptor {ECO:0000256|PIRNR:PIRNR026389};	Sensory transduction histidine kinase	GO:0005783,endoplasmic reticulum; GO:0005789,endoplasmic reticulum membrane; GO:0016021,integral component of membrane; GO:0005524,ATP binding; GO:0051740,ethylene binding; GO:0038199,ethylene receptor activity; GO:0046872,metal ion binding; GO:0000155,phosphorelay sensor kinase activity; GO:0004674,protein serine/threonine kinase activity; GO:0004872,NA; GO:0010105,negative regulation of ethylen…	Histidine kinase-, DNA gyrase B-, and HSP90-like ATPase
g13146	Others	TR	Others	3961	1557	-1.347	down	LG4	2572044	2578242	-	--	--	K14509 ethylene receptor [EC:2.7.13.-] | (RefSeq) EIN4; Signal transduction histidine kinase, hybrid-type, ethylene sensor (A)	PREDICTED: protein EIN4-like [Ipomoea nil]	RecName: Full=Protein EIN4; Short=AtEIN4; EC=2.7.11.-; AltName: Full=Protein ETHYLENE INSENSITIVE 4;	RecName: Full=Ethylene receptor {ECO:0000256|PIRNR:PIRNR026389};	Sensory transduction histidine kinase	GO:0005783,endoplasmic reticulum; GO:0005789,endoplasmic reticulum membrane; GO:0016021,integral component of membrane; GO:0005524,ATP binding; GO:0051740,ethylene binding; GO:0038199,ethylene receptor activity; GO:0046872,metal ion binding; GO:0000155,phosphorelay sensor kinase activity; GO:0004674,protein serine/threonine kinase activity; GO:0004872,NA; GO:0010105,negative regulation of ethylen…	His Kinase A (phospho-acceptor) domain
g13174	AUX/IAA	TR	AUX/IAA	86	3	-4.66	down	LG4	2739814	2742554	-	--	--	K14484 auxin-responsive protein IAA | (RefSeq) IAA14; indole-3-acetic acid inducible 14 (A)	PREDICTED: auxin-responsive protein IAA14-like isoform X2 [Ipomoea nil]	RecName: Full=Auxin-responsive protein IAA14; AltName: Full=Indoleacetic acid-induced protein 14; AltName: Full=Protein SOLITARY ROOT;	RecName: Full=Auxin-responsive protein {ECO:0000256|RuleBase:RU004549};	--	GO:0005634,nucleus; GO:0003700,DNA-binding transcription factor activity; GO:0009734,auxin-activated signaling pathway; GO:0010102,lateral root morphogenesis; GO:0045892,negative regulation of transcription, DNA-templated; GO:0009733,response to auxin; GO:0006351,transcription, DNA-templated	AUX/IAA family
g13217	AUX/IAA	TR	AUX/IAA	78	14	-2.483	down	LG4	3025485	3028187	-	--	--	K14484 auxin-responsive protein IAA | (RefSeq) IAA14; indole-3-acetic acid inducible 14 (A)	PREDICTED: auxin-responsive protein IAA14-like isoform X2 [Ipomoea nil]	RecName: Full=Auxin-responsive protein IAA14; AltName: Full=Indoleacetic acid-induced protein 14; AltName: Full=Protein SOLITARY ROOT;	RecName: Full=Auxin-responsive protein {ECO:0000256|RuleBase:RU004549};	--	GO:0005634,nucleus; GO:0003700,DNA-binding transcription factor activity; GO:0009734,auxin-activated signaling pathway; GO:0010102,lateral root morphogenesis; GO:0045892,negative regulation of transcription, DNA-templated; GO:0009733,response to auxin; GO:0006351,transcription, DNA-templated	AUX/IAA family
g13218	AUX/IAA	TR	AUX/IAA	1952	972	-1.006	down	LG4	3046682	3049178	+	--	--	K14484 auxin-responsive protein IAA | (RefSeq) ATAUX2-11; AUX/IAA transcriptional regulator family protein (A)	PREDICTED: auxin-responsive protein IAA4-like [Ipomoea nil]	RecName: Full=Auxin-induced protein 22B; AltName: Full=Indole-3-acetic acid-induced protein ARG4;	RecName: Full=Auxin-responsive protein {ECO:0000256|RuleBase:RU004549};	--	GO:0005634,nucleus; GO:0009734,auxin-activated signaling pathway; GO:0006355,regulation of transcription, DNA-templated; GO:0006351,transcription, DNA-templated	AUX/IAA family
g13267	HSF	TF	HSF	230	42	-2.443	down	LG4	3346965	3349699	-	--	--	K09419 heat shock transcription factor, other eukaryote | (RefSeq) HSFA6B; heat shock transcription factor A6B (A)	--	RecName: Full=Heat stress transcription factor A-6b; Short=AtHsfA6b; AltName: Full=AtHsf-07;	SubName: Full=heat stress transcription factor A-6b-like isoform X1 {ECO:0000313|RefSeq:XP_016486569.1};	Heat shock transcription factor	GO:0005737,cytoplasm; GO:0005634,nucleus; GO:0003700,DNA-binding transcription factor activity; GO:0043565,sequence-specific DNA binding; GO:0006351,transcription, DNA-templated	HSF-type DNA-binding
g13276	CPP	TF	CPP	183	87	-1.069	down	LG4	3418478	3429389	-	--	--	--	--	RecName: Full=Protein tesmin/TSO1-like CXC 2; Short=AtTCX2; AltName: Full=Protein TSO1-like 2; Short=Protein SOL2;	SubName: Full=protein tesmin/TSO1-like CXC 2 isoform X2 {ECO:0000313|RefSeq:XP_009770245.1};	Metallothionein-like protein	GO:0005634,nucleus; GO:0003700,DNA-binding transcription factor activity; GO:0046872,metal ion binding; GO:0043565,sequence-specific DNA binding; GO:0007275,multicellular organism development; GO:0006355,regulation of transcription, DNA-templated	Tesmin/TSO1-like CXC domain, cysteine-rich domain
g13385	TUB	TF	TUB	1666	453	-1.878	down	LG4	4084454	4086200	+	--	--	--	--	RecName: Full=Tubby-like F-box protein 6; Short=OsTLP6; AltName: Full=Tubby-like F-box protein 14; Short=OsTLP14;	--	Tub family proteins	GO:0035091,phosphatidylinositol binding	Tub family
g13503	WRKY	TF	WRKY	54	16	-1.709	down	LG4	4795188	4797476	+	--	--	K18835 WRKY transcription factor 2 | (RefSeq) WRKY2; WRKY DNA-binding protein 2 (A)	--	RecName: Full=Probable WRKY transcription factor 23; AltName: Full=WRKY DNA-binding protein 23;	--	--	GO:0005634,nucleus; GO:0003700,DNA-binding transcription factor activity; GO:0043565,sequence-specific DNA binding; GO:0009733,response to auxin; GO:0009624,response to nematode; GO:0006351,transcription, DNA-templated	WRKY DNA -binding domain
g13520	MYB	TF	MYB->MYB	142	10	-3.809	down	LG4	4920537	4922195	-	--	--	K09422 transcription factor MYB, plant | (RefSeq) MYB108; myb domain protein 108 (A)	--	RecName: Full=Transcription factor MYB108; AltName: Full=Myb-related protein 108; Short=AtMYB108; AltName: Full=Protein BOTRYTIS-SUSCEPTIBLE 1;	--	Transcription factor, Myb superfamily	GO:0005634,nucleus; GO:0003700,DNA-binding transcription factor activity; GO:0000981,DNA-binding transcription factor activity, RNA polymerase II-specific; GO:0043565,sequence-specific DNA binding; GO:0001135,RNA polymerase II transcription regulator recruiting activity; GO:0044212,transcription regulatory region DNA binding; GO:0030154,cell differentiation; GO:0006952,defense response; GO:000635…	Myb-like DNA-binding domain
g13567	SBP	TF	SBP	73	175	1.266	up	LG4	5277025	5281566	-	--	--	--	--	RecName: Full=Squamosa promoter-binding-like protein 12;	--	--	GO:0005634,nucleus; GO:0003677,DNA binding; GO:0046872,metal ion binding; GO:0006355,regulation of transcription, DNA-templated; GO:0006351,transcription, DNA-templated	SBP domain
g13581	SBP	TF	SBP	192	449	1.231	up	LG4	5354399	5355975	-	--	--	--	--	RecName: Full=Squamosa promoter-binding-like protein 13B;	--	--	GO:0005634,nucleus; GO:0003677,DNA binding; GO:0046872,metal ion binding; GO:0048653,anther development; GO:0006355,regulation of transcription, DNA-templated; GO:0006351,transcription, DNA-templated	SBP domain
g13583	WRKY	TF	WRKY	108	15	-2.875	down	LG4	5371936	5373675	-	--	--	K13423 WRKY transcription factor 25 | (RefSeq) WRKY25; WRKY DNA-binding protein 25 (A)	--	RecName: Full=Probable WRKY transcription factor 75; AltName: Full=WRKY DNA-binding protein 75;	--	--	GO:0005634,nucleus; GO:0003700,DNA-binding transcription factor activity; GO:0000978,RNA polymerase II proximal promoter sequence-specific DNA binding; GO:0044212,transcription regulatory region DNA binding; GO:0010055,atrichoblast differentiation; GO:0048527,lateral root development; GO:0000122,negative regulation of transcription by RNA polymerase II; GO:0043620,regulation of DNA-templated tran…	WRKY DNA -binding domain
g13640	Tify	TF	Tify	1307	33	-5.289	down	LG4	5809948	5813111	+	--	--	K13464 jasmonate ZIM domain-containing protein | (RefSeq) JAZ10; jasmonate-zim-domain protein 10 (A)	--	RecName: Full=Protein TIFY 9; AltName: Full=Jasmonate ZIM domain-containing protein 10; AltName: Full=Protein JASMONATE-ASSOCIATED 1; AltName: Full=Protein JAZ10;	--	--	GO:0005634,nucleus; GO:0042803,protein homodimerization activity; GO:0003714,transcription corepressor activity; GO:0006952,defense response; GO:1903507,negative regulation of nucleic acid-templated transcription; GO:2000022,regulation of jasmonic acid mediated signaling pathway; GO:0010112,regulation of systemic acquired resistance; GO:0006355,regulation of transcription, DNA-templated; GO:00097…	tify domain
g13657	AP2/ERF-ERF	TF	AP2/ERF->AP2/ERF-ERF	219	35	-2.667	down	LG4	5978987	5981987	+	--	--	K09286 EREBP-like factor | (RefSeq) RAP2.6; related to AP2 6 (A)	--	RecName: Full=Ethylene-responsive transcription factor ERF114 {ECO:0000303|PubMed:16407444}; AltName: Full=ERF bud enhancer {ECO:0000303|PubMed:23616605};	--	--	GO:0005634,nucleus; GO:0003700,DNA-binding transcription factor activity; GO:0043565,sequence-specific DNA binding; GO:0050832,defense response to fungus; GO:0009873,ethylene-activated signaling pathway; GO:0007275,multicellular organism development; GO:0006351,transcription, DNA-templated	AP2 domain
g13822	AP2/ERF-ERF	TF	AP2/ERF->AP2/ERF-ERF	7	101	3.779	up	LG4	7284088	7284967	+	--	--	K09286 EREBP-like factor | (RefSeq) RAP2.10; related to AP2 10 (A)	PREDICTED: ethylene-responsive transcription factor ERF014-like [Ipomoea nil]	RecName: Full=Ethylene-responsive transcription factor ERF012; AltName: Full=Dehydration response element-binding protein 26 {ECO:0000303|PubMed:21069430};	SubName: Full=ethylene-responsive transcription factor ERF014-like {ECO:0000313|RefSeq:XP_009781193.1};	--	GO:0005634,nucleus; GO:0003700,DNA-binding transcription factor activity; GO:0043565,sequence-specific DNA binding; GO:0044212,transcription regulatory region DNA binding; GO:0071497,cellular response to freezing; GO:0034605,cellular response to heat; GO:0009873,ethylene-activated signaling pathway; GO:0045893,positive regulation of transcription, DNA-templated; GO:0009753,response to jasmonic ac…	--
g13827	C2H2	TF	C2H2	837	330	-1.343	down	LG4	7346388	7348350	-	--	--	--	PREDICTED: uncharacterized protein LOC109175997 [Ipomoea nil]	--	SubName: Full=Putative nucleic acid binding protein {ECO:0000313|EMBL:OMO49834.1};	--	GO:0003676,nucleic acid binding	--
g13867	AUX/IAA	TR	AUX/IAA	3503	1146	-1.613	down	LG4	7684448	7687687	+	--	--	K14484 auxin-responsive protein IAA | (RefSeq) IAA14; indole-3-acetic acid inducible 14 (A)	PREDICTED: auxin-responsive protein IAA14-like [Ipomoea nil]	RecName: Full=Auxin-responsive protein IAA14; AltName: Full=Indoleacetic acid-induced protein 14; AltName: Full=Protein SOLITARY ROOT;	RecName: Full=Auxin-responsive protein {ECO:0000256|RuleBase:RU004549};	--	GO:0005634,nucleus; GO:0003700,DNA-binding transcription factor activity; GO:0009734,auxin-activated signaling pathway; GO:0010102,lateral root morphogenesis; GO:0045892,negative regulation of transcription, DNA-templated; GO:0009733,response to auxin; GO:0006351,transcription, DNA-templated	AUX/IAA family
g13906	SNF2	TR	SNF2	143	46	-1.629	down	LG4	7980856	7987447	-	--	--	K15505 DNA repair protein RAD5 [EC:3.6.4.-] | (RefSeq) Helicase protein with RING/U-box domain-containing protein (A)	PREDICTED: putative SWI/SNF-related matrix-associated actin-dependent regulator of chromatin subfamily A member 3-like 3 isoform X1 [Ipomoea nil]	RecName: Full=DNA repair protein RAD5B {ECO:0000305}; EC=3.6.4.- {ECO:0000305}; AltName: Full=Putative SWI/SNF-related matrix-associated actin-dependent regulator of chromatin subfamily A member 3-like 3 {ECO:0000305}; Short=SMARCA3-like protein 3 {ECO:0000305}; AltName: Full=RAD5 homolog B {ECO:0000303|PubMed:18310306}; Short=AtRAD5B {ECO:0000303|PubMed:18310306};	SubName: Full=putative SWI/SNF-related matrix-associated actin-dependent regulator of chromatin subfamily A member 3-like 3 {ECO:0000313|RefSeq:XP_016462752.1};	Helicase-like transcription factor HLTF/DNA helicase RAD5, DEAD-box superfamily	GO:0009941,chloroplast envelope; GO:0005634,nucleus; GO:0005524,ATP binding; GO:0004386,helicase activity; GO:0003676,nucleic acid binding; GO:0008270,zinc ion binding; GO:0016569,covalent chromatin modification; GO:0006281,DNA repair	Anaphase-promoting complex subunit 11 RING-H2 finger
g13922	AP2/ERF-ERF	TF	AP2/ERF->AP2/ERF-ERF	1769	29	-5.947	down	LG4	8095279	8096094	+	--	--	K14516 ethylene-responsive transcription factor 1 | (RefSeq) ERF1; ethylene response factor 1 (A)	PREDICTED: ethylene-responsive transcription factor 1B-like [Ipomoea nil]	RecName: Full=Ethylene-responsive transcription factor 1B; Short=AtERF1B; AltName: Full=Ethylene-responsive element-binding factor 1B; Short=EREBP-1B;	SubName: Full=Uncharacterized protein {ECO:0000313|EMBL:KJB28453.1};	--	GO:0005634,nucleus; GO:0003677,DNA binding; GO:0003700,DNA-binding transcription factor activity; GO:0006952,defense response; GO:0009873,ethylene-activated signaling pathway; GO:0009867,jasmonic acid mediated signaling pathway; GO:0006351,transcription, DNA-templated	AP2 domain
g1398	LOB	TF	LOB	14950	6	-11.247	down	LG1	8494464	8496120	-	--	--	K13944 LOB domain-containing protein 16 | (RefSeq) LBD16; lateral organ boundaries-domain 16 (A)	PREDICTED: LOB domain-containing protein 41-like [Ipomoea nil]	RecName: Full=LOB domain-containing protein 41; AltName: Full=ASYMMETRIC LEAVES 2-like protein 38; Short=AS2-like protein 38;	SubName: Full=Lateral organ boundaries domain-containing protein {ECO:0000313|EMBL:KVI00113.1};	--	GO:0006355,regulation of transcription, DNA-templated	Lateral organ boundaries (LOB) domain
g14524	bHLH	TF	bHLH	1435	451	-1.672	down	LG4	12898706	12903856	+	--	--	K13422 transcription factor MYC2 | (RefSeq) MYC2; Basic helix-loop-helix (bHLH) DNA-binding family protein (A)	PREDICTED: transcription factor bHLH35-like [Ipomoea nil]	RecName: Full=Transcription factor bHLH35; AltName: Full=Basic helix-loop-helix protein 35; Short=AtbHLH35; Short=bHLH 35; AltName: Full=Transcription factor EN 41; AltName: Full=bHLH transcription factor bHLH035;	SubName: Full=transcription factor bHLH35-like isoform X2 {ECO:0000313|RefSeq:XP_016449593.1};	--	GO:0005634,nucleus; GO:0003677,DNA binding; GO:0046983,protein dimerization activity; GO:0006355,regulation of transcription, DNA-templated; GO:0006351,transcription, DNA-templated	Helix-loop-helix DNA-binding domain
g14717	PLATZ	TF	PLATZ	2427	1096	-1.147	down	LG4	14387178	14388566	-	--	--	--	PREDICTED: uncharacterized protein LOC109185284, partial [Ipomoea nil]	--	SubName: Full=Uncharacterized protein {ECO:0000313|EMBL:BAT99634.1};	--	--	PLATZ transcription factor
g14886	AP2/ERF-ERF	TF	AP2/ERF->AP2/ERF-ERF	21	57	1.461	up	LG4	15886106	15887314	-	--	--	K09286 EREBP-like factor | (RefSeq) ERF5; ethylene responsive element binding factor 5 (A)	ERF6 [Ipomoea batatas]	RecName: Full=Ethylene-responsive transcription factor 5; Short=AtERF5; AltName: Full=Ethylene-responsive element-binding factor 5; Short=EREBP-5;	SubName: Full=ERF6 {ECO:0000313|EMBL:AMS25576.1};	--	GO:0005634,nucleus; GO:0003700,DNA-binding transcription factor activity; GO:0043565,sequence-specific DNA binding; GO:0006952,defense response; GO:0009873,ethylene-activated signaling pathway; GO:0010200,response to chitin; GO:0009409,response to cold; GO:0006351,transcription, DNA-templated	AP2 domain
g15212	GARP-G2-like	TF	GARP->GARP-G2-like	453	213	-1.088	down	LG4	18158786	18165741	+	--	--	K14491 two-component response regulator ARR-B family | (RefSeq) RR18; response regulator 18 (A)	--	RecName: Full=Two-component response regulator-like APRR2; AltName: Full=Pseudo-response regulator 2; AltName: Full=TOC2 protein;	SubName: Full=Two-component response regulator-like aprr2 {ECO:0000313|EMBL:OIT21442.1};	GATA-4/5/6 transcription factors	GO:0005634,nucleus; GO:0003677,DNA binding; GO:0003700,DNA-binding transcription factor activity; GO:0000160,phosphorelay signal transduction system; GO:0006351,transcription, DNA-templated	Response regulator receiver domain
g16110	HSF	TF	HSF	101	918	3.182	up	LG4	25431614	25433112	+	--	--	K09419 heat shock transcription factor, other eukaryote | (RefSeq) HSFC1; heat shock transcription factor C1 (A)	PREDICTED: heat stress transcription factor C-1-like [Ipomoea nil]	RecName: Full=Heat stress transcription factor C-1; Short=AtHsfC1; AltName: Full=AtHsf-08;	SubName: Full=heat stress transcription factor C-1 {ECO:0000313|RefSeq:XP_009770587.1};	Heat shock transcription factor	GO:0005634,nucleus; GO:0003700,DNA-binding transcription factor activity; GO:0043565,sequence-specific DNA binding; GO:0006351,transcription, DNA-templated	HSF-type DNA-binding
g16681	bHLH	TF	bHLH	2203	4740	1.105	up	LG5	533513	535859	+	--	--	K13422 transcription factor MYC2 | (RefSeq) MYC2; Basic helix-loop-helix (bHLH) DNA-binding family protein (A)	PREDICTED: transcription factor bHLH35-like [Ipomoea nil]	RecName: Full=Transcription factor bHLH35; AltName: Full=Basic helix-loop-helix protein 35; Short=AtbHLH35; Short=bHLH 35; AltName: Full=Transcription factor EN 41; AltName: Full=bHLH transcription factor bHLH035;	SubName: Full=transcription factor bHLH35-like isoform X2 {ECO:0000313|RefSeq:XP_009760781.1};	--	GO:0005634,nucleus; GO:0003677,DNA binding; GO:0046983,protein dimerization activity; GO:0006355,regulation of transcription, DNA-templated; GO:0006351,transcription, DNA-templated	Helix-loop-helix DNA-binding domain
g16698	NAC	TF	NAC	695	284	-1.291	down	LG5	664823	668946	+	--	--	--	PREDICTED: NAC domain-containing protein 18-like [Ipomoea nil]	RecName: Full=NAC transcription factor NAM-B1; Short=TtNAM-B1;	SubName: Full=NAC domain transcriptional regulator superfamily protein, putative {ECO:0000313|EMBL:EOY32709.1};	--	GO:0005634,nucleus; GO:0003677,DNA binding; GO:0006355,regulation of transcription, DNA-templated; GO:0006351,transcription, DNA-templated	Nop14-like family
g16785	HB-HD-ZIP	TF	HB->HB-HD-ZIP	2533	9555	1.915	up	LG5	1140172	1143369	-	--	--	K09338 homeobox-leucine zipper protein | (RefSeq) HB16; homeobox protein 16 (A)	PREDICTED: homeobox-leucine zipper protein ATHB-16-like [Ipomoea nil]	RecName: Full=Homeobox-leucine zipper protein ATHB-5; AltName: Full=HD-ZIP protein ATHB-5; AltName: Full=Homeodomain transcription factor ATHB-5;	SubName: Full=Uncharacterized protein {ECO:0000313|EMBL:EEE93287.2};	Transcription factor HEX, contains HOX and HALZ domains	GO:0005634,nucleus; GO:0003700,DNA-binding transcription factor activity; GO:0042803,protein homodimerization activity; GO:0043565,sequence-specific DNA binding; GO:0009738,abscisic acid-activated signaling pathway; GO:0045893,positive regulation of transcription, DNA-templated; GO:0009737,response to abscisic acid; GO:0006351,transcription, DNA-templated	CASP C terminal
g17062	HB-other	TF	HB->HB-other	666	81	-3.041	down	LG5	2768037	2770022	-	--	--	K09338 homeobox-leucine zipper protein | (RefSeq) HB40; homeobox protein 40 (A)	--	RecName: Full=Homeobox-leucine zipper protein ATHB-40; AltName: Full=HD-ZIP protein ATHB-40; AltName: Full=Homeodomain transcription factor ATHB-40;	--	Transcription factor HEX, contains HOX and HALZ domains	GO:0005634,nucleus; GO:0003700,DNA-binding transcription factor activity; GO:0043565,sequence-specific DNA binding; GO:0009733,response to auxin; GO:0006351,transcription, DNA-templated	Homeobox associated leucine zipper
g17144	bHLH	TF	bHLH	42	7	-2.703	down	LG5	3356558	3359116	+	--	--	--	--	RecName: Full=Transcription factor bHLH93; AltName: Full=Basic helix-loop-helix protein 93; Short=AtbHLH93; Short=bHLH 93; AltName: Full=Transcription factor EN 47; AltName: Full=bHLH transcription factor bHLH093;	--	--	GO:0005634,nucleus; GO:0003677,DNA binding; GO:0003700,DNA-binding transcription factor activity; GO:0046983,protein dimerization activity; GO:0045487,gibberellin catabolic process; GO:0007275,multicellular organism development; GO:0010371,regulation of gibberellin biosynthetic process; GO:0006351,transcription, DNA-templated	Helix-loop-helix DNA-binding domain
g17272	TCP	TF	TCP	12	1	-4.147	down	LG5	4311238	4313185	+	--	--	--	--	RecName: Full=Transcription factor CYCLOIDEA; Flags: Fragment;	--	--	GO:0005634,nucleus; GO:0003677,DNA binding; GO:0007275,multicellular organism development; GO:0006355,regulation of transcription, DNA-templated; GO:0006351,transcription, DNA-templated	TCP family transcription factor
g17892	GRAS	TF	GRAS	91	242	1.415	up	LG5	8879911	8883621	+	--	--	K14494 DELLA protein | (RefSeq) RGL2; RGA-like 2 (A)	PREDICTED: scarecrow-like protein 9 [Ipomoea nil]	RecName: Full=Scarecrow-like protein 9; Short=AtSCL9; AltName: Full=GRAS family protein 13; Short=AtGRAS-13;	SubName: Full=scarecrow-like protein 9 {ECO:0000313|RefSeq:XP_009758867.1};	--	GO:0005634,nucleus; GO:0003700,DNA-binding transcription factor activity; GO:0043565,sequence-specific DNA binding; GO:0006355,regulation of transcription, DNA-templated; GO:0006351,transcription, DNA-templated	GRAS domain family
g18302	WRKY	TF	WRKY	19	50	1.371	up	LG5	11985355	11986956	-	--	--	K16225 probable WRKY transcription factor 52 | (RefSeq) RRS1; Disease resistance protein (TIR-NBS-LRR class) (A)	PREDICTED: probable WRKY transcription factor 70 [Ipomoea nil]	RecName: Full=Probable WRKY transcription factor 70; AltName: Full=WRKY DNA-binding protein 70;	SubName: Full=WRKY DNA-binding protein 70, putative isoform 1 {ECO:0000313|EMBL:EOY04438.1};	--	GO:0005634,nucleus; GO:0003700,DNA-binding transcription factor activity; GO:0043565,sequence-specific DNA binding; GO:0042742,defense response to bacterium; GO:0050832,defense response to fungus; GO:0009864,induced systemic resistance, jasmonic acid mediated signaling pathway; GO:1900056,negative regulation of leaf senescence; GO:0045892,negative regulation of transcription, DNA-templated; GO:00…	WRKY DNA -binding domain
g18834	OFP	TF	OFP	144	70	-1.033	down	LG5	15910131	15911021	-	--	--	--	PREDICTED: transcription repressor OFP1-like isoform X3 [Ipomoea nil]	RecName: Full=Transcription repressor OFP1; AltName: Full=Ovate family protein 1; Short=AtOFP1;	SubName: Full=Uncharacterized protein {ECO:0000313|EMBL:KYP63805.1};	--	GO:0005856,cytoskeleton; GO:0005730,nucleolus; GO:0003677,DNA binding; GO:0006281,DNA repair; GO:0045892,negative regulation of transcription, DNA-templated; GO:0051510,regulation of unidimensional cell growth; GO:0006351,transcription, DNA-templated	DNA-binding domain
g19234	B3	TF	B3->B3	9	0	-5.532	down	LG5	19073791	19079310	-	--	--	K09287 RAV-like factor | (RefSeq) RAV2; related to ABI3/VP1 2 (A)	--	RecName: Full=B3 domain-containing transcription factor NGA1; AltName: Full=Protein NGATHA 1;	SubName: Full=Uncharacterized protein {ECO:0000313|EnsemblPlants:PGSC0003DMT400031863};	--	GO:0005634,nucleus; GO:0003677,DNA binding; GO:0003700,DNA-binding transcription factor activity; GO:0009908,flower development; GO:0048366,leaf development; GO:1901371,regulation of leaf morphogenesis; GO:0006351,transcription, DNA-templated	B3 DNA binding domain
g19302	HB-HD-ZIP	TF	HB->HB-HD-ZIP	1166	2565	1.137	up	LG5	19664946	19667908	+	--	--	K09338 homeobox-leucine zipper protein | (RefSeq) HB-12; homeobox 12 (A)	--	RecName: Full=Homeobox-leucine zipper protein ATHB-7; AltName: Full=HD-ZIP protein ATHB-7; AltName: Full=Homeodomain transcription factor ATHB-7;	--	Transcription factor HEX, contains HOX and HALZ domains	GO:0005634,nucleus; GO:0003700,DNA-binding transcription factor activity; GO:0043565,sequence-specific DNA binding; GO:0045893,positive regulation of transcription, DNA-templated; GO:0009737,response to abscisic acid; GO:0009414,response to water deprivation; GO:0006351,transcription, DNA-templated	Homeobox KN domain
g19306	bHLH	TF	bHLH	364	0	-10.909	down	LG5	19761936	19765831	+	--	--	K13422 transcription factor MYC2 | (RefSeq) MYC2; Basic helix-loop-helix (bHLH) DNA-binding family protein (A)	--	RecName: Full=Transcription factor bHLH28; AltName: Full=Basic helix-loop-helix protein 28; Short=AtbHLH28; Short=bHLH 28; AltName: Full=Transcription factor EN 40; AltName: Full=bHLH transcription factor bHLH028;	--	--	GO:0005634,nucleus; GO:0005509,calcium ion binding; GO:0003677,DNA binding; GO:0003700,DNA-binding transcription factor activity; GO:0046983,protein dimerization activity; GO:0042538,hyperosmotic salinity response; GO:0006355,regulation of transcription, DNA-templated; GO:0009651,response to salt stress; GO:0006351,transcription, DNA-templated	Helix-loop-helix DNA-binding domain
g19358	HB-HD-ZIP	TF	HB->HB-HD-ZIP	615	1534	1.317	up	LG5	20187548	20188569	+	--	--	K09338 homeobox-leucine zipper protein | (RefSeq) HB-12; homeobox 12 (A)	--	RecName: Full=Homeobox-leucine zipper protein ATHB-7; AltName: Full=HD-ZIP protein ATHB-7; AltName: Full=Homeodomain transcription factor ATHB-7;	--	Transcription factor HEX, contains HOX and HALZ domains	GO:0005634,nucleus; GO:0003700,DNA-binding transcription factor activity; GO:0043565,sequence-specific DNA binding; GO:0045893,positive regulation of transcription, DNA-templated; GO:0009737,response to abscisic acid; GO:0009414,response to water deprivation; GO:0006351,transcription, DNA-templated	Homeobox KN domain
g19564	AP2/ERF-ERF	TF	AP2/ERF->AP2/ERF-ERF	70	234	1.743	up	LG5	21733516	21734814	+	--	--	K09286 EREBP-like factor | (RefSeq) RAP2.4; related to AP2 4 (A)	--	RecName: Full=Ethylene-responsive transcription factor ERF061;	--	--	GO:0005634,nucleus; GO:0003677,DNA binding; GO:0003700,DNA-binding transcription factor activity; GO:0009873,ethylene-activated signaling pathway; GO:0010200,response to chitin; GO:0006351,transcription, DNA-templated	AP2 domain
g19571	WRKY	TF	WRKY	437	172	-1.347	down	LG5	21804168	21805818	+	--	--	K16225 probable WRKY transcription factor 52 | (RefSeq) RRS1; Disease resistance protein (TIR-NBS-LRR class) (A)	--	RecName: Full=Probable WRKY transcription factor 53; AltName: Full=WRKY DNA-binding protein 53;	--	--	GO:0009507,chloroplast; GO:0005634,nucleus; GO:0003677,DNA binding; GO:0003700,DNA-binding transcription factor activity; GO:0043565,sequence-specific DNA binding; GO:0009816,defense response to bacterium, incompatible interaction; GO:0010150,leaf senescence; GO:0045893,positive regulation of transcription, DNA-templated; GO:0031347,regulation of defense response; GO:0010200,response to chitin; G…	WRKY DNA -binding domain
g19578	HMG	TR	HMG	301	105	-1.522	down	LG5	21855358	21857923	-	--	--	K09273 upstream-binding transcription factor | (RefSeq) 3xHMG-box2; HMG (high mobility group) box protein (A)	--	RecName: Full=High mobility group B protein 6; AltName: Full=Nucleosome/chromatin assembly factor group D 06; Short=Nucleosome/chromatin assembly factor group D 6; AltName: Full=WRKY transcription factor 53; Short=AtWRKY53; Short=WRKY DNA-binding protein 53;	--	HMG box-containing protein	GO:0005634,nucleus; GO:0003677,DNA binding; GO:0003700,DNA-binding transcription factor activity	CHDNT (NUC034) domain
g19589	AP2/ERF-ERF	TF	AP2/ERF->AP2/ERF-ERF	4	19	2.294	up	LG5	21934149	21945800	-	--	--	K09286 EREBP-like factor | (RefSeq) EBP; ethylene-responsive element binding protein (A)	--	RecName: Full=Ethylene-responsive transcription factor CRF2; AltName: Full=Protein CYTOKININ RESPONSE FACTOR 2;	--	--	GO:0005737,cytoplasm; GO:0005634,nucleus; GO:0003700,DNA-binding transcription factor activity; GO:0042802,identical protein binding; GO:0043565,sequence-specific DNA binding; GO:0048825,cotyledon development; GO:0009736,cytokinin-activated signaling pathway; GO:0009873,ethylene-activated signaling pathway; GO:0048364,root development; GO:0006351,transcription, DNA-templated	RFX5 DNA-binding domain
g19755	HSF	TF	HSF	866	358	-1.277	down	LG5	23307681	23309828	-	--	--	K09419 heat shock transcription factor, other eukaryote | (RefSeq) HSFA2; heat shock transcription factor A2 (A)	--	RecName: Full=Heat shock factor protein HSF30; AltName: Full=Heat shock transcription factor 30; Short=HSTF 30; AltName: Full=Heat stress transcription factor;	--	Heat shock transcription factor	GO:0005634,nucleus; GO:0003700,DNA-binding transcription factor activity; GO:0043565,sequence-specific DNA binding; GO:0006351,transcription, DNA-templated	HSF-type DNA-binding
g20475	AP2/ERF-ERF	TF	AP2/ERF->AP2/ERF-ERF	1184	370	-1.677	down	LG5	28236651	28237496	+	--	--	K09286 EREBP-like factor | (RefSeq) ERF5; ethylene responsive element binding factor 5 (A)	PREDICTED: ethylene-responsive transcription factor 5-like [Ipomoea nil]	RecName: Full=Ethylene-responsive transcription factor 5; AltName: Full=Ethylene-responsive element-binding factor 4; Short=EREBP-4; AltName: Full=Ethylene-responsive element-binding factor 5 homolog; AltName: Full=NtERF4;	SubName: Full=Ethylene-responsive-element-binding factor 12 {ECO:0000313|EMBL:ADP37427.1};	--	GO:0005634,nucleus; GO:0003677,DNA binding; GO:0003700,DNA-binding transcription factor activity; GO:0006952,defense response; GO:0009873,ethylene-activated signaling pathway; GO:0006351,transcription, DNA-templated	AP2 domain
g20476	AP2/ERF-ERF	TF	AP2/ERF->AP2/ERF-ERF	3787	98	-5.273	down	LG5	28242401	28243313	+	--	--	K09286 EREBP-like factor | (RefSeq) ERF5; ethylene responsive element binding factor 5 (A)	PREDICTED: ethylene-responsive transcription factor ERF107-like [Ipomoea nil]	RecName: Full=Ethylene-responsive transcription factor ERF106;	SubName: Full=Ethylene response factor 4 {ECO:0000313|EMBL:AAO34706.1, ECO:0000313|EnsemblPlants:Solyc05g052030.1.1};	--	GO:0005634,nucleus; GO:0003677,DNA binding; GO:0003700,DNA-binding transcription factor activity; GO:0009873,ethylene-activated signaling pathway; GO:0006351,transcription, DNA-templated	AP2 domain
g20532	bHLH	TF	bHLH	35	2	-3.939	down	LG5	28553567	28555501	+	--	--	--	PREDICTED: transcription factor bHLH36-like [Ipomoea nil]	RecName: Full=Transcription factor bHLH126; AltName: Full=Basic helix-loop-helix protein 126; Short=AtbHLH126; Short=bHLH 126; AltName: Full=Transcription factor EN 3; AltName: Full=bHLH transcription factor bHLH126;	SubName: Full=transcription factor bHLH36-like {ECO:0000313|RefSeq:XP_016489167.1, ECO:0000313|RefSeq:XP_016489168.1};	--	GO:0090575,RNA polymerase II transcription factor complex; GO:0046983,protein dimerization activity; GO:0000977,RNA polymerase II regulatory region sequence-specific DNA binding; GO:0006357,regulation of transcription by RNA polymerase II; GO:0006351,transcription, DNA-templated	Helix-loop-helix DNA-binding domain
g20630	AP2/ERF-ERF	TF	AP2/ERF->AP2/ERF-ERF	53	119	1.165	up	LG5	29221538	29223456	+	--	--	K09286 EREBP-like factor | (RefSeq) LEP; Integrase-type DNA-binding superfamily protein (A)	PREDICTED: ethylene-responsive transcription factor CRF4-like [Ipomoea nil]	RecName: Full=Ethylene-responsive transcription factor CRF4; AltName: Full=Protein CYTOKININ RESPONSE FACTOR 4;	SubName: Full=ethylene-responsive transcription factor CRF4-like {ECO:0000313|RefSeq:XP_016445500.1};	--	GO:0005737,cytoplasm; GO:0005634,nucleus; GO:0003677,DNA binding; GO:0003700,DNA-binding transcription factor activity; GO:0009736,cytokinin-activated signaling pathway; GO:0009873,ethylene-activated signaling pathway; GO:0048366,leaf development; GO:0006351,transcription, DNA-templated	AP2 domain
g20792	IWS1	TR	IWS1	239	45	-2.423	down	LG5	30126772	30129201	-	--	--	--	PREDICTED: probable mediator of RNA polymerase II transcription subunit 26c isoform X1 [Ipomoea nil]	RecName: Full=Probable mediator of RNA polymerase II transcription subunit 26c;	SubName: Full=probable mediator of RNA polymerase II transcription subunit 26c {ECO:0000313|RefSeq:XP_009786138.1};	--	GO:0005829,cytosol; GO:0070449,elongin complex; GO:0003746,translation elongation factor activity; GO:0006355,regulation of transcription, DNA-templated; GO:0006368,transcription elongation from RNA polymerase II promoter	Type IV pili methyl-accepting chemotaxis transducer N-term
g20826	NAC	TF	NAC	1861	83	-4.484	down	LG5	30291345	30293863	-	--	--	--	NAC1 [Ipomoea batatas]	RecName: Full=NAC domain-containing protein 2; Short=ANAC002;	SubName: Full=NAC1 {ECO:0000313|EMBL:ACT55332.1};	--	GO:0005634,nucleus; GO:0003677,DNA binding; GO:0003700,DNA-binding transcription factor activity; GO:0009788,negative regulation of abscisic acid-activated signaling pathway; GO:0009611,response to wounding; GO:0006351,transcription, DNA-templated	No apical meristem (NAM) protein
g21443	AUX/IAA	TR	AUX/IAA	859	370	-1.216	down	LG6	4380351	4382045	+	--	--	K14484 auxin-responsive protein IAA | (RefSeq) PAP1; phytochrome-associated protein 1 (A)	PREDICTED: auxin-responsive protein IAA26-like isoform X2 [Ipomoea nil]	RecName: Full=Auxin-responsive protein IAA26; AltName: Full=Indoleacetic acid-induced protein 26; AltName: Full=Phytochrome-associated protein 1;	RecName: Full=Auxin-responsive protein {ECO:0000256|RuleBase:RU004549};	--	GO:0005634,nucleus; GO:0003700,DNA-binding transcription factor activity; GO:0009734,auxin-activated signaling pathway; GO:0009733,response to auxin; GO:0006351,transcription, DNA-templated	AUX/IAA family
g21463	C3H	TF	C3H	5118	1395	-1.876	down	LG6	4566733	4571578	+	--	--	--	PREDICTED: zinc finger CCCH domain-containing protein 20-like [Ipomoea nil]	RecName: Full=Zinc finger CCCH domain-containing protein 20; Short=AtC3H20;	SubName: Full=Zinc finger ccch domain-containing protein 49 {ECO:0000313|EMBL:OIT25718.1};	CCCH-type Zn-finger protein	GO:0005886,plasma membrane; GO:0003677,DNA binding; GO:0003700,DNA-binding transcription factor activity; GO:0046872,metal ion binding; GO:0006355,regulation of transcription, DNA-templated; GO:0006979,response to oxidative stress	--
g21637	bZIP	TF	bZIP	970	3	-8.467	down	LG6	5998369	6001740	+	--	--	K16241 transcription factor HY5 | (RefSeq) HY5; Basic-leucine zipper (bZIP) transcription factor family protein (A)	PREDICTED: transcription factor HY5 [Ipomoea nil]	RecName: Full=Transcription factor HY5; AltName: Full=LeHY5; AltName: Full=tHY5;	SubName: Full=transcription factor HY5 isoform X2 {ECO:0000313|RefSeq:XP_009768317.1};	Transcriptional activator FOSB/c-Fos and related bZIP transcription factors	GO:0005634,nucleus; GO:0003700,DNA-binding transcription factor activity; GO:0000977,RNA polymerase II regulatory region sequence-specific DNA binding; GO:0009585,red, far-red light phototransduction; GO:0006355,regulation of transcription, DNA-templated; GO:0006351,transcription, DNA-templated	DMPK coiled coil domain like
g2168	AP2/ERF-ERF	TF	AP2/ERF->AP2/ERF-ERF	107	7	-3.912	down	LG1	14762518	14763419	-	--	--	K14517 ethylene-responsive transcription factor 2 | (RefSeq) ERF2; ethylene responsive element binding factor 2 (A)	PREDICTED: ethylene-responsive transcription factor 2-like [Ipomoea nil]	RecName: Full=Ethylene-responsive transcription factor 2; Short=AtERF2; AltName: Full=Ethylene-responsive element-binding factor 2; Short=EREBP-2;	SubName: Full=Uncharacterized protein {ECO:0000313|EnsemblPlants:PGSC0003DMT400005836};	--	GO:0005634,nucleus; GO:0003677,DNA binding; GO:0003700,DNA-binding transcription factor activity; GO:0051301,cell division; GO:0009873,ethylene-activated signaling pathway; GO:0009864,induced systemic resistance, jasmonic acid mediated signaling pathway; GO:0010087,phloem or xylem histogenesis; GO:0045893,positive regulation of transcription, DNA-templated; GO:0010200,response to chitin; GO:00063…	AP2 domain
g23492	C2H2	TF	C2H2	133	51	-1.367	down	LG6	19409556	19411697	-	--	--	--	--	RecName: Full=Protein indeterminate-domain 2 {ECO:0000303|PubMed:16784536};	--	FOG: Zn-finger	GO:0003677,DNA binding; GO:0003700,DNA-binding transcription factor activity; GO:0046872,metal ion binding; GO:0006355,regulation of transcription, DNA-templated; GO:0006351,transcription, DNA-templated	Zinc-finger double domain
g23731	bHLH	TF	bHLH	1323	224	-2.562	down	LG6	21153438	21156598	-	--	--	K20558 transcription factor SPEECHLESS | (RefSeq) SPCH; basic helix-loop-helix (bHLH) DNA-binding superfamily protein (A)	--	RecName: Full=Transcription factor bHLH96; AltName: Full=Basic helix-loop-helix protein 96; Short=AtbHLH96; Short=bHLH 96; AltName: Full=Transcription factor EN 15; AltName: Full=bHLH transcription factor bHLH096;	--	--	GO:0005634,nucleus; GO:0003677,DNA binding; GO:0003700,DNA-binding transcription factor activity; GO:0046983,protein dimerization activity; GO:0006351,transcription, DNA-templated	Helix-loop-helix DNA-binding domain
g2378	Trihelix	TF	Trihelix	972	371	-1.389	down	LG1	16457930	16460195	-	--	--	--	--	RecName: Full=Trihelix transcription factor GT-2; AltName: Full=Trihelix DNA-binding protein GT-2;	--	Transcription factor GT-2 and related proteins, contains trihelix DNA-binding/SANT domain	GO:0005634,nucleus; GO:0003677,DNA binding; GO:0003700,DNA-binding transcription factor activity; GO:0006351,transcription, DNA-templated	Myb-like DNA-binding domain
g23929	bZIP	TF	bZIP	263	114	-1.214	down	LG6	22796654	22801557	-	--	--	--	PREDICTED: light-inducible protein CPRF2 [Ipomoea nil]	RecName: Full=Light-inducible protein CPRF2; AltName: Full=Common plant regulatory factor 2; Short=CPRF-2;	SubName: Full=Light-inducible protein CPRF2 {ECO:0000313|EMBL:PHT41082.1};	--	GO:0005634,nucleus; GO:0003677,DNA binding; GO:0003700,DNA-binding transcription factor activity; GO:0006351,transcription, DNA-templated	bZIP Maf transcription factor
g24051	PLATZ	TF	PLATZ	152	35	-2.141	down	LG6	23781522	23784170	+	--	--	--	PREDICTED: uncharacterized protein LOC109180910 isoform X2 [Ipomoea nil]	--	SubName: Full=Uncharacterized protein {ECO:0000313|EMBL:KDP36720.1};	--	--	B-box zinc finger
g24292	MYB	TF	MYB->MYB	58	191	1.706	up	LG6	25501659	25506305	+	--	--	K09422 transcription factor MYB, plant | (RefSeq) MYB3R-3; myb domain protein 3r-3 (A)	PREDICTED: myb-related protein B-like [Ipomoea nil]	RecName: Full=Transcription factor MYB3R-3 {ECO:0000303|PubMed:11597504}; AltName: Full=Myb-related protein 3R-3 {ECO:0000303|PubMed:11597504};	SubName: Full=uncharacterized protein LOC104235784 isoform X2 {ECO:0000313|RefSeq:XP_009787903.1, ECO:0000313|RefSeq:XP_009787905.1};	Transcription factor, Myb superfamily	GO:0005634,nucleus; GO:0003700,DNA-binding transcription factor activity; GO:0043565,sequence-specific DNA binding; GO:0006974,cellular response to DNA damage stimulus; GO:0008285,negative regulation of cell proliferation; GO:0045892,negative regulation of transcription, DNA-templated; GO:0009733,response to auxin; GO:0009723,response to ethylene; GO:0009753,response to jasmonic acid; GO:0009751,…	SLIDE
g24541	WRKY	TF	WRKY	159	32	-2.314	down	LG6	27075739	27078886	-	--	--	K13424 WRKY transcription factor 33 | (RefSeq) WRKY33; WRKY DNA-binding protein 33 (A)	PREDICTED: probable WRKY transcription factor 26 [Ipomoea nil]	RecName: Full=Probable WRKY transcription factor 33; AltName: Full=WRKY DNA-binding protein 33;	SubName: Full=probable WRKY transcription factor 26 isoform X1 {ECO:0000313|RefSeq:XP_016482650.1};	--	GO:0005634,nucleus; GO:0003700,DNA-binding transcription factor activity; GO:0043565,sequence-specific DNA binding; GO:0044212,transcription regulatory region DNA binding; GO:0010120,camalexin biosynthetic process; GO:0070370,cellular heat acclimation; GO:0034605,cellular response to heat; GO:0042742,defense response to bacterium; GO:0050832,defense response to fungus; GO:0010508,positive regulat…	WRKY DNA -binding domain
g2468	bHLH	TF	bHLH	117	51	-1.173	down	LG1	17184114	17189924	+	--	--	K20558 transcription factor SPEECHLESS | (RefSeq) SPCH; basic helix-loop-helix (bHLH) DNA-binding superfamily protein (A)	PREDICTED: transcription factor bHLH96-like [Ipomoea nil]	RecName: Full=Transcription factor bHLH96; AltName: Full=Basic helix-loop-helix protein 96; Short=AtbHLH96; Short=bHLH 96; AltName: Full=Transcription factor EN 15; AltName: Full=bHLH transcription factor bHLH096;	SubName: Full=transcription factor bHLH94-like {ECO:0000313|RefSeq:XP_016471744.1};	--	GO:0005634,nucleus; GO:0003677,DNA binding; GO:0003700,DNA-binding transcription factor activity; GO:0046983,protein dimerization activity; GO:0006351,transcription, DNA-templated	Helix-loop-helix DNA-binding domain
g247	bHLH	TF	bHLH	2050	1011	-1.02	down	LG1	1288258	1291485	-	--	--	--	PREDICTED: transcription factor ILR3-like [Ipomoea nil]	RecName: Full=Transcription factor ILR3; AltName: Full=Basic helix-loop-helix protein 105; Short=AtbHLH105; Short=bHLH 105; AltName: Full=Protein IAA-LEUCINE RESISTANT 3; AltName: Full=Transcription factor EN 133; AltName: Full=bHLH transcription factor bHLH105;	SubName: Full=Uncharacterized protein {ECO:0000313|EnsemblPlants:PGSC0003DMT400049592};	--	GO:0005634,nucleus; GO:0003700,DNA-binding transcription factor activity; GO:0046983,protein dimerization activity; GO:0043565,sequence-specific DNA binding; GO:0019760,glucosinolate metabolic process; GO:0006355,regulation of transcription, DNA-templated; GO:0006351,transcription, DNA-templated	Initiation control protein YabA
g2470	bHLH	TF	bHLH	119	20	-2.572	down	LG1	17202094	17205825	+	--	--	K20558 transcription factor SPEECHLESS | (RefSeq) SPCH; basic helix-loop-helix (bHLH) DNA-binding superfamily protein (A)	PREDICTED: transcription factor bHLH96-like [Ipomoea nil]	RecName: Full=Transcription factor bHLH96; AltName: Full=Basic helix-loop-helix protein 96; Short=AtbHLH96; Short=bHLH 96; AltName: Full=Transcription factor EN 15; AltName: Full=bHLH transcription factor bHLH096;	SubName: Full=transcription factor bHLH94-like {ECO:0000313|RefSeq:XP_016471744.1};	--	GO:0005634,nucleus; GO:0003677,DNA binding; GO:0003700,DNA-binding transcription factor activity; GO:0046983,protein dimerization activity; GO:0006351,transcription, DNA-templated	Mitochondrial fission regulator
g24748	bHLH	TF	bHLH	75	21	-1.846	down	LG6	28494874	28496564	-	--	--	--	PREDICTED: transcription factor ORG3-like [Ipomoea nil]	RecName: Full=Transcription factor ORG3; AltName: Full=Basic helix-loop-helix protein 39; Short=AtbHLH39; Short=bHLH 39; AltName: Full=OBP3-responsive gene 3; AltName: Full=Transcription factor EN 9; AltName: Full=bHLH transcription factor bHLH039;	SubName: Full=transcription factor ORG2-like {ECO:0000313|RefSeq:XP_016475053.1};	--	GO:0090575,RNA polymerase II transcription factor complex; GO:0003700,DNA-binding transcription factor activity; GO:0046983,protein dimerization activity; GO:0000977,RNA polymerase II regulatory region sequence-specific DNA binding; GO:0010106,cellular response to iron ion starvation; GO:0055072,iron ion homeostasis; GO:0006357,regulation of transcription by RNA polymerase II; GO:0006355,regulati…	Coiled-coil domain containing 32
g24753	Others	TR	Others	350	84	-2.058	down	LG6	28547401	28552592	+	--	--	K14492 two-component response regulator ARR-A family | (RefSeq) ARR9; response regulator 9 (A)	PREDICTED: two-component response regulator ARR9-like [Ipomoea nil]	RecName: Full=Two-component response regulator ARR9; AltName: Full=Response reactor 4;	SubName: Full=Type-A response regulator {ECO:0000313|EMBL:BAL43557.1};	GATA-4/5/6 transcription factors	GO:0005634,nucleus; GO:0000156,phosphorelay response regulator activity; GO:0007623,circadian rhythm; GO:0009736,cytokinin-activated signaling pathway; GO:0000160,phosphorelay signal transduction system; GO:0006355,regulation of transcription, DNA-templated; GO:0009735,response to cytokinin; GO:0006351,transcription, DNA-templated	Response regulator receiver domain
g24894	Others	TR	Others	344	57	-2.587	down	LG6	29386829	29389386	+	--	--	K14492 two-component response regulator ARR-A family | (RefSeq) ARR9; response regulator 9 (A)	PREDICTED: two-component response regulator ARR9-like [Ipomoea nil]	RecName: Full=Two-component response regulator ARR9; AltName: Full=Response reactor 4;	SubName: Full=Type-A response regulator {ECO:0000313|EMBL:BAL43557.1};	GATA-4/5/6 transcription factors	GO:0005634,nucleus; GO:0000156,phosphorelay response regulator activity; GO:0007623,circadian rhythm; GO:0009736,cytokinin-activated signaling pathway; GO:0000160,phosphorelay signal transduction system; GO:0006355,regulation of transcription, DNA-templated; GO:0009735,response to cytokinin; GO:0006351,transcription, DNA-templated	Response regulator receiver domain
g25021	AP2/ERF-ERF	TF	AP2/ERF->AP2/ERF-ERF	0	11	5.925	up	LG6	30173013	30174156	+	--	--	K09286 EREBP-like factor | (RefSeq) RAP2.11; related to AP2 11 (A)	PREDICTED: ethylene-responsive transcription factor RAP2-11-like [Ipomoea nil]	RecName: Full=Ethylene-responsive transcription factor RAP2-11; AltName: Full=Protein RELATED TO APETALA2 11;	SubName: Full=Uncharacterized protein {ECO:0000313|EMBL:CBI29953.3};	--	GO:0005634,nucleus; GO:0003700,DNA-binding transcription factor activity; GO:0043565,sequence-specific DNA binding; GO:0035865,cellular response to potassium ion; GO:0009873,ethylene-activated signaling pathway; GO:0048528,post-embryonic root development; GO:0009723,response to ethylene; GO:0000302,response to reactive oxygen species; GO:0006351,transcription, DNA-templated	AP2 domain
g25068	NF-YA	TF	NF-Y->NF-YA	1993	4888	1.294	up	LG6	30438759	30441690	-	--	--	K08064 nuclear transcription factor Y, alpha | (RefSeq) NF-YA10; nuclear factor Y, subunit A10 (A)	PREDICTED: nuclear transcription factor Y subunit A-10-like isoform X1 [Ipomoea nil]	RecName: Full=Nuclear transcription factor Y subunit A-10; Short=AtNF-YA-10;	SubName: Full=Nuclear transcription factor Y subunit A-4 {ECO:0000313|EMBL:PHT99020.1};	CCAAT-binding factor, subunit B (HAP2)	GO:0016602,CCAAT-binding factor complex; GO:0003677,DNA binding; GO:0003700,DNA-binding transcription factor activity; GO:0006351,transcription, DNA-templated	CCAAT-binding transcription factor (CBF-B/NF-YA) subunit B
g25092	B3	TF	B3->B3	36	0	-6.602	down	LG6	30595300	30599202	+	--	--	K09287 RAV-like factor | (RefSeq) RAV2; related to ABI3/VP1 2 (A)	--	RecName: Full=B3 domain-containing protein At2g36080; AltName: Full=Protein AUXIN RESPONSIVE FACTOR 31;	SubName: Full=B3 domain-containing protein At2g36080-like {ECO:0000313|RefSeq:XP_016448790.1};	--	GO:0005634,nucleus; GO:0003677,DNA binding; GO:0003700,DNA-binding transcription factor activity; GO:0045892,negative regulation of transcription, DNA-templated; GO:0080167,response to karrikin; GO:0006351,transcription, DNA-templated	B3 DNA binding domain
g25098	NAC	TF	NAC	9	41	2.179	up	LG6	30633418	30635445	-	--	--	--	--	RecName: Full=NAC domain-containing protein 90; Short=ANAC090;	SubName: Full=Uncharacterized protein {ECO:0000313|EMBL:CDP10642.1};	--	GO:0005634,nucleus; GO:0003677,DNA binding; GO:0003700,DNA-binding transcription factor activity; GO:0006351,transcription, DNA-templated	No apical meristem (NAM) protein
g25171	Trihelix	TF	Trihelix	3250	81	-5.314	down	LG6	31070651	31072494	-	--	--	--	--	--	SubName: Full=Uncharacterized protein {ECO:0000313|EMBL:KYP70951.1};	--	--	Myb-like DNA-binding domain
g25182	Trihelix	TF	Trihelix	2269	76	-4.903	down	LG6	31130553	31132404	-	--	--	--	--	--	SubName: Full=kinesin-related protein 4-like isoform X2 {ECO:0000313|RefSeq:XP_016732020.1};	--	--	Myb/SANT-like DNA-binding domain
g25276	AP2/ERF-ERF	TF	AP2/ERF->AP2/ERF-ERF	73	9	-3.097	down	LG7	82526	86373	+	--	--	K09286 EREBP-like factor | (RefSeq) ERF-1; ethylene responsive element binding factor 1 (A)	--	RecName: Full=Ethylene-responsive transcription factor 2; Short=NtERF2; AltName: Full=Ethylene-responsive element-binding factor 2; Short=EREBP-2;	SubName: Full=ethylene-responsive transcription factor 2-like {ECO:0000313|RefSeq:XP_016728556.1};	--	GO:0005634,nucleus; GO:0003677,DNA binding; GO:0003700,DNA-binding transcription factor activity; GO:0006952,defense response; GO:0009873,ethylene-activated signaling pathway; GO:0006351,transcription, DNA-templated	AP2 domain
g25313	Others	TR	Others	76	22	-1.822	down	LG7	309833	317200	-	--	--	K14491 two-component response regulator ARR-B family | (RefSeq) RR14; response regulator 14 (A)	--	RecName: Full=Two-component response regulator ORR26 {ECO:0000305}; AltName: Full=OsRRB6 {ECO:0000303|PubMed:16891544};	SubName: Full=Uncharacterized protein {ECO:0000313|EMBL:CBI31844.3};	Uncharacterized conserved protein, contains TraB domain	GO:0005634,nucleus; GO:0003677,DNA binding; GO:0003700,DNA-binding transcription factor activity; GO:0009736,cytokinin-activated signaling pathway; GO:0000160,phosphorelay signal transduction system; GO:0010082,regulation of root meristem growth; GO:0006355,regulation of transcription, DNA-templated; GO:0006351,transcription, DNA-templated	Myb-like DNA-binding domain
g25316	AP2/ERF-ERF	TF	AP2/ERF->AP2/ERF-ERF	5	40	2.886	up	LG7	323145	324257	+	--	--	K09286 EREBP-like factor | (RefSeq) DREB1A; dehydration response element B1A (A)	--	RecName: Full=Dehydration-responsive element-binding protein 1D; Short=Protein DREB1D; AltName: Full=C-repeat/dehydration-responsive element-binding factor 4; Short=C-repeat-binding factor 4; Short=CRT/DRE-binding factor 4;	SubName: Full=DRE-binding transcription factor swDREB1 {ECO:0000313|EMBL:ABR23056.1};	--	GO:0005634,nucleus; GO:0003700,DNA-binding transcription factor activity; GO:0043565,sequence-specific DNA binding; GO:0009738,abscisic acid-activated signaling pathway; GO:0019760,glucosinolate metabolic process; GO:0006351,transcription, DNA-templated	AP2 domain
g25336	bHLH	TF	bHLH	20	0	-6.696	down	LG7	461084	463332	-	--	--	--	--	RecName: Full=Transcription factor bHLH120; AltName: Full=Basic helix-loop-helix protein 120; Short=AtbHLH120; Short=bHLH 120; AltName: Full=Transcription factor EN 4; AltName: Full=bHLH transcription factor bHLH120;	SubName: Full=Transcription factor bhlh125 {ECO:0000313|EMBL:OIT21601.1};	--	GO:0090575,RNA polymerase II transcription factor complex; GO:0003700,DNA-binding transcription factor activity; GO:0046983,protein dimerization activity; GO:0000977,RNA polymerase II regulatory region sequence-specific DNA binding; GO:0006357,regulation of transcription by RNA polymerase II; GO:0006355,regulation of transcription, DNA-templated; GO:0006351,transcription, DNA-templated	Helix-loop-helix DNA-binding domain
g25337	bHLH	TF	bHLH	26	63	1.307	up	LG7	464200	468892	-	--	--	--	--	RecName: Full=Transcription factor bHLH126; AltName: Full=Basic helix-loop-helix protein 126; Short=AtbHLH126; Short=bHLH 126; AltName: Full=Transcription factor EN 3; AltName: Full=bHLH transcription factor bHLH126;	SubName: Full=transcription factor bHLH118-like isoform X1 {ECO:0000313|RefSeq:XP_016443891.1};	--	GO:0090575,RNA polymerase II transcription factor complex; GO:0046983,protein dimerization activity; GO:0000977,RNA polymerase II regulatory region sequence-specific DNA binding; GO:0006357,regulation of transcription by RNA polymerase II; GO:0006351,transcription, DNA-templated	Helix-loop-helix DNA-binding domain
g255	GRAS	TF	GRAS	473	119	-1.986	down	LG1	1327320	1331108	+	--	--	K14494 DELLA protein | (RefSeq) RGL1; RGA-like 1 (A)	--	RecName: Full=Chitin-inducible gibberellin-responsive protein 1;	SubName: Full=scarecrow-like protein 21 {ECO:0000313|RefSeq:XP_016463344.1};	--	GO:0005634,nucleus; GO:0003700,DNA-binding transcription factor activity; GO:0043565,sequence-specific DNA binding; GO:0006355,regulation of transcription, DNA-templated; GO:0006351,transcription, DNA-templated	GRAS domain family
g25699	MYB	TF	MYB->MYB	83	8	-3.347	down	LG7	2669267	2671190	-	--	--	K09422 transcription factor MYB, plant | (RefSeq) MYB15; myb domain protein 15 (A)	PREDICTED: transcription repressor MYB6-like [Ipomoea nil]	RecName: Full=Transcription factor MYB4 {ECO:0000305}; AltName: Full=Myb-related protein 4 {ECO:0000305}; Short=OsMyb4 {ECO:0000303|PubMed:14675437}; AltName: Full=Transcription factor RLTR1 {ECO:0000312|EMBL:AAP92750.1};	SubName: Full=Myb-related protein myb4 {ECO:0000313|EMBL:OIT03094.1};	Transcription factor, Myb superfamily	GO:0005634,nucleus; GO:0000981,DNA-binding transcription factor activity, RNA polymerase II-specific; GO:0043565,sequence-specific DNA binding; GO:0001135,RNA polymerase II transcription regulator recruiting activity; GO:0044212,transcription regulatory region DNA binding; GO:0030154,cell differentiation; GO:0045893,positive regulation of transcription, DNA-templated; GO:0006357,regulation of tra…	Myb DNA-binding like
g25719	Others	TR	Others	2125	479	-2.149	down	LG7	2780122	2784921	+	--	--	K14509 ethylene receptor [EC:2.7.13.-] | (RefSeq) EIN4; Signal transduction histidine kinase, hybrid-type, ethylene sensor (A)	PREDICTED: protein EIN4 [Ipomoea nil]	RecName: Full=Protein EIN4; Short=AtEIN4; EC=2.7.11.-; AltName: Full=Protein ETHYLENE INSENSITIVE 4;	RecName: Full=Ethylene receptor {ECO:0000256|PIRNR:PIRNR026389};	Sensory transduction histidine kinase	GO:0005783,endoplasmic reticulum; GO:0005789,endoplasmic reticulum membrane; GO:0016021,integral component of membrane; GO:0005524,ATP binding; GO:0051740,ethylene binding; GO:0038199,ethylene receptor activity; GO:0046872,metal ion binding; GO:0000155,phosphorelay sensor kinase activity; GO:0004674,protein serine/threonine kinase activity; GO:0004872,NA; GO:0010105,negative regulation of ethylen…	GAF domain
g25723	AP2/ERF-ERF	TF	AP2/ERF->AP2/ERF-ERF	189	1	-7.11	down	LG7	2807852	2808808	+	--	--	K14516 ethylene-responsive transcription factor 1 | (RefSeq) ERF1; ethylene response factor 1 (A)	PREDICTED: ethylene-responsive transcription factor 1B-like [Ipomoea nil]	RecName: Full=Ethylene-responsive transcription factor 15; Short=AtERF15; AltName: Full=Ethylene-responsive element-binding factor 15; Short=EREBP-15;	SubName: Full=ethylene-responsive transcription factor 1B-like {ECO:0000313|RefSeq:XP_009764919.1};	--	GO:0009507,chloroplast; GO:0005634,nucleus; GO:0003677,DNA binding; GO:0003700,DNA-binding transcription factor activity; GO:0006952,defense response; GO:0009873,ethylene-activated signaling pathway; GO:0010200,response to chitin; GO:0006351,transcription, DNA-templated	AP2 domain
g25827	HSF	TF	HSF	2506	834	-1.587	down	LG7	3423860	3425956	-	--	--	K09419 heat shock transcription factor, other eukaryote | (RefSeq) HSFA2; heat shock transcription factor A2 (A)	PREDICTED: heat shock factor protein HSF30-like isoform X1 [Ipomoea nil]	RecName: Full=Heat stress transcription factor A-2e; AltName: Full=Heat stress transcription factor 12; Short=OsHsf-12;	SubName: Full=heat stress transcription factor A-2-like {ECO:0000313|RefSeq:XP_016515036.1, ECO:0000313|RefSeq:XP_016515037.1, ECO:0000313|RefSeq:XP_016515038.1};	Heat shock transcription factor	GO:0005737,cytoplasm; GO:0005634,nucleus; GO:0003700,DNA-binding transcription factor activity; GO:0043565,sequence-specific DNA binding; GO:0006351,transcription, DNA-templated	HSF-type DNA-binding
g25913	MYB-related	TF	MYB->MYB-related	203	37	-2.464	down	LG7	4080697	4082672	-	--	--	--	PREDICTED: transcription factor MYB1R1-like [Ipomoea nil]	RecName: Full=Probable transcription factor At5g61620 {ECO:0000305}; AltName: Full=Myb-related protein At5g61620 {ECO:0000305};	SubName: Full=Myb-like transcription factor family protein, putative {ECO:0000313|EMBL:EOY30492.1};	--	GO:0005634,nucleus; GO:0003677,DNA binding; GO:0003700,DNA-binding transcription factor activity; GO:0008270,zinc ion binding; GO:0006355,regulation of transcription, DNA-templated; GO:0006351,transcription, DNA-templated	Myb-like DNA-binding domain
g25936	MYB	TF	MYB->MYB	56	23	-1.31	down	LG7	4234148	4235742	-	--	--	K09422 transcription factor MYB, plant | (RefSeq) MYB36; myb domain protein 36 (A)	PREDICTED: transcription factor MYB36-like [Ipomoea nil]	RecName: Full=Transcription factor MYB36 {ECO:0000303|PubMed:9839469}; AltName: Full=Myb-related protein 36 {ECO:0000303|PubMed:9839469}; Short=AtMYB36 {ECO:0000303|PubMed:9839469};	SubName: Full=MYB11 {ECO:0000313|EMBL:AGZ16410.1};	Transcription factor, Myb superfamily	GO:0048226,Casparian strip; GO:0005634,nucleus; GO:0003700,DNA-binding transcription factor activity; GO:0000981,DNA-binding transcription factor activity, RNA polymerase II-specific; GO:0043565,sequence-specific DNA binding; GO:0001135,RNA polymerase II transcription regulator recruiting activity; GO:0044212,transcription regulatory region DNA binding; GO:0030154,cell differentiation; GO:0035987…	Myb-like DNA-binding domain
g26142	AP2/ERF-ERF	TF	AP2/ERF->AP2/ERF-ERF	30	1	-4.402	down	LG7	5750310	5751172	-	--	--	K09286 EREBP-like factor | (RefSeq) ERF9; erf domain protein 9 (A)	PREDICTED: ethylene-responsive transcription factor WIN1-like [Ipomoea nil]	RecName: Full=Ethylene-responsive transcription factor WIN1; AltName: Full=Protein SHINE 1; AltName: Full=Protein WAX INDUCER 1;	SubName: Full=ethylene-responsive transcription factor WIN1-like {ECO:0000313|RefSeq:XP_016485293.1};	--	GO:0005634,nucleus; GO:0003700,DNA-binding transcription factor activity; GO:0043565,sequence-specific DNA binding; GO:0010143,cutin biosynthetic process; GO:0009873,ethylene-activated signaling pathway; GO:0009414,response to water deprivation; GO:0006351,transcription, DNA-templated; GO:0010166,wax metabolic process	AP2 domain
g26505	GARP-ARR-B	TF	GARP->GARP-ARR-B	53	112	1.073	up	LG7	8751049	8755090	+	--	--	K14491 two-component response regulator ARR-B family | (RefSeq) RR12; response regulator 12 (A)	PREDICTED: two-component response regulator ARR12-like [Ipomoea nil]	RecName: Full=Two-component response regulator ORR24 {ECO:0000305};	RecName: Full=Two-component response regulator {ECO:0000256|PIRNR:PIRNR036392};	GATA-4/5/6 transcription factors	GO:0005634,nucleus; GO:0003677,DNA binding; GO:0003700,DNA-binding transcription factor activity; GO:0009736,cytokinin-activated signaling pathway; GO:0000160,phosphorelay signal transduction system; GO:0006351,transcription, DNA-templated	Myb-like DNA-binding domain
g26525	bHLH	TF	bHLH	190	642	1.754	up	LG7	8883109	8886793	+	--	--	K12126 phytochrome-interacting factor 3 | (RefSeq) PIF3; phytochrome interacting factor 3 (A)	PREDICTED: transcription factor bHLH66-like isoform X2 [Ipomoea nil]	RecName: Full=Transcription factor bHLH66; AltName: Full=Basic helix-loop-helix protein 66; Short=AtbHLH66; Short=bHLH 66; AltName: Full=Transcription factor EN 95; AltName: Full=bHLH transcription factor bHLH066;	SubName: Full=transcription factor bHLH66-like {ECO:0000313|RefSeq:XP_009790289.1};	--	GO:0005634,nucleus; GO:0001046,core promoter sequence-specific DNA binding; GO:0003700,DNA-binding transcription factor activity; GO:0046983,protein dimerization activity; GO:0001228,DNA-binding transcription activator activity, RNA polymerase II-specific; GO:0055046,microgametogenesis; GO:0048235,pollen sperm cell differentiation; GO:0006355,regulation of transcription, DNA-templated; GO:0080147…	Helix-loop-helix DNA-binding domain
g27123	HSF	TF	HSF	236	46	-2.374	down	LG7	13977927	13978641	-	--	--	K09419 heat shock transcription factor, other eukaryote | (RefSeq) HSFA7A; heat shock transcription factor A7A (A)	--	RecName: Full=Heat stress transcription factor A-2e; AltName: Full=Heat stress transcription factor 12; Short=OsHsf-12;	--	Heat shock transcription factor	GO:0005737,cytoplasm; GO:0005634,nucleus; GO:0003700,DNA-binding transcription factor activity; GO:0043565,sequence-specific DNA binding; GO:0006351,transcription, DNA-templated	HSF-type DNA-binding
g27214	HB-HD-ZIP	TF	HB->HB-HD-ZIP	64	12	-2.464	down	LG7	14622720	14624080	-	--	--	K09338 homeobox-leucine zipper protein | (RefSeq) HB-12; homeobox 12 (A)	--	RecName: Full=Homeobox-leucine zipper protein ATHB-7; AltName: Full=HD-ZIP protein ATHB-7; AltName: Full=Homeodomain transcription factor ATHB-7;	--	Transcription factor HEX, contains HOX and HALZ domains	GO:0005634,nucleus; GO:0003700,DNA-binding transcription factor activity; GO:0043565,sequence-specific DNA binding; GO:0045893,positive regulation of transcription, DNA-templated; GO:0009737,response to abscisic acid; GO:0009414,response to water deprivation; GO:0006351,transcription, DNA-templated	Homeobox KN domain
g27665	DDT	TR	DDT	41	96	1.242	up	LG7	17932479	17936040	+	--	--	--	PREDICTED: DDT domain-containing protein DDB_G0282237-like isoform X2 [Ipomoea nil]	RecName: Full=Homeobox-DDT domain protein RLT1 {ECO:0000305}; AltName: Full=Protein HOMEOBOX-1 {ECO:0000305}; AltName: Full=Protein RINGLET 1 {ECO:0000303|PubMed:22694359};	SubName: Full=Uncharacterized protein {ECO:0000313|EnsemblPlants:PGSC0003DMT400060265};	Chromatin remodeling complex WSTF-ISWI, large subunit (contains heterochromatin localization, PHD and BROMO domains)	GO:0005634,nucleus; GO:0003677,DNA binding; GO:0003700,DNA-binding transcription factor activity; GO:0009908,flower development; GO:0045892,negative regulation of transcription, DNA-templated; GO:0048510,regulation of timing of transition from vegetative to reproductive phase; GO:0006351,transcription, DNA-templated	ATP-utilising chromatin assembly and remodelling N-terminal
g28394	NAC	TF	NAC	1894	44	-5.405	down	LG7	22909075	22911297	+	--	--	--	PREDICTED: NAC domain-containing protein 2-like [Ipomoea nil]	RecName: Full=NAC domain-containing protein 2; Short=ANAC002;	SubName: Full=NAC1 {ECO:0000313|EMBL:ACT55332.1};	--	GO:0005634,nucleus; GO:0003677,DNA binding; GO:0003700,DNA-binding transcription factor activity; GO:0009788,negative regulation of abscisic acid-activated signaling pathway; GO:0009611,response to wounding; GO:0006351,transcription, DNA-templated	No apical meristem (NAM) protein
g288	NAC	TF	NAC	171	4	-5.37	down	LG1	1504025	1505644	-	--	--	--	PREDICTED: NAC domain-containing protein 72-like [Ipomoea nil]	RecName: Full=NAC domain-containing protein 72; Short=ANAC072; AltName: Full=Protein RESPONSIVE TO DESICCATION 26;	SubName: Full=NAC domain-containing protein 72-like {ECO:0000313|RefSeq:XP_016484889.1};	--	GO:0005634,nucleus; GO:0003677,DNA binding; GO:0006355,regulation of transcription, DNA-templated; GO:0006351,transcription, DNA-templated	No apical meristem (NAM) protein
g28924	MYB	TF	MYB->MYB	225	744	1.726	up	LG7	26720524	26722040	+	--	--	K09422 transcription factor MYB, plant | (RefSeq) MYB73; myb domain protein 73 (A)	PREDICTED: transcription factor MYB44-like [Ipomoea nil]	RecName: Full=Transcription factor MYB73 {ECO:0000303|PubMed:11597504}; AltName: Full=Myb-related protein 73 {ECO:0000303|PubMed:11597504}; Short=AtMYB73 {ECO:0000303|PubMed:11597504};	SubName: Full=transcription factor MYB44-like {ECO:0000313|RefSeq:XP_016478014.1};	Transcription factor, Myb superfamily	GO:0005634,nucleus; GO:0003700,DNA-binding transcription factor activity; GO:0000981,DNA-binding transcription factor activity, RNA polymerase II-specific; GO:0043565,sequence-specific DNA binding; GO:0001135,RNA polymerase II transcription regulator recruiting activity; GO:0044212,transcription regulatory region DNA binding; GO:0030154,cell differentiation; GO:0019760,glucosinolate metabolic pro…	Ricin-type beta-trefoil lectin domain
g28993	MYB	TF	MYB->MYB	341	1179	1.79	up	LG7	27257271	27258677	+	--	--	K09422 transcription factor MYB, plant | (RefSeq) MYB73; myb domain protein 73 (A)	--	RecName: Full=Transcription factor MYB73 {ECO:0000303|PubMed:11597504}; AltName: Full=Myb-related protein 73 {ECO:0000303|PubMed:11597504}; Short=AtMYB73 {ECO:0000303|PubMed:11597504};	SubName: Full=transcription factor MYB44 {ECO:0000313|RefSeq:XP_009798591.1};	Transcription factor, Myb superfamily	GO:0005634,nucleus; GO:0003700,DNA-binding transcription factor activity; GO:0000981,DNA-binding transcription factor activity, RNA polymerase II-specific; GO:0043565,sequence-specific DNA binding; GO:0001135,RNA polymerase II transcription regulator recruiting activity; GO:0044212,transcription regulatory region DNA binding; GO:0030154,cell differentiation; GO:0019760,glucosinolate metabolic pro…	Myb DNA-binding like
g29047	TAZ	TR	TAZ	78	13	-2.576	down	LG7	27624218	27626648	-	--	--	K04498 E1A/CREB-binding protein [EC:2.3.1.48] | (RefSeq) HAC1; histone acetyltransferase of the CBP family 1 (A)	--	RecName: Full=BTB/POZ and TAZ domain-containing protein 4; AltName: Full=BTB and TAZ domain protein 4;	SubName: Full=BTB/POZ and TAZ domain-containing protein 4 {ECO:0000313|RefSeq:XP_016560955.1, ECO:0000313|RefSeq:XP_016560956.1};	CREB binding protein/P300 and related TAZ Zn-finger proteins	GO:0005737,cytoplasm; GO:0005634,nucleus; GO:0019005,SCF ubiquitin ligase complex; GO:0005774,vacuolar membrane; GO:0005516,calmodulin binding; GO:0004402,histone acetyltransferase activity; GO:0003712,transcription coregulator activity; GO:0031625,ubiquitin protein ligase binding; GO:0008270,zinc ion binding; GO:0043161,proteasome-mediated ubiquitin-dependent protein catabolic process; GO:004278…	BTB And C-terminal Kelch
g29126	bHLH	TF	bHLH	5965	2019	-1.563	down	LG7	28218012	28219737	-	--	--	K13422 transcription factor MYC2 | (RefSeq) MYC2; Basic helix-loop-helix (bHLH) DNA-binding family protein (A)	--	RecName: Full=Transcription factor bHLH93; AltName: Full=Basic helix-loop-helix protein 93; Short=AtbHLH93; Short=bHLH 93; AltName: Full=Transcription factor EN 47; AltName: Full=bHLH transcription factor bHLH093;	--	--	GO:0005634,nucleus; GO:0003677,DNA binding; GO:0003700,DNA-binding transcription factor activity; GO:0046983,protein dimerization activity; GO:0045487,gibberellin catabolic process; GO:0007275,multicellular organism development; GO:0010371,regulation of gibberellin biosynthetic process; GO:0006351,transcription, DNA-templated	Helix-loop-helix DNA-binding domain
g29137	MADS-M-type	TF	MADS->MADS-M-type	89	16	-2.504	down	LG7	28295745	28296157	-	--	--	K09264 MADS-box transcription factor, plant | (RefSeq) AGL44; AGAMOUS-like 44 (A)	--	RecName: Full=MADS-box transcription factor ANR1; AltName: Full=Protein AGAMOUS-LIKE 44; AltName: Full=Protein ARABIDOPSIS NITRATE REGULATED 1;	--	MADS box transcription factor	GO:0005634,nucleus; GO:0003700,DNA-binding transcription factor activity; GO:0046983,protein dimerization activity; GO:0000977,RNA polymerase II regulatory region sequence-specific DNA binding; GO:0008134,transcription factor binding; GO:0071249,cellular response to nitrate; GO:0048527,lateral root development; GO:0045944,positive regulation of transcription by RNA polymerase II; GO:0010167,respo…	SRF-type transcription factor (DNA-binding and dimerisation domain)
g29145	MADS-MIKC	TF	MADS->MADS-MIKC	718	83	-3.118	down	LG7	28348685	28353827	-	--	--	K09264 MADS-box transcription factor, plant | (RefSeq) AGL44; AGAMOUS-like 44 (A)	--	RecName: Full=MADS-box transcription factor 27; AltName: Full=OsMADS27; AltName: Full=RMADS218;	--	MADS box transcription factor	GO:0005634,nucleus; GO:0003700,DNA-binding transcription factor activity; GO:0046983,protein dimerization activity; GO:0000977,RNA polymerase II regulatory region sequence-specific DNA binding; GO:0045944,positive regulation of transcription by RNA polymerase II; GO:0006351,transcription, DNA-templated	K-box region
g29221	LOB	TF	LOB	12168	201	-5.922	down	LG7	28842217	28843398	+	--	--	--	--	RecName: Full=LOB domain-containing protein 40; AltName: Full=ASYMMETRIC LEAVES 2-like protein 37; Short=AS2-like protein 37;	--	--	GO:0009739,response to gibberellin	Lateral organ boundaries (LOB) domain
g29273	LOB	TF	LOB	11813	222	-5.737	down	LG7	29266026	29267217	-	--	--	--	--	RecName: Full=LOB domain-containing protein 41; AltName: Full=ASYMMETRIC LEAVES 2-like protein 38; Short=AS2-like protein 38;	--	--	GO:0006355,regulation of transcription, DNA-templated	Lateral organ boundaries (LOB) domain
g29674	AP2/ERF-ERF	TF	AP2/ERF->AP2/ERF-ERF	36	100	1.502	up	LG7	31988866	31989821	+	--	--	K14516 ethylene-responsive transcription factor 1 | (RefSeq) ERF1; ethylene response factor 1 (A)	PREDICTED: ethylene-responsive transcription factor 1B-like [Ipomoea nil]	RecName: Full=Ethylene-responsive transcription factor 1B; Short=AtERF1B; AltName: Full=Ethylene-responsive element-binding factor 1B; Short=EREBP-1B;	SubName: Full=Ethylene-responsive transcription factor 1b {ECO:0000313|EMBL:OIT21017.1};	--	GO:0005634,nucleus; GO:0003677,DNA binding; GO:0003700,DNA-binding transcription factor activity; GO:0006952,defense response; GO:0009873,ethylene-activated signaling pathway; GO:0009867,jasmonic acid mediated signaling pathway; GO:0006351,transcription, DNA-templated	AP2 domain
g29758	Tify	TF	Tify	121	2	-5.68	down	LG7	32642759	32644889	+	--	--	K13464 jasmonate ZIM domain-containing protein | (RefSeq) TIFY7; TIFY domain/Divergent CCT motif family protein (A)	PREDICTED: protein TIFY 10A-like [Ipomoea nil]	RecName: Full=Protein TIFY 7; AltName: Full=Jasmonate ZIM domain-containing protein 9;	SubName: Full=protein TIFY 10B-like isoform X1 {ECO:0000313|RefSeq:XP_016442472.1};	--	GO:0005634,nucleus; GO:0003714,transcription corepressor activity; GO:0006952,defense response; GO:1903507,negative regulation of nucleic acid-templated transcription; GO:0031347,regulation of defense response; GO:2000022,regulation of jasmonic acid mediated signaling pathway; GO:0006355,regulation of transcription, DNA-templated; GO:0009753,response to jasmonic acid; GO:0009611,response to wound…	Protein of unknown function (DUF1098)
g29859	HB-HD-ZIP	TF	HB->HB-HD-ZIP	5038	13129	1.382	up	LG7	33316740	33318452	+	--	--	K09338 homeobox-leucine zipper protein | (RefSeq) HB6; homeobox protein 6 (A)	PREDICTED: homeobox-leucine zipper protein ATHB-6-like isoform X1 [Ipomoea nil]	RecName: Full=Homeobox-leucine zipper protein ATHB-6; AltName: Full=HD-ZIP protein ATHB-6; AltName: Full=Homeodomain transcription factor ATHB-6;	SubName: Full=homeobox-leucine zipper protein ATHB-6-like {ECO:0000313|RefSeq:XP_016500042.1};	Transcription factor HEX, contains HOX and HALZ domains	GO:0005634,nucleus; GO:0003677,DNA binding; GO:0003700,DNA-binding transcription factor activity; GO:0043565,sequence-specific DNA binding; GO:0009738,abscisic acid-activated signaling pathway; GO:0009788,negative regulation of abscisic acid-activated signaling pathway; GO:0045893,positive regulation of transcription, DNA-templated; GO:0009414,response to water deprivation; GO:0006351,transcripti…	Fungal Transforming acidic coiled-coil (TACC) proteins
g29884	C2H2	TF	C2H2	467	175	-1.417	down	LG7	33464281	33466218	-	--	--	--	PREDICTED: protein SENSITIVE TO PROTON RHIZOTOXICITY 1-like [Ipomoea nil]	RecName: Full=Protein SENSITIVE TO PROTON RHIZOTOXICITY 1 {ECO:0000303|PubMed:17535918}; AltName: Full=Zinc finger protein STOP1 {ECO:0000303|PubMed:17535918};	SubName: Full=Protein sensitive to proton rhizotoxicity 1 {ECO:0000313|EMBL:OIT26869.1};	FOG: Zn-finger	GO:0005634,nucleus; GO:0003700,DNA-binding transcription factor activity; GO:0046872,metal ion binding; GO:0003676,nucleic acid binding; GO:0006355,regulation of transcription, DNA-templated; GO:0010447,response to acidic pH; GO:0010044,response to aluminum ion; GO:0006351,transcription, DNA-templated	C2H2-type zinc finger
g30003	bZIP	TF	bZIP	10	0	-5.698	down	LG7	34161573	34162546	-	--	--	K09060 plant G-box-binding factor | (RefSeq) bZIP16; basic region/leucine zipper transcription factor 16 (A)	PREDICTED: basic leucine zipper 43-like [Ipomoea nil]	RecName: Full=Basic leucine zipper 43 {ECO:0000303|PubMed:11906833}; Short=AtbZIP43 {ECO:0000303|PubMed:11906833}; Short=bZIP protein 43 {ECO:0000303|PubMed:11906833};	SubName: Full=Uncharacterized protein {ECO:0000313|EMBL:CDP02366.1};	--	GO:0005634,nucleus; GO:0003677,DNA binding; GO:0003700,DNA-binding transcription factor activity; GO:0006351,transcription, DNA-templated	SWI5-dependent HO expression protein 3
g30038	GARP-G2-like	TF	GARP->GARP-G2-like	9	36	1.964	up	LG7	34397258	34401950	-	--	--	K14491 two-component response regulator ARR-B family | (RefSeq) RR19; response regulator 19 (A)	PREDICTED: transcription repressor KAN1 isoform X1 [Ipomoea nil]	RecName: Full=Transcription repressor KAN1; AltName: Full=Protein KANADI 1;	SubName: Full=KANADI-like transcription factor FEATHERED {ECO:0000313|EMBL:BAE73188.1};	--	GO:0005634,nucleus; GO:0003700,DNA-binding transcription factor activity; GO:0044212,transcription regulatory region DNA binding; GO:0010158,abaxial cell fate specification; GO:0009943,adaxial/abaxial axis specification; GO:0048440,carpel development; GO:1905392,plant organ morphogenesis; GO:0048481,plant ovule development; GO:0009944,polarity specification of adaxial/abaxial axis; GO:0009956,rad…	TRIM C-terminal subgroup One Signature domain
g30070	NAC	TF	NAC	193	6	-5.131	down	LG7	34635545	34639317	-	--	--	--	PREDICTED: NAC domain-containing protein 92-like [Ipomoea nil]	RecName: Full=NAC domain-containing protein 100 {ECO:0000303|PubMed:15029955}; Short=ANAC100 {ECO:0000303|PubMed:15029955}; Short=AtNAC5;	SubName: Full=NAC domain-containing protein 92 {ECO:0000313|RefSeq:XP_016561385.1};	--	GO:0005634,nucleus; GO:0003677,DNA binding; GO:0003700,DNA-binding transcription factor activity; GO:0006351,transcription, DNA-templated	No apical meristem (NAM) protein
g30119	MYB	TF	MYB->MYB	337	26	-3.723	down	LG7	34895921	34897439	+	--	--	K09422 transcription factor MYB, plant | (RefSeq) TDF1; Duplicated homeodomain-like superfamily protein (A)	PREDICTED: transcription factor MYB35 [Ipomoea nil]	RecName: Full=Transcription factor MYB35 {ECO:0000303|PubMed:9839469}; AltName: Full=Myb-related protein 35 {ECO:0000303|PubMed:9839469}; Short=AtMYB35 {ECO:0000303|PubMed:9839469}; AltName: Full=Protein DEFECTIVE IN TAPETAL DEVELOPMENT AND FUNCTION 1 {ECO:0000303|PubMed:18397379};	SubName: Full=transcription factor MYB35-like {ECO:0000313|RefSeq:XP_016441905.1};	Transcription factor, Myb superfamily	GO:0005634,nucleus; GO:0003700,DNA-binding transcription factor activity; GO:0000981,DNA-binding transcription factor activity, RNA polymerase II-specific; GO:0043565,sequence-specific DNA binding; GO:0001135,RNA polymerase II transcription regulator recruiting activity; GO:0044212,transcription regulatory region DNA binding; GO:0048658,anther wall tapetum development; GO:0052545,callose localiza…	SLIDE
g30129	RWP-RK	TF	RWP-RK	16	0	-6.413	down	LG7	34946913	34949243	+	--	--	--	PREDICTED: protein NRT1/ PTR FAMILY 5.8-like [Ipomoea nil]	RecName: Full=Protein NRT1/ PTR FAMILY 5.8; Short=AtNPF5.8;	SubName: Full=protein NRT1/ PTR FAMILY 5.8-like {ECO:0000313|RefSeq:XP_016434461.1};	H+/oligopeptide symporter	GO:0016021,integral component of membrane; GO:0022857,transmembrane transporter activity; GO:0009624,response to nematode	POT family
g30418	GRAS	TF	GRAS	119	241	1.015	up	LG8	967555	969388	+	--	--	K14494 DELLA protein | (RefSeq) RGL2; RGA-like 2 (A)	PREDICTED: scarecrow-like protein 6 [Ipomoea nil]	RecName: Full=Scarecrow-like protein 6; Short=AtSCL6; AltName: Full=GRAS family protein 22; Short=AtGRAS-22; AltName: Full=SCL6-IV;	SubName: Full=Uncharacterized protein {ECO:0000313|EMBL:PIN09668.1};	--	GO:0005634,nucleus; GO:0003700,DNA-binding transcription factor activity; GO:0043565,sequence-specific DNA binding; GO:0030154,cell differentiation; GO:0051301,cell division; GO:0007623,circadian rhythm; GO:0006355,regulation of transcription, DNA-templated; GO:0048768,root hair cell tip growth; GO:0006351,transcription, DNA-templated	GRAS domain family
g30557	Others	TR	Others	564	1192	1.081	up	LG8	1740217	1741672	-	--	--	K14492 two-component response regulator ARR-A family | (RefSeq) ARR9; response regulator 9 (A)	PREDICTED: translation initiation factor eIF-2B subunit beta isoform X2 [Ipomoea nil]	RecName: Full=Two-component response regulator ORR4 {ECO:0000305}; AltName: Full=OsRR4 {ECO:0000303|PubMed:16919402};	SubName: Full=two-component response regulator ORR10-like {ECO:0000313|RefSeq:XP_016451923.1};	GATA-4/5/6 transcription factors	GO:0005634,nucleus; GO:0009736,cytokinin-activated signaling pathway; GO:0000160,phosphorelay signal transduction system; GO:0006355,regulation of transcription, DNA-templated; GO:0006351,transcription, DNA-templated	Response regulator receiver domain
g30783	bZIP	TF	bZIP	64	28	-1.165	down	LG8	2884751	2889607	-	--	--	K20557 transcription factor VIP1 | (RefSeq) VIP1; VIRE2-interacting protein 1 (A)	PREDICTED: basic leucine zipper 61-like [Ipomoea nil]	RecName: Full=Basic leucine zipper 61 {ECO:0000303|PubMed:11906833}; Short=AtbZIP61 {ECO:0000303|PubMed:11906833}; Short=bZIP protein 61;	SubName: Full=Basic leucine zipper 34 {ECO:0000313|EMBL:OIS97725.1};	--	GO:0005634,nucleus; GO:0003677,DNA binding; GO:0003700,DNA-binding transcription factor activity; GO:0000977,RNA polymerase II regulatory region sequence-specific DNA binding; GO:0045893,positive regulation of transcription, DNA-templated; GO:0006351,transcription, DNA-templated	Autophagy protein 16 (ATG16)
g30909	Others	TR	Others	1727	461	-1.905	down	LG8	3555777	3556983	-	--	--	K12135 zinc finger protein CONSTANS | (RefSeq) CO; B-box type zinc finger protein with CCT domain-containing protein (A)	PREDICTED: zinc finger protein CONSTANS-LIKE 2-like isoform X2 [Ipomoea nil]	RecName: Full=B-box domain protein 31 {ECO:0000303|PubMed:19920209}; Short=AtBBX31 {ECO:0000303|PubMed:19920209}; AltName: Full=Microprotein 1B {ECO:0000303|PubMed:27015278};	SubName: Full=Uncharacterized protein {ECO:0000313|EMBL:OIT01738.1};	--	GO:0005634,nucleus; GO:0003700,DNA-binding transcription factor activity; GO:0030674,protein binding, bridging; GO:0008270,zinc ion binding; GO:0007623,circadian rhythm; GO:0009909,regulation of flower development; GO:0006355,regulation of transcription, DNA-templated; GO:0010224,response to UV-B	B-box zinc finger
g31138	C2C2-GATA	TF	C2C2->C2C2-GATA	176	375	1.096	up	LG8	4920564	4923418	-	--	--	--	PREDICTED: GATA transcription factor 8-like [Ipomoea nil]	RecName: Full=GATA transcription factor 8;	--	GATA-4/5/6 transcription factors	GO:0005634,nucleus; GO:0005667,transcription factor complex; GO:0003682,chromatin binding; GO:0003700,DNA-binding transcription factor activity; GO:0000977,RNA polymerase II regulatory region sequence-specific DNA binding; GO:0001085,RNA polymerase II transcription factor binding; GO:0001228,DNA-binding transcription activator activity, RNA polymerase II-specific; GO:0008270,zinc ion binding; GO:…	GATA zinc finger
g31186	Tify	TF	Tify	3549	950	-1.901	down	LG8	5297392	5300025	+	--	--	K13464 jasmonate ZIM domain-containing protein | (RefSeq) JAZ1; jasmonate-zim-domain protein 1 (A)	--	RecName: Full=Protein TIFY 10A; AltName: Full=Jasmonate ZIM domain-containing protein 1;	--	--	GO:0005634,nucleus; GO:0003714,transcription corepressor activity; GO:0042742,defense response to bacterium; GO:0009908,flower development; GO:0009867,jasmonic acid mediated signaling pathway; GO:1903507,negative regulation of nucleic acid-templated transcription; GO:0009555,pollen development; GO:1900067,regulation of cellular response to alkaline pH; GO:0031347,regulation of defense response; G…	tify domain
g31279	AP2/ERF-ERF	TF	AP2/ERF->AP2/ERF-ERF	17218	5782	-1.574	down	LG8	5963971	5965552	+	--	--	K09286 EREBP-like factor | (RefSeq) RAP2.12; related to AP2 12 (A)	--	RecName: Full=Ethylene-responsive transcription factor 1; AltName: Full=Ethylene-responsive element-binding factor 1; Short=EREBP-1; Short=OsEREBP1;	--	--	GO:0005634,nucleus; GO:0003677,DNA binding; GO:0003700,DNA-binding transcription factor activity; GO:0006952,defense response; GO:0006351,transcription, DNA-templated	AP2 domain
g31288	Tify	TF	Tify	15505	2564	-2.596	down	LG8	6009732	6011896	-	--	--	K13464 jasmonate ZIM domain-containing protein | (RefSeq) JAZ6; jasmonate-zim-domain protein 6 (A)	--	RecName: Full=Protein TIFY 11B; AltName: Full=Jasmonate ZIM domain-containing protein 6;	--	--	GO:0005634,nucleus; GO:0003714,transcription corepressor activity; GO:0006952,defense response; GO:1903507,negative regulation of nucleic acid-templated transcription; GO:0031347,regulation of defense response; GO:2000022,regulation of jasmonic acid mediated signaling pathway; GO:0006355,regulation of transcription, DNA-templated; GO:0009753,response to jasmonic acid; GO:0009611,response to wound…	Divergent CCT motif
g31550	WRKY	TF	WRKY	537	36	-3.91	down	LG8	7799209	7801033	-	--	--	K18834 WRKY transcription factor 1 | (RefSeq) ZAP1; zinc-dependent activator protein-1 (A)	PREDICTED: probable WRKY transcription factor 40 [Ipomoea nil]	RecName: Full=Probable WRKY transcription factor 40; AltName: Full=WRKY DNA-binding protein 40;	SubName: Full=Uncharacterized protein {ECO:0000313|EnsemblPlants:Solyc03g116890.2.1};	--	GO:0005634,nucleus; GO:0003700,DNA-binding transcription factor activity; GO:0043565,sequence-specific DNA binding; GO:0044212,transcription regulatory region DNA binding; GO:0042742,defense response to bacterium; GO:0050832,defense response to fungus; GO:0045892,negative regulation of transcription, DNA-templated; GO:0031347,regulation of defense response; GO:0010200,response to chitin; GO:00022…	Protein of unknown function (DUF4527)
g31615	Tify	TF	Tify	824	223	-1.885	down	LG8	8305614	8309277	+	--	--	K13464 jasmonate ZIM domain-containing protein | (RefSeq) JAZ4; jasmonate-zim-domain protein 4 (A)	PREDICTED: protein TIFY 6B isoform X4 [Ipomoea nil]	RecName: Full=Protein TIFY 6A; AltName: Full=Jasmonate ZIM domain-containing protein 4;	SubName: Full=JAZ3 {ECO:0000313|EMBL:ALI87031.1};	--	GO:0005634,nucleus; GO:0003714,transcription corepressor activity; GO:0006952,defense response; GO:1903507,negative regulation of nucleic acid-templated transcription; GO:0031347,regulation of defense response; GO:2000022,regulation of jasmonic acid mediated signaling pathway; GO:0006355,regulation of transcription, DNA-templated; GO:0009611,response to wounding; GO:0006351,transcription, DNA-tem…	Divergent CCT motif
g31985	SBP	TF	SBP	101	221	1.126	up	LG8	11361558	11372809	+	--	--	--	PREDICTED: squamosa promoter-binding-like protein 6 isoform X2 [Ipomoea nil]	RecName: Full=Squamosa promoter-binding-like protein 6;	SubName: Full=Squamosa promoter binding protein like 6 {ECO:0000313|EMBL:AOO19736.1};	--	GO:0005634,nucleus; GO:0003677,DNA binding; GO:0003700,DNA-binding transcription factor activity; GO:0046872,metal ion binding; GO:0042742,defense response to bacterium; GO:0010468,regulation of gene expression; GO:0006355,regulation of transcription, DNA-templated; GO:0006351,transcription, DNA-templated	SBP domain
g31999	SBP	TF	SBP	73	176	1.261	up	LG8	11481151	11485846	+	--	--	--	PREDICTED: squamosa promoter-binding-like protein 6 isoform X2 [Ipomoea nil]	RecName: Full=Squamosa promoter-binding-like protein 6;	SubName: Full=Squamosa promoter binding protein NtabSPL6-4 {ECO:0000313|EMBL:BAU51035.1}; SubName: Full=squamosa promoter-binding-like protein 6 {ECO:0000313|RefSeq:XP_016449891.1, ECO:0000313|RefSeq:XP_016449892.1};	--	GO:0005634,nucleus; GO:0003677,DNA binding; GO:0003700,DNA-binding transcription factor activity; GO:0046872,metal ion binding; GO:0042742,defense response to bacterium; GO:0010468,regulation of gene expression; GO:0006355,regulation of transcription, DNA-templated; GO:0006351,transcription, DNA-templated	SBP domain
g33167	FAR1	TF	FAR1	32	3	-3.517	down	LG8	20462181	20470869	-	--	--	K17604 zinc finger SWIM domain-containing protein 3 | (RefSeq) FRS8; FAR1-related sequence 8 (A)	PREDICTED: protein FAR1-RELATED SEQUENCE 5-like [Ipomoea nil]	RecName: Full=Protein FAR1-RELATED SEQUENCE 5;	SubName: Full=Uncharacterized protein {ECO:0000313|EnsemblPlants:TRIAE_CS42_3B_TGACv1_224427_AA0796660.2};	--	GO:0005634,nucleus; GO:0008270,zinc ion binding; GO:0006355,regulation of transcription, DNA-templated	FAR1 DNA-binding domain
g33626	MYB	TF	MYB->MYB	36	103	1.511	up	LG8	24324365	24326706	+	--	--	K09422 transcription factor MYB, plant | (RefSeq) MYB86; myb domain protein 86 (A)	PREDICTED: myb-related protein Hv33-like [Ipomoea nil]	RecName: Full=Transcription factor MYB86; AltName: Full=Myb homolog 4; Short=AtMyb4; AltName: Full=Myb-related protein 86; Short=AtMYB86;	SubName: Full=Transcription factor MYB32 {ECO:0000313|EMBL:PHT53930.1};	Transcription factor, Myb superfamily	GO:0005634,nucleus; GO:0000981,DNA-binding transcription factor activity, RNA polymerase II-specific; GO:0043565,sequence-specific DNA binding; GO:0001135,RNA polymerase II transcription regulator recruiting activity; GO:0044212,transcription regulatory region DNA binding; GO:0030154,cell differentiation; GO:0006357,regulation of transcription by RNA polymerase II; GO:0006351,transcription, DNA-t…	Myb-like DNA-binding domain
g33866	bHLH	TF	bHLH	1349	4699	1.8	up	LG8	26153444	26159786	-	--	--	K12126 phytochrome-interacting factor 3 | (RefSeq) PIF3; phytochrome interacting factor 3 (A)	PREDICTED: transcription factor bHLH79-like [Ipomoea nil]	RecName: Full=Transcription factor bHLH79; AltName: Full=Basic helix-loop-helix protein 79; Short=AtbHLH79; Short=bHLH 79; AltName: Full=Transcription factor EN 81; AltName: Full=bHLH transcription factor bHLH079;	SubName: Full=transcription factor bHLH79 isoform X1 {ECO:0000313|RefSeq:XP_009784039.1};	--	GO:0005634,nucleus; GO:0003700,DNA-binding transcription factor activity; GO:0046983,protein dimerization activity; GO:0043565,sequence-specific DNA binding; GO:0006355,regulation of transcription, DNA-templated; GO:0006351,transcription, DNA-templated	Helix-loop-helix DNA-binding domain
g33888	bHLH	TF	bHLH	364	77	-2.248	down	LG8	26360384	26362593	+	--	--	K13422 transcription factor MYC2 | (RefSeq) MYC2; Basic helix-loop-helix (bHLH) DNA-binding family protein (A)	PREDICTED: transcription factor MYC2-like isoform X2 [Ipomoea nil]	RecName: Full=Transcription factor bHLH14; AltName: Full=Basic helix-loop-helix protein 14; Short=AtbHLH14; Short=bHLH 14; AltName: Full=Transcription factor EN 33; AltName: Full=bHLH transcription factor bHLH014;	SubName: Full=Basic helix-loop-helix DNA-binding family protein {ECO:0000313|EMBL:EOX95614.1};	--	GO:0005737,cytoplasm; GO:0005634,nucleus; GO:0003677,DNA binding; GO:0003700,DNA-binding transcription factor activity; GO:0046983,protein dimerization activity; GO:0010629,negative regulation of gene expression; GO:0006355,regulation of transcription, DNA-templated; GO:0006351,transcription, DNA-templated	Helix-loop-helix DNA-binding domain
g33906	MYB-related	TF	MYB->MYB-related	522	146	-1.841	down	LG8	26511196	26513108	+	--	--	K12134 circadian clock associated 1 | (RefSeq) CCA1; circadian clock associated 1 (A)	PREDICTED: protein LHY isoform X1 [Solanum tuberosum]	RecName: Full=Protein CCA1 {ECO:0000303|PubMed:9144958}; AltName: Full=MYB-related transcription factor CCA1 {ECO:0000303|PubMed:9144958}; AltName: Full=Protein CIRCADIAN CLOCK ASSOCIATED 1 {ECO:0000303|PubMed:9144958};	SubName: Full=Uncharacterized protein {ECO:0000313|EnsemblPlants:PGSC0003DMT400029394};	Zuotin and related molecular chaperones (DnaJ superfamily), contains DNA-binding domains	GO:0005634,nucleus; GO:0003677,DNA binding; GO:0003700,DNA-binding transcription factor activity; GO:0043565,sequence-specific DNA binding; GO:0007623,circadian rhythm; GO:0048574,long-day photoperiodism, flowering; GO:0042754,negative regulation of circadian rhythm; GO:0045892,negative regulation of transcription, DNA-templated; GO:0045893,positive regulation of transcription, DNA-templated; GO:…	Myb DNA-binding like
g34250	MADS-M-type	TF	MADS->MADS-M-type	124	273	1.137	up	LG9	1581991	1585012	-	--	--	K09264 MADS-box transcription factor, plant | (RefSeq) AGL44; AGAMOUS-like 44 (A)	PREDICTED: MADS-box protein SVP-like isoform X3 [Ipomoea nil]	RecName: Full=MADS-box protein AGL24; AltName: Full=Protein AGAMOUS-LIKE 24;	SubName: Full=MADS-box transcription factor MPF1 {ECO:0000313|EMBL:ACH53558.1};	MADS box transcription factor	GO:0005737,cytoplasm; GO:0005634,nucleus; GO:0003700,DNA-binding transcription factor activity; GO:0046982,protein heterodimerization activity; GO:0000977,RNA polymerase II regulatory region sequence-specific DNA binding; GO:0043565,sequence-specific DNA binding; GO:0030154,cell differentiation; GO:0048438,floral whorl development; GO:0010077,maintenance of inflorescence meristem identity; GO:004…	K-box region
g34290	NAC	TF	NAC	179	78	-1.197	down	LG9	1778418	1779828	+	--	--	--	PREDICTED: NAC domain-containing protein 104-like [Ipomoea nil]	RecName: Full=NAC domain-containing protein 104 {ECO:0000305}; Short=ANAC104 {ECO:0000303|PubMed:15029955}; AltName: Full=Protein XYLEM NAC DOMAIN 1 {ECO:0000312|EMBL:AED97913.1};	SubName: Full=NAC transcription factor 25 isoform X1 {ECO:0000313|RefSeq:XP_009762857.1};	--	GO:0005634,nucleus; GO:0003677,DNA binding; GO:0003700,DNA-binding transcription factor activity; GO:0043067,regulation of programmed cell death; GO:0048367,shoot system development; GO:0006351,transcription, DNA-templated; GO:0010089,xylem development	No apical meristem (NAM) protein
g34305	bZIP	TF	bZIP	2393	1184	-1.016	down	LG9	1872461	1878103	-	--	--	K14432 ABA responsive element binding factor | (RefSeq) GBF4; G-box binding factor 4 (A)	PREDICTED: ABSCISIC ACID-INSENSITIVE 5-like protein 7 [Ipomoea nil]	RecName: Full=G-box-binding factor 4; AltName: Full=bZIP transcription factor 40; Short=AtbZIP40;	SubName: Full=Uncharacterized protein {ECO:0000313|EMBL:PHT98583.1};	--	GO:0005634,nucleus; GO:0003677,DNA binding; GO:0003700,DNA-binding transcription factor activity; GO:0043565,sequence-specific DNA binding; GO:0006351,transcription, DNA-templated	Basic region leucine zipper
g3436	MYB	TF	MYB->MYB	1521	537	-1.502	down	LG1	24513965	24516315	-	--	--	K12134 circadian clock associated 1 | (RefSeq) CCA1; circadian clock associated 1 (A)	PREDICTED: transcription factor DIVARICATA-like [Ipomoea nil]	RecName: Full=Transcription factor SRM1 {ECO:0000305}; AltName: Full=Myb-related protein SRM1 {ECO:0000305}; AltName: Full=Protein SALT-RELATED MYB 1 {ECO:0000303|PubMed:26243618};	SubName: Full=transcription factor DIVARICATA-like {ECO:0000313|RefSeq:XP_009796939.1};	Zuotin and related molecular chaperones (DnaJ superfamily), contains DNA-binding domains	GO:0005634,nucleus; GO:0003677,DNA binding; GO:0003700,DNA-binding transcription factor activity; GO:0009738,abscisic acid-activated signaling pathway; GO:1901001,negative regulation of response to salt stress; GO:0010116,positive regulation of abscisic acid biosynthetic process; GO:1905615,positive regulation of developmental vegetative growth; GO:0045893,positive regulation of transcription, DN…	Myb-like DNA-binding domain
g34420	WRKY	TF	WRKY	69	8	-3.203	down	LG9	2520439	2524041	+	--	--	K13424 WRKY transcription factor 33 | (RefSeq) WRKY33; WRKY DNA-binding protein 33 (A)	PREDICTED: probable WRKY transcription factor 31 isoform X1 [Ipomoea nil]	RecName: Full=WRKY transcription factor 6 {ECO:0000303|PubMed:11722756}; AltName: Full=WRKY DNA-binding protein 6 {ECO:0000303|PubMed:11722756}; Short=AtWRKY6 {ECO:0000303|PubMed:11722756};	SubName: Full=Wrky transcription factor 6 {ECO:0000313|EMBL:OIT08408.1};	--	GO:0005634,nucleus; GO:0003700,DNA-binding transcription factor activity; GO:0043565,sequence-specific DNA binding; GO:0044212,transcription regulatory region DNA binding; GO:0080169,cellular response to boron-containing substance deprivation; GO:0016036,cellular response to phosphate starvation; GO:0009873,ethylene-activated signaling pathway; GO:0045892,negative regulation of transcription, DNA…	Exonuclease VII, large subunit
g35012	B3	TF	B3->B3	470	10	-5.543	down	LG9	6740074	6743517	-	--	--	K09287 RAV-like factor | (RefSeq) RAV2; related to ABI3/VP1 2 (A)	PREDICTED: B3 domain-containing protein Os03g0120900-like [Ipomoea nil]	RecName: Full=B3 domain-containing protein Os04g0581400;	--	--	GO:0005634,nucleus; GO:0003677,DNA binding; GO:0006355,regulation of transcription, DNA-templated; GO:0006351,transcription, DNA-templated	B3 DNA binding domain
g35053	MYB	TF	MYB->MYB	23	1	-4.462	down	LG9	7056893	7058417	+	--	--	K09422 transcription factor MYB, plant | (RefSeq) MYB3; myb domain protein 3 (A)	--	RecName: Full=Transcription factor MYB3; AltName: Full=Myb-related protein 3; Short=AtMYB3;	--	Transcription factor, Myb superfamily	GO:0005634,nucleus; GO:0003700,DNA-binding transcription factor activity; GO:0000981,DNA-binding transcription factor activity, RNA polymerase II-specific; GO:0043565,sequence-specific DNA binding; GO:0001135,RNA polymerase II transcription regulator recruiting activity; GO:0044212,transcription regulatory region DNA binding; GO:0030154,cell differentiation; GO:0009800,cinnamic acid biosynthetic …	Myb-like DNA-binding domain
g35092	AP2/ERF-ERF	TF	AP2/ERF->AP2/ERF-ERF	34	6	-2.417	down	LG9	7338408	7339644	+	--	--	K09286 EREBP-like factor | (RefSeq) RAP2.4; related to AP2 4 (A)	--	RecName: Full=Ethylene-responsive transcription factor ERF061;	--	--	GO:0005634,nucleus; GO:0003677,DNA binding; GO:0003700,DNA-binding transcription factor activity; GO:0009873,ethylene-activated signaling pathway; GO:0010200,response to chitin; GO:0006351,transcription, DNA-templated	AP2 domain
g35099	HMG	TR	HMG	173	83	-1.06	down	LG9	7375429	7378110	-	--	--	K09273 upstream-binding transcription factor | (RefSeq) 3xHMG-box1; HMG (high mobility group) box protein (A)	--	RecName: Full=High mobility group B protein 13; AltName: Full=Nucleosome/chromatin assembly factor group D 13;	--	HMG box-containing protein	GO:0005634,nucleus; GO:0003677,DNA binding; GO:0003700,DNA-binding transcription factor activity	CHDNT (NUC034) domain
g35139	AP2/ERF-ERF	TF	AP2/ERF->AP2/ERF-ERF	60	161	1.415	up	LG9	7625074	7626901	-	--	--	K09286 EREBP-like factor | (RefSeq) ERF10; ERF domain protein 10 (A)	--	RecName: Full=Ethylene-responsive transcription factor CRF4; AltName: Full=Protein CYTOKININ RESPONSE FACTOR 4;	--	--	GO:0005737,cytoplasm; GO:0005634,nucleus; GO:0003677,DNA binding; GO:0003700,DNA-binding transcription factor activity; GO:0009736,cytokinin-activated signaling pathway; GO:0009873,ethylene-activated signaling pathway; GO:0048366,leaf development; GO:0006351,transcription, DNA-templated	AP2 domain
g35141	Others	TR	Others	1245	3002	1.269	up	LG9	7643270	7649171	-	--	--	K12135 zinc finger protein CONSTANS | (RefSeq) CO; B-box type zinc finger protein with CCT domain-containing protein (A)	--	RecName: Full=Zinc finger protein CONSTANS {ECO:0000303|PubMed:7697715};	--	--	GO:0005634,nucleus; GO:0003677,DNA binding; GO:0003700,DNA-binding transcription factor activity; GO:0008270,zinc ion binding; GO:0030154,cell differentiation; GO:0010018,far-red light signaling pathway; GO:0009908,flower development; GO:0009909,regulation of flower development; GO:0010218,response to far red light; GO:0006351,transcription, DNA-templated	CCT motif
g35276	GNAT	TR	GNAT	265	69	-1.943	down	LG9	8693109	8697283	+	--	--	--	--	RecName: Full=Probable N-acetyltransferase HLS1; EC=2.3.1.-; AltName: Full=Protein CONSTITUTIVE PHOTOMORPHOGENIC 3; AltName: Full=Protein HOOKLESS 1; AltName: Full=Protein UNUSUAL SUGAR RESPONSE 2;	--	--	GO:0008080,N-acetyltransferase activity; GO:0016747,transferase activity, transferring acyl groups other than amino-acyl groups; GO:0009734,auxin-activated signaling pathway; GO:0009640,photomorphogenesis; GO:0006473,protein acetylation; GO:0040008,regulation of growth; GO:0009723,response to ethylene; GO:0009826,unidimensional cell growth	Acetyltransferase (GNAT) family
g35504	Tify	TF	Tify	936	452	-1.051	down	LG9	10397664	10401558	-	--	--	K13464 jasmonate ZIM domain-containing protein | (RefSeq) JAZ4; jasmonate-zim-domain protein 4 (A)	PREDICTED: protein TIFY 6B-like isoform X1 [Ipomoea nil]	RecName: Full=Protein TIFY 6A; AltName: Full=Jasmonate ZIM domain-containing protein 4;	SubName: Full=protein TIFY 6B-like isoform X2 {ECO:0000313|RefSeq:XP_016439113.1};	--	GO:0005634,nucleus; GO:0003714,transcription corepressor activity; GO:0006952,defense response; GO:1903507,negative regulation of nucleic acid-templated transcription; GO:0031347,regulation of defense response; GO:2000022,regulation of jasmonic acid mediated signaling pathway; GO:0006355,regulation of transcription, DNA-templated; GO:0009611,response to wounding; GO:0006351,transcription, DNA-tem…	Divergent CCT motif
g36329	GARP-G2-like	TF	GARP->GARP-G2-like	371	101	-1.89	down	LG9	16700813	16703452	-	--	--	K14491 two-component response regulator ARR-B family | (RefSeq) RR1; response regulator 1 (A)	PREDICTED: myb family transcription factor EFM-like [Ipomoea nil]	RecName: Full=Transcription factor HHO3 {ECO:0000305}; AltName: Full=MYB-domain transcription factor HHO3 {ECO:0000305}; AltName: Full=Protein HRS1 HOMOLOG 3 {ECO:0000305};	SubName: Full=Uncharacterized protein {ECO:0000313|EMBL:PIN09501.1};	--	GO:0005634,nucleus; GO:0003677,DNA binding; GO:0003700,DNA-binding transcription factor activity; GO:0006355,regulation of transcription, DNA-templated; GO:0006351,transcription, DNA-templated	C-terminal domain on Strawberry notch homologue
g36835	MYB-related	TF	MYB->MYB-related	393	174	-1.179	down	LG9	20505403	20508392	-	--	--	--	PREDICTED: uncharacterized protein LOC109169061 [Ipomoea nil]	RecName: Full=Transcription factor KUA1 {ECO:0000303|PubMed:24806884}; AltName: Full=Myb-related protein H {ECO:0000303|PubMed:23888064}; Short=AtMYBH {ECO:0000303|PubMed:23888064}; Short=AtMYBS3 {ECO:0000303|PubMed:25920996}; Short=MYBS3-homolg protein {ECO:0000303|PubMed:25920996}; AltName: Full=Protein KUODA1 {ECO:0000303|PubMed:24806884};	SubName: Full=transcription factor MYB1R1-like isoform X2 {ECO:0000313|RefSeq:XP_016468550.1};	--	GO:0005634,nucleus; GO:0003700,DNA-binding transcription factor activity; GO:0000976,transcription regulatory region sequence-specific DNA binding; GO:0008270,zinc ion binding; GO:0010252,auxin homeostasis; GO:0048527,lateral root development; GO:0048366,leaf development; GO:0010150,leaf senescence; GO:2000469,negative regulation of peroxidase activity; GO:0000122,negative regulation of transcrip…	Myb-like DNA-binding domain
g36877	TRAF	TR	TRAF	1216	2479	1.028	up	LG9	20854376	20859943	-	--	--	K14508 regulatory protein NPR1 | (RefSeq) NPR3; NPR1-like protein 3 (A)	PREDICTED: regulatory protein NPR3 isoform X1 [Ipomoea nil]	RecName: Full=Regulatory protein NPR3; AltName: Full=BTB/POZ domain-containing protein NPR3;	SubName: Full=regulatory protein NPR3-like {ECO:0000313|RefSeq:XP_016442273.1};	FOG: Ankyrin repeat	GO:0005737,cytoplasm; GO:0005634,nucleus; GO:0019005,SCF ubiquitin ligase complex; GO:1901149,salicylic acid binding; GO:0031625,ubiquitin protein ligase binding; GO:0009816,defense response to bacterium, incompatible interaction; GO:0009817,defense response to fungus, incompatible interaction; GO:0080185,effector dependent induction by symbiont of host immune response; GO:0043161,proteasome-medi…	Ankyrin repeats (many copies)
g37258	Tify	TF	Tify	42	0	-7.802	down	LG9	24244160	24245078	-	--	--	--	--	RecName: Full=Protein TIFY 5A {ECO:0000303|PubMed:17499004}; AltName: Full=Jasmonate ZIM domain-containing protein 8 {ECO:0000303|PubMed:17637675};	--	--	GO:0005634,nucleus; GO:0003714,transcription corepressor activity; GO:0006952,defense response; GO:1903507,negative regulation of nucleic acid-templated transcription; GO:0031347,regulation of defense response; GO:2000022,regulation of jasmonic acid mediated signaling pathway; GO:0006355,regulation of transcription, DNA-templated; GO:0009611,response to wounding; GO:0006351,transcription, DNA-tem…	Divergent CCT motif
g38332	GARP-ARR-B	TF	GARP->GARP-ARR-B	183	41	-2.146	down	LG10	1157844	1167740	+	--	--	K14491 two-component response regulator ARR-B family | (RefSeq) RR18; response regulator 18 (A)	uncharacterized protein LOC110643835 [Hevea brasiliensis]	RecName: Full=Retrovirus-related Pol polyprotein from transposon RE1; AltName: Full=Retro element 1 {ECO:0000303|PubMed:10689195}; Short=AtRE1 {ECO:0000303|PubMed:10689195}; Includes: RecName: Full=Protease RE1; EC=3.4.23.-; Includes: RecName: Full=Reverse transcriptase RE1; EC=2.7.7.49; Includes: RecName: Full=Endonuclease RE1;	SubName: Full=Uncharacterized protein {ECO:0000313|EMBL:CAN81001.1};	FOG: Transposon-encoded proteins with TYA, reverse transcriptase, integrase domains in various combinations	GO:0004190,aspartic-type endopeptidase activity; GO:0004519,endonuclease activity; GO:0046872,metal ion binding; GO:0003676,nucleic acid binding; GO:0003964,RNA-directed DNA polymerase activity; GO:0015074,DNA integration; GO:0006310,DNA recombination	gag-polypeptide of LTR copia-type
g38339	NAC	TF	NAC	54	158	1.542	up	LG10	1212501	1215414	+	--	--	--	PREDICTED: NAC transcription factor 29-like [Ipomoea nil]	RecName: Full=NAC domain-containing protein 71 {ECO:0000303|PubMed:15029955}; Short=ANAC071 {ECO:0000303|PubMed:15029955};	SubName: Full=Uncharacterized protein {ECO:0000313|EnsemblPlants:Solyc08g077110.2.1};	--	GO:0005634,nucleus; GO:0003700,DNA-binding transcription factor activity; GO:0043565,sequence-specific DNA binding; GO:0008283,cell proliferation; GO:0071365,cellular response to auxin stimulus; GO:0006351,transcription, DNA-templated	No apical meristem (NAM) protein
g38360	PLATZ	TF	PLATZ	9603	3079	-1.641	down	LG10	1378996	1380686	+	--	--	--	PREDICTED: uncharacterized protein LOC109152966 [Ipomoea nil]	--	SubName: Full=Uncharacterized protein {ECO:0000313|EnsemblPlants:PGSC0003DMT400045164};	--	--	PLATZ transcription factor
g38373	Jumonji	TR	Jumonji	165	44	-1.916	down	LG10	1488016	1494547	+	--	--	K11446 histone demethylase JARID1 [EC:1.14.11.-] | (RefSeq) PKDM7D; Transcription factor jumonji (jmj) family protein / zinc finger (C5HC2 type) family protein (A)	PREDICTED: lysine-specific demethylase JMJ706-like isoform X1 [Ipomoea nil]	RecName: Full=Lysine-specific demethylase JMJ706; EC=1.14.11.-; AltName: Full=Jumonji domain-containing protein 706; AltName: Full=Lysine-specific histone demethylase JMJ706; AltName: Full=Protein JUMONJI 706;	SubName: Full=Lysine-specific demethylase {ECO:0000313|EMBL:PHT58609.1}; Flags: Fragment;	DNA-binding protein jumonji/RBP2/SMCY, contains JmjC domain	GO:0000792,heterochromatin; GO:0005634,nucleus; GO:0051213,dioxygenase activity; GO:0032454,histone demethylase activity (H3-K9 specific); GO:0046872,metal ion binding; GO:0048439,flower morphogenesis; GO:0045815,positive regulation of gene expression, epigenetic; GO:0006355,regulation of transcription, DNA-templated; GO:0006351,transcription, DNA-templated	C5HC2 zinc finger
g38640	TCP	TF	TCP	75	167	1.144	up	LG10	3188110	3191914	+	--	--	K16221 transcription factor TCP21 (protein CCA1 HIKING EXPEDITION) | (RefSeq) TCP11; TCP family transcription factor (A)	--	RecName: Full=Transcription factor TCP20;	SubName: Full=Uncharacterized protein {ECO:0000313|EMBL:EXB40331.1};	--	GO:0005634,nucleus; GO:0003677,DNA binding; GO:0003700,DNA-binding transcription factor activity; GO:0000987,proximal promoter sequence-specific DNA binding; GO:0043565,sequence-specific DNA binding; GO:0009653,anatomical structure morphogenesis; GO:0006351,transcription, DNA-templated	TCP family transcription factor
g38641	C2H2	TF	C2H2	103	343	1.735	up	LG10	3193440	3198309	+	--	--	--	--	RecName: Full=Protein indeterminate-domain 1 {ECO:0000303|PubMed:16784536}; AltName: Full=Protein ENHYDROUS {ECO:0000303|PubMed:21571950};	SubName: Full=Zinc finger protein MAGPIE {ECO:0000313|EMBL:KYP37847.1}; EC=3.1.26.5 {ECO:0000313|EMBL:KYP37847.1};	FOG: Zn-finger	GO:0005634,nucleus; GO:0003700,DNA-binding transcription factor activity; GO:0046872,metal ion binding; GO:0044212,transcription regulatory region DNA binding; GO:0009937,regulation of gibberellic acid mediated signaling pathway; GO:0010029,regulation of seed germination; GO:0006355,regulation of transcription, DNA-templated; GO:0010431,seed maturation; GO:0006351,transcription, DNA-templated	Zinc-finger double-stranded RNA-binding
g38746	C2H2	TF	C2H2	441	74	-2.577	down	LG10	3898518	3899432	-	--	--	--	--	RecName: Full=Zinc finger protein ZAT10; AltName: Full=Salt-tolerance zinc finger;	SubName: Full=Zinc finger DNA-binding protein {ECO:0000313|EMBL:CAF74935.1};	FOG: Zn-finger	GO:0005634,nucleus; GO:0003700,DNA-binding transcription factor activity; GO:0046872,metal ion binding; GO:0043565,sequence-specific DNA binding; GO:0035264,multicellular organism growth; GO:0045892,negative regulation of transcription, DNA-templated; GO:0010117,photoprotection; GO:0015979,photosynthesis; GO:0009737,response to abscisic acid; GO:0010200,response to chitin; GO:0009409,response to …	Zinc finger, C2H2 type
g388	bZIP	TF	bZIP	929	2343	1.335	up	LG1	2060823	2061815	+	--	--	K14432 ABA responsive element binding factor | (RefSeq) ABI5; Basic-leucine zipper (bZIP) transcription factor family protein (A)	--	RecName: Full=bZIP transcription factor 11 {ECO:0000305}; Short=AtbZIP11 {ECO:0000303|PubMed:11906833}; AltName: Full=G-box-binding factor 6 {ECO:0000303|Ref.3}; AltName: Full=bZIP transcription factor ATB2 {ECO:0000303|PubMed:9620274};	SubName: Full=Uncharacterized protein {ECO:0000313|EnsemblPlants:PGSC0003DMT400009068};	--	GO:0005634,nucleus; GO:0003700,DNA-binding transcription factor activity; GO:0046982,protein heterodimerization activity; GO:0043565,sequence-specific DNA binding; GO:0017148,negative regulation of translation; GO:0045893,positive regulation of transcription, DNA-templated; GO:0009744,response to sucrose; GO:0080149,sucrose induced translational repression; GO:0006351,transcription, DNA-templated	Basic region leucine zipper
g38859	SRS	TF	SRS	125	358	1.515	up	LG10	4737345	4740624	-	--	--	--	--	RecName: Full=Protein SHORT INTERNODES;	SubName: Full=Uncharacterized protein {ECO:0000313|EMBL:EPS68333.1}; Flags: Fragment;	--	GO:0005634,nucleus; GO:0003677,DNA binding; GO:0003700,DNA-binding transcription factor activity; GO:0046872,metal ion binding; GO:0046982,protein heterodimerization activity; GO:0009851,auxin biosynthetic process; GO:0009734,auxin-activated signaling pathway; GO:0009740,gibberellic acid mediated signaling pathway; GO:0007275,multicellular organism development; GO:0009938,negative regulation of g…	Domain of unknown function (DUF702)
g38960	bHLH	TF	bHLH	920	49	-4.204	down	LG10	5541266	5547836	-	--	--	--	--	RecName: Full=Transcription factor bHLH93; AltName: Full=Basic helix-loop-helix protein 93; Short=AtbHLH93; Short=bHLH 93; AltName: Full=Transcription factor EN 47; AltName: Full=bHLH transcription factor bHLH093;	SubName: Full=transcription factor bHLH93-like {ECO:0000313|RefSeq:XP_016490472.1};	--	GO:0005634,nucleus; GO:0003677,DNA binding; GO:0003700,DNA-binding transcription factor activity; GO:0046983,protein dimerization activity; GO:0045487,gibberellin catabolic process; GO:0007275,multicellular organism development; GO:0010371,regulation of gibberellin biosynthetic process; GO:0006351,transcription, DNA-templated	Helix-loop-helix DNA-binding domain
g39034	AUX/IAA	TR	AUX/IAA	2091	884	-1.241	down	LG10	6134523	6138092	-	--	--	K14484 auxin-responsive protein IAA | (RefSeq) PAP2; phytochrome-associated protein 2 (A)	--	RecName: Full=Auxin-responsive protein IAA27; AltName: Full=Auxin-induced protein 27; AltName: Full=Indoleacetic acid-induced protein 27; AltName: Full=Phytochrome-associated protein 2;	RecName: Full=Auxin-responsive protein {ECO:0000256|RuleBase:RU004549};	--	GO:0005634,nucleus; GO:0003700,DNA-binding transcription factor activity; GO:0009734,auxin-activated signaling pathway; GO:0009733,response to auxin; GO:0006351,transcription, DNA-templated	AUX/IAA family
g39035	AUX/IAA	TR	AUX/IAA	1785	676	-1.399	down	LG10	6142947	6149747	+	--	--	K14484 auxin-responsive protein IAA | (RefSeq) PAP2; phytochrome-associated protein 2 (A)	--	RecName: Full=Auxin-responsive protein IAA27; AltName: Full=Auxin-induced protein 27; AltName: Full=Indoleacetic acid-induced protein 27; AltName: Full=Phytochrome-associated protein 2;	--	--	GO:0005634,nucleus; GO:0003700,DNA-binding transcription factor activity; GO:0009734,auxin-activated signaling pathway; GO:0009733,response to auxin; GO:0006351,transcription, DNA-templated	AUX/IAA family
g39254	MYB	TF	MYB->MYB	257	27	-3.215	down	LG10	7758760	7760323	+	--	--	K09422 transcription factor MYB, plant | (RefSeq) MYB9; myb domain protein 9 (A)	PREDICTED: myb-related protein 308-like [Ipomoea nil]	RecName: Full=Transcription factor MYB3; AltName: Full=Myb-related protein 3; Short=AtMYB3;	SubName: Full=transcription factor MYB3-like {ECO:0000313|RefSeq:XP_016440837.1};	Transcription factor, Myb superfamily	GO:0005634,nucleus; GO:0003700,DNA-binding transcription factor activity; GO:0000981,DNA-binding transcription factor activity, RNA polymerase II-specific; GO:0043565,sequence-specific DNA binding; GO:0001135,RNA polymerase II transcription regulator recruiting activity; GO:0044212,transcription regulatory region DNA binding; GO:0030154,cell differentiation; GO:0009800,cinnamic acid biosynthetic …	Myb-like DNA-binding domain
g39309	GNAT	TR	GNAT	0	17	6.566	up	LG10	8183717	8186018	-	--	--	--	PREDICTED: probable N-acetyltransferase HLS1 [Ipomoea nil]	RecName: Full=Probable N-acetyltransferase HLS1; EC=2.3.1.-; AltName: Full=Protein CONSTITUTIVE PHOTOMORPHOGENIC 3; AltName: Full=Protein HOOKLESS 1; AltName: Full=Protein UNUSUAL SUGAR RESPONSE 2;	SubName: Full=Uncharacterized protein {ECO:0000313|EMBL:PIN25698.1};	--	GO:0008080,N-acetyltransferase activity; GO:0016747,transferase activity, transferring acyl groups other than amino-acyl groups; GO:0009734,auxin-activated signaling pathway; GO:0009640,photomorphogenesis; GO:0006473,protein acetylation; GO:0040008,regulation of growth; GO:0009723,response to ethylene; GO:0009826,unidimensional cell growth	Acetyltransferase (GNAT) domain
g397	C2C2-GATA	TF	C2C2->C2C2-GATA	579	209	-1.475	down	LG1	2151663	2155079	+	--	--	--	PREDICTED: GATA transcription factor 5-like isoform X2 [Ipomoea nil]	RecName: Full=GATA transcription factor 6;	SubName: Full=Uncharacterized protein {ECO:0000313|EnsemblPlants:PGSC0003DMT400009117};	GATA-4/5/6 transcription factors	GO:0005634,nucleus; GO:0005667,transcription factor complex; GO:0003682,chromatin binding; GO:0003700,DNA-binding transcription factor activity; GO:0000977,RNA polymerase II regulatory region sequence-specific DNA binding; GO:0001085,RNA polymerase II transcription factor binding; GO:0001228,DNA-binding transcription activator activity, RNA polymerase II-specific; GO:0008270,zinc ion binding; GO:…	Sporozoite P67 surface antigen
g4006	MYB	TF	MYB->MYB	710	285	-1.318	down	LG1	28881809	28883772	-	--	--	K09422 transcription factor MYB, plant | (RefSeq) MYB6; myb domain protein 6 (A)	PREDICTED: transcription repressor MYB6-like [Ipomoea nil]	RecName: Full=Myb-related protein 330;	SubName: Full=myb-related protein 330-like {ECO:0000313|RefSeq:XP_009767902.1};	Transcription factor, Myb superfamily	GO:0005634,nucleus; GO:0003677,DNA binding; GO:0006355,regulation of transcription, DNA-templated; GO:0006351,transcription, DNA-templated	Myb-like DNA-binding domain
g40811	HB-other	TF	HB->HB-other	196	413	1.077	up	LG10	19399884	19404192	-	--	--	--	--	RecName: Full=Homeobox protein knotted-1-like 6; AltName: Full=Protein KNAT6;	--	Transcription factor MEIS1 and related HOX domain proteins	GO:0005634,nucleus; GO:0003700,DNA-binding transcription factor activity; GO:0043565,sequence-specific DNA binding; GO:0010073,meristem maintenance	Homeodomain
g41215	HB-HD-ZIP	TF	HB->HB-HD-ZIP	2135	178	-3.581	down	LG10	22715935	22717894	-	--	--	K09338 homeobox-leucine zipper protein | (RefSeq) HB-1; homeobox 1 (A)	PREDICTED: homeobox-leucine zipper protein ATHB-54-like [Ipomoea nil]	RecName: Full=Homeobox-leucine zipper protein HAT5; AltName: Full=HD-ZIP protein ATHB-1; AltName: Full=Homeodomain transcription factor ATHB-1; AltName: Full=Homeodomain-leucine zipper protein HAT5; Short=HD-ZIP protein 5;	SubName: Full=homeobox-leucine zipper protein HAT5-like {ECO:0000313|RefSeq:XP_016442143.1};	Transcription factor HEX, contains HOX and HALZ domains	GO:0005634,nucleus; GO:0003700,DNA-binding transcription factor activity; GO:0042803,protein homodimerization activity; GO:0043565,sequence-specific DNA binding; GO:0009965,leaf morphogenesis; GO:0045893,positive regulation of transcription, DNA-templated; GO:0009637,response to blue light; GO:0009651,response to salt stress; GO:0006351,transcription, DNA-templated	Homeobox KN domain
g41404	Others	TR	Others	26	64	1.323	up	LG11	339924	343047	-	--	--	K17263 cullin-associated NEDD8-dissociated protein 1 | (RefSeq) CAND1; cullin-associated and neddylation dissociated (A)	CONSTANS-like protein [Ipomoea nil]	RecName: Full=Cullin-associated NEDD8-dissociated protein 1; AltName: Full=Cullin-associated and neddylation-dissociated protein 1; Short=AtCAND1; AltName: Full=Protein ENHANCER OF TIR1-1 AUXIN RESISTANCE 2; AltName: Full=Protein HEMIVENATA;	SubName: Full=CONSTANS-like protein {ECO:0000313|EMBL:AAG24863.1};	TATA-binding protein-interacting protein	GO:0005618,cell wall; GO:0005829,cytosol; GO:0005634,nucleus; GO:0005886,plasma membrane; GO:0016567,protein ubiquitination; GO:0006355,regulation of transcription, DNA-templated; GO:0009733,response to auxin; GO:0010265,SCF complex assembly; GO:0006351,transcription, DNA-templated; GO:0010228,vegetative to reproductive phase transition of meristem; GO:0010051,xylem and phloem pattern formation	CCT motif
g41755	bZIP	TF	bZIP	5720	897	-2.671	down	LG11	2519849	2521034	-	--	--	K09060 plant G-box-binding factor | (RefSeq) bZIP16; basic region/leucine zipper transcription factor 16 (A)	PREDICTED: bZIP transcription factor 44-like [Ipomoea nil]	RecName: Full=bZIP transcription factor 44 {ECO:0000305}; Short=AtbZIP44 {ECO:0000303|PubMed:11906833};	SubName: Full=BZIP transcription factor family protein {ECO:0000313|EMBL:EEE93884.1};	--	GO:0005634,nucleus; GO:0003700,DNA-binding transcription factor activity; GO:0046982,protein heterodimerization activity; GO:0043565,sequence-specific DNA binding; GO:0044212,transcription regulatory region DNA binding; GO:0009845,seed germination; GO:0006351,transcription, DNA-templated	Autophagy protein 16 (ATG16)
g41806	BES1	TF	BES1	749	307	-1.289	down	LG11	2755205	2757230	-	--	--	K14503 brassinosteroid resistant 1/2 | (RefSeq) BZR1; Brassinosteroid signaling positive regulator (BZR1) family protein (A)	PREDICTED: protein BRASSINAZOLE-RESISTANT 1 [Ipomoea nil]	RecName: Full=Protein BRASSINAZOLE-RESISTANT 1; AltName: Full=Protein BIN2 SUBSTRATE 2;	SubName: Full=Uncharacterized protein {ECO:0000313|EnsemblPlants:Solyc04g079980.2.1};	--	GO:0005829,cytosol; GO:0005634,nucleus; GO:0003677,DNA binding; GO:0003700,DNA-binding transcription factor activity; GO:0009742,brassinosteroid mediated signaling pathway; GO:0045892,negative regulation of transcription, DNA-templated; GO:0048481,plant ovule development; GO:0040008,regulation of growth; GO:0006355,regulation of transcription, DNA-templated; GO:0048316,seed development; GO:000635…	BES1/BZR1 plant transcription factor, N-terminal
g41863	MYB	TF	MYB->MYB	176	509	1.535	up	LG11	3087026	3088020	-	--	--	K09422 transcription factor MYB, plant | (RefSeq) MYB73; myb domain protein 73 (A)	PREDICTED: transcription factor MYB44-like [Ipomoea nil]	RecName: Full=Transcription factor MYB73 {ECO:0000303|PubMed:11597504}; AltName: Full=Myb-related protein 73 {ECO:0000303|PubMed:11597504}; Short=AtMYB73 {ECO:0000303|PubMed:11597504};	SubName: Full=Transcription factor myb44 {ECO:0000313|EMBL:OIT22171.1};	Transcription factor, Myb superfamily	GO:0005634,nucleus; GO:0003700,DNA-binding transcription factor activity; GO:0000981,DNA-binding transcription factor activity, RNA polymerase II-specific; GO:0043565,sequence-specific DNA binding; GO:0001135,RNA polymerase II transcription regulator recruiting activity; GO:0044212,transcription regulatory region DNA binding; GO:0030154,cell differentiation; GO:0019760,glucosinolate metabolic pro…	Myb DNA-binding like
g41910	WRKY	TF	WRKY	2858	934	-1.614	down	LG11	3416624	3418408	-	--	--	K13425 WRKY transcription factor 22 | (RefSeq) WRKY22; WRKY family transcription factor (A)	WRKY1 [Ipomoea batatas]	RecName: Full=Probable WRKY transcription factor 7; AltName: Full=WRKY DNA-binding protein 7;	SubName: Full=WRKY1 {ECO:0000313|EMBL:ACT55331.1};	--	GO:0005634,nucleus; GO:0005516,calmodulin binding; GO:0003700,DNA-binding transcription factor activity; GO:0043565,sequence-specific DNA binding; GO:0006351,transcription, DNA-templated	Plant zinc cluster domain
g41923	MYB	TF	MYB->MYB	86	413	2.265	up	LG11	3484613	3485753	+	--	--	K09422 transcription factor MYB, plant | (RefSeq) MYB70; myb domain protein 70 (A)	PREDICTED: transcription factor MYB44-like [Ipomoea nil]	RecName: Full=Transcription factor MYB73 {ECO:0000303|PubMed:11597504}; AltName: Full=Myb-related protein 73 {ECO:0000303|PubMed:11597504}; Short=AtMYB73 {ECO:0000303|PubMed:11597504};	SubName: Full=MYB family protein {ECO:0000313|EMBL:AIT52202.1};	Transcription factor, Myb superfamily	GO:0005634,nucleus; GO:0003700,DNA-binding transcription factor activity; GO:0000981,DNA-binding transcription factor activity, RNA polymerase II-specific; GO:0043565,sequence-specific DNA binding; GO:0001135,RNA polymerase II transcription regulator recruiting activity; GO:0044212,transcription regulatory region DNA binding; GO:0030154,cell differentiation; GO:0019760,glucosinolate metabolic pro…	SLIDE
g41979	HB-KNOX	TF	HB->HB-KNOX	3291	8065	1.293	up	LG11	3808201	3812564	-	--	--	--	class-I knotted1-like homeobox protein IBKN2 [Ipomoea batatas]	RecName: Full=Homeotic protein knotted-1; Short=TKN1;	SubName: Full=Class-I knotted1-like homeobox protein IBKN2 {ECO:0000313|EMBL:BAF93479.1};	Transcription factor MEIS1 and related HOX domain proteins	GO:0005634,nucleus; GO:0043565,sequence-specific DNA binding; GO:0006355,regulation of transcription, DNA-templated	Homeodomain
g42002	bHLH	TF	bHLH	5129	547	-3.228	down	LG11	4008065	4010036	-	--	--	K13422 transcription factor MYC2 | (RefSeq) MYC2; Basic helix-loop-helix (bHLH) DNA-binding family protein (A)	PREDICTED: transcription factor bHLH93-like [Ipomoea nil]	RecName: Full=Transcription factor bHLH93; AltName: Full=Basic helix-loop-helix protein 93; Short=AtbHLH93; Short=bHLH 93; AltName: Full=Transcription factor EN 47; AltName: Full=bHLH transcription factor bHLH093;	SubName: Full=transcription factor bHLH93-like {ECO:0000313|RefSeq:XP_016490472.1};	--	GO:0005634,nucleus; GO:0003677,DNA binding; GO:0003700,DNA-binding transcription factor activity; GO:0046983,protein dimerization activity; GO:0045487,gibberellin catabolic process; GO:0007275,multicellular organism development; GO:0010371,regulation of gibberellin biosynthetic process; GO:0006351,transcription, DNA-templated	Helix-loop-helix DNA-binding domain
g42011	Tify	TF	Tify	1034	2633	1.349	up	LG11	4099789	4102798	-	--	--	K12128 pseudo-response regulator 9 | (RefSeq) PRR9; pseudo-response regulator 9 (A)	PREDICTED: GATA transcription factor 19-like [Ipomoea nil]	RecName: Full=GATA transcription factor 24; AltName: Full=Protein TIFY 2B; AltName: Full=ZIM-like 1 protein;	SubName: Full=Uncharacterized protein {ECO:0000313|EMBL:OAY51116.1};	GATA-4/5/6 transcription factors	GO:0005634,nucleus; GO:0005667,transcription factor complex; GO:0003682,chromatin binding; GO:0000977,RNA polymerase II regulatory region sequence-specific DNA binding; GO:0001085,RNA polymerase II transcription factor binding; GO:0001228,DNA-binding transcription activator activity, RNA polymerase II-specific; GO:0008270,zinc ion binding; GO:0030154,cell differentiation	Divergent CCT motif
g42098	bHLH	TF	bHLH	2487	399	-2.638	down	LG11	4651216	4653177	-	--	--	K20558 transcription factor SPEECHLESS | (RefSeq) SPCH; basic helix-loop-helix (bHLH) DNA-binding superfamily protein (A)	PREDICTED: transcription factor bHLH96-like [Ipomoea nil]	RecName: Full=Transcription factor bHLH96; AltName: Full=Basic helix-loop-helix protein 96; Short=AtbHLH96; Short=bHLH 96; AltName: Full=Transcription factor EN 15; AltName: Full=bHLH transcription factor bHLH096;	SubName: Full=Uncharacterized protein {ECO:0000313|EnsemblPlants:Solyc04g074810.2.1};	--	GO:0005634,nucleus; GO:0003677,DNA binding; GO:0003700,DNA-binding transcription factor activity; GO:0046983,protein dimerization activity; GO:0006351,transcription, DNA-templated	Helix-loop-helix DNA-binding domain
g42120	AP2/ERF-ERF	TF	AP2/ERF->AP2/ERF-ERF	301	72	-2.074	down	LG11	4796934	4800644	+	--	--	K09286 EREBP-like factor | (RefSeq) RAP2.4; related to AP2 4 (A)	PREDICTED: ethylene-responsive transcription factor RAP2-13-like [Ipomoea nil]	RecName: Full=Ethylene-responsive transcription factor RAP2-4; AltName: Full=Ethylene-responsive transcription factor ERF059; AltName: Full=Protein RELATED TO APETALA2 4;	SubName: Full=ERF transcription factor 01 {ECO:0000313|EMBL:AHB33872.1};	--	GO:0005634,nucleus; GO:0003677,DNA binding; GO:0003700,DNA-binding transcription factor activity; GO:0043565,sequence-specific DNA binding; GO:0071472,cellular response to salt stress; GO:0009736,cytokinin-activated signaling pathway; GO:0009873,ethylene-activated signaling pathway; GO:0045595,regulation of cell differentiation; GO:0009409,response to cold; GO:0009416,response to light stimulus; …	AP2 domain
g42128	AP2/ERF-ERF	TF	AP2/ERF->AP2/ERF-ERF	360	101	-1.84	down	LG11	4878283	4880379	-	--	--	K09286 EREBP-like factor | (RefSeq) RAP2.4; related to AP2 4 (A)	PREDICTED: ethylene-responsive transcription factor RAP2-13-like [Ipomoea nil]	RecName: Full=Ethylene-responsive transcription factor RAP2-4; AltName: Full=Ethylene-responsive transcription factor ERF059; AltName: Full=Protein RELATED TO APETALA2 4;	SubName: Full=ethylene-responsive transcription factor RAP2-4-like {ECO:0000313|RefSeq:XP_016507154.1};	--	GO:0005634,nucleus; GO:0003677,DNA binding; GO:0003700,DNA-binding transcription factor activity; GO:0043565,sequence-specific DNA binding; GO:0071472,cellular response to salt stress; GO:0009736,cytokinin-activated signaling pathway; GO:0009873,ethylene-activated signaling pathway; GO:0045595,regulation of cell differentiation; GO:0009409,response to cold; GO:0009416,response to light stimulus; …	AP2 domain
g42209	HMG	TR	HMG	310	64	-2.267	down	LG11	5341712	5343856	-	--	--	K10802 high mobility group protein B1 | (RefSeq) HMGB1; high mobility group B1 (A)	--	RecName: Full=High mobility group B protein 7; AltName: Full=Nucleosome/chromatin assembly factor group D 07; Short=Nucleosome/chromatin assembly factor group D 7; AltName: Full=Protein NUCLEAR FUSION DEFECTIVE 7 {ECO:0000303|PubMed:16698901};	SubName: Full=High mobility group b protein 7 {ECO:0000313|EMBL:OIT00729.1};	HMG box-containing protein	GO:0005634,nucleus; GO:0003677,DNA binding; GO:0003700,DNA-binding transcription factor activity; GO:0000741,karyogamy; GO:0010197,polar nucleus fusion	HMG-box domain
g42238	C2C2-Dof	TF	C2C2->C2C2-Dof	68	3	-4.33	down	LG11	5562623	5563744	+	--	--	K16222 Dof zinc finger protein DOF5.5 | (RefSeq) CDF1; cycling DOF factor 1 (A)	--	RecName: Full=Dof zinc finger protein DOF3.5; Short=AtDOF3.5;	SubName: Full=Uncharacterized protein {ECO:0000313|EMBL:CDP18281.1};	--	GO:0005634,nucleus; GO:0003677,DNA binding; GO:0003700,DNA-binding transcription factor activity; GO:0046872,metal ion binding; GO:0006355,regulation of transcription, DNA-templated; GO:0006351,transcription, DNA-templated	Dof domain, zinc finger
g423	Others	TR	Others	387	790	1.031	up	LG1	2304505	2311049	+	--	--	K14489 arabidopsis histidine kinase 2/3/4 (cytokinin receptor) [EC:2.7.13.3] | (RefSeq) WOL; CHASE domain containing histidine kinase protein (A)	--	RecName: Full=Histidine kinase 1; EC=2.7.13.3; AltName: Full=Arabidopsis histidine kinase 1; Short=AtHK1; AltName: Full=Protein AUTHENTIC HIS-KINASE 1;	SubName: Full=Uncharacterized protein {ECO:0000313|EnsemblPlants:PGSC0003DMT400009219};	Sensory transduction histidine kinase	GO:0016021,integral component of membrane; GO:0005622,intracellular; GO:0005886,plasma membrane; GO:0009927,histidine phosphotransfer kinase activity; GO:0005034,osmosensor activity; GO:0000155,phosphorelay sensor kinase activity; GO:0009738,abscisic acid-activated signaling pathway; GO:0006970,response to osmotic stress; GO:0009414,response to water deprivation; GO:0010431,seed maturation; GO:00…	Cache domain
g42347	Trihelix	TF	Trihelix	375	165	-1.184	down	LG11	6529051	6531962	-	--	--	--	--	RecName: Full=Trihelix transcription factor GT-2; AltName: Full=Trihelix DNA-binding protein GT-2;	SubName: Full=trihelix transcription factor GTL1-like {ECO:0000313|RefSeq:XP_016437883.1};	Transcription factor GT-2 and related proteins, contains trihelix DNA-binding/SANT domain	GO:0005634,nucleus; GO:0003677,DNA binding; GO:0003700,DNA-binding transcription factor activity; GO:0006351,transcription, DNA-templated	Myb/SANT-like DNA-binding domain
g42376	C2C2-Dof	TF	C2C2->C2C2-Dof	44	4	-3.579	down	LG11	6694694	6696934	+	--	--	K16222 Dof zinc finger protein DOF5.5 | (RefSeq) CDF1; cycling DOF factor 1 (A)	--	RecName: Full=Dof zinc finger protein DOF3.5; Short=AtDOF3.5;	SubName: Full=Uncharacterized protein {ECO:0000313|EMBL:CDP18281.1};	--	GO:0005634,nucleus; GO:0003677,DNA binding; GO:0003700,DNA-binding transcription factor activity; GO:0046872,metal ion binding; GO:0006355,regulation of transcription, DNA-templated; GO:0006351,transcription, DNA-templated	Dof domain, zinc finger
g42465	GeBP	TF	GeBP	24	58	1.276	up	LG11	7441493	7442741	-	--	--	--	--	RecName: Full=Probable transcription factor At1g61730 {ECO:0000305}; AltName: Full=Storekeeper-like protein At1g61730 {ECO:0000305};	SubName: Full=mediator-associated protein 1-like {ECO:0000313|RefSeq:XP_016473271.1};	--	GO:0009507,chloroplast; GO:0005829,cytosol; GO:0005730,nucleolus; GO:0043565,sequence-specific DNA binding; GO:0044212,transcription regulatory region DNA binding; GO:0019760,glucosinolate metabolic process; GO:0006355,regulation of transcription, DNA-templated; GO:0006351,transcription, DNA-templated	Myb/SANT-like DNA-binding domain
g42499	NF-YB	TF	NF-Y->NF-YB	109	30	-1.871	down	LG11	7696356	7697161	-	--	--	K21751 down-regulator of transcription 1 | (RefSeq) NF-YB13; nuclear factor Y, subunit B13 (A)	--	RecName: Full=Nuclear transcription factor Y subunit B-3; Short=AtNF-YB-3; AltName: Full=Transcriptional activator HAP3C;	--	CCAAT-binding factor, subunit A (HAP3)	GO:0005634,nucleus; GO:0003700,DNA-binding transcription factor activity; GO:0046982,protein heterodimerization activity; GO:0043565,sequence-specific DNA binding; GO:0006351,transcription, DNA-templated	Bromodomain associated
g42688	bHLH	TF	bHLH	38	145	1.946	up	LG11	8915286	8918285	-	--	--	K12126 phytochrome-interacting factor 3 | (RefSeq) PIF3; phytochrome interacting factor 3 (A)	--	RecName: Full=Transcription factor bHLH77; AltName: Full=Basic helix-loop-helix protein 77; Short=AtbHLH77; Short=bHLH 77; AltName: Full=Protein ACTIVATOR FOR CELL ELONGATION 3; AltName: Full=Transcription factor EN 87; AltName: Full=bHLH transcription factor bHLH077;	--	--	GO:0005634,nucleus; GO:0003700,DNA-binding transcription factor activity; GO:0046983,protein dimerization activity; GO:0044212,transcription regulatory region DNA binding; GO:0006355,regulation of transcription, DNA-templated; GO:0006351,transcription, DNA-templated	Helix-loop-helix DNA-binding domain
g42813	zf-HD	TF	zf-HD	56	20	-1.478	down	LG11	9780195	9781617	+	--	--	--	--	RecName: Full=Zinc-finger homeodomain protein 11; Short=AtZHD11; AltName: Full=Transcription factor HB29; Short=AtHB-29; AltName: Full=Zinc finger homeodomain transcription factor 1;	--	--	GO:0005634,nucleus; GO:0003677,DNA binding; GO:0003700,DNA-binding transcription factor activity; GO:0046872,metal ion binding; GO:0042803,protein homodimerization activity; GO:0045893,positive regulation of transcription, DNA-templated; GO:0009414,response to water deprivation; GO:0006351,transcription, DNA-templated	--
g43121	B3	TF	B3->B3	2	21	3.501	up	LG11	11936270	11937622	-	--	--	--	PREDICTED: putative B3 domain-containing protein At5g66980 [Ipomoea nil]	RecName: Full=B3 domain-containing protein REM1; AltName: Full=Protein REPRODUCTIVE MERISTEM 1; Short=AtREM1;	SubName: Full=B3 domain-containing protein REM20-like isoform X2 {ECO:0000313|RefSeq:XP_009769341.1};	--	GO:0005634,nucleus; GO:0003677,DNA binding; GO:0009908,flower development; GO:0006355,regulation of transcription, DNA-templated; GO:0006351,transcription, DNA-templated	B3 DNA binding domain
g43226	SNF2	TR	SNF2	135	64	-1.075	down	LG11	12691546	12697663	-	--	--	K10875 DNA repair and recombination protein RAD54 and RAD54-like protein [EC:3.6.4.-] | (RefSeq) RAD54; DNA repair/recombination protein (A)	PREDICTED: protein CHROMATIN REMODELING 25 [Ipomoea nil]	RecName: Full=DNA repair and recombination protein RAD54; Short=OsRad54; EC=3.6.4.-;	SubName: Full=DNA repair and recombination protein RAD54 {ECO:0000313|RefSeq:XP_009785838.1};	DNA repair protein, SNF2 family	GO:0005634,nucleus; GO:0005524,ATP binding; GO:0003677,DNA binding; GO:0004386,helicase activity; GO:0007049,cell cycle; GO:0051301,cell division; GO:0071480,cellular response to gamma radiation; GO:0071248,cellular response to metal ion; GO:0045003,double-strand break repair via synthesis-dependent strand annealing; GO:0051701,interaction with host	DEAD/DEAH box helicase
g43455	PHD	TR	PHD	29	4	-2.838	down	LG11	14237213	14238531	-	--	--	K11380 NuA3 HAT complex component NTO1 | (RefSeq) RING/FYVE/PHD zinc finger superfamily protein (A)	PREDICTED: protein Jade-1 [Ipomoea nil]	RecName: Full=Histone-lysine N-methyltransferase TRX1 {ECO:0000305}; Short=OsTrx1 {ECO:0000303|PubMed:24420930}; EC=2.1.1.43 {ECO:0000269|PubMed:24420930}; AltName: Full=Protein SET DOMAIN GROUP 723 {ECO:0000305}; AltName: Full=SET family protein 33 {ECO:0000305}; Short=OsSET33 {ECO:0000303|PubMed:23762371};	SubName: Full=protein Jade-1 {ECO:0000313|RefSeq:XP_009773229.1};	PHD finger protein BR140/LIN-49	GO:0005634,nucleus; GO:0042054,histone methyltransferase activity; GO:0018024,histone-lysine N-methyltransferase activity; GO:0046872,metal ion binding; GO:0009908,flower development; GO:0035556,intracellular signal transduction; GO:0048578,positive regulation of long-day photoperiodism, flowering	PHD-finger
g4366	B3	TF	B3->B3	643	223	-1.532	down	LG2	1278177	1280380	-	--	--	--	PREDICTED: B3 domain-containing protein At3g19184 [Ipomoea nil]	RecName: Full=B3 domain-containing protein At3g19184;	SubName: Full=B3 domain-containing protein {ECO:0000313|EMBL:PHT63118.1};	--	GO:0005634,nucleus; GO:0003677,DNA binding; GO:0006355,regulation of transcription, DNA-templated; GO:0006351,transcription, DNA-templated	B3 DNA binding domain
g4367	NF-YA	TF	NF-Y->NF-YA	1156	2527	1.129	up	LG2	1282031	1285630	-	--	--	K08064 nuclear transcription factor Y, alpha | (RefSeq) NF-YA1; nuclear factor Y, subunit A1 (A)	PREDICTED: nuclear transcription factor Y subunit A-1-like [Ipomoea nil]	RecName: Full=Nuclear transcription factor Y subunit A-1; Short=AtNF-YA-1; AltName: Full=Protein EMBRYO DEFECTIVE 2220; AltName: Full=Transcriptional activator HAP2A;	SubName: Full=Putative nuclear transcription factor Y subunit A-1-like {ECO:0000313|EMBL:JAP25043.1};	CCAAT-binding factor, subunit B (HAP2)	GO:0016602,CCAAT-binding factor complex; GO:0003677,DNA binding; GO:0003700,DNA-binding transcription factor activity; GO:0009793,embryo development ending in seed dormancy; GO:0055046,microgametogenesis; GO:0048510,regulation of timing of transition from vegetative to reproductive phase; GO:0006355,regulation of transcription, DNA-templated; GO:0048316,seed development; GO:0010262,somatic embryo…	CCAAT-binding transcription factor (CBF-B/NF-YA) subunit B
g43713	SWI/SNF-SWI3	TR	SWI/SNF-SWI3	103	36	-1.511	down	LG11	16214876	16223247	+	--	--	K11450 lysine-specific histone demethylase 1A [EC:1.-.-.-] | (RefSeq) LDL2; LSD1-like2 (A)	PREDICTED: lysine-specific histone demethylase 1 homolog 2 [Ipomoea nil]	RecName: Full=Lysine-specific histone demethylase 1 homolog 2 {ECO:0000303|PubMed:17921315}; EC=1.-.-.- {ECO:0000305}; AltName: Full=Flavin-containing amine oxidase domain-containing protein 2; AltName: Full=Protein LSD1-LIKE 2 {ECO:0000303|PubMed:17921315};	SubName: Full=Lysine-specific histone demethylase 1-like 2 {ECO:0000313|EMBL:OIT07677.1};	Amine oxidase	GO:0003677,DNA binding; GO:0016491,oxidoreductase activity; GO:0051568,histone H3-K4 methylation; GO:0006355,regulation of transcription, DNA-templated; GO:0006351,transcription, DNA-templated	SWIRM domain
g43726	HSF	TF	HSF	286	656	1.195	up	LG11	16317683	16319979	+	--	--	K09419 heat shock transcription factor, other eukaryote | (RefSeq) HSFA2; heat shock transcription factor A2 (A)	PREDICTED: heat shock factor protein HSF30-like [Ipomoea nil]	RecName: Full=Heat shock factor protein HSF30; AltName: Full=Heat shock transcription factor 30; Short=HSTF 30; AltName: Full=Heat stress transcription factor;	SubName: Full=heat shock factor protein HSF30 isoform X1 {ECO:0000313|RefSeq:XP_016537777.1};	Heat shock transcription factor	GO:0005634,nucleus; GO:0003700,DNA-binding transcription factor activity; GO:0043565,sequence-specific DNA binding; GO:0006351,transcription, DNA-templated	HSF-type DNA-binding
g43804	bZIP	TF	bZIP	2760	128	-4.427	down	LG11	16835743	16838806	+	--	--	K16241 transcription factor HY5 | (RefSeq) HY5; Basic-leucine zipper (bZIP) transcription factor family protein (A)	PREDICTED: transcription factor HY5-like [Ipomoea nil]	RecName: Full=Transcription factor HY5; AltName: Full=LeHY5; AltName: Full=tHY5;	SubName: Full=Uncharacterized protein {ECO:0000313|EMBL:PHT40367.1};	Transcriptional activator FOSB/c-Fos and related bZIP transcription factors	GO:0005634,nucleus; GO:0003700,DNA-binding transcription factor activity; GO:0000977,RNA polymerase II regulatory region sequence-specific DNA binding; GO:0009585,red, far-red light phototransduction; GO:0006355,regulation of transcription, DNA-templated; GO:0006351,transcription, DNA-templated	Nnf1
g43908	AP2/ERF-ERF	TF	AP2/ERF->AP2/ERF-ERF	94	12	-2.952	down	LG11	17626940	17630557	-	--	--	K09286 EREBP-like factor | (RefSeq) ERF7; ethylene response factor 7 (A)	PREDICTED: ethylene-responsive transcription factor ERF003-like [Ipomoea nil]	RecName: Full=Ethylene-responsive transcription factor ERF003;	SubName: Full=Uncharacterized protein {ECO:0000313|EMBL:KCW81332.1};	--	GO:0005634,nucleus; GO:0003677,DNA binding; GO:0003700,DNA-binding transcription factor activity; GO:0009873,ethylene-activated signaling pathway; GO:0006351,transcription, DNA-templated	AP2 domain
g43994	GRAS	TF	GRAS	274	603	1.138	up	LG11	18379619	18381288	+	--	--	K14494 DELLA protein | (RefSeq) RGL2; RGA-like 2 (A)	PREDICTED: scarecrow-like protein 13 [Nicotiana tabacum]	RecName: Full=Scarecrow-like protein 13; Short=AtSCL13; AltName: Full=GRAS family protein 24; Short=AtGRAS-24;	SubName: Full=scarecrow-like protein 13 {ECO:0000313|RefSeq:XP_016487801.1};	--	GO:0005737,cytoplasm; GO:0005634,nucleus; GO:0003700,DNA-binding transcription factor activity; GO:0043565,sequence-specific DNA binding; GO:0006351,transcription, DNA-templated	GRAS domain family
g44525	B3	TF	B3->B3	20	53	1.422	up	LG11	22669317	22670801	+	--	--	--	PREDICTED: B3 domain-containing protein REM9-like [Ipomoea nil]	RecName: Full=B3 domain-containing protein REM10; AltName: Full=Protein REPRODUCTIVE MERISTEM 10;	SubName: Full=Uncharacterized protein {ECO:0000313|EnsemblPlants:PGSC0003DMT400063932};	--	GO:0005634,nucleus; GO:0003677,DNA binding; GO:0006355,regulation of transcription, DNA-templated; GO:0006351,transcription, DNA-templated	B3 DNA binding domain
g4479	B3	TF	B3->B3	100	33	-1.605	down	LG2	1944211	1946781	-	--	--	--	PREDICTED: B3 domain-containing protein Os01g0234100-like [Ipomoea nil]	RecName: Full=B3 domain-containing protein Os01g0234100;	--	--	GO:0005634,nucleus; GO:0003677,DNA binding; GO:0006355,regulation of transcription, DNA-templated; GO:0006351,transcription, DNA-templated	Protein of unknown function (DUF724)
g4531	OFP	TF	OFP	20	2	-3.562	down	LG2	2397453	2398210	+	--	--	--	PREDICTED: transcription repressor OFP8-like [Ipomoea nil]	RecName: Full=Transcription repressor OFP6; AltName: Full=Ovate family protein 6; Short=AtOFP6;	SubName: Full=transcription repressor OFP7-like {ECO:0000313|RefSeq:XP_016501038.1};	--	GO:0005634,nucleus; GO:0045892,negative regulation of transcription, DNA-templated; GO:0006351,transcription, DNA-templated	Transcriptional repressor, ovate
g45799	mTERF	TR	mTERF	157	62	-1.348	down	LG11	32300946	32302225	-	--	--	K15032 mTERF domain-containing protein, mitochondrial | (RefSeq) Mitochondrial transcription termination factor family protein (A)	PREDICTED: transcription termination factor MTEF1, chloroplastic [Ipomoea nil]	RecName: Full=Transcription termination factor MTEF1, chloroplastic {ECO:0000305}; AltName: Full=Mitochondrial transcription termination factor 1 {ECO:0000303|PubMed:23087700}; AltName: Full=Protein EMBRYO DEFECTIVE 93 {ECO:0000305}; AltName: Full=Protein SINGLET OXYGEN-LINKED DEATH ACTIVATOR 10 {ECO:0000303|PubMed:19563435}; Flags: Precursor;	SubName: Full=Uncharacterized protein {ECO:0000313|EMBL:PIN11855.1};	Mitochondrial transcription termination factor, mTERF	GO:0009507,chloroplast; GO:0003690,double-stranded DNA binding; GO:0019843,rRNA binding; GO:0003727,single-stranded RNA binding; GO:0009658,chloroplast organization; GO:0006353,DNA-templated transcription, termination; GO:0009793,embryo development ending in seed dormancy; GO:0006355,regulation of transcription, DNA-templated; GO:0042255,ribosome assembly; GO:0008380,RNA splicing	mTERF
g4583	C2H2	TF	C2H2	456	209	-1.125	down	LG2	2710822	2713579	+	--	--	--	PREDICTED: zinc finger protein WIP3-like [Ipomoea nil]	RecName: Full=Zinc finger protein WIP3; AltName: Full=WIP-domain protein 3 {ECO:0000303|PubMed:11782451}; Short=AtWIP3 {ECO:0000303|PubMed:11782451};	SubName: Full=Uncharacterized protein {ECO:0000313|EMBL:EEE87629.2};	FOG: Zn-finger	GO:0005634,nucleus; GO:0003700,DNA-binding transcription factor activity; GO:0046872,metal ion binding; GO:0003676,nucleic acid binding; GO:0006355,regulation of transcription, DNA-templated; GO:0006351,transcription, DNA-templated	C2H2-type zinc finger
g46237	AP2/ERF-ERF	TF	AP2/ERF->AP2/ERF-ERF	528	136	-1.952	down	LG11	36103565	36104307	-	--	--	K14516 ethylene-responsive transcription factor 1 | (RefSeq) ERF1; ethylene response factor 1 (A)	PREDICTED: pathogenesis-related genes transcriptional activator PTI5-like [Ipomoea nil]	RecName: Full=Pathogenesis-related genes transcriptional activator PTI5; AltName: Full=PTO-interacting protein 5;	SubName: Full=ERF3 transcription factor {ECO:0000313|EMBL:ADC94860.1};	--	GO:0005634,nucleus; GO:0003677,DNA binding; GO:0003700,DNA-binding transcription factor activity; GO:0006952,defense response; GO:0006351,transcription, DNA-templated	AP2 domain
g46272	AP2/ERF-ERF	TF	AP2/ERF->AP2/ERF-ERF	878	346	-1.342	down	LG11	36296574	36297539	+	--	--	K09286 EREBP-like factor | (RefSeq) ERF9; erf domain protein 9 (A)	PREDICTED: ethylene-responsive transcription factor 4-like [Ipomoea nil]	RecName: Full=Ethylene-responsive transcription factor 9; Short=AtERF9; AltName: Full=Ethylene-responsive element-binding factor 9; Short=EREBP-9;	SubName: Full=ERF9 {ECO:0000313|EMBL:AMS25577.1}; Flags: Fragment;	--	GO:0016020,membrane; GO:0005634,nucleus; GO:0003700,DNA-binding transcription factor activity; GO:0043565,sequence-specific DNA binding; GO:0006952,defense response; GO:0009873,ethylene-activated signaling pathway; GO:0019760,glucosinolate metabolic process; GO:0006351,transcription, DNA-templated	AP2 domain
g4631	C2H2	TF	C2H2	226	75	-1.593	down	LG2	3077913	3078821	-	--	--	--	putative zinc finger protein [Ipomoea trifida]	RecName: Full=Zinc finger protein ZAT5;	SubName: Full=Putative zinc finger protein {ECO:0000313|EMBL:AAS79571.1};	FOG: Zn-finger	GO:0005634,nucleus; GO:0003700,DNA-binding transcription factor activity; GO:0046872,metal ion binding; GO:0043565,sequence-specific DNA binding; GO:0006355,regulation of transcription, DNA-templated; GO:0006351,transcription, DNA-templated	C2H2-type zinc finger
g47048	bHLH	TF	bHLH	538	160	-1.75	down	LG12	979301	982683	+	--	--	K20558 transcription factor SPEECHLESS | (RefSeq) SPCH; basic helix-loop-helix (bHLH) DNA-binding superfamily protein (A)	PREDICTED: transcription factor bHLH96-like [Ipomoea nil]	RecName: Full=Transcription factor bHLH96; AltName: Full=Basic helix-loop-helix protein 96; Short=AtbHLH96; Short=bHLH 96; AltName: Full=Transcription factor EN 15; AltName: Full=bHLH transcription factor bHLH096;	SubName: Full=transcription factor bHLH94-like {ECO:0000313|RefSeq:XP_009803283.1};	--	GO:0005634,nucleus; GO:0003677,DNA binding; GO:0003700,DNA-binding transcription factor activity; GO:0046983,protein dimerization activity; GO:0006351,transcription, DNA-templated	Helix-loop-helix DNA-binding domain
g47182	Others	TR	Others	643	1344	1.064	up	LG12	2042752	2045963	+	--	--	K14492 two-component response regulator ARR-A family | (RefSeq) ARR4; response regulator 4 (A)	PREDICTED: two-component response regulator ARR3-like [Ipomoea nil]	RecName: Full=Two-component response regulator ARR4; AltName: Full=Response regulator 1;	SubName: Full=two-component response regulator ARR3-like isoform X3 {ECO:0000313|RefSeq:XP_009763113.1};	GATA-4/5/6 transcription factors	GO:0005737,cytoplasm; GO:0005634,nucleus; GO:0000156,phosphorelay response regulator activity; GO:0004674,protein serine/threonine kinase activity; GO:0007623,circadian rhythm; GO:0009736,cytokinin-activated signaling pathway; GO:0009793,embryo development ending in seed dormancy; GO:0046777,protein autophosphorylation; GO:0010017,red or far-red light signaling pathway; GO:0006355,regulation of t…	Response regulator receiver domain
g47203	HB-HD-ZIP	TF	HB->HB-HD-ZIP	2085	574	-1.862	down	LG12	2207277	2210328	-	--	--	K09338 homeobox-leucine zipper protein | (RefSeq) HB-1; homeobox 1 (A)	PREDICTED: homeobox-leucine zipper protein HAT5-like [Ipomoea nil]	RecName: Full=Homeobox-leucine zipper protein HAT5; AltName: Full=HD-ZIP protein ATHB-1; AltName: Full=Homeodomain transcription factor ATHB-1; AltName: Full=Homeodomain-leucine zipper protein HAT5; Short=HD-ZIP protein 5;	SubName: Full=Uncharacterized protein {ECO:0000313|EMBL:CDP00280.1};	Transcription factor HEX, contains HOX and HALZ domains	GO:0005634,nucleus; GO:0003700,DNA-binding transcription factor activity; GO:0042803,protein homodimerization activity; GO:0043565,sequence-specific DNA binding; GO:0009965,leaf morphogenesis; GO:0045893,positive regulation of transcription, DNA-templated; GO:0009637,response to blue light; GO:0009651,response to salt stress; GO:0006351,transcription, DNA-templated	Homeobox KN domain
g47362	C2H2	TF	C2H2	30	196	2.707	up	LG12	3348780	3351179	-	--	--	--	PREDICTED: MATH and LRR domain-containing protein PFE0570w-like [Ipomoea nil]	--	SubName: Full=zinc finger protein ZAT4-like {ECO:0000313|RefSeq:XP_016495152.1};	FOG: Zn-finger	GO:0003676,nucleic acid binding	C2H2-type zinc finger
g47459	bZIP	TF	bZIP	1123	348	-1.69	down	LG12	4028553	4029362	+	--	--	K09060 plant G-box-binding factor | (RefSeq) bZIP68; basic region/leucine zipper transcription factor 68 (A)	PREDICTED: basic leucine zipper 43-like [Ipomoea nil]	RecName: Full=Basic leucine zipper 43 {ECO:0000303|PubMed:11906833}; Short=AtbZIP43 {ECO:0000303|PubMed:11906833}; Short=bZIP protein 43 {ECO:0000303|PubMed:11906833};	SubName: Full=basic leucine zipper 43-like {ECO:0000313|RefSeq:XP_016500977.1};	--	GO:0005634,nucleus; GO:0003677,DNA binding; GO:0003700,DNA-binding transcription factor activity; GO:0006351,transcription, DNA-templated	SWI5-dependent HO expression protein 3
g47480	GARP-G2-like	TF	GARP->GARP-G2-like	240	66	-1.873	down	LG12	4169383	4171931	+	--	--	K14491 two-component response regulator ARR-B family | (RefSeq) RR1; response regulator 1 (A)	PREDICTED: myb family transcription factor EFM-like [Ipomoea nil]	RecName: Full=Transcription factor HHO3 {ECO:0000305}; AltName: Full=MYB-domain transcription factor HHO3 {ECO:0000305}; AltName: Full=Protein HRS1 HOMOLOG 3 {ECO:0000305};	SubName: Full=Uncharacterized protein {ECO:0000313|EMBL:PIN09501.1};	--	GO:0005634,nucleus; GO:0003677,DNA binding; GO:0003700,DNA-binding transcription factor activity; GO:0006355,regulation of transcription, DNA-templated; GO:0006351,transcription, DNA-templated	Myb-like DNA-binding domain
g4766	LOB	TF	LOB	24	170	2.841	up	LG2	3938571	3939920	-	--	--	K13944 LOB domain-containing protein 16 | (RefSeq) LBD16; lateral organ boundaries-domain 16 (A)	PREDICTED: LOB domain-containing protein 1 [Ipomoea nil]	RecName: Full=LOB domain-containing protein 1; AltName: Full=ASYMMETRIC LEAVES 2-like protein 8; Short=AS2-like protein 8;	SubName: Full=LOB domain-containing protein 1-like {ECO:0000313|RefSeq:XP_016577623.1};	--	GO:0005739,mitochondrion	Lateral organ boundaries (LOB) domain
g47882	C2C2-GATA	TF	C2C2->C2C2-GATA	123	47	-1.383	down	LG12	7401011	7404383	+	--	--	--	PREDICTED: GATA transcription factor 11-like [Ipomoea nil]	RecName: Full=GATA transcription factor 11;	SubName: Full=Uncharacterized protein {ECO:0000313|EMBL:CDP07101.1};	GATA-4/5/6 transcription factors	GO:0005634,nucleus; GO:0005667,transcription factor complex; GO:0003682,chromatin binding; GO:0003700,DNA-binding transcription factor activity; GO:0000977,RNA polymerase II regulatory region sequence-specific DNA binding; GO:0001085,RNA polymerase II transcription factor binding; GO:0001228,DNA-binding transcription activator activity, RNA polymerase II-specific; GO:0008270,zinc ion binding; GO:…	GATA zinc finger
g4815	MYB	TF	MYB->MYB	1558	6042	1.955	up	LG2	4217056	4218600	-	--	--	K09422 transcription factor MYB, plant | (RefSeq) MYB59; myb domain protein 59 (A)	PREDICTED: transcription factor MYB59-like isoform X1 [Ipomoea nil]	RecName: Full=Transcription factor MYB48; AltName: Full=Myb-related protein 48; Short=AtMYB48;	--	Transcription factor, Myb superfamily	GO:0005634,nucleus; GO:0003700,DNA-binding transcription factor activity; GO:0000981,DNA-binding transcription factor activity, RNA polymerase II-specific; GO:0043565,sequence-specific DNA binding; GO:0001135,RNA polymerase II transcription regulator recruiting activity; GO:0044212,transcription regulatory region DNA binding; GO:0030154,cell differentiation; GO:0006357,regulation of transcription…	Myb-like DNA-binding domain
g48394	B3	TF	B3->B3	642	222	-1.527	down	LG12	11324200	11331145	+	--	--	K09287 RAV-like factor | (RefSeq) RAV1; related to ABI3/VP1 1 (A)	--	RecName: Full=B3 domain-containing transcription repressor VAL1; AltName: Full=Protein HIGH-LEVEL EXPRESSION OF SUGAR-INDUCIBLE 2; AltName: Full=Protein VP1/ABI3-LIKE 1;	--	--	GO:0005739,mitochondrion; GO:0005634,nucleus; GO:0003677,DNA binding; GO:0003700,DNA-binding transcription factor activity; GO:0008270,zinc ion binding; GO:0045892,negative regulation of transcription, DNA-templated; GO:0009737,response to abscisic acid; GO:0009744,response to sucrose; GO:0006351,transcription, DNA-templated	CW-type Zinc Finger
g4934	GRAS	TF	GRAS	2218	557	-1.993	down	LG2	4971449	4974786	+	--	--	K14494 DELLA protein | (RefSeq) GAI; GRAS family transcription factor family protein (A)	PREDICTED: scarecrow-like protein 30 [Ipomoea nil]	RecName: Full=Scarecrow-like protein 9; Short=AtSCL9; AltName: Full=GRAS family protein 13; Short=AtGRAS-13;	SubName: Full=Uncharacterized protein {ECO:0000313|EMBL:PHT99005.1};	--	GO:0005634,nucleus; GO:0003700,DNA-binding transcription factor activity; GO:0043565,sequence-specific DNA binding; GO:0006355,regulation of transcription, DNA-templated; GO:0006351,transcription, DNA-templated	GRAS domain family
g495	FAR1	TF	FAR1	49	103	1.044	up	LG1	2723633	2726838	+	--	--	K17604 zinc finger SWIM domain-containing protein 3 | (RefSeq) FRS8; FAR1-related sequence 8 (A)	PREDICTED: protein FAR1-RELATED SEQUENCE 5-like [Ipomoea nil]	RecName: Full=Protein FAR1-RELATED SEQUENCE 5;	SubName: Full=Uncharacterized protein {ECO:0000313|EMBL:KDP24914.1};	--	GO:0005634,nucleus; GO:0008270,zinc ion binding; GO:0006355,regulation of transcription, DNA-templated	RNase H-like domain found in reverse transcriptase
g49525	AP2/ERF-ERF	TF	AP2/ERF->AP2/ERF-ERF	19	1	-4.832	down	LG12	19694228	19695471	+	--	--	K09286 EREBP-like factor | (RefSeq) ERF104; ethylene response factor 104 (A)	PREDICTED: ethylene-responsive transcription factor ERF098-like [Ipomoea nil]	RecName: Full=Ethylene-responsive transcription factor ERF098;	SubName: Full=ethylene-responsive transcription factor ERF098-like {ECO:0000313|RefSeq:XP_016567929.1};	--	GO:0005634,nucleus; GO:0003677,DNA binding; GO:0003700,DNA-binding transcription factor activity; GO:0009873,ethylene-activated signaling pathway; GO:0010200,response to chitin; GO:0006351,transcription, DNA-templated	AP2 domain
g49791	NF-YB	TF	NF-Y->NF-YB	0	9	5.622	up	LG12	21559065	21560033	+	--	--	K21751 down-regulator of transcription 1 | (RefSeq) NF-YB13; nuclear factor Y, subunit B13 (A)	PREDICTED: nuclear transcription factor Y subunit B-1-like [Ipomoea nil]	RecName: Full=Nuclear transcription factor Y subunit B-5; Short=AtNF-YB-5;	SubName: Full=nuclear transcription factor Y subunit B-4 {ECO:0000313|RefSeq:XP_010269452.1};	CCAAT-binding factor, subunit A (HAP3)	GO:0005634,nucleus; GO:0003700,DNA-binding transcription factor activity; GO:0046982,protein heterodimerization activity; GO:0043565,sequence-specific DNA binding; GO:0006351,transcription, DNA-templated	Core histone H2A/H2B/H3/H4
g49910	C2C2-CO-like	TF	C2C2->C2C2-CO-like	588	1461	1.314	up	LG12	22651791	22653237	-	--	--	K12135 zinc finger protein CONSTANS | (RefSeq) CO; B-box type zinc finger protein with CCT domain-containing protein (A)	PREDICTED: zinc finger protein CONSTANS-LIKE 5-like isoform X2 [Ipomoea nil]	RecName: Full=Zinc finger protein CONSTANS-LIKE 5;	SubName: Full=Uncharacterized protein {ECO:0000313|EMBL:CDP02934.1};	GATA-4/5/6 transcription factors	GO:0005634,nucleus; GO:0003700,DNA-binding transcription factor activity; GO:0008270,zinc ion binding; GO:0048571,long-day photoperiodism; GO:0048579,negative regulation of long-day photoperiodism, flowering; GO:0045892,negative regulation of transcription, DNA-templated; GO:0048576,positive regulation of short-day photoperiodism, flowering; GO:0009909,regulation of flower development; GO:0006355…	B-box zinc finger
g49983	LOB	TF	LOB	416	95	-2.129	down	LG12	23237930	23239126	-	--	--	--	PREDICTED: LOB domain-containing protein 40-like isoform X2 [Ipomoea nil]	RecName: Full=LOB domain-containing protein 40; AltName: Full=ASYMMETRIC LEAVES 2-like protein 37; Short=AS2-like protein 37;	SubName: Full=Uncharacterized protein {ECO:0000313|EMBL:CDP00620.1};	--	GO:0009739,response to gibberellin	Lateral organ boundaries (LOB) domain
g50327	GNAT	TR	GNAT	108	23	-2.202	down	LG12	25919517	25920609	-	--	--	K22883 L-ornithine N5-acetyltransferase [EC:2.3.1.-] | (RefSeq) Acyl-CoA N-acyltransferases (NAT) superfamily protein (A)	--	RecName: Full=Tyramine N-feruloyltransferase 4/11; EC=2.3.1.110; AltName: Full=Hydroxycinnamoyl-CoA: tyramine N-hydroxycinnamoyltransferase;	SubName: Full=tyramine N-feruloyltransferase 4/11 {ECO:0000313|RefSeq:XP_009795400.1};	Diamine acetyltransferase	GO:0005737,cytoplasm; GO:0008080,N-acetyltransferase activity; GO:0050366,tyramine N-feruloyltransferase activity	Acetyltransferase (GNAT) family
g50340	B3	TF	B3->B3	20	73	1.931	up	LG12	26002464	26012029	-	--	--	K13120 protein FAM32A | (RefSeq) 7-dehydrocholesterol reductase-like protein (A)	--	RecName: Full=B3 domain-containing protein REM10; AltName: Full=Protein REPRODUCTIVE MERISTEM 10;	SubName: Full=Uncharacterized protein {ECO:0000313|EMBL:CDP18427.1};	--	GO:0005634,nucleus; GO:0003677,DNA binding; GO:0006355,regulation of transcription, DNA-templated; GO:0006351,transcription, DNA-templated	B3 DNA binding domain
g50506	GARP-ARR-B	TF	GARP->GARP-ARR-B	2816	5728	1.025	up	LG12	27049611	27053377	+	--	--	K14491 two-component response regulator ARR-B family | (RefSeq) ARR11; response regulator 11 (A)	--	RecName: Full=Two-component response regulator ORR26 {ECO:0000305}; AltName: Full=OsRRB6 {ECO:0000303|PubMed:16891544};	--	GATA-4/5/6 transcription factors	GO:0005634,nucleus; GO:0003677,DNA binding; GO:0003700,DNA-binding transcription factor activity; GO:0009736,cytokinin-activated signaling pathway; GO:0000160,phosphorelay signal transduction system; GO:0010082,regulation of root meristem growth; GO:0006355,regulation of transcription, DNA-templated; GO:0006351,transcription, DNA-templated	Myb-like DNA-binding domain
g50833	LOB	TF	LOB	282	616	1.125	up	LG12	29434436	29438687	-	--	--	K13944 LOB domain-containing protein 16 | (RefSeq) LBD16; lateral organ boundaries-domain 16 (A)	PREDICTED: LOB domain-containing protein 4-like [Ipomoea nil]	RecName: Full=LOB domain-containing protein 4; AltName: Full=ASYMMETRIC LEAVES 2-like protein 6; Short=AS2-like protein 6;	SubName: Full=Uncharacterized protein {ECO:0000313|EnsemblPlants:Solyc11g045530.1.1};	--	--	Lateral organ boundaries (LOB) domain
g5103	AP2/ERF-ERF	TF	AP2/ERF->AP2/ERF-ERF	2366	948	-1.32	down	LG2	5988375	5989460	-	--	--	K09286 EREBP-like factor | (RefSeq) ERF10; ERF domain protein 10 (A)	PREDICTED: pathogenesis-related genes transcriptional activator PTI6-like [Ipomoea nil]	RecName: Full=Pathogenesis-related genes transcriptional activator PTI6; AltName: Full=PTO-interacting protein 6;	SubName: Full=pathogenesis-related genes transcriptional activator PTI6-like {ECO:0000313|RefSeq:XP_009767000.1};	--	GO:0005634,nucleus; GO:0003677,DNA binding; GO:0003700,DNA-binding transcription factor activity; GO:0006952,defense response; GO:0006351,transcription, DNA-templated	AP2 domain
g51198	AUX/IAA	TR	AUX/IAA	151	50	-1.595	down	LG13	232832	238007	-	--	--	K14484 auxin-responsive protein IAA | (RefSeq) AXR3; AUX/IAA transcriptional regulator family protein (A)	PREDICTED: auxin-responsive protein IAA1-like isoform X2 [Ipomoea nil]	RecName: Full=Auxin-responsive protein IAA17; AltName: Full=Auxin response 3; AltName: Full=Indoleacetic acid-induced protein 17;	RecName: Full=Auxin-responsive protein {ECO:0000256|RuleBase:RU004549};	--	GO:0005634,nucleus; GO:0003700,DNA-binding transcription factor activity; GO:0042802,identical protein binding; GO:0009734,auxin-activated signaling pathway; GO:1900057,positive regulation of leaf senescence; GO:0009733,response to auxin; GO:0006351,transcription, DNA-templated	AUX/IAA family
g51746	WRKY	TF	WRKY	677	37	-4.195	down	LG13	4201055	4203071	+	--	--	K18834 WRKY transcription factor 1 | (RefSeq) ZAP1; zinc-dependent activator protein-1 (A)	PREDICTED: probable WRKY transcription factor 40 isoform X2 [Ipomoea nil]	RecName: Full=Probable WRKY transcription factor 40; AltName: Full=WRKY DNA-binding protein 40;	SubName: Full=Uncharacterized protein {ECO:0000313|EMBL:CDO98227.1};	--	GO:0005634,nucleus; GO:0003700,DNA-binding transcription factor activity; GO:0043565,sequence-specific DNA binding; GO:0044212,transcription regulatory region DNA binding; GO:0042742,defense response to bacterium; GO:0050832,defense response to fungus; GO:0045892,negative regulation of transcription, DNA-templated; GO:0031347,regulation of defense response; GO:0010200,response to chitin; GO:00022…	WRKY DNA -binding domain
g52794	LOB	TF	LOB	22241	797	-4.803	down	LG13	11950627	11951867	-	--	--	--	PREDICTED: LOB domain-containing protein 41-like [Ipomoea nil]	RecName: Full=LOB domain-containing protein 41; AltName: Full=ASYMMETRIC LEAVES 2-like protein 38; Short=AS2-like protein 38;	SubName: Full=Uncharacterized protein {ECO:0000313|EMBL:CDO98432.1};	--	GO:0006355,regulation of transcription, DNA-templated	Lateral organ boundaries (LOB) domain
g52884	MYB	TF	MYB->MYB	31	2	-3.987	down	LG13	12621065	12623025	+	--	--	K09422 transcription factor MYB, plant | (RefSeq) MYB62; myb domain protein 62 (A)	PREDICTED: transcription factor MYB21-like [Ipomoea nil]	RecName: Full=Transcription factor MYB62 {ECO:0000303|PubMed:9839469}; AltName: Full=Myb-related protein 62 {ECO:0000303|PubMed:9839469}; Short=AtMYB62 {ECO:0000303|PubMed:9839469};	SubName: Full=Uncharacterized protein {ECO:0000313|EnsemblPlants:PGSC0003DMT400014383};	Transcription factor, Myb superfamily	GO:0005634,nucleus; GO:0003700,DNA-binding transcription factor activity; GO:0000981,DNA-binding transcription factor activity, RNA polymerase II-specific; GO:0043565,sequence-specific DNA binding; GO:0001135,RNA polymerase II transcription regulator recruiting activity; GO:0044212,transcription regulatory region DNA binding; GO:0030154,cell differentiation; GO:0016036,cellular response to phosph…	Myb-like DNA-binding domain
g53402	MYB	TF	MYB->MYB	38	4	-3.039	down	LG13	16474974	16477339	-	--	--	K09422 transcription factor MYB, plant | (RefSeq) MYB96; myb domain protein 96 (A)	PREDICTED: myb-related protein 306 [Ipomoea nil]	RecName: Full=Myb-related protein 306;	SubName: Full=myb-related protein 306-like {ECO:0000313|RefSeq:XP_016450803.1};	Transcription factor, Myb superfamily	GO:0005634,nucleus; GO:0003677,DNA binding; GO:0006355,regulation of transcription, DNA-templated; GO:0006351,transcription, DNA-templated	SLIDE
g53661	E2F-DP	TF	E2F-DP	90	30	-1.562	down	LG13	18549523	18552573	+	--	--	K06620 transcription factor E2F3 | (RefSeq) E2F1; E2F transcription factor 1 (A)	PREDICTED: E2F transcription factor-like E2FE isoform X1 [Ipomoea nil]	RecName: Full=E2F transcription factor-like E2FE; AltName: Full=DP-E2F-like protein 1; AltName: Full=E2F-like repressor E2L3;	SubName: Full=Putative E2F transcription factor-like E2FE-like {ECO:0000313|EMBL:JAP27608.1};	Transcription factor E2F/dimerization partner (TDP)-like proteins	GO:0005634,nucleus; GO:0005667,transcription factor complex; GO:0003677,DNA binding; GO:0003700,DNA-binding transcription factor activity; GO:0042023,DNA endoreduplication; GO:0032876,negative regulation of DNA endoreduplication; GO:0006351,transcription, DNA-templated	Sugar-specific transcriptional regulator TrmB
g53874	TAZ	TR	TAZ	1944	795	-1.29	down	LG13	20135793	20139163	-	--	--	K10523 speckle-type POZ protein | (RefSeq) BTB/POZ domain-containing protein (A)	PREDICTED: BTB/POZ and TAZ domain-containing protein 1-like [Ipomoea nil]	RecName: Full=BTB/POZ and TAZ domain-containing protein 1; AltName: Full=BTB and TAZ domain protein 1;	SubName: Full=Uncharacterized protein {ECO:0000313|EMBL:CDP15082.1};	CREB binding protein/P300 and related TAZ Zn-finger proteins	GO:0005737,cytoplasm; GO:0005634,nucleus; GO:0019005,SCF ubiquitin ligase complex; GO:0005516,calmodulin binding; GO:0004402,histone acetyltransferase activity; GO:0003712,transcription coregulator activity; GO:0031625,ubiquitin protein ligase binding; GO:0008270,zinc ion binding; GO:0009553,embryo sac development; GO:0009555,pollen development; GO:0043161,proteasome-mediated ubiquitin-dependent …	TAZ zinc finger
g53922	TRAF	TR	TRAF	29	66	1.207	up	LG13	20459455	20461205	-	--	--	K10523 speckle-type POZ protein | (RefSeq) BTB/POZ domain-containing protein (A)	PREDICTED: BTB/POZ domain-containing protein At1g55760 [Solanum lycopersicum]	RecName: Full=BTB/POZ domain-containing protein At1g55760;	SubName: Full=Uncharacterized protein {ECO:0000313|EnsemblPlants:Solyc07g065930.2.1};	Speckle-type POZ protein SPOP and related proteins with TRAF, MATH and BTB/POZ domains	GO:0005737,cytoplasm; GO:0019005,SCF ubiquitin ligase complex; GO:0031625,ubiquitin protein ligase binding; GO:0043161,proteasome-mediated ubiquitin-dependent protein catabolic process; GO:0042787,NA; GO:0030162,regulation of proteolysis	BTB/POZ domain
g54022	AP2/ERF-ERF	TF	AP2/ERF->AP2/ERF-ERF	333	142	-1.233	down	LG13	21121847	21122873	-	--	--	K09286 EREBP-like factor | (RefSeq) ERF3; ethylene responsive element binding factor 3 (A)	PREDICTED: ethylene-responsive transcription factor 3-like [Ipomoea nil]	RecName: Full=Ethylene-responsive transcription factor 3; AltName: Full=Ethylene-responsive element-binding factor 3 homolog; AltName: Full=Ethylene-responsive element-binding factor 5; Short=EREBP-5; AltName: Full=NtERF5;	SubName: Full=ethylene-responsive transcription factor 3-like {ECO:0000313|RefSeq:XP_009770784.1};	--	GO:0005634,nucleus; GO:0003677,DNA binding; GO:0003700,DNA-binding transcription factor activity; GO:0006952,defense response; GO:0009873,ethylene-activated signaling pathway; GO:0006351,transcription, DNA-templated	--
g54135	NAC	TF	NAC	267	63	-2.085	down	LG13	21918034	21920154	-	--	--	--	PREDICTED: NAC transcription factor 56-like [Ipomoea nil]	RecName: Full=NAC transcription factor 56 {ECO:0000303|PubMed:15029955}; Short=AtNAC056 {ECO:0000303|PubMed:15029955}; AltName: Full=NAC domain-containing protein 2 {ECO:0000303|PubMed:11245578}; Short=AtNAC2 {ECO:0000303|PubMed:11245578}; AltName: Full=Protein NAC-REGULATED SEED MORPHOLOGY 1 {ECO:0000303|PubMed:18849494};	SubName: Full=Uncharacterized protein {ECO:0000313|EMBL:PIN22628.1};	--	GO:0005634,nucleus; GO:0003700,DNA-binding transcription factor activity; GO:0044212,transcription regulatory region DNA binding; GO:0080060,integument development; GO:0045995,regulation of embryonic development; GO:0009753,response to jasmonic acid; GO:0048317,seed morphogenesis; GO:0006351,transcription, DNA-templated	No apical meristem (NAM) protein
g54136	NAC	TF	NAC	361	20	-4.207	down	LG13	21935393	21936896	-	--	--	--	PREDICTED: NAC domain-containing protein 72-like [Ipomoea nil]	RecName: Full=NAC domain-containing protein 72; Short=ANAC072; AltName: Full=Protein RESPONSIVE TO DESICCATION 26;	SubName: Full=NAC domain-containing protein 72-like {ECO:0000313|RefSeq:XP_016484889.1};	--	GO:0005634,nucleus; GO:0003677,DNA binding; GO:0006355,regulation of transcription, DNA-templated; GO:0006351,transcription, DNA-templated	No apical meristem (NAM) protein
g54369	WRKY	TF	WRKY	644	1380	1.099	up	LG13	23471149	23473559	+	--	--	K18835 WRKY transcription factor 2 | (RefSeq) WRKY2; WRKY DNA-binding protein 2 (A)	PREDICTED: probable WRKY transcription factor 71 [Ipomoea nil]	RecName: Full=Probable WRKY transcription factor 28; AltName: Full=WRKY DNA-binding protein 28;	SubName: Full=probable WRKY transcription factor 71 {ECO:0000313|RefSeq:XP_016468091.1};	--	GO:0005634,nucleus; GO:0003700,DNA-binding transcription factor activity; GO:0043565,sequence-specific DNA binding; GO:0006351,transcription, DNA-templated	WRKY DNA -binding domain
g54384	Others	TR	Others	4029	1970	-1.033	down	LG13	23569389	23570796	+	--	--	K12135 zinc finger protein CONSTANS | (RefSeq) CO; B-box type zinc finger protein with CCT domain-containing protein (A)	PREDICTED: zinc finger protein CONSTANS-LIKE 4-like [Ipomoea nil]	RecName: Full=Zinc finger protein CONSTANS-LIKE 4;	SubName: Full=Uncharacterized protein {ECO:0000313|EMBL:OIT00100.1};	--	GO:0005634,nucleus; GO:0008270,zinc ion binding; GO:0009909,regulation of flower development; GO:0009416,response to light stimulus	B-box zinc finger
g54463	AP2/ERF-ERF	TF	AP2/ERF->AP2/ERF-ERF	1422	508	-1.487	down	LG13	24033887	24035154	-	--	--	K09286 EREBP-like factor | (RefSeq) ERF9; erf domain protein 9 (A)	PREDICTED: ethylene-responsive transcription factor 4-like [Ipomoea nil]	RecName: Full=Ethylene-responsive transcription factor 4; AltName: Full=Ethylene-responsive element-binding factor 3; Short=EREBP-3; AltName: Full=Ethylene-responsive element-binding factor 4 homolog; AltName: Full=NsERF3;	--	--	GO:0005634,nucleus; GO:0003677,DNA binding; GO:0003700,DNA-binding transcription factor activity; GO:0006952,defense response; GO:0009873,ethylene-activated signaling pathway; GO:0006351,transcription, DNA-templated	AP2 domain
g54469	GARP-G2-like	TF	GARP->GARP-G2-like	4696	630	-2.899	down	LG13	24060143	24063474	-	--	--	K14491 two-component response regulator ARR-B family | (RefSeq) RR18; response regulator 18 (A)	PREDICTED: transcription activator GLK1-like [Ipomoea nil]	RecName: Full=Transcription activator GLK1; AltName: Full=GBF'S PRO-RICH REGION-INTERACTING factor 1; AltName: Full=Golden2-like protein 1; Short=AtGLK1;	--	--	GO:0005634,nucleus; GO:0003677,DNA binding; GO:1900056,negative regulation of leaf senescence; GO:0006355,regulation of transcription, DNA-templated; GO:0006351,transcription, DNA-templated	Myb-like DNA-binding domain
g5453	SWI/SNF-BAF60b	TR	SWI/SNF-BAF60b	744	133	-2.477	down	LG2	8308645	8313388	+	--	--	K00799 glutathione S-transferase [EC:2.5.1.18] | (RefSeq) GSTF8; glutathione S-transferase phi 8 (A)	PREDICTED: glutathione S-transferase-like isoform X3 [Ipomoea nil]	RecName: Full=Glutathione S-transferase; EC=2.5.1.18; AltName: Full=25 kDa auxin-binding protein; AltName: Full=GST class-phi;	--	Glutathione S-transferase	GO:0004364,glutathione transferase activity; GO:0009734,auxin-activated signaling pathway	Glutathione S-transferase, C-terminal domain
g54532	HSF	TF	HSF	810	171	-2.243	down	LG13	24431169	24433206	+	--	--	K09419 heat shock transcription factor, other eukaryote | (RefSeq) RHA1; winged-helix DNA-binding transcription factor family protein (A)	PREDICTED: heat stress transcription factor A-4c-like [Ipomoea nil]	RecName: Full=Heat stress transcription factor A-4b; AltName: Full=Heat stress transcription factor 4; Short=OsHsf-04; AltName: Full=Heat stress transcription factor 9; Short=rHsf9;	--	Heat shock transcription factor	GO:0005737,cytoplasm; GO:0005634,nucleus; GO:0003700,DNA-binding transcription factor activity; GO:0043565,sequence-specific DNA binding; GO:0006351,transcription, DNA-templated	HSF-type DNA-binding
g54594	bHLH	TF	bHLH	187	398	1.089	up	LG13	24749750	24751199	-	--	--	K13422 transcription factor MYC2 | (RefSeq) MYC2; Basic helix-loop-helix (bHLH) DNA-binding family protein (A)	PREDICTED: transcription factor bHLH30-like [Ipomoea nil]	RecName: Full=Transcription factor bHLH30; AltName: Full=Basic helix-loop-helix protein 30; Short=AtbHLH30; Short=bHLH 30; AltName: Full=Transcription factor EN 53; AltName: Full=bHLH transcription factor bHLH030;	SubName: Full=Transcription factor bhlh30 {ECO:0000313|EMBL:OIT01228.1};	--	GO:0005634,nucleus; GO:0003677,DNA binding; GO:0003700,DNA-binding transcription factor activity; GO:0046983,protein dimerization activity; GO:0006355,regulation of transcription, DNA-templated; GO:0006351,transcription, DNA-templated	Helix-loop-helix DNA-binding domain
g54639	HSF	TF	HSF	840	169	-2.317	down	LG13	25048912	25050556	-	--	--	K09419 heat shock transcription factor, other eukaryote | (RefSeq) RHA1; winged-helix DNA-binding transcription factor family protein (A)	PREDICTED: heat stress transcription factor A-4c-like [Ipomoea nil]	RecName: Full=Heat stress transcription factor A-4c; Short=AtHsfA4c; AltName: Full=AtHsf-20; AltName: Full=Protein ROOT HANDEDNESS 1;	SubName: Full=Uncharacterized protein {ECO:0000313|EMBL:CCB47419.1};	Heat shock transcription factor	GO:0005634,nucleus; GO:0003700,DNA-binding transcription factor activity; GO:0043565,sequence-specific DNA binding; GO:0048530,fruit morphogenesis; GO:0048527,lateral root development; GO:0009958,positive gravitropism; GO:0009733,response to auxin; GO:0009408,response to heat; GO:0048364,root development; GO:0006351,transcription, DNA-templated	Protein of unknown function (DUF3450)
g54939	LOB	TF	LOB	100	209	1.061	up	LG13	26917431	26919154	-	--	--	K21994 LOB domain-containing protein 18 | (RefSeq) LBD18; LOB domain-containing protein 18 (A)	PREDICTED: LOB domain-containing protein 1-like [Ipomoea nil]	RecName: Full=LOB domain-containing protein 1; AltName: Full=ASYMMETRIC LEAVES 2-like protein 8; Short=AS2-like protein 8;	SubName: Full=Uncharacterized protein {ECO:0000313|EMBL:CDP04291.1};	--	GO:0005739,mitochondrion	Initiation control protein YabA
g5499	AP2/ERF-ERF	TF	AP2/ERF->AP2/ERF-ERF	2653	77	-5.103	down	LG2	8587655	8588927	+	--	--	K09286 EREBP-like factor | (RefSeq) EBP; ethylene-responsive element binding protein (A)	PREDICTED: ethylene-responsive transcription factor ERF071-like [Ipomoea nil]	RecName: Full=Ethylene-responsive transcription factor RAP2-3; AltName: Full=Cadmium-induced protein AS30; AltName: Full=Ethylene response factor 72; Short=ERF72; AltName: Full=Ethylene-responsive element binding protein; Short=AtEBP; AltName: Full=Protein RELATED TO APETALA2 3; Short=Related to AP2 3;	SubName: Full=ethylene-responsive transcription factor ERF071 {ECO:0000313|RefSeq:XP_016475776.1};	--	GO:0005737,cytoplasm; GO:0005634,nucleus; GO:0005886,plasma membrane; GO:0003677,DNA binding; GO:0003700,DNA-binding transcription factor activity; GO:0043565,sequence-specific DNA binding; GO:0008219,cell death; GO:0009873,ethylene-activated signaling pathway; GO:0010286,heat acclimation; GO:0045893,positive regulation of transcription, DNA-templated; GO:0009735,response to cytokinin; GO:0009723…	AP2 domain
g55036	Tify	TF	Tify	4888	1321	-1.888	down	LG13	27521003	27522993	+	--	--	K13464 jasmonate ZIM domain-containing protein | (RefSeq) JAZ1; jasmonate-zim-domain protein 1 (A)	PnFL-2 [Ipomoea batatas]	RecName: Full=Protein TIFY 10A; AltName: Full=Jasmonate ZIM domain-containing protein 1;	SubName: Full=PnFL-2 {ECO:0000313|EMBL:ABP35523.1};	--	GO:0005634,nucleus; GO:0003714,transcription corepressor activity; GO:0042742,defense response to bacterium; GO:0009908,flower development; GO:0009867,jasmonic acid mediated signaling pathway; GO:1903507,negative regulation of nucleic acid-templated transcription; GO:0009555,pollen development; GO:1900067,regulation of cellular response to alkaline pH; GO:0031347,regulation of defense response; G…	Divergent CCT motif
g5515	C2C2-GATA	TF	C2C2->C2C2-GATA	270	127	-1.081	down	LG2	8683628	8685132	-	--	--	--	PREDICTED: GATA transcription factor 16-like [Ipomoea nil]	RecName: Full=GATA transcription factor 16;	SubName: Full=Uncharacterized protein {ECO:0000313|EMBL:PIN01019.1};	GATA-4/5/6 transcription factors	GO:0005634,nucleus; GO:0005667,transcription factor complex; GO:0003682,chromatin binding; GO:0003700,DNA-binding transcription factor activity; GO:0000977,RNA polymerase II regulatory region sequence-specific DNA binding; GO:0001085,RNA polymerase II transcription factor binding; GO:0001228,DNA-binding transcription activator activity, RNA polymerase II-specific; GO:0008270,zinc ion binding; GO:…	GATA zinc finger
g55166	Tify	TF	Tify	611	144	-2.087	down	LG13	28358587	28360998	-	--	--	K13464 jasmonate ZIM domain-containing protein | (RefSeq) JAZ1; jasmonate-zim-domain protein 1 (A)	PREDICTED: protein TIFY 10A-like [Ipomoea nil]	RecName: Full=Protein TIFY 10A; AltName: Full=Jasmonate ZIM domain-containing protein 1;	SubName: Full=JAZ1 {ECO:0000313|EMBL:AMS24687.1}; Flags: Fragment;	--	GO:0005634,nucleus; GO:0003714,transcription corepressor activity; GO:0042742,defense response to bacterium; GO:0009908,flower development; GO:0009867,jasmonic acid mediated signaling pathway; GO:1903507,negative regulation of nucleic acid-templated transcription; GO:0009555,pollen development; GO:1900067,regulation of cellular response to alkaline pH; GO:0031347,regulation of defense response; G…	Divergent CCT motif
g55658	HB-HD-ZIP	TF	HB->HB-HD-ZIP	302	674	1.158	up	LG14	2019910	2024851	+	--	--	K09338 homeobox-leucine zipper protein | (RefSeq) HB-2; homeobox protein 2 (A)	PREDICTED: pentatricopeptide repeat-containing protein At5g47360-like [Ipomoea nil]	RecName: Full=Pentatricopeptide repeat-containing protein At5g47360;	SubName: Full=pentatricopeptide repeat-containing protein At5g47360-like {ECO:0000313|RefSeq:XP_009798766.1};	FOG: PPR repeat	GO:0043231,intracellular membrane-bounded organelle; GO:0004519,endonuclease activity; GO:0003723,RNA binding; GO:0009451,RNA modification	Tetratricopeptide repeat
g55828	OFP	TF	OFP	0	9	4.76	up	LG14	3476952	3479144	+	--	--	--	PREDICTED: transcription repressor OFP7-like isoform X1 [Ipomoea nil]	RecName: Full=Transcription repressor OFP8; AltName: Full=Ovate family protein 8; Short=AtOFP8;	SubName: Full=Uncharacterized protein {ECO:0000313|EMBL:CDP02824.1};	--	GO:0005634,nucleus; GO:0045892,negative regulation of transcription, DNA-templated; GO:0006351,transcription, DNA-templated	Transcriptional repressor, ovate
g57004	FAR1	TF	FAR1	4	22	2.486	up	LG14	11589341	11593949	-	--	--	K17604 zinc finger SWIM domain-containing protein 3 | (RefSeq) FRS8; FAR1-related sequence 8 (A)	PREDICTED: protein FAR1-RELATED SEQUENCE 5-like [Ipomoea nil]	RecName: Full=Protein FAR1-RELATED SEQUENCE 5;	SubName: Full=FAR1; Zinc finger, SWIM-type {ECO:0000313|EMBL:ABN05718.1};	--	GO:0005634,nucleus; GO:0008270,zinc ion binding; GO:0006355,regulation of transcription, DNA-templated	SWIM zinc finger
g57590	bHLH	TF	bHLH	9269	1101	-3.073	down	LG14	16079503	16081857	+	--	--	K12126 phytochrome-interacting factor 3 | (RefSeq) PIF3; phytochrome interacting factor 3 (A)	PREDICTED: transcription factor bHLH130-like [Ipomoea nil]	RecName: Full=Transcription factor bHLH130; AltName: Full=Basic helix-loop-helix protein 130; Short=AtbHLH130; Short=bHLH 130; AltName: Full=Transcription factor EN 69; AltName: Full=bHLH transcription factor bHLH130;	SubName: Full=Putative transcription factor bHLH-like {ECO:0000313|EMBL:JAP28611.1};	--	GO:0005634,nucleus; GO:0001046,core promoter sequence-specific DNA binding; GO:0003700,DNA-binding transcription factor activity; GO:0046983,protein dimerization activity; GO:0001228,DNA-binding transcription activator activity, RNA polymerase II-specific; GO:0048573,photoperiodism, flowering; GO:0006355,regulation of transcription, DNA-templated; GO:0006366,transcription by RNA polymerase II	Helix-loop-helix DNA-binding domain
g58120	Trihelix	TF	Trihelix	4688	3	-10.542	down	LG14	19950463	19952345	+	--	--	--	--	--	--	--	--	Myb/SANT-like DNA-binding domain
g58174	bZIP	TF	bZIP	17	1	-4.58	down	LG14	20423192	20425753	+	--	--	K14432 ABA responsive element binding factor | (RefSeq) ABI5; Basic-leucine zipper (bZIP) transcription factor family protein (A)	--	RecName: Full=Protein ABSCISIC ACID-INSENSITIVE 5; AltName: Full=Dc3 promoter-binding factor 1; Short=AtDPBF1; AltName: Full=Protein GROWTH-INSENSITIVITY TO ABA 1; AltName: Full=bZIP transcription factor 39; Short=AtbZIP39;	--	--	GO:0005634,nucleus; GO:0003677,DNA binding; GO:0003700,DNA-binding transcription factor activity; GO:0009738,abscisic acid-activated signaling pathway; GO:0010187,negative regulation of seed germination; GO:0045893,positive regulation of transcription, DNA-templated; GO:0006355,regulation of transcription, DNA-templated; GO:0009737,response to abscisic acid; GO:0010200,response to chitin; GO:0009…	bZIP Maf transcription factor
g58178	GARP-G2-like	TF	GARP->GARP-G2-like	166	559	1.754	up	LG14	20436702	20439177	-	--	--	K14491 two-component response regulator ARR-B family | (RefSeq) RR18; response regulator 18 (A)	--	RecName: Full=Myb-related protein 2 {ECO:0000303|PubMed:21255164}; AltName: Full=Myb family transcription factor PHL9 {ECO:0000305}; AltName: Full=Protein NITROGEN STARVATION RESPONSE 1 {ECO:0000303|PubMed:15592750}; Short=AtNSR1 {ECO:0000303|PubMed:15592750}; AltName: Full=Protein PHR1-LIKE 9 {ECO:0000305};	--	--	GO:0005634,nucleus; GO:0003677,DNA binding; GO:0003700,DNA-binding transcription factor activity; GO:0006351,transcription, DNA-templated	Myb-like DNA-binding domain
g58207	B3	TF	B3->B3	69	1	-5.671	down	LG14	20637085	20639913	-	--	--	K09287 RAV-like factor | (RefSeq) RAV1; related to ABI3/VP1 1 (A)	--	RecName: Full=B3 domain-containing protein At5g06250;	--	--	GO:0005634,nucleus; GO:0003677,DNA binding; GO:0003700,DNA-binding transcription factor activity; GO:0048366,leaf development; GO:0010358,leaf shaping; GO:0010073,meristem maintenance; GO:0045892,negative regulation of transcription, DNA-templated; GO:0006355,regulation of transcription, DNA-templated; GO:0006351,transcription, DNA-templated	B3 DNA binding domain
g58304	NF-YA	TF	NF-Y->NF-YA	11943	29537	1.306	up	LG14	21325774	21328908	+	--	--	K08064 nuclear transcription factor Y, alpha | (RefSeq) NF-YA10; nuclear factor Y, subunit A10 (A)	--	RecName: Full=Nuclear transcription factor Y subunit A-10; Short=AtNF-YA-10;	--	CCAAT-binding factor, subunit B (HAP2)	GO:0016602,CCAAT-binding factor complex; GO:0003677,DNA binding; GO:0003700,DNA-binding transcription factor activity; GO:0006351,transcription, DNA-templated	CCAAT-binding transcription factor (CBF-B/NF-YA) subunit B
g59046	GRAS	TF	GRAS	311	928	1.576	up	LG14	26283320	26286563	+	--	--	K14494 DELLA protein | (RefSeq) RGL1; RGA-like 1 (A)	PREDICTED: scarecrow-like protein 21 isoform X2 [Ipomoea nil]	RecName: Full=Scarecrow-like transcription factor PAT1; AltName: Full=GRAS family protein 29; Short=AtGRAS-29; AltName: Full=Protein PHYTOCHROME A SIGNAL TRANSDUCTION 1;	SubName: Full=Scarecrow-like transcription factor pat1 {ECO:0000313|EMBL:OIT00757.1};	--	GO:0005737,cytoplasm; GO:0005634,nucleus; GO:0003700,DNA-binding transcription factor activity; GO:0043565,sequence-specific DNA binding; GO:0004871,NA; GO:0009640,photomorphogenesis; GO:0006355,regulation of transcription, DNA-templated; GO:0006351,transcription, DNA-templated	GRAS domain family
g59133	B3-ARF	TF	B3->B3-ARF	784	1800	1.2	up	LG14	26832218	26837751	+	--	--	K14486 auxin response factor | (RefSeq) ETT; Transcriptional factor B3 family protein / auxin-responsive factor AUX/IAA-like protein (A)	PREDICTED: auxin response factor 3-like isoform X2 [Ipomoea nil]	RecName: Full=Auxin response factor 3; AltName: Full=Protein ETTIN;	RecName: Full=Auxin response factor {ECO:0000256|RuleBase:RU004561};	--	GO:0005634,nucleus; GO:0003677,DNA binding; GO:0003700,DNA-binding transcription factor activity; GO:0010158,abaxial cell fate specification; GO:0009850,auxin metabolic process; GO:0009734,auxin-activated signaling pathway; GO:0010582,floral meristem determinacy; GO:0009733,response to auxin; GO:0006351,transcription, DNA-templated; GO:0010050,vegetative phase change	B3 DNA binding domain
g59138	NAC	TF	NAC	172	361	1.072	up	LG14	26867610	26871743	-	--	--	--	PREDICTED: NAC domain-containing protein 73-like [Ipomoea nil]	RecName: Full=NAC domain-containing protein 73 {ECO:0000303|PubMed:15029955}; Short=ANAC073 {ECO:0000303|PubMed:15029955}; AltName: Full=Protein SECONDARY WALL-ASSOCIATED NAC DOMAIN PROTEIN 2 {ECO:0000303|PubMed:18952777};	SubName: Full=NAC domain-containing protein 73-like {ECO:0000313|RefSeq:XP_016491525.1};	--	GO:0005634,nucleus; GO:0003700,DNA-binding transcription factor activity; GO:0043565,sequence-specific DNA binding; GO:0044212,transcription regulatory region DNA binding; GO:0045893,positive regulation of transcription, DNA-templated; GO:2000652,regulation of secondary cell wall biogenesis; GO:0006351,transcription, DNA-templated	No apical meristem (NAM) protein
g59147	AP2/ERF-ERF	TF	AP2/ERF->AP2/ERF-ERF	3531	827	-2.094	down	LG14	26946438	26947635	+	--	--	K09286 EREBP-like factor | (RefSeq) ERF9; erf domain protein 9 (A)	PREDICTED: ethylene-responsive transcription factor 4-like [Ipomoea nil]	RecName: Full=Ethylene-responsive transcription factor 9; Short=AtERF9; AltName: Full=Ethylene-responsive element-binding factor 9; Short=EREBP-9;	SubName: Full=ERF9 {ECO:0000313|EMBL:AMS25577.1}; Flags: Fragment;	--	GO:0016020,membrane; GO:0005634,nucleus; GO:0003700,DNA-binding transcription factor activity; GO:0043565,sequence-specific DNA binding; GO:0006952,defense response; GO:0009873,ethylene-activated signaling pathway; GO:0019760,glucosinolate metabolic process; GO:0006351,transcription, DNA-templated	AP2 domain
g59148	AP2/ERF-ERF	TF	AP2/ERF->AP2/ERF-ERF	891	196	-2.184	down	LG14	26957399	26958498	-	--	--	K09286 EREBP-like factor | (RefSeq) ERF9; erf domain protein 9 (A)	PREDICTED: ethylene-responsive transcription factor 12 [Ipomoea nil]	RecName: Full=Ethylene-responsive transcription factor 12; Short=AtERF12; AltName: Full=Ethylene-responsive element-binding factor 12; Short=EREBP-12;	SubName: Full=Uncharacterized protein {ECO:0000313|EMBL:PIN06563.1};	--	GO:0005634,nucleus; GO:0003677,DNA binding; GO:0003700,DNA-binding transcription factor activity; GO:0006952,defense response; GO:0009873,ethylene-activated signaling pathway; GO:0006351,transcription, DNA-templated	AP2 domain
g59459	C3H	TF	C3H	255	115	-1.157	down	LG14	28792425	28795745	-	--	--	K11547 kinetochore protein NDC80 | (RefSeq) kinetochore protein (A)	PREDICTED: kinetochore protein ndc80 [Ipomoea nil]	--	SubName: Full=probable kinetochore protein NDC80 isoform X1 {ECO:0000313|RefSeq:XP_009786900.1};	Centromere-associated protein HEC1	--	HEC/Ndc80p family
g59614	LOB	TF	LOB	104	293	1.487	up	LG14	29585236	29586322	+	--	--	--	PREDICTED: LOB domain-containing protein 38-like [Ipomoea nil]	RecName: Full=LOB domain-containing protein 40; AltName: Full=ASYMMETRIC LEAVES 2-like protein 37; Short=AS2-like protein 37;	SubName: Full=Uncharacterized protein {ECO:0000313|EnsemblPlants:Solyc01g107190.2.1};	--	GO:0009739,response to gibberellin	Lateral organ boundaries (LOB) domain
g59766	SRS	TF	SRS	44	0	-6.885	down	LG14	30312643	30313838	-	--	--	--	--	RecName: Full=Protein SHORT INTERNODES;	SubName: Full=protein SHI RELATED SEQUENCE 3-like {ECO:0000313|RefSeq:XP_016461801.1};	--	GO:0005634,nucleus; GO:0003677,DNA binding; GO:0003700,DNA-binding transcription factor activity; GO:0046872,metal ion binding; GO:0046982,protein heterodimerization activity; GO:0009851,auxin biosynthetic process; GO:0009734,auxin-activated signaling pathway; GO:0009740,gibberellic acid mediated signaling pathway; GO:0007275,multicellular organism development; GO:0009938,negative regulation of g…	Domain of unknown function (DUF702)
g59794	bHLH	TF	bHLH	999	453	-1.141	down	LG14	30456595	30458770	-	--	--	--	--	RecName: Full=Transcription factor bHLH121; AltName: Full=Basic helix-loop-helix protein 121; Short=AtbHLH121; Short=bHLH 121; AltName: Full=Transcription factor EN 138; AltName: Full=bHLH transcription factor bHLH121;	SubName: Full=transcription factor bHLH121 {ECO:0000313|RefSeq:XP_009788103.1};	--	GO:0005634,nucleus; GO:0003700,DNA-binding transcription factor activity; GO:0046983,protein dimerization activity; GO:0043565,sequence-specific DNA binding; GO:0006351,transcription, DNA-templated	SWI5-dependent HO expression protein 3
g59927	E2F-DP	TF	E2F-DP	30	7	-1.973	down	LG15	428153	430584	-	--	--	K06620 transcription factor E2F3 | (RefSeq) E2F1; E2F transcription factor 1 (A)	--	RecName: Full=E2F transcription factor-like E2FE; AltName: Full=DP-E2F-like protein 1; AltName: Full=E2F-like repressor E2L3;	SubName: Full=Uncharacterized protein {ECO:0000313|EnsemblPlants:PGSC0003DMT400062861};	Transcription factor E2F/dimerization partner (TDP)-like proteins	GO:0005634,nucleus; GO:0005667,transcription factor complex; GO:0003677,DNA binding; GO:0003700,DNA-binding transcription factor activity; GO:0042023,DNA endoreduplication; GO:0032876,negative regulation of DNA endoreduplication; GO:0006351,transcription, DNA-templated	Sugar-specific transcriptional regulator TrmB
g60025	C2C2-Dof	TF	C2C2->C2C2-Dof	379	762	1.007	up	LG15	905850	909443	-	--	--	K16222 Dof zinc finger protein DOF5.5 | (RefSeq) CDF1; cycling DOF factor 1 (A)	--	RecName: Full=Dof zinc finger protein DOF5.4; Short=AtDOF5.4; AltName: Full=OBF-binding protein 4;	SubName: Full=Zf-Dof domain-containing protein {ECO:0000313|EMBL:GAV77351.1};	--	GO:0005634,nucleus; GO:0003700,DNA-binding transcription factor activity; GO:0046872,metal ion binding; GO:0044212,transcription regulatory region DNA binding; GO:0006355,regulation of transcription, DNA-templated; GO:0006351,transcription, DNA-templated	Mu-like prophage protein Com
g60059	AP2/ERF-ERF	TF	AP2/ERF->AP2/ERF-ERF	98	0	-8.057	down	LG15	1128517	1130595	+	--	--	K09286 EREBP-like factor | (RefSeq) RAP2.6; related to AP2 6 (A)	--	RecName: Full=Ethylene-responsive transcription factor ERF110;	SubName: Full=ethylene-responsive transcription factor ABR1-like isoform X1 {ECO:0000313|RefSeq:XP_016483059.1};	--	GO:0005634,nucleus; GO:0003677,DNA binding; GO:0003700,DNA-binding transcription factor activity; GO:0009873,ethylene-activated signaling pathway; GO:0045893,positive regulation of transcription, DNA-templated; GO:0048510,regulation of timing of transition from vegetative to reproductive phase; GO:0006351,transcription, DNA-templated	AP2 domain
g60072	AP2/ERF-ERF	TF	AP2/ERF->AP2/ERF-ERF	1964	4172	1.087	up	LG15	1221177	1226308	+	--	--	K09286 EREBP-like factor | (RefSeq) RAP2.4; related to AP2 4 (A)	--	RecName: Full=Ethylene-responsive transcription factor RAP2-4; AltName: Full=Ethylene-responsive transcription factor ERF059; AltName: Full=Protein RELATED TO APETALA2 4;	SubName: Full=ERF transcription factor 01 {ECO:0000313|EMBL:AHB33872.1};	--	GO:0005634,nucleus; GO:0003677,DNA binding; GO:0003700,DNA-binding transcription factor activity; GO:0043565,sequence-specific DNA binding; GO:0071472,cellular response to salt stress; GO:0009736,cytokinin-activated signaling pathway; GO:0009873,ethylene-activated signaling pathway; GO:0045595,regulation of cell differentiation; GO:0009409,response to cold; GO:0009416,response to light stimulus; …	AP2 domain
g60090	AP2/ERF-ERF	TF	AP2/ERF->AP2/ERF-ERF	858	1743	1.022	up	LG15	1352234	1360360	-	--	--	K09286 EREBP-like factor | (RefSeq) RAP2.4; related to AP2 4 (A)	--	RecName: Full=Ethylene-responsive transcription factor RAP2-4; AltName: Full=Ethylene-responsive transcription factor ERF059; AltName: Full=Protein RELATED TO APETALA2 4;	SubName: Full=Uncharacterized protein {ECO:0000313|EMBL:CCA66009.1};	FOG: Reverse transcriptase	GO:0005634,nucleus; GO:0003677,DNA binding; GO:0003700,DNA-binding transcription factor activity; GO:0043565,sequence-specific DNA binding; GO:0071472,cellular response to salt stress; GO:0009736,cytokinin-activated signaling pathway; GO:0009873,ethylene-activated signaling pathway; GO:0045595,regulation of cell differentiation; GO:0009409,response to cold; GO:0009416,response to light stimulus; …	AP2 domain
g60256	bHLH	TF	bHLH	2663	14	-7.573	down	LG15	2355159	2357339	+	--	--	K13422 transcription factor MYC2 | (RefSeq) MYC2; Basic helix-loop-helix (bHLH) DNA-binding family protein (A)	PREDICTED: transcription factor bHLH93-like [Ipomoea nil]	RecName: Full=Transcription factor bHLH93; AltName: Full=Basic helix-loop-helix protein 93; Short=AtbHLH93; Short=bHLH 93; AltName: Full=Transcription factor EN 47; AltName: Full=bHLH transcription factor bHLH093;	SubName: Full=transcription factor bHLH93-like {ECO:0000313|RefSeq:XP_016490472.1};	--	GO:0005634,nucleus; GO:0003677,DNA binding; GO:0003700,DNA-binding transcription factor activity; GO:0046983,protein dimerization activity; GO:0045487,gibberellin catabolic process; GO:0007275,multicellular organism development; GO:0010371,regulation of gibberellin biosynthetic process; GO:0006351,transcription, DNA-templated	Helix-loop-helix DNA-binding domain
g60377	MYB	TF	MYB->MYB	45	279	2.625	up	LG15	3146387	3147632	-	--	--	K09422 transcription factor MYB, plant | (RefSeq) MYB73; myb domain protein 73 (A)	PREDICTED: transcription factor MYB44-like isoform X2 [Ipomoea nil]	RecName: Full=Transcription factor MYB73 {ECO:0000303|PubMed:11597504}; AltName: Full=Myb-related protein 73 {ECO:0000303|PubMed:11597504}; Short=AtMYB73 {ECO:0000303|PubMed:11597504};	SubName: Full=MYB family protein {ECO:0000313|EMBL:AIT52202.1};	Transcription factor, Myb superfamily	GO:0005634,nucleus; GO:0003700,DNA-binding transcription factor activity; GO:0000981,DNA-binding transcription factor activity, RNA polymerase II-specific; GO:0043565,sequence-specific DNA binding; GO:0001135,RNA polymerase II transcription regulator recruiting activity; GO:0044212,transcription regulatory region DNA binding; GO:0030154,cell differentiation; GO:0019760,glucosinolate metabolic pro…	Myb DNA-binding like
g60387	WRKY	TF	WRKY	1173	518	-1.18	down	LG15	3205194	3206998	+	--	--	K13425 WRKY transcription factor 22 | (RefSeq) WRKY22; WRKY family transcription factor (A)	PREDICTED: probable WRKY transcription factor 7 [Ipomoea nil]	RecName: Full=Probable WRKY transcription factor 7; AltName: Full=WRKY DNA-binding protein 7;	SubName: Full=WRKY1 {ECO:0000313|EMBL:ACT55331.1};	--	GO:0005634,nucleus; GO:0005516,calmodulin binding; GO:0003700,DNA-binding transcription factor activity; GO:0043565,sequence-specific DNA binding; GO:0006351,transcription, DNA-templated	Plant zinc cluster domain
g60407	bZIP	TF	bZIP	302	782	1.374	up	LG15	3349448	3357226	-	--	--	K14432 ABA responsive element binding factor | (RefSeq) ABF2; abscisic acid responsive elements-binding factor 2 (A)	PREDICTED: ABSCISIC ACID-INSENSITIVE 5-like protein 5 [Ipomoea nil]	RecName: Full=ABSCISIC ACID-INSENSITIVE 5-like protein 5; AltName: Full=ABA-responsive element-binding protein 1; AltName: Full=Abscisic acid responsive elements-binding factor 2; Short=ABRE-binding factor 2; AltName: Full=bZIP transcription factor 36; Short=AtbZIP36;	SubName: Full=Transcription factor bzip {ECO:0000313|EMBL:AMA33775.1};	--	GO:0005634,nucleus; GO:0003677,DNA binding; GO:0003700,DNA-binding transcription factor activity; GO:0009738,abscisic acid-activated signaling pathway; GO:0006351,transcription, DNA-templated	bZIP Maf transcription factor
g60484	MYB-related	TF	MYB->MYB-related	36	7	-2.254	down	LG15	3813243	3815023	-	--	--	--	PREDICTED: protein RADIALIS-like 1 [Ipomoea nil]	RecName: Full=Protein RADIALIS-like 6; Short=AtRL6; Short=Protein RAD-like 6; AltName: Full=Protein RADIALIS-LIKE SANT/MYB 3; Short=Protein RSM3;	SubName: Full=Protein radialis-like 6 {ECO:0000313|EMBL:OIT04023.1};	Zuotin and related molecular chaperones (DnaJ superfamily), contains DNA-binding domains	GO:0005634,nucleus; GO:0003677,DNA binding; GO:0003700,DNA-binding transcription factor activity; GO:0006355,regulation of transcription, DNA-templated; GO:0006351,transcription, DNA-templated	Myb-like DNA-binding domain
g60524	DBB	TF	DBB	54	148	1.456	up	LG15	4038959	4041106	+	--	--	K12135 zinc finger protein CONSTANS | (RefSeq) CO; B-box type zinc finger protein with CCT domain-containing protein (A)	PREDICTED: B-box zinc finger protein 20-like [Ipomoea nil]	RecName: Full=B-box zinc finger protein 21 {ECO:0000303|PubMed:19920209}; Short=AtBBX21; AltName: Full=Protein LONG HYPOCOTYL UNDER SHADE {ECO:0000303|PubMed:21070414}; AltName: Full=Protein SALT TOLERANCE HOMOLOG 2;	SubName: Full=Uncharacterized protein {ECO:0000313|EnsemblPlants:Solyc04g081020.2.1};	--	GO:0005634,nucleus; GO:0003700,DNA-binding transcription factor activity; GO:0043565,sequence-specific DNA binding; GO:0000989,NA; GO:0008270,zinc ion binding; GO:0009640,photomorphogenesis; GO:0006355,regulation of transcription, DNA-templated; GO:0009641,shade avoidance; GO:0006351,transcription, DNA-templated	Predicted membrane protein (DUF2318)
g60532	bZIP	TF	bZIP	311	153	-1.022	down	LG15	4069439	4077856	+	--	--	K20929 glyoxal/methylglyoxal oxidase [EC:1.2.3.15] | (RefSeq) glyoxal oxidase-related protein (A)	PREDICTED: aldehyde oxidase GLOX-like [Ipomoea nil]	RecName: Full=Aldehyde oxidase GLOX1 {ECO:0000305}; EC=1.2.3.1 {ECO:0000305}; AltName: Full=Glyoxal oxidase 1 {ECO:0000305|PubMed:21673079}; Flags: Precursor;	SubName: Full=Aldehyde oxidase glox {ECO:0000313|EMBL:OIT22912.1};	--	GO:0005576,extracellular region; GO:0004031,aldehyde oxidase activity; GO:0102797,geranial:oxygen oxidoreductase activity; GO:0102798,heptaldehyde:oxygen oxidoreductase activity; GO:0007275,multicellular organism development	Galactose oxidase, central domain
g60589	LIM	TF	LIM	27	8	-1.696	down	LG15	4402918	4407320	-	--	--	--	PREDICTED: LIM domain-containing protein WLIM1-like [Ipomoea nil]	RecName: Full=LIM domain-containing protein WLIM1 {ECO:0000305}; AltName: Full=Widely-expressed LIM protein 1 {ECO:0000303|PubMed:11085265}; Short=AtWLIM1;	SubName: Full=LIM domain-containing protein WLIM1-like {ECO:0000313|RefSeq:XP_010272036.1};	Regulatory protein MLP and related LIM proteins	GO:0005737,cytoplasm; GO:0005856,cytoskeleton; GO:0005886,plasma membrane; GO:0051015,actin filament binding; GO:0046872,metal ion binding; GO:0003729,mRNA binding; GO:0051017,actin filament bundle assembly	Protein of unknown function (DUF2967)
g607	bHLH	TF	bHLH	49	1	-6.133	down	LG1	3422363	3427778	+	--	--	K20558 transcription factor SPEECHLESS | (RefSeq) SPCH; basic helix-loop-helix (bHLH) DNA-binding superfamily protein (A)	PREDICTED: transcription factor bHLH96-like [Ipomoea nil]	RecName: Full=Transcription factor bHLH94; AltName: Full=Basic helix-loop-helix protein 94; Short=AtbHLH94; Short=bHLH 94; AltName: Full=Transcription factor EN 16; AltName: Full=bHLH transcription factor bHLH094;	SubName: Full=transcription factor bHLH96-like {ECO:0000313|RefSeq:XP_016453539.1};	--	GO:0005634,nucleus; GO:0003677,DNA binding; GO:0003700,DNA-binding transcription factor activity; GO:0046983,protein dimerization activity; GO:0006355,regulation of transcription, DNA-templated; GO:0006351,transcription, DNA-templated	Helix-loop-helix DNA-binding domain
g60806	AP2/ERF-ERF	TF	AP2/ERF->AP2/ERF-ERF	1274	446	-1.517	down	LG15	5880493	5884612	-	--	--	K09284 AP2-like factor, euAP2 lineage | (RefSeq) RAP2.7; related to AP2.7 (A)	PREDICTED: ethylene-responsive transcription factor RAP2-7-like isoform X1 [Ipomoea nil]	RecName: Full=Ethylene-responsive transcription factor RAP2-7; AltName: Full=Protein RELATED TO APETALA2 7; AltName: Full=Protein TARGET OF EAT 1;	SubName: Full=ethylene-responsive transcription factor RAP2-7-like isoform X1 {ECO:0000313|RefSeq:XP_016475254.1};	--	GO:0005634,nucleus; GO:0003677,DNA binding; GO:0003700,DNA-binding transcription factor activity; GO:0009873,ethylene-activated signaling pathway; GO:0007275,multicellular organism development; GO:0006351,transcription, DNA-templated	AP2 domain
g60857	C2H2	TF	C2H2	13	0	-6.074	down	LG15	6231463	6232997	+	--	--	--	PREDICTED: zinc finger protein ZAT5-like [Ipomoea nil]	RecName: Full=Zinc finger protein ZAT11;	SubName: Full=zinc finger protein ZAT5 {ECO:0000313|RefSeq:XP_014512481.1};	FOG: Zn-finger	GO:0005634,nucleus; GO:0003700,DNA-binding transcription factor activity; GO:0046872,metal ion binding; GO:0003676,nucleic acid binding; GO:0071289,cellular response to nickel ion; GO:2000280,regulation of root development; GO:0006355,regulation of transcription, DNA-templated; GO:0010200,response to chitin; GO:0006351,transcription, DNA-templated	Zinc finger, C2H2 type
g60879	Tify	TF	Tify	967	289	-1.743	down	LG15	6376142	6377954	+	--	--	K13464 jasmonate ZIM domain-containing protein | (RefSeq) JAZ1; jasmonate-zim-domain protein 1 (A)	JAZ1 [Ipomoea batatas]	RecName: Full=Protein TIFY 10A; AltName: Full=Jasmonate ZIM domain-containing protein 1;	SubName: Full=JAZ1 {ECO:0000313|EMBL:APA19301.1};	--	GO:0005634,nucleus; GO:0003714,transcription corepressor activity; GO:0042742,defense response to bacterium; GO:0009908,flower development; GO:0009867,jasmonic acid mediated signaling pathway; GO:1903507,negative regulation of nucleic acid-templated transcription; GO:0009555,pollen development; GO:1900067,regulation of cellular response to alkaline pH; GO:0031347,regulation of defense response; G…	Divergent CCT motif
g60968	GRAS	TF	GRAS	148	332	1.171	up	LG15	6949527	6951220	-	--	--	K14494 DELLA protein | (RefSeq) RGL2; RGA-like 2 (A)	PREDICTED: nodulation-signaling pathway 1 protein [Ipomoea nil]	RecName: Full=Nodulation-signaling pathway 1 protein;	SubName: Full=GRAS16 protein {ECO:0000313|EMBL:AII20180.1};	--	GO:0005634,nucleus; GO:0042446,hormone biosynthetic process; GO:0009877,nodulation; GO:2000032,regulation of secondary shoot formation; GO:0006355,regulation of transcription, DNA-templated; GO:0006351,transcription, DNA-templated	GRAS domain family
g61121	GRAS	TF	GRAS	2976	38	-6.299	down	LG15	8012457	8015515	-	--	--	K14494 DELLA protein | (RefSeq) GAI; GRAS family transcription factor family protein (A)	PREDICTED: scarecrow-like protein 21 [Ipomoea nil]	RecName: Full=Chitin-inducible gibberellin-responsive protein 1;	SubName: Full=Chitin-inducible gibberellin-responsive protein 1 {ECO:0000313|EMBL:PHT44267.1};	--	GO:0005634,nucleus; GO:0003700,DNA-binding transcription factor activity; GO:0043565,sequence-specific DNA binding; GO:0006355,regulation of transcription, DNA-templated; GO:0006351,transcription, DNA-templated	GRAS domain family
g61321	NAC	TF	NAC	262	45	-2.548	down	LG15	9470831	9474085	-	--	--	--	PREDICTED: NAC domain-containing protein 21/22 [Ipomoea nil]	RecName: Full=NAC domain-containing protein 21/22; Short=ANAC021/ANAC022;	SubName: Full=NAC domain-containing protein 21/22-like isoform X2 {ECO:0000313|RefSeq:XP_016460549.1};	--	GO:0005634,nucleus; GO:0003677,DNA binding; GO:0003700,DNA-binding transcription factor activity; GO:0009734,auxin-activated signaling pathway; GO:0048527,lateral root development; GO:0010072,primary shoot apical meristem specification; GO:0006351,transcription, DNA-templated	No apical meristem (NAM) protein
g61322	NAC	TF	NAC	76	29	-1.383	down	LG15	9474546	9475205	-	--	--	--	PREDICTED: NAC domain-containing protein 21/22 [Ipomoea nil]	RecName: Full=NAC domain-containing protein 21/22; Short=ANAC021/ANAC022;	SubName: Full=NAC domain-containing protein 21/22 {ECO:0000313|EMBL:PHT77545.1}; Flags: Fragment;	--	GO:0005634,nucleus; GO:0003677,DNA binding; GO:0003700,DNA-binding transcription factor activity; GO:0009734,auxin-activated signaling pathway; GO:0048527,lateral root development; GO:0010072,primary shoot apical meristem specification; GO:0006351,transcription, DNA-templated	No apical meristem (NAM) protein
g61504	bHLH	TF	bHLH	345	59	-2.567	down	LG15	11061721	11063496	-	--	--	K12126 phytochrome-interacting factor 3 | (RefSeq) PIF3; phytochrome interacting factor 3 (A)	--	RecName: Full=Transcription factor BEE 1; AltName: Full=Basic helix-loop-helix protein 44; Short=AtbHLH44; Short=bHLH 44; AltName: Full=Protein Brassinosteroid enhanced expression 1; AltName: Full=Transcription factor EN 77; AltName: Full=bHLH transcription factor bHLH044;	SubName: Full=transcription factor BEE 3-like {ECO:0000313|RefSeq:XP_016497820.1};	--	GO:0005634,nucleus; GO:0003677,DNA binding; GO:0003700,DNA-binding transcription factor activity; GO:0046983,protein dimerization activity; GO:1902448,positive regulation of shade avoidance; GO:0006355,regulation of transcription, DNA-templated; GO:0006351,transcription, DNA-templated	Helix-loop-helix DNA-binding domain
g61768	C2H2	TF	C2H2	319	146	-1.132	down	LG15	13149762	13150865	+	--	--	--	--	RecName: Full=Zinc finger protein 1 {ECO:0000305}; Short=AtZFP1 {ECO:0000303|PubMed:8980531};	--	--	GO:0005634,nucleus; GO:0003700,DNA-binding transcription factor activity; GO:0046872,metal ion binding; GO:0003676,nucleic acid binding; GO:0009738,abscisic acid-activated signaling pathway; GO:0009788,negative regulation of abscisic acid-activated signaling pathway; GO:0009640,photomorphogenesis	C2H2-type zinc finger
g63073	MYB-related	TF	MYB->MYB-related	432	156	-1.464	down	LG15	23310169	23318221	-	--	--	K09422 transcription factor MYB, plant | (RefSeq) MYB3R-5; myb domain protein 3r-5 (A)	PREDICTED: myb-related protein 3R-1 [Ipomoea nil]	RecName: Full=Transcription factor MYB3R-4 {ECO:0000303|PubMed:11597504}; AltName: Full=Myb-related protein 3R-4 {ECO:0000303|PubMed:11597504}; AltName: Full=Protein ENHANCED DEFECTIVE CYTOKINESIS {ECO:0000303|PubMed:25806785};	SubName: Full=Myb {ECO:0000313|EMBL:BAB70511.1};	Transcription factor, Myb superfamily	GO:0005634,nucleus; GO:0003700,DNA-binding transcription factor activity; GO:0000981,DNA-binding transcription factor activity, RNA polymerase II-specific; GO:0043565,sequence-specific DNA binding; GO:0003713,transcription coactivator activity; GO:0001135,RNA polymerase II transcription regulator recruiting activity; GO:0044212,transcription regulatory region DNA binding; GO:0030154,cell differen…	--
g63231	MADS-M-type	TF	MADS->MADS-M-type	79	31	-1.364	down	LG15	24436848	24438511	-	--	--	K09264 MADS-box transcription factor, plant | (RefSeq) AGL6; AGAMOUS-like 6 (A)	PREDICTED: agamous-like MADS-box protein AGL61 [Ipomoea nil]	RecName: Full=Agamous-like MADS-box protein AGL61; AltName: Full=Protein DIANA;	SubName: Full=Uncharacterized protein {ECO:0000313|EMBL:CDO97319.1};	MADS box transcription factor	GO:0005634,nucleus; GO:0043078,polar nucleus; GO:0003700,DNA-binding transcription factor activity; GO:0046983,protein dimerization activity; GO:0000977,RNA polymerase II regulatory region sequence-specific DNA binding; GO:0009559,embryo sac central cell differentiation; GO:0045944,positive regulation of transcription by RNA polymerase II; GO:0006351,transcription, DNA-templated	SRF-type transcription factor (DNA-binding and dimerisation domain)
g633	bHLH	TF	bHLH	138	19	-2.873	down	LG1	3626308	3627987	-	--	--	K20558 transcription factor SPEECHLESS | (RefSeq) SPCH; basic helix-loop-helix (bHLH) DNA-binding superfamily protein (A)	--	RecName: Full=Transcription factor bHLH96; AltName: Full=Basic helix-loop-helix protein 96; Short=AtbHLH96; Short=bHLH 96; AltName: Full=Transcription factor EN 15; AltName: Full=bHLH transcription factor bHLH096;	SubName: Full=transcription factor bHLH96-like {ECO:0000313|RefSeq:XP_009784356.1};	--	GO:0005634,nucleus; GO:0003677,DNA binding; GO:0003700,DNA-binding transcription factor activity; GO:0046983,protein dimerization activity; GO:0006351,transcription, DNA-templated	Helix-loop-helix DNA-binding domain
g64099	GRAS	TF	GRAS	9	58	2.649	up	LG15	30675765	30678385	+	--	--	K14494 DELLA protein | (RefSeq) RGL1; RGA-like 1 (A)	--	RecName: Full=DELLA protein GAI1; AltName: Full=Gibberellic acid-insensitive mutant protein 1; AltName: Full=VvGAI1;	--	--	GO:0005634,nucleus; GO:0000989,NA; GO:0009740,gibberellic acid mediated signaling pathway; GO:0006355,regulation of transcription, DNA-templated; GO:0006351,transcription, DNA-templated	GRAS domain family
g64138	SET	TR	SET	274	61	-2.174	down	LG15	30904767	30915950	+	--	--	K11420 euchromatic histone-lysine N-methyltransferase [EC:2.1.1.43] | (RefSeq) SUVH4; histone-lysine N-methyltransferase, H3 lysine-9 specific SUVH4-like protein (A)	--	RecName: Full=Histone-lysine N-methyltransferase, H3 lysine-9 specific SUVH4; EC=2.1.1.43; AltName: Full=Histone H3-K9 methyltransferase 4; Short=H3-K9-HMTase 4; AltName: Full=Protein KRYPTONITE; AltName: Full=Protein SET DOMAIN GROUP 33; AltName: Full=Suppressor of variegation 3-9 homolog protein 4; Short=Su(var)3-9 homolog protein 4;	--	Histone H3 (Lys9) methyltransferase SUV39H1/Clr4, required for transcriptional silencing	GO:0000775,chromosome, centromeric region; GO:0005634,nucleus; GO:0010385,double-stranded methylated DNA binding; GO:0046974,histone methyltransferase activity (H3-K9 specific); GO:0008327,methyl-CpG binding; GO:0010428,methyl-CpNpG binding; GO:0010429,methyl-CpNpN binding; GO:0008270,zinc ion binding; GO:0051567,histone H3-K9 methylation; GO:0016571,histone methylation; GO:0010216,maintenance of…	Pre-SET motif
g670	AP2/ERF-ERF	TF	AP2/ERF->AP2/ERF-ERF	8892	4302	-1.047	down	LG1	3913997	3915744	-	--	--	K09286 EREBP-like factor | (RefSeq) RAP2.4; related to AP2 4 (A)	PREDICTED: ethylene-responsive transcription factor RAP2-4-like [Ipomoea nil]	RecName: Full=Ethylene-responsive transcription factor RAP2-4; AltName: Full=Ethylene-responsive transcription factor ERF059; AltName: Full=Protein RELATED TO APETALA2 4;	SubName: Full=ERF transcription factor 02 {ECO:0000313|EMBL:AHB33873.1};	--	GO:0005634,nucleus; GO:0003677,DNA binding; GO:0003700,DNA-binding transcription factor activity; GO:0043565,sequence-specific DNA binding; GO:0071472,cellular response to salt stress; GO:0009736,cytokinin-activated signaling pathway; GO:0009873,ethylene-activated signaling pathway; GO:0045595,regulation of cell differentiation; GO:0009409,response to cold; GO:0009416,response to light stimulus; …	AP2 domain
g7739	bHLH	TF	bHLH	1377	345	-1.996	down	LG2	25846053	25850544	-	--	--	K12126 phytochrome-interacting factor 3 | (RefSeq) PIF3; phytochrome interacting factor 3 (A)	PREDICTED: transcription factor bHLH128-like [Ipomoea nil]	RecName: Full=Transcription factor bHLH128; AltName: Full=Basic helix-loop-helix protein 128; Short=AtbHLH128; Short=bHLH 128; AltName: Full=Transcription factor EN 74; AltName: Full=bHLH transcription factor bHLH128;	SubName: Full=Transcription factor {ECO:0000313|EMBL:PHT63827.1};	--	GO:0005829,cytosol; GO:0005634,nucleus; GO:0001046,core promoter sequence-specific DNA binding; GO:0003700,DNA-binding transcription factor activity; GO:0046983,protein dimerization activity; GO:0044212,transcription regulatory region DNA binding; GO:0001228,DNA-binding transcription activator activity, RNA polymerase II-specific; GO:0010119,regulation of stomatal movement; GO:0006355,regulation …	Helix-loop-helix DNA-binding domain
g8319	AP2/ERF-ERF	TF	AP2/ERF->AP2/ERF-ERF	54	1	-6.286	down	LG2	30442967	30444119	-	--	--	K14516 ethylene-responsive transcription factor 1 | (RefSeq) ERF1; ethylene response factor 1 (A)	PREDICTED: ethylene-responsive transcription factor 1B-like [Ipomoea nil]	RecName: Full=Ethylene-responsive transcription factor 1B; Short=AtERF1B; AltName: Full=Ethylene-responsive element-binding factor 1B; Short=EREBP-1B;	--	--	GO:0005634,nucleus; GO:0003677,DNA binding; GO:0003700,DNA-binding transcription factor activity; GO:0006952,defense response; GO:0009873,ethylene-activated signaling pathway; GO:0009867,jasmonic acid mediated signaling pathway; GO:0006351,transcription, DNA-templated	Fibrinogen alpha/beta chain family
g8333	Others	TR	Others	1072	119	-3.169	down	LG2	30588708	30592374	+	--	--	K14509 ethylene receptor [EC:2.7.13.-] | (RefSeq) ETR2; Signal transduction histidine kinase, hybrid-type, ethylene sensor (A)	PREDICTED: ethylene receptor 2-like [Ipomoea nil]	RecName: Full=Ethylene receptor 2; Short=AtETR2; EC=2.7.11.-; AltName: Full=Protein ETHYLENE RESPONSE 2; AltName: Full=Protein ETR2;	--	Sensory transduction histidine kinase	GO:0005783,endoplasmic reticulum; GO:0005789,endoplasmic reticulum membrane; GO:0016021,integral component of membrane; GO:0005524,ATP binding; GO:0051740,ethylene binding; GO:0038199,ethylene receptor activity; GO:0046872,metal ion binding; GO:0000155,phosphorelay sensor kinase activity; GO:0004674,protein serine/threonine kinase activity; GO:0004872,NA; GO:0010105,negative regulation of ethylen…	Histidine kinase-, DNA gyrase B-, and HSP90-like ATPase
g8401	Others	TR	Others	631	47	-3.74	down	LG2	31037342	31040981	-	--	--	K14509 ethylene receptor [EC:2.7.13.-] | (RefSeq) ETR2; Signal transduction histidine kinase, hybrid-type, ethylene sensor (A)	PREDICTED: ethylene receptor 2-like [Ipomoea nil]	RecName: Full=Ethylene receptor 2; Short=AtETR2; EC=2.7.11.-; AltName: Full=Protein ETHYLENE RESPONSE 2; AltName: Full=Protein ETR2;	RecName: Full=Ethylene receptor {ECO:0000256|PIRNR:PIRNR026389};	Sensory transduction histidine kinase	GO:0005783,endoplasmic reticulum; GO:0005789,endoplasmic reticulum membrane; GO:0016021,integral component of membrane; GO:0005524,ATP binding; GO:0051740,ethylene binding; GO:0038199,ethylene receptor activity; GO:0046872,metal ion binding; GO:0000155,phosphorelay sensor kinase activity; GO:0004674,protein serine/threonine kinase activity; GO:0004872,NA; GO:0010105,negative regulation of ethylen…	Histidine kinase-, DNA gyrase B-, and HSP90-like ATPase
g8790	WRKY	TF	WRKY	232	763	1.718	up	LG2	33728711	33731145	+	--	--	K18834 WRKY transcription factor 1 | (RefSeq) ZAP1; zinc-dependent activator protein-1 (A)	PREDICTED: WRKY transcription factor 44-like [Ipomoea nil]	RecName: Full=Probable WRKY transcription factor 3; AltName: Full=WRKY DNA-binding protein 3;	SubName: Full=Transcription factor WRKY26 {ECO:0000313|EMBL:AQM37647.1};	--	GO:0005634,nucleus; GO:0003700,DNA-binding transcription factor activity; GO:0043565,sequence-specific DNA binding; GO:0006351,transcription, DNA-templated	WRKY DNA -binding domain
g8988	HB-HD-ZIP	TF	HB->HB-HD-ZIP	269	82	-1.716	down	LG2	34934052	34935648	-	--	--	K09338 homeobox-leucine zipper protein | (RefSeq) HAT14; homeobox leucine zipper protein (A)	PREDICTED: homeobox-leucine zipper protein HOX11-like [Ipomoea nil]	RecName: Full=Homeobox-leucine zipper protein HOX27; AltName: Full=HD-ZIP protein HOX27; AltName: Full=Homeodomain transcription factor HOX27; AltName: Full=OsHox27;	SubName: Full=Uncharacterized protein {ECO:0000313|EnsemblPlants:Solyc01g073910.2.1};	Transcription factor HEX, contains HOX and HALZ domains	GO:0005634,nucleus; GO:0003700,DNA-binding transcription factor activity; GO:0043565,sequence-specific DNA binding; GO:0006351,transcription, DNA-templated	Homeobox KN domain
g9121	HB-HD-ZIP	TF	HB->HB-HD-ZIP	10	137	3.845	up	LG2	35763546	35765798	-	--	--	K09338 homeobox-leucine zipper protein | (RefSeq) HB-2; homeobox protein 2 (A)	PREDICTED: homeobox-leucine zipper protein HAT4-like [Ipomoea nil]	RecName: Full=Homeobox-leucine zipper protein HAT4; AltName: Full=HD-ZIP protein ATHB-2; AltName: Full=Homeodomain transcription factor ATHB-2; AltName: Full=Homeodomain-leucine zipper protein HAT4; Short=HD-ZIP protein 4;	SubName: Full=Transcription factor HEX {ECO:0000313|EMBL:PIN20681.1};	Transcription factor HEX, contains HOX and HALZ domains	GO:0005634,nucleus; GO:0003700,DNA-binding transcription factor activity; GO:0042803,protein homodimerization activity; GO:0043565,sequence-specific DNA binding; GO:0008283,cell proliferation; GO:0045892,negative regulation of transcription, DNA-templated; GO:0010017,red or far-red light signaling pathway; GO:0009585,red, far-red light phototransduction; GO:0009733,response to auxin; GO:0009735,r…	Homeobox KN domain
g933	WRKY	TF	WRKY	29	3	-3.262	down	LG1	5449496	5451626	+	--	--	K16225 probable WRKY transcription factor 52 | (RefSeq) RRS1; Disease resistance protein (TIR-NBS-LRR class) (A)	PREDICTED: probable WRKY transcription factor 53 [Ipomoea nil]	RecName: Full=Probable WRKY transcription factor 41; AltName: Full=WRKY DNA-binding protein 41;	SubName: Full=Uncharacterized protein {ECO:0000313|EMBL:CDP05092.1};	--	GO:0005634,nucleus; GO:0003700,DNA-binding transcription factor activity; GO:0043565,sequence-specific DNA binding; GO:0006351,transcription, DNA-templated	WRKY DNA -binding domain
g9465	AP2/ERF-ERF	TF	AP2/ERF->AP2/ERF-ERF	1748	54	-5.027	down	LG3	228810	229913	-	--	--	K09286 EREBP-like factor | (RefSeq) EBP; ethylene-responsive element binding protein (A)	PREDICTED: ethylene-responsive transcription factor ERF071-like [Ipomoea nil]	RecName: Full=Ethylene-responsive transcription factor RAP2-3; AltName: Full=Cadmium-induced protein AS30; AltName: Full=Ethylene response factor 72; Short=ERF72; AltName: Full=Ethylene-responsive element binding protein; Short=AtEBP; AltName: Full=Protein RELATED TO APETALA2 3; Short=Related to AP2 3;	SubName: Full=Ethylene responsive factor {ECO:0000313|EMBL:AGU44838.1};	--	GO:0005737,cytoplasm; GO:0005634,nucleus; GO:0005886,plasma membrane; GO:0003677,DNA binding; GO:0003700,DNA-binding transcription factor activity; GO:0043565,sequence-specific DNA binding; GO:0008219,cell death; GO:0009873,ethylene-activated signaling pathway; GO:0010286,heat acclimation; GO:0045893,positive regulation of transcription, DNA-templated; GO:0009735,response to cytokinin; GO:0009723…	AP2 domain
g9621	bHLH	TF	bHLH	99	6	-4.092	down	LG3	1373692	1376000	+	--	--	K13422 transcription factor MYC2 | (RefSeq) MYC2; Basic helix-loop-helix (bHLH) DNA-binding family protein (A)	--	RecName: Full=Transcription factor bHLH3; AltName: Full=Basic helix-loop-helix protein 3; Short=AtbHLH3; Short=bHLH 3; AltName: Full=Transcription factor EN 34; AltName: Full=bHLH transcription factor bHLH003;	--	--	GO:0005634,nucleus; GO:0003677,DNA binding; GO:0003700,DNA-binding transcription factor activity; GO:0046983,protein dimerization activity; GO:0010629,negative regulation of gene expression; GO:0006355,regulation of transcription, DNA-templated; GO:0006351,transcription, DNA-templated	Helix-loop-helix DNA-binding domain
g9624	bHLH	TF	bHLH	491	18	-4.794	down	LG3	1406082	1408366	+	--	--	K13422 transcription factor MYC2 | (RefSeq) MYC2; Basic helix-loop-helix (bHLH) DNA-binding family protein (A)	--	RecName: Full=Transcription factor bHLH3; AltName: Full=Basic helix-loop-helix protein 3; Short=AtbHLH3; Short=bHLH 3; AltName: Full=Transcription factor EN 34; AltName: Full=bHLH transcription factor bHLH003;	--	--	GO:0005634,nucleus; GO:0003677,DNA binding; GO:0003700,DNA-binding transcription factor activity; GO:0046983,protein dimerization activity; GO:0010629,negative regulation of gene expression; GO:0006355,regulation of transcription, DNA-templated; GO:0006351,transcription, DNA-templated	Helix-loop-helix DNA-binding domain
g9633	AP2/ERF-ERF	TF	AP2/ERF->AP2/ERF-ERF	36	2	-3.979	down	LG3	1488412	1489148	+	--	--	K14516 ethylene-responsive transcription factor 1 | (RefSeq) ERF1; ethylene response factor 1 (A)	--	RecName: Full=Ethylene-responsive transcription factor 1B; Short=AtERF1B; AltName: Full=Ethylene-responsive element-binding factor 1B; Short=EREBP-1B;	--	--	GO:0005634,nucleus; GO:0003677,DNA binding; GO:0003700,DNA-binding transcription factor activity; GO:0006952,defense response; GO:0009873,ethylene-activated signaling pathway; GO:0009867,jasmonic acid mediated signaling pathway; GO:0006351,transcription, DNA-templated	Spermatozal protamine family
g9635	MYB	TF	MYB->MYB	94	11	-3.044	down	LG3	1493852	1496397	+	--	--	K09422 transcription factor MYB, plant | (RefSeq) MYB15; myb domain protein 15 (A)	--	RecName: Full=Transcription factor MYB15 {ECO:0000305}; AltName: Full=Myb-related protein 15 {ECO:0000305}; Short=AtMYB15 {ECO:0000312|EMBL:CAA74603.1}; AltName: Full=Myb-related protein Y19 {ECO:0000305}; Short=AtY19 {ECO:0000303|PubMed:8980549};	--	Transcription factor, Myb superfamily	GO:0005634,nucleus; GO:0003700,DNA-binding transcription factor activity; GO:0000981,DNA-binding transcription factor activity, RNA polymerase II-specific; GO:0043565,sequence-specific DNA binding; GO:0001135,RNA polymerase II transcription regulator recruiting activity; GO:0044212,transcription regulatory region DNA binding; GO:0030154,cell differentiation; GO:0006357,regulation of transcription…	SLIDE
g980	MYB	TF	MYB->MYB	10	46	2.191	up	LG1	5711525	5715108	-	--	--	K09422 transcription factor MYB, plant | (RefSeq) MYB17; myb domain protein 17 (A)	--	RecName: Full=Transcription factor MYB41 {ECO:0000305}; AltName: Full=Myb-related protein 41 {ECO:0000303|PubMed:11597504}; Short=AtMYB41 {ECO:0000303|PubMed:11597504}; AltName: Full=Protein LATE MERISTEM IDENTITY 2;	--	Transcription factor, Myb superfamily	GO:0005634,nucleus; GO:0003700,DNA-binding transcription factor activity; GO:0000981,DNA-binding transcription factor activity, RNA polymerase II-specific; GO:0043565,sequence-specific DNA binding; GO:0001135,RNA polymerase II transcription regulator recruiting activity; GO:0044212,transcription regulatory region DNA binding; GO:0030154,cell differentiation; GO:0009908,flower development; GO:0009…	Myb-like DNA-binding domain
g9812	bHLH	TF	bHLH	277	86	-1.687	down	LG3	2583562	2586854	-	--	--	K12126 phytochrome-interacting factor 3 | (RefSeq) PIF3; phytochrome interacting factor 3 (A)	--	RecName: Full=Transcription factor bHLH62; AltName: Full=Basic helix-loop-helix protein 62; Short=AtbHLH62; Short=bHLH 62; AltName: Full=Transcription factor EN 85; AltName: Full=bHLH transcription factor bHLH062;	--	--	GO:0005634,nucleus; GO:0003677,DNA binding; GO:0003700,DNA-binding transcription factor activity; GO:0046983,protein dimerization activity; GO:0006355,regulation of transcription, DNA-templated; GO:0006351,transcription, DNA-templated	Helix-loop-helix DNA-binding domain
g9874	LOB	TF	LOB	30	169	2.499	up	LG3	3005283	3007545	-	--	--	K13944 LOB domain-containing protein 16 | (RefSeq) LBD16; lateral organ boundaries-domain 16 (A)	--	RecName: Full=LOB domain-containing protein 12; AltName: Full=ASYMMETRIC LEAVES 2-like protein 5; Short=AS2-like protein 5;	--	--	GO:0003677,DNA binding; GO:0009965,leaf morphogenesis; GO:0010016,shoot system morphogenesis	Lateral organ boundaries (LOB) domain
g9883	AP2/ERF-ERF	TF	AP2/ERF->AP2/ERF-ERF	276	118	-1.221	down	LG3	3065180	3066871	+	--	--	K09286 EREBP-like factor | (RefSeq) ERF10; ERF domain protein 10 (A)	--	RecName: Full=Pathogenesis-related genes transcriptional activator PTI6; AltName: Full=PTO-interacting protein 6;	--	--	GO:0005634,nucleus; GO:0003677,DNA binding; GO:0003700,DNA-binding transcription factor activity; GO:0006952,defense response; GO:0006351,transcription, DNA-templated	AP2 domain
g9904	WRKY	TF	WRKY	4053	1073	-1.917	down	LG3	3233914	3236927	+	--	--	K13424 WRKY transcription factor 33 | (RefSeq) WRKY33; WRKY DNA-binding protein 33 (A)	--	RecName: Full=WRKY transcription factor WRKY24 {ECO:0000303|PubMed:15047897}; Short=OsWRKY24 {ECO:0000303|PubMed:15047897};	--	--	GO:0005634,nucleus; GO:0003700,DNA-binding transcription factor activity; GO:0043565,sequence-specific DNA binding; GO:0009738,abscisic acid-activated signaling pathway; GO:0009740,gibberellic acid mediated signaling pathway; GO:0009788,negative regulation of abscisic acid-activated signaling pathway; GO:0009938,negative regulation of gibberellic acid mediated signaling pathway; GO:0045893,positi…	WRKY DNA -binding domain
g9997	GRAS	TF	GRAS	8606	2862	-1.588	down	LG3	3893618	3895829	-	--	--	K14494 DELLA protein | (RefSeq) RGL2; RGA-like 2 (A)	--	RecName: Full=Scarecrow-like protein 11; Short=AtSCL11; AltName: Full=GRAS family protein 31; Short=AtGRAS-31;	--	--	GO:0005634,nucleus; GO:0003700,DNA-binding transcription factor activity; GO:0043565,sequence-specific DNA binding; GO:0006355,regulation of transcription, DNA-templated; GO:0010200,response to chitin; GO:0006351,transcription, DNA-templated	GRAS domain family

## Sheet: S19-S2_vs_S19-S4
ID	Family	Category	Classification	S19S2	S19S4	log2FoldChange	regulated	chr	start	end	strand	gene_name	gene_description	KEGG	NR	Swissprot	Tremble	KOG	GO	Pfam
g10337	C2H2	TF	C2H2	1	16	3.49	up	LG3	6452712	6454626	+	--	--	--	PREDICTED: zinc finger protein ZAT5-like [Ipomoea nil]	RecName: Full=Zinc finger protein ZAT5;	SubName: Full=Uncharacterized protein {ECO:0000313|EnsemblPlants:PGSC0003DMT400001104};	FOG: Zn-finger	GO:0005634,nucleus; GO:0003700,DNA-binding transcription factor activity; GO:0046872,metal ion binding; GO:0043565,sequence-specific DNA binding; GO:0006355,regulation of transcription, DNA-templated; GO:0006351,transcription, DNA-templated	Zinc-finger double domain
g1049	GNAT	TR	GNAT	71	145	1.017	up	LG1	6143181	6145172	-	--	--	--	PREDICTED: probable N-acetyltransferase HLS1 [Ipomoea nil]	RecName: Full=Probable N-acetyltransferase HLS1; EC=2.3.1.-; AltName: Full=Protein CONSTITUTIVE PHOTOMORPHOGENIC 3; AltName: Full=Protein HOOKLESS 1; AltName: Full=Protein UNUSUAL SUGAR RESPONSE 2;	SubName: Full=Uncharacterized protein {ECO:0000313|EMBL:PIN25698.1};	--	GO:0008080,N-acetyltransferase activity; GO:0016747,transferase activity, transferring acyl groups other than amino-acyl groups; GO:0009734,auxin-activated signaling pathway; GO:0009640,photomorphogenesis; GO:0006473,protein acetylation; GO:0040008,regulation of growth; GO:0009723,response to ethylene; GO:0009826,unidimensional cell growth	Acetyltransferase (GNAT) domain
g10759	NAC	TF	NAC	89	33	-1.413	down	LG3	9795735	9808247	+	--	--	K09841 xanthoxin dehydrogenase [EC:1.1.1.288] | (RefSeq) ABA2; NAD(P)-binding Rossmann-fold superfamily protein (A)	PREDICTED: NAC domain-containing protein 60-like [Ipomoea nil]	RecName: Full=NAC domain-containing protein 89; Short=ANAC089; AltName: Full=Protein FRUCTOSE-SENSING QUANTITATIVE TRAIT LOCUS 6;	SubName: Full=NAC domain-containing protein 40 {ECO:0000313|EMBL:PHT30127.1};	--	GO:0005783,endoplasmic reticulum; GO:0005634,nucleus; GO:0003677,DNA binding; GO:0003700,DNA-binding transcription factor activity; GO:0009910,negative regulation of flower development; GO:0009626,plant-type hypersensitive response; GO:0045893,positive regulation of transcription, DNA-templated; GO:0034976,response to endoplasmic reticulum stress; GO:0006351,transcription, DNA-templated	No apical meristem (NAM) protein
g10806	NAC	TF	NAC	138	62	-1.152	down	LG3	10186056	10191242	-	--	--	K09841 xanthoxin dehydrogenase [EC:1.1.1.288] | (RefSeq) ABA2; NAD(P)-binding Rossmann-fold superfamily protein (A)	PREDICTED: NAC domain-containing protein 60-like [Ipomoea nil]	RecName: Full=NAC domain-containing protein 60 {ECO:0000303|PubMed:15029955}; Short=ANAC060 {ECO:0000303|PubMed:15029955}; AltName: Full=Protein NTM1-like 5 {ECO:0000303|PubMed:17158162};	SubName: Full=NAC domain-containing protein 40 {ECO:0000313|EMBL:PHT30127.1};	--	GO:0016021,integral component of membrane; GO:0005634,nucleus; GO:0003677,DNA binding; GO:0003700,DNA-binding transcription factor activity; GO:0071333,cellular response to glucose stimulus; GO:0006351,transcription, DNA-templated	No apical meristem (NAM) protein
g1131	C2C2-Dof	TF	C2C2->C2C2-Dof	279	109	-1.35	down	LG1	6777897	6779213	-	--	--	K16222 Dof zinc finger protein DOF5.5 | (RefSeq) CDF1; cycling DOF factor 1 (A)	PREDICTED: dof zinc finger protein DOF2.4-like [Ipomoea nil]	RecName: Full=Dof zinc finger protein DOF5.3; Short=AtDOF5.3;	--	--	GO:0005634,nucleus; GO:0003700,DNA-binding transcription factor activity; GO:0046872,metal ion binding; GO:0044212,transcription regulatory region DNA binding; GO:0006355,regulation of transcription, DNA-templated; GO:0048364,root development; GO:0006351,transcription, DNA-templated	Dof domain, zinc finger
g11502	bHLH	TF	bHLH	105	21	-2.309	down	LG3	15347384	15350684	+	--	--	K12126 phytochrome-interacting factor 3 | (RefSeq) PIF3; phytochrome interacting factor 3 (A)	--	RecName: Full=Transcription factor bHLH130; AltName: Full=Basic helix-loop-helix protein 130; Short=AtbHLH130; Short=bHLH 130; AltName: Full=Transcription factor EN 69; AltName: Full=bHLH transcription factor bHLH130;	--	--	GO:0005634,nucleus; GO:0001046,core promoter sequence-specific DNA binding; GO:0003700,DNA-binding transcription factor activity; GO:0046983,protein dimerization activity; GO:0001228,DNA-binding transcription activator activity, RNA polymerase II-specific; GO:0048573,photoperiodism, flowering; GO:0006355,regulation of transcription, DNA-templated; GO:0006366,transcription by RNA polymerase II	Helix-loop-helix DNA-binding domain
g1164	B3	TF	B3->B3	68	25	-1.489	down	LG1	6945659	6947275	+	--	--	--	--	RecName: Full=B3 domain-containing transcription factor VRN1; AltName: Full=Protein VERNALIZATION 1;	--	--	GO:0005654,nucleoplasm; GO:0003677,DNA binding; GO:0043565,sequence-specific DNA binding; GO:0009909,regulation of flower development; GO:0006355,regulation of transcription, DNA-templated; GO:0006351,transcription, DNA-templated; GO:0010048,vernalization response	B3 DNA binding domain
g1216	bZIP	TF	bZIP	20	0	-6.914	down	LG1	7251764	7255583	-	--	--	K09060 plant G-box-binding factor | (RefSeq) bZIP16; basic region/leucine zipper transcription factor 16 (A)	basic leucine zipper 43 [Sesamum indicum]	RecName: Full=Basic leucine zipper 43 {ECO:0000303|PubMed:11906833}; Short=AtbZIP43 {ECO:0000303|PubMed:11906833}; Short=bZIP protein 43 {ECO:0000303|PubMed:11906833};	SubName: Full=BZIP_1 domain-containing protein {ECO:0000313|EMBL:GAV60069.1};	--	GO:0005634,nucleus; GO:0003677,DNA binding; GO:0003700,DNA-binding transcription factor activity; GO:0006351,transcription, DNA-templated	bZIP Maf transcription factor
g12164	HB-HD-ZIP	TF	HB->HB-HD-ZIP	27	0	-7.355	down	LG3	20137835	20140560	-	--	--	K09338 homeobox-leucine zipper protein | (RefSeq) HB-1; homeobox 1 (A)	PREDICTED: homeobox-leucine zipper protein HAT7 isoform X1 [Ipomoea nil]	RecName: Full=Homeobox-leucine zipper protein HOX16; AltName: Full=HD-ZIP protein HOX16; AltName: Full=Homeodomain transcription factor HOX16; AltName: Full=OsHox16;	SubName: Full=Transcription factor PHOX2/ARIX, contains HOX domain {ECO:0000313|EMBL:PIN17024.1};	Transcription factor HEX, contains HOX and HALZ domains	GO:0005634,nucleus; GO:0003700,DNA-binding transcription factor activity; GO:0043565,sequence-specific DNA binding; GO:0006351,transcription, DNA-templated	Domain of unknown function (DUF4201)
g12270	bZIP	TF	bZIP	121	4	-4.902	down	LG3	20978785	20979513	-	--	--	K09060 plant G-box-binding factor | (RefSeq) bZIP68; basic region/leucine zipper transcription factor 68 (A)	PREDICTED: basic leucine zipper 8-like [Ipomoea nil]	RecName: Full=Basic leucine zipper 43 {ECO:0000303|PubMed:11906833}; Short=AtbZIP43 {ECO:0000303|PubMed:11906833}; Short=bZIP protein 43 {ECO:0000303|PubMed:11906833};	SubName: Full=basic leucine zipper 43-like {ECO:0000313|RefSeq:XP_016500977.1};	--	GO:0005634,nucleus; GO:0003677,DNA binding; GO:0003700,DNA-binding transcription factor activity; GO:0006351,transcription, DNA-templated	Basic region leucine zipper
g12272	bHLH	TF	bHLH	346	149	-1.216	down	LG3	21004378	21012899	+	--	--	K12126 phytochrome-interacting factor 3 | (RefSeq) PIF3; phytochrome interacting factor 3 (A)	PREDICTED: transcription factor bHLH76-like isoform X1 [Ipomoea nil]	RecName: Full=Transcription factor bHLH49; AltName: Full=Basic helix-loop-helix protein 49; Short=AtbHLH49; Short=bHLH 49; AltName: Full=Protein ACTIVATOR FOR CELL ELONGATION 1; AltName: Full=Transcription factor EN 82; AltName: Full=bHLH transcription factor bHLH049;	SubName: Full=Uncharacterized protein {ECO:0000313|EMBL:CCB51156.1};	--	GO:0005634,nucleus; GO:0003700,DNA-binding transcription factor activity; GO:0046983,protein dimerization activity; GO:0043565,sequence-specific DNA binding; GO:0040008,regulation of growth; GO:0006355,regulation of transcription, DNA-templated; GO:0006351,transcription, DNA-templated	Helix-loop-helix DNA-binding domain
g12377	AP2/ERF-RAV	TF	AP2/ERF->AP2/ERF-RAV	622	132	-2.24	down	LG3	21872060	21873352	+	--	--	K09287 RAV-like factor | (RefSeq) RAV2; related to ABI3/VP1 2 (A)	PREDICTED: AP2/ERF and B3 domain-containing transcription factor RAV1-like [Ipomoea nil]	RecName: Full=AP2/ERF and B3 domain-containing transcription repressor RAV2; AltName: Full=Ethylene-responsive transcription factor RAV2; AltName: Full=Protein RELATED TO ABI3/VP1 2; AltName: Full=Protein RELATED TO APETALA2 8; AltName: Full=Protein TEMPRANILLO 2;	SubName: Full=Uncharacterized protein {ECO:0000313|EMBL:PIN09498.1};	--	GO:0005634,nucleus; GO:0003700,DNA-binding transcription factor activity; GO:0043565,sequence-specific DNA binding; GO:0009873,ethylene-activated signaling pathway; GO:0045892,negative regulation of transcription, DNA-templated; GO:0006351,transcription, DNA-templated	AP2 domain
g12832	AP2/ERF-RAV	TF	AP2/ERF->AP2/ERF-RAV	2173	283	-2.943	down	LG4	402970	404648	+	--	--	K09287 RAV-like factor | (RefSeq) RAV2; related to ABI3/VP1 2 (A)	PREDICTED: AP2/ERF and B3 domain-containing transcription factor RAV1-like [Ipomoea nil]	RecName: Full=AP2/ERF and B3 domain-containing transcription repressor RAV2; AltName: Full=Ethylene-responsive transcription factor RAV2; AltName: Full=Protein RELATED TO ABI3/VP1 2; AltName: Full=Protein RELATED TO APETALA2 8; AltName: Full=Protein TEMPRANILLO 2;	SubName: Full=Tempranillo {ECO:0000313|EMBL:AGS83386.1};	--	GO:0005634,nucleus; GO:0003700,DNA-binding transcription factor activity; GO:0043565,sequence-specific DNA binding; GO:0009873,ethylene-activated signaling pathway; GO:0045892,negative regulation of transcription, DNA-templated; GO:0006351,transcription, DNA-templated	AP2 domain
g1288	AP2/ERF-ERF	TF	AP2/ERF->AP2/ERF-ERF	23	63	1.466	up	LG1	7705023	7706464	-	--	--	--	PREDICTED: uncharacterized protein LOC109188952 [Ipomoea nil]	--	SubName: Full=ethylene-responsive transcription factor RAP2-11-like {ECO:0000313|RefSeq:XP_016488545.1};	--	GO:0005634,nucleus; GO:0003677,DNA binding; GO:0003700,DNA-binding transcription factor activity; GO:0006351,transcription, DNA-templated	AP2 domain
g12897	bZIP	TF	bZIP	738	184	-2	down	LG4	826720	827649	+	--	--	K09060 plant G-box-binding factor | (RefSeq) bZIP68; basic region/leucine zipper transcription factor 68 (A)	PREDICTED: basic leucine zipper 43-like [Ipomoea nil]	RecName: Full=Basic leucine zipper 43 {ECO:0000303|PubMed:11906833}; Short=AtbZIP43 {ECO:0000303|PubMed:11906833}; Short=bZIP protein 43 {ECO:0000303|PubMed:11906833};	SubName: Full=Uncharacterized protein {ECO:0000313|EnsemblPlants:PGSC0003DMT400019465};	--	GO:0005634,nucleus; GO:0003677,DNA binding; GO:0003700,DNA-binding transcription factor activity; GO:0006351,transcription, DNA-templated	bZIP Maf transcription factor
g13071	AUX/IAA	TR	AUX/IAA	9	0	-5.709	down	LG4	2091249	2097890	-	--	--	K14484 auxin-responsive protein IAA | (RefSeq) IAA12; AUX/IAA transcriptional regulator family protein (A)	PREDICTED: auxin-responsive protein IAA13-like isoform X1 [Ipomoea nil]	RecName: Full=Auxin-responsive protein IAA12; AltName: Full=Indoleacetic acid-induced protein 12; AltName: Full=Protein BODENLOS;	RecName: Full=Auxin-responsive protein {ECO:0000256|RuleBase:RU004549};	--	GO:0005634,nucleus; GO:0003700,DNA-binding transcription factor activity; GO:0009734,auxin-activated signaling pathway; GO:0009880,embryonic pattern specification; GO:0045892,negative regulation of transcription, DNA-templated; GO:0048364,root development; GO:0006351,transcription, DNA-templated; GO:0010051,xylem and phloem pattern formation	AUX/IAA family
g1308	C2C2-Dof	TF	C2C2->C2C2-Dof	1073	432	-1.314	down	LG1	7846732	7850295	-	--	--	K16222 Dof zinc finger protein DOF5.5 | (RefSeq) CDF1; cycling DOF factor 1 (A)	CDF2 [Ipomoea nil]	RecName: Full=Cyclic dof factor 2; AltName: Full=Dof zinc finger protein DOF5.2; Short=AtDOF5.2;	SubName: Full=CDF2 {ECO:0000313|EMBL:AIZ66164.1};	--	GO:0005634,nucleus; GO:0003700,DNA-binding transcription factor activity; GO:0046872,metal ion binding; GO:0043565,sequence-specific DNA binding; GO:0009908,flower development; GO:0006355,regulation of transcription, DNA-templated; GO:0006351,transcription, DNA-templated	Dof domain, zinc finger
g13132	AP2/ERF-ERF	TF	AP2/ERF->AP2/ERF-ERF	1385	113	-3.622	down	LG4	2474885	2476112	-	--	--	K14516 ethylene-responsive transcription factor 1 | (RefSeq) ERF1; ethylene response factor 1 (A)	PREDICTED: ethylene-responsive transcription factor 1B-like [Ipomoea nil]	RecName: Full=Ethylene-responsive transcription factor 1B; Short=AtERF1B; AltName: Full=Ethylene-responsive element-binding factor 1B; Short=EREBP-1B;	SubName: Full=Ethylene-responsive transcription factor 1B {ECO:0000313|EMBL:APZ87851.1}; Flags: Fragment;	--	GO:0005634,nucleus; GO:0003677,DNA binding; GO:0003700,DNA-binding transcription factor activity; GO:0006952,defense response; GO:0009873,ethylene-activated signaling pathway; GO:0009867,jasmonic acid mediated signaling pathway; GO:0006351,transcription, DNA-templated	AP2 domain
g13218	AUX/IAA	TR	AUX/IAA	1601	718	-1.157	down	LG4	3046682	3049178	+	--	--	K14484 auxin-responsive protein IAA | (RefSeq) ATAUX2-11; AUX/IAA transcriptional regulator family protein (A)	PREDICTED: auxin-responsive protein IAA4-like [Ipomoea nil]	RecName: Full=Auxin-induced protein 22B; AltName: Full=Indole-3-acetic acid-induced protein ARG4;	RecName: Full=Auxin-responsive protein {ECO:0000256|RuleBase:RU004549};	--	GO:0005634,nucleus; GO:0009734,auxin-activated signaling pathway; GO:0006355,regulation of transcription, DNA-templated; GO:0006351,transcription, DNA-templated	AUX/IAA family
g13385	TUB	TF	TUB	1310	2713	1.049	up	LG4	4084454	4086200	+	--	--	--	--	RecName: Full=Tubby-like F-box protein 6; Short=OsTLP6; AltName: Full=Tubby-like F-box protein 14; Short=OsTLP14;	--	Tub family proteins	GO:0035091,phosphatidylinositol binding	Tub family
g13567	SBP	TF	SBP	340	121	-1.484	down	LG4	5277025	5281566	-	--	--	--	--	RecName: Full=Squamosa promoter-binding-like protein 12;	--	--	GO:0005634,nucleus; GO:0003677,DNA binding; GO:0046872,metal ion binding; GO:0006355,regulation of transcription, DNA-templated; GO:0006351,transcription, DNA-templated	SBP domain
g13719	WRKY	TF	WRKY	26	79	1.606	up	LG4	6378746	6379726	-	--	--	K13425 WRKY transcription factor 22 | (RefSeq) WRKY22; WRKY family transcription factor (A)	--	RecName: Full=Probable WRKY transcription factor 50; AltName: Full=WRKY DNA-binding protein 50;	--	--	GO:0005634,nucleus; GO:0003700,DNA-binding transcription factor activity; GO:0043565,sequence-specific DNA binding; GO:0050832,defense response to fungus; GO:0009867,jasmonic acid mediated signaling pathway; GO:0006351,transcription, DNA-templated	FLYWCH zinc finger domain
g1380	OFP	TF	OFP	56	15	-1.884	down	LG1	8335439	8340393	-	--	--	--	PREDICTED: transcription repressor OFP7 [Ipomoea nil]	RecName: Full=Transcription repressor OFP7; AltName: Full=Ovate family protein 7; Short=AtOFP7;	SubName: Full=Uncharacterized protein {ECO:0000313|EMBL:CDP02824.1};	--	GO:0005634,nucleus; GO:0005886,plasma membrane; GO:0045892,negative regulation of transcription, DNA-templated; GO:0006351,transcription, DNA-templated	Transcriptional repressor, ovate
g13827	C2H2	TF	C2H2	1355	525	-1.37	down	LG4	7346388	7348350	-	--	--	--	PREDICTED: uncharacterized protein LOC109175997 [Ipomoea nil]	--	SubName: Full=Putative nucleic acid binding protein {ECO:0000313|EMBL:OMO49834.1};	--	GO:0003676,nucleic acid binding	--
g13864	AUX/IAA	TR	AUX/IAA	223	83	-1.432	down	LG4	7640003	7641426	-	--	--	K14484 auxin-responsive protein IAA | (RefSeq) ATAUX2-11; AUX/IAA transcriptional regulator family protein (A)	PREDICTED: auxin-responsive protein IAA4-like [Ipomoea nil]	RecName: Full=Auxin-responsive protein IAA4; AltName: Full=Auxin-induced protein AUX2-11; AltName: Full=Indoleacetic acid-induced protein 4;	RecName: Full=Auxin-responsive protein {ECO:0000256|RuleBase:RU004549};	--	GO:0005634,nucleus; GO:0003677,DNA binding; GO:0003700,DNA-binding transcription factor activity; GO:0043565,sequence-specific DNA binding; GO:0044212,transcription regulatory region DNA binding; GO:0009734,auxin-activated signaling pathway; GO:0009733,response to auxin; GO:0006351,transcription, DNA-templated	AUX/IAA family
g13906	SNF2	TR	SNF2	94	24	-2.023	down	LG4	7980856	7987447	-	--	--	K15505 DNA repair protein RAD5 [EC:3.6.4.-] | (RefSeq) Helicase protein with RING/U-box domain-containing protein (A)	PREDICTED: putative SWI/SNF-related matrix-associated actin-dependent regulator of chromatin subfamily A member 3-like 3 isoform X1 [Ipomoea nil]	RecName: Full=DNA repair protein RAD5B {ECO:0000305}; EC=3.6.4.- {ECO:0000305}; AltName: Full=Putative SWI/SNF-related matrix-associated actin-dependent regulator of chromatin subfamily A member 3-like 3 {ECO:0000305}; Short=SMARCA3-like protein 3 {ECO:0000305}; AltName: Full=RAD5 homolog B {ECO:0000303|PubMed:18310306}; Short=AtRAD5B {ECO:0000303|PubMed:18310306};	SubName: Full=putative SWI/SNF-related matrix-associated actin-dependent regulator of chromatin subfamily A member 3-like 3 {ECO:0000313|RefSeq:XP_016462752.1};	Helicase-like transcription factor HLTF/DNA helicase RAD5, DEAD-box superfamily	GO:0009941,chloroplast envelope; GO:0005634,nucleus; GO:0005524,ATP binding; GO:0004386,helicase activity; GO:0003676,nucleic acid binding; GO:0008270,zinc ion binding; GO:0016569,covalent chromatin modification; GO:0006281,DNA repair	Anaphase-promoting complex subunit 11 RING-H2 finger
g13922	AP2/ERF-ERF	TF	AP2/ERF->AP2/ERF-ERF	384	52	-2.889	down	LG4	8095279	8096094	+	--	--	K14516 ethylene-responsive transcription factor 1 | (RefSeq) ERF1; ethylene response factor 1 (A)	PREDICTED: ethylene-responsive transcription factor 1B-like [Ipomoea nil]	RecName: Full=Ethylene-responsive transcription factor 1B; Short=AtERF1B; AltName: Full=Ethylene-responsive element-binding factor 1B; Short=EREBP-1B;	SubName: Full=Uncharacterized protein {ECO:0000313|EMBL:KJB28453.1};	--	GO:0005634,nucleus; GO:0003677,DNA binding; GO:0003700,DNA-binding transcription factor activity; GO:0006952,defense response; GO:0009873,ethylene-activated signaling pathway; GO:0009867,jasmonic acid mediated signaling pathway; GO:0006351,transcription, DNA-templated	AP2 domain
g14521	Others	TR	Others	1155	2653	1.201	up	LG4	12852786	12855978	+	--	--	K12135 zinc finger protein CONSTANS | (RefSeq) CO; B-box type zinc finger protein with CCT domain-containing protein (A)	PREDICTED: protein CHLOROPLAST IMPORT APPARATUS 2-like [Ipomoea nil]	RecName: Full=Protein CHLOROPLAST IMPORT APPARATUS 2; Flags: Precursor;	SubName: Full=Uncharacterized protein {ECO:0000313|EMBL:GAY37246.1};	GATA-4/5/6 transcription factors	GO:0009507,chloroplast; GO:0005634,nucleus; GO:0045036,protein targeting to chloroplast; GO:0006355,regulation of transcription, DNA-templated	--
g14524	bHLH	TF	bHLH	695	216	-1.692	down	LG4	12898706	12903856	+	--	--	K13422 transcription factor MYC2 | (RefSeq) MYC2; Basic helix-loop-helix (bHLH) DNA-binding family protein (A)	PREDICTED: transcription factor bHLH35-like [Ipomoea nil]	RecName: Full=Transcription factor bHLH35; AltName: Full=Basic helix-loop-helix protein 35; Short=AtbHLH35; Short=bHLH 35; AltName: Full=Transcription factor EN 41; AltName: Full=bHLH transcription factor bHLH035;	SubName: Full=transcription factor bHLH35-like isoform X2 {ECO:0000313|RefSeq:XP_016449593.1};	--	GO:0005634,nucleus; GO:0003677,DNA binding; GO:0046983,protein dimerization activity; GO:0006355,regulation of transcription, DNA-templated; GO:0006351,transcription, DNA-templated	Helix-loop-helix DNA-binding domain
g14945	HB-other	TF	HB->HB-other	182	59	-1.615	down	LG4	16330070	16331754	+	--	--	K09338 homeobox-leucine zipper protein | (RefSeq) HB-2; homeobox protein 2 (A)	PREDICTED: homeobox-leucine zipper protein HAT4 [Ipomoea nil]	RecName: Full=Homeobox-leucine zipper protein HAT4; AltName: Full=HD-ZIP protein ATHB-2; AltName: Full=Homeodomain transcription factor ATHB-2; AltName: Full=Homeodomain-leucine zipper protein HAT4; Short=HD-ZIP protein 4;	SubName: Full=homeobox-leucine zipper protein HAT4-like {ECO:0000313|RefSeq:XP_016473222.1};	Transcription factor HEX, contains HOX and HALZ domains	GO:0005634,nucleus; GO:0003700,DNA-binding transcription factor activity; GO:0042803,protein homodimerization activity; GO:0043565,sequence-specific DNA binding; GO:0008283,cell proliferation; GO:0045892,negative regulation of transcription, DNA-templated; GO:0010017,red or far-red light signaling pathway; GO:0009585,red, far-red light phototransduction; GO:0009733,response to auxin; GO:0009735,r…	Homeodomain
g15196	HB-other	TF	HB->HB-other	37	12	-1.679	down	LG4	18022649	18024339	-	--	--	K09338 homeobox-leucine zipper protein | (RefSeq) HB-2; homeobox protein 2 (A)	--	RecName: Full=Homeobox-leucine zipper protein HAT4; AltName: Full=HD-ZIP protein ATHB-2; AltName: Full=Homeodomain transcription factor ATHB-2; AltName: Full=Homeodomain-leucine zipper protein HAT4; Short=HD-ZIP protein 4;	SubName: Full=homeobox-leucine zipper protein HAT4-like {ECO:0000313|RefSeq:XP_016473222.1};	Transcription factor HEX, contains HOX and HALZ domains	GO:0005634,nucleus; GO:0003700,DNA-binding transcription factor activity; GO:0042803,protein homodimerization activity; GO:0043565,sequence-specific DNA binding; GO:0008283,cell proliferation; GO:0045892,negative regulation of transcription, DNA-templated; GO:0010017,red or far-red light signaling pathway; GO:0009585,red, far-red light phototransduction; GO:0009733,response to auxin; GO:0009735,r…	Homeodomain
g15890	GRAS	TF	GRAS	162	29	-2.527	down	LG4	23528324	23531532	-	--	--	K14494 DELLA protein | (RefSeq) RGL1; RGA-like 1 (A)	PREDICTED: scarecrow-like protein 28 [Ipomoea nil]	RecName: Full=Scarecrow-like protein 28; Short=AtSCL28; AltName: Full=GRAS family protein 8; Short=AtGRAS-8;	SubName: Full=Uncharacterized protein {ECO:0000313|EnsemblPlants:Solyc08g080400.1.1};	--	GO:0005634,nucleus; GO:0003700,DNA-binding transcription factor activity; GO:0043565,sequence-specific DNA binding; GO:1900459,positive regulation of brassinosteroid mediated signaling pathway; GO:0006355,regulation of transcription, DNA-templated; GO:0006351,transcription, DNA-templated	GRAS domain family
g16110	HSF	TF	HSF	50	191	1.936	up	LG4	25431614	25433112	+	--	--	K09419 heat shock transcription factor, other eukaryote | (RefSeq) HSFC1; heat shock transcription factor C1 (A)	PREDICTED: heat stress transcription factor C-1-like [Ipomoea nil]	RecName: Full=Heat stress transcription factor C-1; Short=AtHsfC1; AltName: Full=AtHsf-08;	SubName: Full=heat stress transcription factor C-1 {ECO:0000313|RefSeq:XP_009770587.1};	Heat shock transcription factor	GO:0005634,nucleus; GO:0003700,DNA-binding transcription factor activity; GO:0043565,sequence-specific DNA binding; GO:0006351,transcription, DNA-templated	HSF-type DNA-binding
g16698	NAC	TF	NAC	410	106	-1.953	down	LG5	664823	668946	+	--	--	--	PREDICTED: NAC domain-containing protein 18-like [Ipomoea nil]	RecName: Full=NAC transcription factor NAM-B1; Short=TtNAM-B1;	SubName: Full=NAC domain transcriptional regulator superfamily protein, putative {ECO:0000313|EMBL:EOY32709.1};	--	GO:0005634,nucleus; GO:0003677,DNA binding; GO:0006355,regulation of transcription, DNA-templated; GO:0006351,transcription, DNA-templated	Nop14-like family
g16771	C2H2	TF	C2H2	136	58	-1.226	down	LG5	1059684	1060961	+	--	--	--	PREDICTED: protein SENSITIVE TO PROTON RHIZOTOXICITY 1-like [Ipomoea nil]	RecName: Full=Zinc finger protein STOP1 homolog; AltName: Full=Protein STOP1 homolog;	SubName: Full=Protein sensitive to proton rhizotoxicity 1 {ECO:0000313|EMBL:OIT26869.1};	FOG: Zn-finger	GO:0005634,nucleus; GO:0003700,DNA-binding transcription factor activity; GO:0046872,metal ion binding; GO:0003676,nucleic acid binding; GO:0010447,response to acidic pH; GO:0010044,response to aluminum ion; GO:0006351,transcription, DNA-templated	Zinc-finger of C2H2 type
g16793	bHLH	TF	bHLH	86	17	-2.31	down	LG5	1197827	1200019	-	--	--	K13422 transcription factor MYC2 | (RefSeq) MYC2; Basic helix-loop-helix (bHLH) DNA-binding family protein (A)	PREDICTED: transcription factor bHLH30-like [Ipomoea nil]	RecName: Full=Transcription factor bHLH30; AltName: Full=Basic helix-loop-helix protein 30; Short=AtbHLH30; Short=bHLH 30; AltName: Full=Transcription factor EN 53; AltName: Full=bHLH transcription factor bHLH030;	SubName: Full=transcription factor bHLH30-like {ECO:0000313|RefSeq:XP_016469430.1};	--	GO:0005634,nucleus; GO:0003677,DNA binding; GO:0003700,DNA-binding transcription factor activity; GO:0046983,protein dimerization activity; GO:0006355,regulation of transcription, DNA-templated; GO:0006351,transcription, DNA-templated	Helix-loop-helix DNA-binding domain
g16823	SET	TR	SET	39	10	-1.943	down	LG5	1338372	1340336	-	--	--	K11426 SET and MYND domain-containing protein | (RefSeq) SDG37; SET domain group 37 (A)	PREDICTED: uncharacterized protein LOC109177701 [Ipomoea nil]	RecName: Full=Histone-lysine N-methyltransferase ATXR2; EC=2.1.1.43; AltName: Full=Protein SET DOMAIN GROUP 36; AltName: Full=Trithorax-related protein 2; Short=TRX-related protein 2;	SubName: Full=uncharacterized protein LOC104212092 {ECO:0000313|RefSeq:XP_009759577.1};	Predicted histone tail methylase containing SET domain	GO:0005634,nucleus; GO:0018024,histone-lysine N-methyltransferase activity; GO:0046872,metal ion binding	Tetratricopeptide repeat
g16868	MYB-related	TF	MYB->MYB-related	2205	816	-1.433	down	LG5	1609045	1613204	-	--	--	K12133 MYB-related transcription factor LHY | (RefSeq) LHY; Homeodomain-like superfamily protein (A)	PREDICTED: protein REVEILLE 2-like [Ipomoea nil]	RecName: Full=Protein REVEILLE 1;	SubName: Full=Myb family transcription factor {ECO:0000313|EMBL:BAO57283.1};	Zuotin and related molecular chaperones (DnaJ superfamily), contains DNA-binding domains	GO:0005634,nucleus; GO:0003677,DNA binding; GO:0003700,DNA-binding transcription factor activity; GO:0009851,auxin biosynthetic process; GO:0009734,auxin-activated signaling pathway; GO:0007623,circadian rhythm; GO:0010600,regulation of auxin biosynthetic process; GO:0006355,regulation of transcription, DNA-templated; GO:0006351,transcription, DNA-templated	Myb DNA-binding like
g16992	C2C2-GATA	TF	C2C2->C2C2-GATA	143	45	-1.655	down	LG5	2333371	2337428	-	--	--	--	PREDICTED: GATA transcription factor 5-like [Ipomoea nil]	RecName: Full=GATA transcription factor 5;	--	GATA-4/5/6 transcription factors	GO:0005634,nucleus; GO:0005667,transcription factor complex; GO:0003682,chromatin binding; GO:0003700,DNA-binding transcription factor activity; GO:0000977,RNA polymerase II regulatory region sequence-specific DNA binding; GO:0001085,RNA polymerase II transcription factor binding; GO:0001228,DNA-binding transcription activator activity, RNA polymerase II-specific; GO:0008270,zinc ion binding; GO:…	GATA zinc finger
g17032	zf-HD	TF	zf-HD	22	133	2.557	up	LG5	2585556	2587157	-	--	--	--	PREDICTED: zinc-finger homeodomain protein 2 [Ipomoea nil]	RecName: Full=Zinc-finger homeodomain protein 5; Short=AtZHD5; AltName: Full=Homeobox protein 33; Short=AtHB-33;	--	--	GO:0005634,nucleus; GO:0003700,DNA-binding transcription factor activity; GO:0046872,metal ion binding; GO:0042803,protein homodimerization activity; GO:0043565,sequence-specific DNA binding; GO:0009738,abscisic acid-activated signaling pathway; GO:0045893,positive regulation of transcription, DNA-templated; GO:0009737,response to abscisic acid; GO:0006351,transcription, DNA-templated	ZF-HD protein dimerisation region
g17048	GRAS	TF	GRAS	205	92	-1.161	down	LG5	2684364	2687482	-	--	--	K14494 DELLA protein | (RefSeq) RGL2; RGA-like 2 (A)	PREDICTED: scarecrow-like protein 4 [Ipomoea nil]	RecName: Full=SCARECROW-LIKE protein 7 {ECO:0000303|PubMed:20616154}; AltName: Full=PeSCL7 {ECO:0000303|PubMed:20616154};	--	--	GO:0005634,nucleus; GO:0003677,DNA binding; GO:0006355,regulation of transcription, DNA-templated; GO:0006351,transcription, DNA-templated	GRAS domain family
g17062	HB-other	TF	HB->HB-other	652	143	-2.186	down	LG5	2768037	2770022	-	--	--	K09338 homeobox-leucine zipper protein | (RefSeq) HB40; homeobox protein 40 (A)	--	RecName: Full=Homeobox-leucine zipper protein ATHB-40; AltName: Full=HD-ZIP protein ATHB-40; AltName: Full=Homeodomain transcription factor ATHB-40;	--	Transcription factor HEX, contains HOX and HALZ domains	GO:0005634,nucleus; GO:0003700,DNA-binding transcription factor activity; GO:0043565,sequence-specific DNA binding; GO:0009733,response to auxin; GO:0006351,transcription, DNA-templated	Homeobox associated leucine zipper
g17166	AP2/ERF-AP2	TF	AP2/ERF->AP2/ERF-AP2	266	89	-1.585	down	LG5	3525629	3530948	-	--	--	K09285 AP2-like factor, ANT lineage | (RefSeq) ANT; Integrase-type DNA-binding superfamily protein (A)	--	RecName: Full=AP2-like ethylene-responsive transcription factor ANT; AltName: Full=Complementing a protein kinase C mutant protein 1; AltName: Full=Protein AINTEGUMENTA; AltName: Full=Protein DRAGON; AltName: Full=Protein OVULE MUTANT;	--	--	GO:0005634,nucleus; GO:0003677,DNA binding; GO:0003700,DNA-binding transcription factor activity; GO:0043565,sequence-specific DNA binding; GO:0030154,cell differentiation; GO:0009908,flower development; GO:0019760,glucosinolate metabolic process; GO:0010492,maintenance of shoot apical meristem identity; GO:0042127,regulation of cell proliferation; GO:0006351,transcription, DNA-templated	AP2 domain
g17423	NAC	TF	NAC	19	160	3.066	up	LG5	5299025	5301373	-	--	--	--	--	RecName: Full=Protein FEZ; AltName: Full=NAC domain-containing protein 9; Short=ANAC009;	--	--	GO:0005634,nucleus; GO:0003677,DNA binding; GO:0003700,DNA-binding transcription factor activity; GO:0045770,positive regulation of asymmetric cell division; GO:0009733,response to auxin; GO:0048829,root cap development; GO:0048103,somatic stem cell division; GO:0006351,transcription, DNA-templated	RPEL repeat
g17478	LOB	TF	LOB	215	66	-1.704	down	LG5	5662166	5664439	-	--	--	K21994 LOB domain-containing protein 18 | (RefSeq) LBD18; LOB domain-containing protein 18 (A)	--	RecName: Full=LOB domain-containing protein 25; AltName: Full=ASYMMETRIC LEAVES 2-like protein 3; Short=AS2-like protein 3;	--	--	--	Lateral organ boundaries (LOB) domain
g17698	bZIP	TF	bZIP	39	7	-2.48	down	LG5	7395447	7396244	+	--	--	K14432 ABA responsive element binding factor | (RefSeq) ABF2; abscisic acid responsive elements-binding factor 2 (A)	PREDICTED: basic leucine zipper 43-like [Ipomoea nil]	RecName: Full=Basic leucine zipper 43 {ECO:0000303|PubMed:11906833}; Short=AtbZIP43 {ECO:0000303|PubMed:11906833}; Short=bZIP protein 43 {ECO:0000303|PubMed:11906833};	SubName: Full=Basic leucine zipper 43 {ECO:0000313|EMBL:PHT57017.1};	--	GO:0005634,nucleus; GO:0003677,DNA binding; GO:0003700,DNA-binding transcription factor activity; GO:0006351,transcription, DNA-templated	Initiation control protein YabA
g17703	C2C2-CO-like	TF	C2C2->C2C2-CO-like	66	181	1.465	up	LG5	7431960	7435219	-	--	--	K12135 zinc finger protein CONSTANS | (RefSeq) CO; B-box type zinc finger protein with CCT domain-containing protein (A)	PREDICTED: zinc finger protein CONSTANS-LIKE 2-like [Ipomoea nil]	RecName: Full=Zinc finger protein CONSTANS-LIKE 2;	SubName: Full=CONSTANS protein {ECO:0000313|EMBL:CAP09655.1};	GATA-4/5/6 transcription factors	GO:0005634,nucleus; GO:0003677,DNA binding; GO:0003700,DNA-binding transcription factor activity; GO:0008270,zinc ion binding; GO:0009658,chloroplast organization; GO:0009909,regulation of flower development; GO:0009416,response to light stimulus; GO:0006351,transcription, DNA-templated	B-box zinc finger
g17983	MYB	TF	MYB->MYB	95	44	-1.106	down	LG5	9538579	9542698	-	--	--	K09422 transcription factor MYB, plant | (RefSeq) MYB1; myb domain protein 1 (A)	PREDICTED: myb-like protein AA [Ipomoea nil]	RecName: Full=Transcription factor MYB1 {ECO:0000303|PubMed:11597504}; AltName: Full=Myb-related protein 1 {ECO:0000303|PubMed:11597504}; Short=AtMYB1 {ECO:0000303|PubMed:11597504};	SubName: Full=Transcription factor myb44 {ECO:0000313|EMBL:OIT19741.1};	Transcription factor, Myb superfamily	GO:0005634,nucleus; GO:0003700,DNA-binding transcription factor activity; GO:0000981,DNA-binding transcription factor activity, RNA polymerase II-specific; GO:0043565,sequence-specific DNA binding; GO:0001135,RNA polymerase II transcription regulator recruiting activity; GO:0044212,transcription regulatory region DNA binding; GO:0030154,cell differentiation; GO:0006357,regulation of transcription…	SLIDE
g18028	bHLH	TF	bHLH	94	10	-3.222	down	LG5	9807630	9808487	+	--	--	K12126 phytochrome-interacting factor 3 | (RefSeq) PIF3; phytochrome interacting factor 3 (A)	unnamed protein product [Coffea canephora]	RecName: Full=Transcription factor LAX PANICLE 1 {ECO:0000305}; AltName: Full=Basic helix-loop-helix protein 123 {ECO:0000303|PubMed:16896230}; Short=OsbHLH123 {ECO:0000303|PubMed:16896230}; AltName: Full=Protein LAX PANICLE {ECO:0000303|PubMed:13130077};	SubName: Full=Uncharacterized protein {ECO:0000313|EMBL:CDP06453.1};	--	GO:0005634,nucleus; GO:0003677,DNA binding; GO:0046983,protein dimerization activity; GO:0007275,multicellular organism development; GO:0045893,positive regulation of transcription, DNA-templated; GO:2000032,regulation of secondary shoot formation; GO:0006351,transcription, DNA-templated	Helix-loop-helix DNA-binding domain
g18302	WRKY	TF	WRKY	20	1	-4.12	down	LG5	11985355	11986956	-	--	--	K16225 probable WRKY transcription factor 52 | (RefSeq) RRS1; Disease resistance protein (TIR-NBS-LRR class) (A)	PREDICTED: probable WRKY transcription factor 70 [Ipomoea nil]	RecName: Full=Probable WRKY transcription factor 70; AltName: Full=WRKY DNA-binding protein 70;	SubName: Full=WRKY DNA-binding protein 70, putative isoform 1 {ECO:0000313|EMBL:EOY04438.1};	--	GO:0005634,nucleus; GO:0003700,DNA-binding transcription factor activity; GO:0043565,sequence-specific DNA binding; GO:0042742,defense response to bacterium; GO:0050832,defense response to fungus; GO:0009864,induced systemic resistance, jasmonic acid mediated signaling pathway; GO:1900056,negative regulation of leaf senescence; GO:0045892,negative regulation of transcription, DNA-templated; GO:00…	WRKY DNA -binding domain
g18834	OFP	TF	OFP	45	12	-1.944	down	LG5	15910131	15911021	-	--	--	--	PREDICTED: transcription repressor OFP1-like isoform X3 [Ipomoea nil]	RecName: Full=Transcription repressor OFP1; AltName: Full=Ovate family protein 1; Short=AtOFP1;	SubName: Full=Uncharacterized protein {ECO:0000313|EMBL:KYP63805.1};	--	GO:0005856,cytoskeleton; GO:0005730,nucleolus; GO:0003677,DNA binding; GO:0006281,DNA repair; GO:0045892,negative regulation of transcription, DNA-templated; GO:0051510,regulation of unidimensional cell growth; GO:0006351,transcription, DNA-templated	DNA-binding domain
g19012	Others	TR	Others	1218	399	-1.606	down	LG5	17207290	17210196	+	--	--	K12135 zinc finger protein CONSTANS | (RefSeq) CO; B-box type zinc finger protein with CCT domain-containing protein (A)	PREDICTED: B-box zinc finger protein 19-like isoform X1 [Ipomoea nil]	RecName: Full=B-box zinc finger protein 19 {ECO:0000303|PubMed:19920209}; AltName: Full=Protein DOUBLE B-BOX 1B; AltName: Full=Protein SALT TOLERANCE HOMOLOG 5;	SubName: Full=B-box zinc finger protein 19 {ECO:0000313|EMBL:OIT07075.1};	--	GO:0005634,nucleus; GO:0000989,NA; GO:0008270,zinc ion binding; GO:0010100,negative regulation of photomorphogenesis; GO:0006355,regulation of transcription, DNA-templated; GO:0006351,transcription, DNA-templated	B-box zinc finger
g19306	bHLH	TF	bHLH	11	0	-6.019	down	LG5	19761936	19765831	+	--	--	K13422 transcription factor MYC2 | (RefSeq) MYC2; Basic helix-loop-helix (bHLH) DNA-binding family protein (A)	--	RecName: Full=Transcription factor bHLH28; AltName: Full=Basic helix-loop-helix protein 28; Short=AtbHLH28; Short=bHLH 28; AltName: Full=Transcription factor EN 40; AltName: Full=bHLH transcription factor bHLH028;	--	--	GO:0005634,nucleus; GO:0005509,calcium ion binding; GO:0003677,DNA binding; GO:0003700,DNA-binding transcription factor activity; GO:0046983,protein dimerization activity; GO:0042538,hyperosmotic salinity response; GO:0006355,regulation of transcription, DNA-templated; GO:0009651,response to salt stress; GO:0006351,transcription, DNA-templated	Helix-loop-helix DNA-binding domain
g19324	C2C2-Dof	TF	C2C2->C2C2-Dof	34	12	-1.494	down	LG5	19912368	19914419	+	--	--	K16222 Dof zinc finger protein DOF5.5 | (RefSeq) CDF1; cycling DOF factor 1 (A)	--	RecName: Full=Dof zinc finger protein DOF4.6; Short=AtDOF4.6;	--	--	GO:0005634,nucleus; GO:0003677,DNA binding; GO:0003700,DNA-binding transcription factor activity; GO:0046872,metal ion binding; GO:0006355,regulation of transcription, DNA-templated; GO:0006351,transcription, DNA-templated	snRNA-activating protein of 50kDa MW C terminal
g19564	AP2/ERF-ERF	TF	AP2/ERF->AP2/ERF-ERF	65	8	-3.018	down	LG5	21733516	21734814	+	--	--	K09286 EREBP-like factor | (RefSeq) RAP2.4; related to AP2 4 (A)	--	RecName: Full=Ethylene-responsive transcription factor ERF061;	--	--	GO:0005634,nucleus; GO:0003677,DNA binding; GO:0003700,DNA-binding transcription factor activity; GO:0009873,ethylene-activated signaling pathway; GO:0010200,response to chitin; GO:0006351,transcription, DNA-templated	AP2 domain
g19578	HMG	TR	HMG	220	30	-2.883	down	LG5	21855358	21857923	-	--	--	K09273 upstream-binding transcription factor | (RefSeq) 3xHMG-box2; HMG (high mobility group) box protein (A)	--	RecName: Full=High mobility group B protein 6; AltName: Full=Nucleosome/chromatin assembly factor group D 06; Short=Nucleosome/chromatin assembly factor group D 6; AltName: Full=WRKY transcription factor 53; Short=AtWRKY53; Short=WRKY DNA-binding protein 53;	--	HMG box-containing protein	GO:0005634,nucleus; GO:0003677,DNA binding; GO:0003700,DNA-binding transcription factor activity	CHDNT (NUC034) domain
g20352	HB-WOX	TF	HB->HB-WOX	0	13	5.976	up	LG5	27360985	27362054	-	--	--	--	PREDICTED: WUSCHEL-related homeobox 5-like isoform X1 [Ipomoea nil]	RecName: Full=WUSCHEL-related homeobox 5;	SubName: Full=WUSCHEL-related homeobox 5-like {ECO:0000313|RefSeq:XP_009783476.1};	--	GO:0005634,nucleus; GO:0003700,DNA-binding transcription factor activity; GO:0043565,sequence-specific DNA binding; GO:0010078,maintenance of root meristem identity; GO:1902459,positive regulation of stem cell population maintenance; GO:0009733,response to auxin; GO:0006351,transcription, DNA-templated	ATPase expression protein 1
g20409	AP2/ERF-ERF	TF	AP2/ERF->AP2/ERF-ERF	367	879	1.262	up	LG5	27868517	27871904	-	--	--	K09286 EREBP-like factor | (RefSeq) DREB2A; DRE-binding protein 2A (A)	PREDICTED: dehydration-responsive element-binding protein 2C-like [Ipomoea nil]	RecName: Full=Dehydration-responsive element-binding protein 2C; Short=Protein DREB2C;	SubName: Full=dehydration-responsive element-binding protein 2C-like {ECO:0000313|RefSeq:XP_016460453.1};	--	GO:0005634,nucleus; GO:0003700,DNA-binding transcription factor activity; GO:0043565,sequence-specific DNA binding; GO:0044212,transcription regulatory region DNA binding; GO:0009738,abscisic acid-activated signaling pathway; GO:0010286,heat acclimation; GO:0045893,positive regulation of transcription, DNA-templated; GO:0009737,response to abscisic acid; GO:0006351,transcription, DNA-templated	AP2 domain
g20793	Trihelix	TF	Trihelix	1186	2752	1.215	up	LG5	30129899	30132671	-	--	--	--	PREDICTED: trihelix transcription factor GT-2-like [Ipomoea nil]	RecName: Full=Trihelix transcription factor GT-2; AltName: Full=Trihelix DNA-binding protein GT-2;	SubName: Full=Trihelix transcription factor GTL1 {ECO:0000313|EMBL:PHT31857.1};	Transcription factor GT-2 and related proteins, contains trihelix DNA-binding/SANT domain	GO:0005634,nucleus; GO:0003677,DNA binding; GO:0003700,DNA-binding transcription factor activity; GO:0006351,transcription, DNA-templated	Myb-like DNA-binding domain
g20826	NAC	TF	NAC	326	39	-3.076	down	LG5	30291345	30293863	-	--	--	--	NAC1 [Ipomoea batatas]	RecName: Full=NAC domain-containing protein 2; Short=ANAC002;	SubName: Full=NAC1 {ECO:0000313|EMBL:ACT55332.1};	--	GO:0005634,nucleus; GO:0003677,DNA binding; GO:0003700,DNA-binding transcription factor activity; GO:0009788,negative regulation of abscisic acid-activated signaling pathway; GO:0009611,response to wounding; GO:0006351,transcription, DNA-templated	No apical meristem (NAM) protein
g21443	AUX/IAA	TR	AUX/IAA	262	73	-1.839	down	LG6	4380351	4382045	+	--	--	K14484 auxin-responsive protein IAA | (RefSeq) PAP1; phytochrome-associated protein 1 (A)	PREDICTED: auxin-responsive protein IAA26-like isoform X2 [Ipomoea nil]	RecName: Full=Auxin-responsive protein IAA26; AltName: Full=Indoleacetic acid-induced protein 26; AltName: Full=Phytochrome-associated protein 1;	RecName: Full=Auxin-responsive protein {ECO:0000256|RuleBase:RU004549};	--	GO:0005634,nucleus; GO:0003700,DNA-binding transcription factor activity; GO:0009734,auxin-activated signaling pathway; GO:0009733,response to auxin; GO:0006351,transcription, DNA-templated	AUX/IAA family
g21513	C2H2	TF	C2H2	70	192	1.445	up	LG6	5039144	5043971	+	--	--	--	PREDICTED: protein indeterminate-domain 11-like [Ipomoea nil]	RecName: Full=Protein indeterminate-domain 9 {ECO:0000303|PubMed:16784536}; AltName: Full=ID1-like zinc finger protein 1 {ECO:0000303|Ref.1};	SubName: Full=Uncharacterized protein {ECO:0000313|EnsemblPlants:GSMUA_Achr5P06450_001};	FOG: Zn-finger	GO:0005634,nucleus; GO:0003677,DNA binding; GO:0003700,DNA-binding transcription factor activity; GO:0046872,metal ion binding; GO:0006355,regulation of transcription, DNA-templated; GO:0006351,transcription, DNA-templated	Zinc-finger of C2H2 type
g2168	AP2/ERF-ERF	TF	AP2/ERF->AP2/ERF-ERF	40	1	-5.069	down	LG1	14762518	14763419	-	--	--	K14517 ethylene-responsive transcription factor 2 | (RefSeq) ERF2; ethylene responsive element binding factor 2 (A)	PREDICTED: ethylene-responsive transcription factor 2-like [Ipomoea nil]	RecName: Full=Ethylene-responsive transcription factor 2; Short=AtERF2; AltName: Full=Ethylene-responsive element-binding factor 2; Short=EREBP-2;	SubName: Full=Uncharacterized protein {ECO:0000313|EnsemblPlants:PGSC0003DMT400005836};	--	GO:0005634,nucleus; GO:0003677,DNA binding; GO:0003700,DNA-binding transcription factor activity; GO:0051301,cell division; GO:0009873,ethylene-activated signaling pathway; GO:0009864,induced systemic resistance, jasmonic acid mediated signaling pathway; GO:0010087,phloem or xylem histogenesis; GO:0045893,positive regulation of transcription, DNA-templated; GO:0010200,response to chitin; GO:00063…	AP2 domain
g23492	C2H2	TF	C2H2	173	30	-2.513	down	LG6	19409556	19411697	-	--	--	--	--	RecName: Full=Protein indeterminate-domain 2 {ECO:0000303|PubMed:16784536};	--	FOG: Zn-finger	GO:0003677,DNA binding; GO:0003700,DNA-binding transcription factor activity; GO:0046872,metal ion binding; GO:0006355,regulation of transcription, DNA-templated; GO:0006351,transcription, DNA-templated	Zinc-finger double domain
g24051	PLATZ	TF	PLATZ	112	369	1.722	up	LG6	23781522	23784170	+	--	--	--	PREDICTED: uncharacterized protein LOC109180910 isoform X2 [Ipomoea nil]	--	SubName: Full=Uncharacterized protein {ECO:0000313|EMBL:KDP36720.1};	--	--	B-box zinc finger
g24498	GRAS	TF	GRAS	1	28	5.249	up	LG6	26809689	26811188	+	--	--	K14494 DELLA protein | (RefSeq) RGL2; RGA-like 2 (A)	PREDICTED: nodulation-signaling pathway 2 protein-like [Ipomoea nil]	RecName: Full=Nodulation-signaling pathway 2 protein;	SubName: Full=nodulation-signaling pathway 2 protein-like {ECO:0000313|RefSeq:XP_016479753.1};	--	GO:0005783,endoplasmic reticulum; GO:0031965,nuclear membrane; GO:0009877,nodulation; GO:0006355,regulation of transcription, DNA-templated; GO:0006351,transcription, DNA-templated	PBP/GOBP family
g24541	WRKY	TF	WRKY	87	23	-1.902	down	LG6	27075739	27078886	-	--	--	K13424 WRKY transcription factor 33 | (RefSeq) WRKY33; WRKY DNA-binding protein 33 (A)	PREDICTED: probable WRKY transcription factor 26 [Ipomoea nil]	RecName: Full=Probable WRKY transcription factor 33; AltName: Full=WRKY DNA-binding protein 33;	SubName: Full=probable WRKY transcription factor 26 isoform X1 {ECO:0000313|RefSeq:XP_016482650.1};	--	GO:0005634,nucleus; GO:0003700,DNA-binding transcription factor activity; GO:0043565,sequence-specific DNA binding; GO:0044212,transcription regulatory region DNA binding; GO:0010120,camalexin biosynthetic process; GO:0070370,cellular heat acclimation; GO:0034605,cellular response to heat; GO:0042742,defense response to bacterium; GO:0050832,defense response to fungus; GO:0010508,positive regulat…	WRKY DNA -binding domain
g24573	OFP	TF	OFP	426	140	-1.605	down	LG6	27338730	27339988	+	--	--	--	PREDICTED: transcription repressor OFP1-like isoform X1 [Ipomoea nil]	RecName: Full=Transcription repressor OFP4; AltName: Full=Ovate family protein 4; Short=AtOFP4;	SubName: Full=Uncharacterized protein {ECO:0000313|EMBL:CCB44779.1};	--	GO:0005634,nucleus; GO:0003677,DNA binding; GO:0045892,negative regulation of transcription, DNA-templated; GO:2000652,regulation of secondary cell wall biogenesis; GO:0006351,transcription, DNA-templated	DNA-binding domain
g2468	bHLH	TF	bHLH	52	5	-3.266	down	LG1	17184114	17189924	+	--	--	K20558 transcription factor SPEECHLESS | (RefSeq) SPCH; basic helix-loop-helix (bHLH) DNA-binding superfamily protein (A)	PREDICTED: transcription factor bHLH96-like [Ipomoea nil]	RecName: Full=Transcription factor bHLH96; AltName: Full=Basic helix-loop-helix protein 96; Short=AtbHLH96; Short=bHLH 96; AltName: Full=Transcription factor EN 15; AltName: Full=bHLH transcription factor bHLH096;	SubName: Full=transcription factor bHLH94-like {ECO:0000313|RefSeq:XP_016471744.1};	--	GO:0005634,nucleus; GO:0003677,DNA binding; GO:0003700,DNA-binding transcription factor activity; GO:0046983,protein dimerization activity; GO:0006351,transcription, DNA-templated	Helix-loop-helix DNA-binding domain
g2470	bHLH	TF	bHLH	83	4	-4.194	down	LG1	17202094	17205825	+	--	--	K20558 transcription factor SPEECHLESS | (RefSeq) SPCH; basic helix-loop-helix (bHLH) DNA-binding superfamily protein (A)	PREDICTED: transcription factor bHLH96-like [Ipomoea nil]	RecName: Full=Transcription factor bHLH96; AltName: Full=Basic helix-loop-helix protein 96; Short=AtbHLH96; Short=bHLH 96; AltName: Full=Transcription factor EN 15; AltName: Full=bHLH transcription factor bHLH096;	SubName: Full=transcription factor bHLH94-like {ECO:0000313|RefSeq:XP_016471744.1};	--	GO:0005634,nucleus; GO:0003677,DNA binding; GO:0003700,DNA-binding transcription factor activity; GO:0046983,protein dimerization activity; GO:0006351,transcription, DNA-templated	Mitochondrial fission regulator
g24748	bHLH	TF	bHLH	193	22	-3.111	down	LG6	28494874	28496564	-	--	--	--	PREDICTED: transcription factor ORG3-like [Ipomoea nil]	RecName: Full=Transcription factor ORG3; AltName: Full=Basic helix-loop-helix protein 39; Short=AtbHLH39; Short=bHLH 39; AltName: Full=OBP3-responsive gene 3; AltName: Full=Transcription factor EN 9; AltName: Full=bHLH transcription factor bHLH039;	SubName: Full=transcription factor ORG2-like {ECO:0000313|RefSeq:XP_016475053.1};	--	GO:0090575,RNA polymerase II transcription factor complex; GO:0003700,DNA-binding transcription factor activity; GO:0046983,protein dimerization activity; GO:0000977,RNA polymerase II regulatory region sequence-specific DNA binding; GO:0010106,cellular response to iron ion starvation; GO:0055072,iron ion homeostasis; GO:0006357,regulation of transcription by RNA polymerase II; GO:0006355,regulati…	Coiled-coil domain containing 32
g24753	Others	TR	Others	132	32	-2.067	down	LG6	28547401	28552592	+	--	--	K14492 two-component response regulator ARR-A family | (RefSeq) ARR9; response regulator 9 (A)	PREDICTED: two-component response regulator ARR9-like [Ipomoea nil]	RecName: Full=Two-component response regulator ARR9; AltName: Full=Response reactor 4;	SubName: Full=Type-A response regulator {ECO:0000313|EMBL:BAL43557.1};	GATA-4/5/6 transcription factors	GO:0005634,nucleus; GO:0000156,phosphorelay response regulator activity; GO:0007623,circadian rhythm; GO:0009736,cytokinin-activated signaling pathway; GO:0000160,phosphorelay signal transduction system; GO:0006355,regulation of transcription, DNA-templated; GO:0009735,response to cytokinin; GO:0006351,transcription, DNA-templated	Response regulator receiver domain
g24845	HSF	TF	HSF	90	34	-1.401	down	LG6	29078412	29083270	+	--	--	K09419 heat shock transcription factor, other eukaryote | (RefSeq) HSFB3; heat shock transcription factor B3 (A)	PREDICTED: heat stress transcription factor B-3 [Ipomoea nil]	RecName: Full=Heat stress transcription factor B-3; Short=AtHsfB3; AltName: Full=AtHsf-05;	SubName: Full=Uncharacterized protein {ECO:0000313|EMBL:ONH95204.1};	Heat shock transcription factor	GO:0005737,cytoplasm; GO:0005634,nucleus; GO:0003700,DNA-binding transcription factor activity; GO:0043565,sequence-specific DNA binding; GO:0046686,response to cadmium ion; GO:0006351,transcription, DNA-templated	HSF-type DNA-binding
g24862	C2H2	TF	C2H2	37	11	-1.765	down	LG6	29183582	29184477	+	--	--	--	PREDICTED: zinc finger AN1 and C2H2 domain-containing stress-associated protein 16-like [Ipomoea nil]	RecName: Full=Zinc finger AN1 and C2H2 domain-containing stress-associated protein 11; Short=AtSAP11;	SubName: Full=Uncharacterized protein {ECO:0000313|EnsemblPlants:PGSC0003DMT400060888};	Predicted Zn-finger protein	GO:0003676,nucleic acid binding; GO:0008270,zinc ion binding	Protein of unknown function (DUF629)
g24894	Others	TR	Others	526	95	-2.474	down	LG6	29386829	29389386	+	--	--	K14492 two-component response regulator ARR-A family | (RefSeq) ARR9; response regulator 9 (A)	PREDICTED: two-component response regulator ARR9-like [Ipomoea nil]	RecName: Full=Two-component response regulator ARR9; AltName: Full=Response reactor 4;	SubName: Full=Type-A response regulator {ECO:0000313|EMBL:BAL43557.1};	GATA-4/5/6 transcription factors	GO:0005634,nucleus; GO:0000156,phosphorelay response regulator activity; GO:0007623,circadian rhythm; GO:0009736,cytokinin-activated signaling pathway; GO:0000160,phosphorelay signal transduction system; GO:0006355,regulation of transcription, DNA-templated; GO:0009735,response to cytokinin; GO:0006351,transcription, DNA-templated	Response regulator receiver domain
g24965	SBP	TF	SBP	364	137	-1.402	down	LG6	29784866	29787926	-	--	--	--	PREDICTED: squamosa promoter-binding-like protein 9 [Ipomoea nil]	RecName: Full=Squamosa promoter-binding-like protein 9;	SubName: Full=Squamosa promoter-binding-like protein 9 {ECO:0000313|EMBL:OIT04332.1};	--	GO:0005737,cytoplasm; GO:0005634,nucleus; GO:0003677,DNA binding; GO:0003700,DNA-binding transcription factor activity; GO:0046872,metal ion binding; GO:0048653,anther development; GO:0048366,leaf development; GO:2000025,regulation of leaf formation; GO:0006355,regulation of transcription, DNA-templated; GO:0006351,transcription, DNA-templated	SBP domain
g25202	PLATZ	TF	PLATZ	468	85	-2.46	down	LG6	31238701	31240851	+	--	--	--	--	--	SubName: Full=uncharacterized protein LOC104227349 isoform X1 {ECO:0000313|RefSeq:XP_009777876.1};	--	--	B-box zinc finger
g25313	Others	TR	Others	76	189	1.329	up	LG7	309833	317200	-	--	--	K14491 two-component response regulator ARR-B family | (RefSeq) RR14; response regulator 14 (A)	--	RecName: Full=Two-component response regulator ORR26 {ECO:0000305}; AltName: Full=OsRRB6 {ECO:0000303|PubMed:16891544};	SubName: Full=Uncharacterized protein {ECO:0000313|EMBL:CBI31844.3};	Uncharacterized conserved protein, contains TraB domain	GO:0005634,nucleus; GO:0003677,DNA binding; GO:0003700,DNA-binding transcription factor activity; GO:0009736,cytokinin-activated signaling pathway; GO:0000160,phosphorelay signal transduction system; GO:0010082,regulation of root meristem growth; GO:0006355,regulation of transcription, DNA-templated; GO:0006351,transcription, DNA-templated	Myb-like DNA-binding domain
g25396	AP2/ERF-ERF	TF	AP2/ERF->AP2/ERF-ERF	296	16	-4.253	down	LG7	775912	776946	+	--	--	K09286 EREBP-like factor | (RefSeq) ERF104; ethylene response factor 104 (A)	--	RecName: Full=Ethylene-responsive transcription factor 5; AltName: Full=Ethylene-responsive element-binding factor 4; Short=EREBP-4; AltName: Full=Ethylene-responsive element-binding factor 5 homolog; AltName: Full=NtERF4;	SubName: Full=ethylene-responsive transcription factor 5-like {ECO:0000313|RefSeq:XP_016483897.1};	--	GO:0005634,nucleus; GO:0003677,DNA binding; GO:0003700,DNA-binding transcription factor activity; GO:0006952,defense response; GO:0009873,ethylene-activated signaling pathway; GO:0006351,transcription, DNA-templated	AP2 domain
g25499	MYB	TF	MYB->MYB	37	7	-2.496	down	LG7	1360546	1361468	-	--	--	K09422 transcription factor MYB, plant | (RefSeq) MYB73; myb domain protein 73 (A)	--	RecName: Full=Transcription factor MYB73 {ECO:0000303|PubMed:11597504}; AltName: Full=Myb-related protein 73 {ECO:0000303|PubMed:11597504}; Short=AtMYB73 {ECO:0000303|PubMed:11597504};	SubName: Full=myb protein-like {ECO:0000313|RefSeq:XP_009785340.1};	Transcription factor, Myb superfamily	GO:0005634,nucleus; GO:0003700,DNA-binding transcription factor activity; GO:0000981,DNA-binding transcription factor activity, RNA polymerase II-specific; GO:0043565,sequence-specific DNA binding; GO:0001135,RNA polymerase II transcription regulator recruiting activity; GO:0044212,transcription regulatory region DNA binding; GO:0030154,cell differentiation; GO:0019760,glucosinolate metabolic pro…	Myb DNA-binding like
g25500	bHLH	TF	bHLH	1333	565	-1.237	down	LG7	1363620	1366018	-	--	--	K13422 transcription factor MYC2 | (RefSeq) MYC2; Basic helix-loop-helix (bHLH) DNA-binding family protein (A)	--	RecName: Full=Transcription factor bHLH51; AltName: Full=Basic helix-loop-helix protein 51; Short=AtbHLH51; Short=bHLH 51; AltName: Full=Transcription factor EN 57; AltName: Full=bHLH transcription factor bHLH051;	SubName: Full=Uncharacterized protein {ECO:0000313|EnsemblPlants:PGSC0003DMT400071293};	--	GO:0005634,nucleus; GO:0003677,DNA binding; GO:0003700,DNA-binding transcription factor activity; GO:0046983,protein dimerization activity; GO:0006355,regulation of transcription, DNA-templated; GO:0006351,transcription, DNA-templated	Helix-loop-helix DNA-binding domain
g25802	NF-YA	TF	NF-Y->NF-YA	1006	2045	1.023	up	LG7	3276719	3279026	+	--	--	K08064 nuclear transcription factor Y, alpha | (RefSeq) NF-YA3; nuclear factor Y, subunit A3 (A)	PREDICTED: nuclear transcription factor Y subunit A-7-like isoform X1 [Ipomoea nil]	RecName: Full=Nuclear transcription factor Y subunit A-3; Short=AtNF-YA-3; AltName: Full=Transcriptional activator HAP2C;	SubName: Full=nuclear transcription factor Y subunit A-4-like isoform X2 {ECO:0000313|RefSeq:XP_009793851.1};	CCAAT-binding factor, subunit B (HAP2)	GO:0016602,CCAAT-binding factor complex; GO:0003677,DNA binding; GO:0003700,DNA-binding transcription factor activity; GO:0006351,transcription, DNA-templated	CCAAT-binding transcription factor (CBF-B/NF-YA) subunit B
g25833	bHLH	TF	bHLH	17	2	-2.993	down	LG7	3466921	3475586	-	--	--	K13422 transcription factor MYC2 | (RefSeq) MYC2; Basic helix-loop-helix (bHLH) DNA-binding family protein (A)	PREDICTED: putative transcription factor bHLH041 isoform X2 [Ipomoea nil]	RecName: Full=Putative transcription factor bHLH041; AltName: Full=Basic helix-loop-helix protein 41; Short=AtbHLH41; Short=bHLH 41; AltName: Full=Transcription factor EN 51; AltName: Full=bHLH transcription factor bHLH041;	SubName: Full=putative transcription factor bHLH041 isoform X1 {ECO:0000313|RefSeq:XP_016579365.1};	--	GO:0005634,nucleus; GO:0003677,DNA binding; GO:0003700,DNA-binding transcription factor activity; GO:0046983,protein dimerization activity; GO:0006355,regulation of transcription, DNA-templated; GO:0010200,response to chitin; GO:0006351,transcription, DNA-templated	Helix-loop-helix DNA-binding domain
g26142	AP2/ERF-ERF	TF	AP2/ERF->AP2/ERF-ERF	13	1	-4.387	down	LG7	5750310	5751172	-	--	--	K09286 EREBP-like factor | (RefSeq) ERF9; erf domain protein 9 (A)	PREDICTED: ethylene-responsive transcription factor WIN1-like [Ipomoea nil]	RecName: Full=Ethylene-responsive transcription factor WIN1; AltName: Full=Protein SHINE 1; AltName: Full=Protein WAX INDUCER 1;	SubName: Full=ethylene-responsive transcription factor WIN1-like {ECO:0000313|RefSeq:XP_016485293.1};	--	GO:0005634,nucleus; GO:0003700,DNA-binding transcription factor activity; GO:0043565,sequence-specific DNA binding; GO:0010143,cutin biosynthetic process; GO:0009873,ethylene-activated signaling pathway; GO:0009414,response to water deprivation; GO:0006351,transcription, DNA-templated; GO:0010166,wax metabolic process	AP2 domain
g26331	AUX/IAA	TR	AUX/IAA	840	1813	1.111	up	LG7	7273455	7279088	-	--	--	--	PREDICTED: NEDD8 ultimate buster 1 [Ipomoea nil]	--	SubName: Full=NEDD8 ultimate buster 1-like {ECO:0000313|RefSeq:XP_016516026.1};	Adaptor protein NUB1, contains UBA domain	--	UBA-like domain (DUF1421)
g26921	AP2/ERF-ERF	TF	AP2/ERF->AP2/ERF-ERF	39	5	-2.986	down	LG7	12321761	12323439	+	--	--	K09286 EREBP-like factor | (RefSeq) EBP; ethylene-responsive element binding protein (A)	--	RecName: Full=Ethylene-responsive transcription factor CRF4; AltName: Full=Protein CYTOKININ RESPONSE FACTOR 4;	SubName: Full=ethylene-responsive transcription factor CRF4-like {ECO:0000313|RefSeq:XP_016445500.1};	--	GO:0005737,cytoplasm; GO:0005634,nucleus; GO:0003677,DNA binding; GO:0003700,DNA-binding transcription factor activity; GO:0009736,cytokinin-activated signaling pathway; GO:0009873,ethylene-activated signaling pathway; GO:0048366,leaf development; GO:0006351,transcription, DNA-templated	AP2 domain
g27036	Pseudo ARR-B	TR	Pseudo ARR-B	71	279	1.974	up	LG7	13351678	13356455	-	--	--	K12128 pseudo-response regulator 9 | (RefSeq) PRR9; pseudo-response regulator 9 (A)	--	RecName: Full=Two-component response regulator-like APRR9; AltName: Full=Pseudo-response regulator 9;	SubName: Full=two-component response regulator-like APRR5 isoform X2 {ECO:0000313|RefSeq:XP_016456692.1};	GATA-4/5/6 transcription factors	GO:0005634,nucleus; GO:0003677,DNA binding; GO:0007623,circadian rhythm; GO:0045892,negative regulation of transcription, DNA-templated; GO:0000160,phosphorelay signal transduction system; GO:0010017,red or far-red light signaling pathway; GO:0006355,regulation of transcription, DNA-templated; GO:0006351,transcription, DNA-templated	CCT motif
g27214	HB-HD-ZIP	TF	HB->HB-HD-ZIP	121	627	2.375	up	LG7	14622720	14624080	-	--	--	K09338 homeobox-leucine zipper protein | (RefSeq) HB-12; homeobox 12 (A)	--	RecName: Full=Homeobox-leucine zipper protein ATHB-7; AltName: Full=HD-ZIP protein ATHB-7; AltName: Full=Homeodomain transcription factor ATHB-7;	--	Transcription factor HEX, contains HOX and HALZ domains	GO:0005634,nucleus; GO:0003700,DNA-binding transcription factor activity; GO:0043565,sequence-specific DNA binding; GO:0045893,positive regulation of transcription, DNA-templated; GO:0009737,response to abscisic acid; GO:0009414,response to water deprivation; GO:0006351,transcription, DNA-templated	Homeobox KN domain
g27243	Pseudo ARR-B	TR	Pseudo ARR-B	243	1063	2.132	up	LG7	14879520	14884336	+	--	--	K12128 pseudo-response regulator 9 | (RefSeq) PRR9; pseudo-response regulator 9 (A)	--	RecName: Full=Two-component response regulator-like APRR9; AltName: Full=Pseudo-response regulator 9;	--	GATA-4/5/6 transcription factors	GO:0005634,nucleus; GO:0003677,DNA binding; GO:0007623,circadian rhythm; GO:0045892,negative regulation of transcription, DNA-templated; GO:0000160,phosphorelay signal transduction system; GO:0010017,red or far-red light signaling pathway; GO:0006355,regulation of transcription, DNA-templated; GO:0006351,transcription, DNA-templated	CCT motif
g27423	mTERF	TR	mTERF	22	56	1.331	up	LG7	16228299	16230041	-	--	--	K15032 mTERF domain-containing protein, mitochondrial | (RefSeq) pde191; Mitochondrial transcription termination factor family protein (A)	--	RecName: Full=Transcription termination factor MTERF6, chloroplastic/mitochondrial {ECO:0000305}; AltName: Full=Mitochondrial transcription termination factor 6 {ECO:0000303|PubMed:23087700}; AltName: Full=Protein PIGMENT DEFECTIVE 191 {ECO:0000305}; Flags: Precursor;	--	Mitochondrial transcription termination factor, mTERF	GO:0009507,chloroplast; GO:0005739,mitochondrion; GO:0003690,double-stranded DNA binding; GO:0003723,RNA binding; GO:0006353,DNA-templated transcription, termination; GO:0006355,regulation of transcription, DNA-templated; GO:0008033,tRNA processing	Iron dependent repressor, metal binding and dimerisation domain
g27665	DDT	TR	DDT	34	7	-2.322	down	LG7	17932479	17936040	+	--	--	--	PREDICTED: DDT domain-containing protein DDB_G0282237-like isoform X2 [Ipomoea nil]	RecName: Full=Homeobox-DDT domain protein RLT1 {ECO:0000305}; AltName: Full=Protein HOMEOBOX-1 {ECO:0000305}; AltName: Full=Protein RINGLET 1 {ECO:0000303|PubMed:22694359};	SubName: Full=Uncharacterized protein {ECO:0000313|EnsemblPlants:PGSC0003DMT400060265};	Chromatin remodeling complex WSTF-ISWI, large subunit (contains heterochromatin localization, PHD and BROMO domains)	GO:0005634,nucleus; GO:0003677,DNA binding; GO:0003700,DNA-binding transcription factor activity; GO:0009908,flower development; GO:0045892,negative regulation of transcription, DNA-templated; GO:0048510,regulation of timing of transition from vegetative to reproductive phase; GO:0006351,transcription, DNA-templated	ATP-utilising chromatin assembly and remodelling N-terminal
g27756	zf-HD	TF	zf-HD	13	0	-6.288	down	LG7	18533635	18538701	+	--	--	--	PREDICTED: zinc-finger homeodomain protein 4-like [Ipomoea nil]	RecName: Full=Zinc-finger homeodomain protein 4; Short=AtZHD4; AltName: Full=Homeobox protein 31; Short=AtHB-31; AltName: Full=Protein FLORAL TRANSITION AT THE MERISTEM 2;	SubName: Full=Uncharacterized protein {ECO:0000313|EMBL:PIA55286.1};	--	GO:0005634,nucleus; GO:0003677,DNA binding; GO:0046872,metal ion binding; GO:0042803,protein homodimerization activity; GO:0048574,long-day photoperiodism, flowering; GO:0006355,regulation of transcription, DNA-templated; GO:0006351,transcription, DNA-templated	ZF-HD protein dimerisation region
g28394	NAC	TF	NAC	224	51	-2.138	down	LG7	22909075	22911297	+	--	--	--	PREDICTED: NAC domain-containing protein 2-like [Ipomoea nil]	RecName: Full=NAC domain-containing protein 2; Short=ANAC002;	SubName: Full=NAC1 {ECO:0000313|EMBL:ACT55332.1};	--	GO:0005634,nucleus; GO:0003677,DNA binding; GO:0003700,DNA-binding transcription factor activity; GO:0009788,negative regulation of abscisic acid-activated signaling pathway; GO:0009611,response to wounding; GO:0006351,transcription, DNA-templated	No apical meristem (NAM) protein
g288	NAC	TF	NAC	158	15	-3.478	down	LG1	1504025	1505644	-	--	--	--	PREDICTED: NAC domain-containing protein 72-like [Ipomoea nil]	RecName: Full=NAC domain-containing protein 72; Short=ANAC072; AltName: Full=Protein RESPONSIVE TO DESICCATION 26;	SubName: Full=NAC domain-containing protein 72-like {ECO:0000313|RefSeq:XP_016484889.1};	--	GO:0005634,nucleus; GO:0003677,DNA binding; GO:0006355,regulation of transcription, DNA-templated; GO:0006351,transcription, DNA-templated	No apical meristem (NAM) protein
g28855	AP2/ERF-ERF	TF	AP2/ERF->AP2/ERF-ERF	827	170	-2.283	down	LG7	26211842	26213554	-	--	--	K09286 EREBP-like factor | (RefSeq) RAP2.4; related to AP2 4 (A)	PREDICTED: ethylene-responsive transcription factor ERF060-like [Ipomoea nil]	RecName: Full=Ethylene-responsive transcription factor RAP2-4; AltName: Full=Ethylene-responsive transcription factor ERF059; AltName: Full=Protein RELATED TO APETALA2 4;	SubName: Full=Ethylene-responsive transcription factor rap2-4 {ECO:0000313|EMBL:OIS95618.1};	--	GO:0005634,nucleus; GO:0003677,DNA binding; GO:0003700,DNA-binding transcription factor activity; GO:0043565,sequence-specific DNA binding; GO:0071472,cellular response to salt stress; GO:0009736,cytokinin-activated signaling pathway; GO:0009873,ethylene-activated signaling pathway; GO:0045595,regulation of cell differentiation; GO:0009409,response to cold; GO:0009416,response to light stimulus; …	AP2 domain
g28911	WRKY	TF	WRKY	1854	660	-1.491	down	LG7	26649648	26651739	-	--	--	K13425 WRKY transcription factor 22 | (RefSeq) WRKY22; WRKY family transcription factor (A)	PREDICTED: probable WRKY transcription factor 7 [Ipomoea nil]	RecName: Full=Probable WRKY transcription factor 7; AltName: Full=WRKY DNA-binding protein 7;	SubName: Full=Uncharacterized protein {ECO:0000313|EnsemblPlants:PGSC0003DMT400064256};	--	GO:0005634,nucleus; GO:0005516,calmodulin binding; GO:0003700,DNA-binding transcription factor activity; GO:0043565,sequence-specific DNA binding; GO:0006351,transcription, DNA-templated	Plant zinc cluster domain
g29040	LOB	TF	LOB	1276	227	-2.49	down	LG7	27558292	27560598	-	--	--	--	--	RecName: Full=LOB domain-containing protein 37; AltName: Full=ASYMMETRIC LEAVES 2-like protein 39; Short=AS2-like protein 39;	SubName: Full=Uncharacterized protein {ECO:0000313|EMBL:PIN22806.1};	--	GO:0006807,nitrogen compound metabolic process; GO:0060776,simple leaf morphogenesis	Lateral organ boundaries (LOB) domain
g29047	TAZ	TR	TAZ	131	25	-2.428	down	LG7	27624218	27626648	-	--	--	K04498 E1A/CREB-binding protein [EC:2.3.1.48] | (RefSeq) HAC1; histone acetyltransferase of the CBP family 1 (A)	--	RecName: Full=BTB/POZ and TAZ domain-containing protein 4; AltName: Full=BTB and TAZ domain protein 4;	SubName: Full=BTB/POZ and TAZ domain-containing protein 4 {ECO:0000313|RefSeq:XP_016560955.1, ECO:0000313|RefSeq:XP_016560956.1};	CREB binding protein/P300 and related TAZ Zn-finger proteins	GO:0005737,cytoplasm; GO:0005634,nucleus; GO:0019005,SCF ubiquitin ligase complex; GO:0005774,vacuolar membrane; GO:0005516,calmodulin binding; GO:0004402,histone acetyltransferase activity; GO:0003712,transcription coregulator activity; GO:0031625,ubiquitin protein ligase binding; GO:0008270,zinc ion binding; GO:0043161,proteasome-mediated ubiquitin-dependent protein catabolic process; GO:004278…	BTB And C-terminal Kelch
g29056	GRAS	TF	GRAS	74	24	-1.605	down	LG7	27681334	27683114	+	--	--	K14494 DELLA protein | (RefSeq) RGL2; RGA-like 2 (A)	--	RecName: Full=Protein SHORT-ROOT; Short=AtSHR; AltName: Full=GRAS family protein 26; Short=AtGRAS-26; AltName: Full=Protein SHOOT GRAVITROPISM 7;	SubName: Full=Putative SHORT-ROOT protein {ECO:0000313|EMBL:BAF91723.1};	--	GO:0005769,early endosome; GO:0005770,late endosome; GO:0005634,nucleus; GO:0055037,recycling endosome; GO:0003700,DNA-binding transcription factor activity; GO:0043565,sequence-specific DNA binding; GO:0008356,asymmetric cell division; GO:0055072,iron ion homeostasis; GO:0048366,leaf development; GO:0045930,negative regulation of mitotic cell cycle; GO:0009956,radial pattern formation; GO:003235…	GRAS domain family
g29088	GRF	TF	GRF	50	128	1.336	up	LG7	27883753	27886802	-	--	--	--	--	RecName: Full=Growth-regulating factor 2; Short=AtGRF2; AltName: Full=Transcription activator GRF2;	SubName: Full=growth-regulating factor 1-like {ECO:0000313|RefSeq:XP_016437615.1};	--	GO:0005634,nucleus; GO:0005524,ATP binding; GO:0008285,negative regulation of cell proliferation; GO:0006355,regulation of transcription, DNA-templated; GO:0048364,root development; GO:0006351,transcription, DNA-templated	QLQ
g29126	bHLH	TF	bHLH	5360	1678	-1.676	down	LG7	28218012	28219737	-	--	--	K13422 transcription factor MYC2 | (RefSeq) MYC2; Basic helix-loop-helix (bHLH) DNA-binding family protein (A)	--	RecName: Full=Transcription factor bHLH93; AltName: Full=Basic helix-loop-helix protein 93; Short=AtbHLH93; Short=bHLH 93; AltName: Full=Transcription factor EN 47; AltName: Full=bHLH transcription factor bHLH093;	--	--	GO:0005634,nucleus; GO:0003677,DNA binding; GO:0003700,DNA-binding transcription factor activity; GO:0046983,protein dimerization activity; GO:0045487,gibberellin catabolic process; GO:0007275,multicellular organism development; GO:0010371,regulation of gibberellin biosynthetic process; GO:0006351,transcription, DNA-templated	Helix-loop-helix DNA-binding domain
g2918	NF-YA	TF	NF-Y->NF-YA	4	21	2.282	up	LG1	20498554	20501211	+	--	--	K08064 nuclear transcription factor Y, alpha | (RefSeq) NF-YA5; nuclear factor Y, subunit A5 (A)	--	RecName: Full=Nuclear transcription factor Y subunit A-5; Short=AtNF-YA-5;	--	CCAAT-binding factor, subunit B (HAP2)	GO:0016602,CCAAT-binding factor complex; GO:0003677,DNA binding; GO:0003700,DNA-binding transcription factor activity; GO:0009738,abscisic acid-activated signaling pathway; GO:0009785,blue light signaling pathway; GO:0009793,embryo development ending in seed dormancy; GO:0045892,negative regulation of transcription, DNA-templated; GO:0009414,response to water deprivation; GO:0048316,seed developm…	CCAAT-binding transcription factor (CBF-B/NF-YA) subunit B
g29254	HB-other	TF	HB->HB-other	0	13	5.093	up	LG7	29106655	29108955	-	--	--	K09338 homeobox-leucine zipper protein | (RefSeq) HB40; homeobox protein 40 (A)	--	RecName: Full=Homeobox-leucine zipper protein ATHB-40; AltName: Full=HD-ZIP protein ATHB-40; AltName: Full=Homeodomain transcription factor ATHB-40;	--	Transcription factor HEX, contains HOX and HALZ domains	GO:0005634,nucleus; GO:0003700,DNA-binding transcription factor activity; GO:0043565,sequence-specific DNA binding; GO:0009733,response to auxin; GO:0006351,transcription, DNA-templated	Homeobox KN domain
g29295	OFP	TF	OFP	295	34	-3.132	down	LG7	29414835	29416117	-	--	--	--	--	RecName: Full=Transcription repressor OFP7; AltName: Full=Ovate family protein 7; Short=AtOFP7;	--	--	GO:0005634,nucleus; GO:0005886,plasma membrane; GO:0045892,negative regulation of transcription, DNA-templated; GO:0006351,transcription, DNA-templated	Transcriptional repressor, ovate
g29528	HMG	TR	HMG	2336	1118	-1.063	down	LG7	30916324	30918238	+	--	--	K10802 high mobility group protein B1 | (RefSeq) HMGB1; high mobility group B1 (A)	--	RecName: Full=HMG1/2-like protein;	--	HMG box-containing protein	GO:0005634,nucleus; GO:0003677,DNA binding	Protamine and protamine like
g29877	HB-WOX	TF	HB->HB-WOX	279	125	-1.156	down	LG7	33433853	33440628	-	--	--	--	PREDICTED: WUSCHEL-related homeobox 8-like [Ipomoea nil]	RecName: Full=WUSCHEL-related homeobox 8; AltName: Full=OsWOX8; AltName: Full=Protein WOX13;	SubName: Full=Uncharacterized protein {ECO:0000313|EnsemblPlants:PGSC0003DMT400003980};	--	GO:0005634,nucleus; GO:0003677,DNA binding; GO:0007275,multicellular organism development; GO:0006355,regulation of transcription, DNA-templated; GO:0006351,transcription, DNA-templated	Homeodomain
g29944	B3	TF	B3->B3	183	413	1.17	up	LG7	33850608	33854653	-	--	--	--	PREDICTED: B3 domain-containing protein REM9-like [Ipomoea nil]	RecName: Full=B3 domain-containing protein REM5; AltName: Full=Auxin response factor 22; AltName: Full=Protein REPRODUCTIVE MERISTEM 5;	SubName: Full=putative B3 domain-containing protein At5g66980 {ECO:0000313|RefSeq:XP_016458240.1};	--	GO:0005634,nucleus; GO:0003677,DNA binding; GO:0006355,regulation of transcription, DNA-templated; GO:0006351,transcription, DNA-templated	B3 DNA binding domain
g30000	Others	TR	Others	281	136	-1.055	down	LG7	34144641	34148632	+	--	--	K12135 zinc finger protein CONSTANS | (RefSeq) CO; B-box type zinc finger protein with CCT domain-containing protein (A)	PREDICTED: zinc finger protein CONSTANS-LIKE 2-like [Ipomoea nil]	RecName: Full=Zinc finger protein CONSTANS-LIKE 2;	SubName: Full=Uncharacterized protein {ECO:0000313|EMBL:CDP02370.1};	GATA-4/5/6 transcription factors	GO:0005634,nucleus; GO:0003677,DNA binding; GO:0003700,DNA-binding transcription factor activity; GO:0008270,zinc ion binding; GO:0009658,chloroplast organization; GO:0009909,regulation of flower development; GO:0009416,response to light stimulus; GO:0006351,transcription, DNA-templated	CCT motif
g30003	bZIP	TF	bZIP	30	2	-4.12	down	LG7	34161573	34162546	-	--	--	K09060 plant G-box-binding factor | (RefSeq) bZIP16; basic region/leucine zipper transcription factor 16 (A)	PREDICTED: basic leucine zipper 43-like [Ipomoea nil]	RecName: Full=Basic leucine zipper 43 {ECO:0000303|PubMed:11906833}; Short=AtbZIP43 {ECO:0000303|PubMed:11906833}; Short=bZIP protein 43 {ECO:0000303|PubMed:11906833};	SubName: Full=Uncharacterized protein {ECO:0000313|EMBL:CDP02366.1};	--	GO:0005634,nucleus; GO:0003677,DNA binding; GO:0003700,DNA-binding transcription factor activity; GO:0006351,transcription, DNA-templated	SWI5-dependent HO expression protein 3
g30074	C2C2-Dof	TF	C2C2->C2C2-Dof	749	258	-1.539	down	LG7	34653634	34656947	-	--	--	K16222 Dof zinc finger protein DOF5.5 | (RefSeq) CDF1; cycling DOF factor 1 (A)	PREDICTED: cyclic dof factor 2 [Ipomoea nil]	RecName: Full=Cyclic dof factor 2; AltName: Full=Dof zinc finger protein DOF5.2; Short=AtDOF5.2;	SubName: Full=Uncharacterized protein {ECO:0000313|EMBL:PHT89644.1};	--	GO:0005634,nucleus; GO:0003700,DNA-binding transcription factor activity; GO:0046872,metal ion binding; GO:0043565,sequence-specific DNA binding; GO:0009908,flower development; GO:0006355,regulation of transcription, DNA-templated; GO:0006351,transcription, DNA-templated	Dof domain, zinc finger
g30152	PHD	TR	PHD	8	62	2.992	up	LG7	35047643	35056675	+	--	--	K22768 methyl-CpG-binding domain-containing protein 9 [EC:2.3.1.48] | (RefSeq) MBD9; methyl-CPG-binding domain 9 (A)	PREDICTED: methyl-CpG-binding domain-containing protein 9-like [Ipomoea nil]	RecName: Full=Methyl-CpG-binding domain-containing protein 9; Short=AtMBD9; Short=MBD09; EC=2.3.1.48; AltName: Full=Histone acetyl transferase MBD9; AltName: Full=Methyl-CpG-binding protein MBD9;	SubName: Full=methyl-CpG-binding domain-containing protein 9 isoform X2 {ECO:0000313|RefSeq:XP_018823068.1};	--	GO:0005720,nuclear heterochromatin; GO:0005634,nucleus; GO:0009506,plasmodesma; GO:0004402,histone acetyltransferase activity; GO:0042393,histone binding; GO:0046872,metal ion binding; GO:0008327,methyl-CpG binding; GO:0061630,ubiquitin protein ligase activity; GO:0016573,histone acetylation; GO:0043966,histone H3 acetylation; GO:0043967,histone H4 acetylation; GO:0010216,maintenance of DNA methy…	Williams-Beuren syndrome DDT (WSD), D-TOX E motif
g30179	NAC	TF	NAC	76	213	1.488	up	LG7	35203366	35205766	+	--	--	--	PREDICTED: NAC domain-containing protein 8-like [Ipomoea nil]	RecName: Full=SUPPRESSOR OF GAMMA RESPONSE 1 {ECO:0000303|PubMed:19549833}; AltName: Full=NAC domain-containing protein 8 {ECO:0000303|PubMed:15029955}; Short=ANAC008 {ECO:0000303|PubMed:15029955}; AltName: Full=Protein SOG1; AltName: Full=SUPPRESSOR OF GAMMA RADIATION 1;	SubName: Full=Nac domain-containing protein 8 {ECO:0000313|EMBL:OIT19314.1};	--	GO:0005634,nucleus; GO:0003700,DNA-binding transcription factor activity; GO:0043565,sequence-specific DNA binding; GO:0000077,DNA damage checkpoint; GO:0040020,regulation of meiotic nuclear division; GO:0010332,response to gamma radiation; GO:0006351,transcription, DNA-templated	No apical meristem (NAM) protein
g30438	AP2/ERF-ERF	TF	AP2/ERF->AP2/ERF-ERF	15	1	-4.506	down	LG8	1066115	1067210	+	--	--	K09286 EREBP-like factor | (RefSeq) ERF-1; ethylene responsive element binding factor 1 (A)	PREDICTED: ethylene-responsive transcription factor 2-like [Ipomoea nil]	RecName: Full=Ethylene-responsive transcription factor 2; Short=NtERF2; AltName: Full=Ethylene-responsive element-binding factor 2; Short=EREBP-2;	SubName: Full=Uncharacterized protein {ECO:0000313|EMBL:PIN20674.1};	--	GO:0005634,nucleus; GO:0003677,DNA binding; GO:0003700,DNA-binding transcription factor activity; GO:0006952,defense response; GO:0009873,ethylene-activated signaling pathway; GO:0006351,transcription, DNA-templated	AP2 domain
g305	C3H	TF	C3H	317	640	1.013	up	LG1	1599649	1603691	-	--	--	--	PREDICTED: zinc finger CCCH domain-containing protein 43-like isoform X1 [Ipomoea nil]	RecName: Full=Zinc finger CCCH domain-containing protein 43; Short=AtC3H43; AltName: Full=Zinc finger CCCH domain-containing protein ZFN-like 6;	SubName: Full=Uncharacterized protein {ECO:0000313|EMBL:EMJ11136.1};	CCCH-type Zn-finger protein	GO:0005634,nucleus; GO:0003677,DNA binding; GO:0046872,metal ion binding	Torus domain
g30557	Others	TR	Others	1322	521	-1.343	down	LG8	1740217	1741672	-	--	--	K14492 two-component response regulator ARR-A family | (RefSeq) ARR9; response regulator 9 (A)	PREDICTED: translation initiation factor eIF-2B subunit beta isoform X2 [Ipomoea nil]	RecName: Full=Two-component response regulator ORR4 {ECO:0000305}; AltName: Full=OsRR4 {ECO:0000303|PubMed:16919402};	SubName: Full=two-component response regulator ORR10-like {ECO:0000313|RefSeq:XP_016451923.1};	GATA-4/5/6 transcription factors	GO:0005634,nucleus; GO:0009736,cytokinin-activated signaling pathway; GO:0000160,phosphorelay signal transduction system; GO:0006355,regulation of transcription, DNA-templated; GO:0006351,transcription, DNA-templated	Response regulator receiver domain
g30588	AP2/ERF-AP2	TF	AP2/ERF->AP2/ERF-AP2	192	87	-1.145	down	LG8	1891004	1896584	+	--	--	K09284 AP2-like factor, euAP2 lineage | (RefSeq) AP2; Integrase-type DNA-binding superfamily protein (A)	PREDICTED: ethylene-responsive transcription factor RAP2-7-like [Ipomoea nil]	RecName: Full=Floral homeotic protein APETALA 2 {ECO:0000303|PubMed:7919989};	SubName: Full=APETALA2B {ECO:0000313|EMBL:BAD36744.1};	--	GO:0005634,nucleus; GO:0003677,DNA binding; GO:0003700,DNA-binding transcription factor activity; GO:0030154,cell differentiation; GO:0009908,flower development; GO:0010073,meristem maintenance; GO:0048481,plant ovule development; GO:0048316,seed development; GO:0010093,specification of floral organ identity; GO:0006351,transcription, DNA-templated	AP2 domain
g30612	Others	TR	Others	2204	4613	1.066	up	LG8	1977937	1981049	-	--	--	K12135 zinc finger protein CONSTANS | (RefSeq) CO; B-box type zinc finger protein with CCT domain-containing protein (A)	PREDICTED: B-box zinc finger protein 22-like [Ipomoea nil]	RecName: Full=B-box zinc finger protein 22 {ECO:0000303|PubMed:19920209}; AltName: Full=Protein DOUBLE B-BOX 3 {ECO:0000303|PubMed:18540109}; AltName: Full=Protein LIGHT-REGULATED ZINC FINGER PROTEIN 1 {ECO:0000303|PubMed:18796637}; AltName: Full=Protein SALT TOLERANCE HOMOLOG 3;	SubName: Full=Uncharacterized protein {ECO:0000313|EnsemblPlants:Solyc07g062160.2.1};	--	GO:0005634,nucleus; GO:0000989,NA; GO:0008270,zinc ion binding; GO:0006355,regulation of transcription, DNA-templated; GO:0006351,transcription, DNA-templated	Cytoplasmic polyadenylation element-binding protein ZZ domain
g30808	AP2/ERF-ERF	TF	AP2/ERF->AP2/ERF-ERF	1830	508	-1.851	down	LG8	3005462	3006512	+	--	--	K09286 EREBP-like factor | (RefSeq) ERF9; erf domain protein 9 (A)	ethylene response factor 4 [Ipomoea batatas]	RecName: Full=Ethylene-responsive transcription factor 4; AltName: Full=Ethylene-responsive element-binding factor 3; Short=EREBP-3; AltName: Full=Ethylene-responsive element-binding factor 4 homolog; AltName: Full=NsERF3;	SubName: Full=Ethylene response factor 4 {ECO:0000313|EMBL:ARS72978.1};	--	GO:0005634,nucleus; GO:0003677,DNA binding; GO:0003700,DNA-binding transcription factor activity; GO:0006952,defense response; GO:0009873,ethylene-activated signaling pathway; GO:0006351,transcription, DNA-templated	AP2 domain
g30909	Others	TR	Others	1180	540	-1.13	down	LG8	3555777	3556983	-	--	--	K12135 zinc finger protein CONSTANS | (RefSeq) CO; B-box type zinc finger protein with CCT domain-containing protein (A)	PREDICTED: zinc finger protein CONSTANS-LIKE 2-like isoform X2 [Ipomoea nil]	RecName: Full=B-box domain protein 31 {ECO:0000303|PubMed:19920209}; Short=AtBBX31 {ECO:0000303|PubMed:19920209}; AltName: Full=Microprotein 1B {ECO:0000303|PubMed:27015278};	SubName: Full=Uncharacterized protein {ECO:0000313|EMBL:OIT01738.1};	--	GO:0005634,nucleus; GO:0003700,DNA-binding transcription factor activity; GO:0030674,protein binding, bridging; GO:0008270,zinc ion binding; GO:0007623,circadian rhythm; GO:0009909,regulation of flower development; GO:0006355,regulation of transcription, DNA-templated; GO:0010224,response to UV-B	B-box zinc finger
g31186	Tify	TF	Tify	764	267	-1.513	down	LG8	5297392	5300025	+	--	--	K13464 jasmonate ZIM domain-containing protein | (RefSeq) JAZ1; jasmonate-zim-domain protein 1 (A)	--	RecName: Full=Protein TIFY 10A; AltName: Full=Jasmonate ZIM domain-containing protein 1;	--	--	GO:0005634,nucleus; GO:0003714,transcription corepressor activity; GO:0042742,defense response to bacterium; GO:0009908,flower development; GO:0009867,jasmonic acid mediated signaling pathway; GO:1903507,negative regulation of nucleic acid-templated transcription; GO:0009555,pollen development; GO:1900067,regulation of cellular response to alkaline pH; GO:0031347,regulation of defense response; G…	tify domain
g31288	Tify	TF	Tify	8156	3925	-1.056	down	LG8	6009732	6011896	-	--	--	K13464 jasmonate ZIM domain-containing protein | (RefSeq) JAZ6; jasmonate-zim-domain protein 6 (A)	--	RecName: Full=Protein TIFY 11B; AltName: Full=Jasmonate ZIM domain-containing protein 6;	--	--	GO:0005634,nucleus; GO:0003714,transcription corepressor activity; GO:0006952,defense response; GO:1903507,negative regulation of nucleic acid-templated transcription; GO:0031347,regulation of defense response; GO:2000022,regulation of jasmonic acid mediated signaling pathway; GO:0006355,regulation of transcription, DNA-templated; GO:0009753,response to jasmonic acid; GO:0009611,response to wound…	Divergent CCT motif
g31550	WRKY	TF	WRKY	93	15	-2.642	down	LG8	7799209	7801033	-	--	--	K18834 WRKY transcription factor 1 | (RefSeq) ZAP1; zinc-dependent activator protein-1 (A)	PREDICTED: probable WRKY transcription factor 40 [Ipomoea nil]	RecName: Full=Probable WRKY transcription factor 40; AltName: Full=WRKY DNA-binding protein 40;	SubName: Full=Uncharacterized protein {ECO:0000313|EnsemblPlants:Solyc03g116890.2.1};	--	GO:0005634,nucleus; GO:0003700,DNA-binding transcription factor activity; GO:0043565,sequence-specific DNA binding; GO:0044212,transcription regulatory region DNA binding; GO:0042742,defense response to bacterium; GO:0050832,defense response to fungus; GO:0045892,negative regulation of transcription, DNA-templated; GO:0031347,regulation of defense response; GO:0010200,response to chitin; GO:00022…	Protein of unknown function (DUF4527)
g31682	NAC	TF	NAC	28	4	-2.85	down	LG8	8802169	8807242	-	--	--	--	PREDICTED: NAC domain-containing protein 86 isoform X1 [Ipomoea nil]	RecName: Full=NAC domain-containing protein 86 {ECO:0000312|EMBL:AED92405.1}; AltName: Full=NAM-like protein {ECO:0000312|EMBL:BAB10513.1}; AltName: Full=No apical meristem-like protein {ECO:0000312|EMBL:BAB10513.1};	SubName: Full=NAC domain-containing protein 74 isoform X1 {ECO:0000313|RefSeq:XP_009790484.1};	--	GO:0005634,nucleus; GO:0003677,DNA binding; GO:0003700,DNA-binding transcription factor activity; GO:0090603,sieve element differentiation; GO:0090602,sieve element enucleation; GO:0006351,transcription, DNA-templated	No apical meristem (NAM) protein
g31982	MADS-M-type	TF	MADS->MADS-M-type	1	17	3.52	up	LG8	11331818	11333604	+	--	--	K09264 MADS-box transcription factor, plant | (RefSeq) AP1; K-box region and MADS-box transcription factor family protein (A)	PREDICTED: truncated transcription factor CAULIFLOWER A-like isoform X1 [Ipomoea nil]	RecName: Full=Agamous-like MADS-box protein AGL8 homolog;	SubName: Full=Agamous-like MADS-box protein AGL8 {ECO:0000313|EMBL:KHN10636.1}; EC=1.3.1.74 {ECO:0000313|EMBL:KHN10636.1};	MADS box transcription factor	GO:0005634,nucleus; GO:0003700,DNA-binding transcription factor activity; GO:0046983,protein dimerization activity; GO:0000977,RNA polymerase II regulatory region sequence-specific DNA binding; GO:0045944,positive regulation of transcription by RNA polymerase II; GO:0006351,transcription, DNA-templated	SRF-type transcription factor (DNA-binding and dimerisation domain)
g32754	DDT	TR	DDT	76	163	1.099	up	LG8	17378669	17381402	+	--	--	K21797 phosphatidylinositol 4-phosphatase [EC:3.1.3.-] | (RefSeq) SAC8; SAC domain-containing protein 8 (A)	PREDICTED: phosphoinositide phosphatase SAC8 isoform X2 [Ipomoea nil]	RecName: Full=Phosphoinositide phosphatase SAC8; Short=AtSAC8; EC=3.1.3.-; AltName: Full=Protein SUPPRESSOR OF ACTIN 1A; Short=AtSAC1a; AltName: Full=Protein SUPPRESSOR OF ACTIN 8; AltName: Full=Putative transmembrane protein G5p; Short=AtG5; AltName: Full=SAC domain protein 8; AltName: Full=SAC1-like protein AtSAC1a;	SubName: Full=Uncharacterized protein {ECO:0000313|EMBL:KQK22163.1};	Putative phosphoinositide phosphatase	GO:0005783,endoplasmic reticulum; GO:0005789,endoplasmic reticulum membrane; GO:0016021,integral component of membrane; GO:0052866,phosphatidylinositol phosphate phosphatase activity	SacI homology domain
g33256	NAC	TF	NAC	63	17	-1.932	down	LG8	21195043	21203132	+	--	--	--	PREDICTED: NAC domain-containing protein 83-like [Ipomoea nil]	RecName: Full=NAC domain-containing protein 83 {ECO:0000303|PubMed:15029955}; Short=ANAC083 {ECO:0000303|PubMed:15029955}; AltName: Full=Protein VND-INTERACTING 2 {ECO:0000303|PubMed:20388856};	SubName: Full=NAC domain-containing protein 83-like {ECO:0000313|RefSeq:XP_016434644.1};	--	GO:0005634,nucleus; GO:0003677,DNA binding; GO:0003700,DNA-binding transcription factor activity; GO:0010150,leaf senescence; GO:0045892,negative regulation of transcription, DNA-templated; GO:0009737,response to abscisic acid; GO:0009651,response to salt stress; GO:0006351,transcription, DNA-templated; GO:0016032,viral process; GO:0010089,xylem development	No apical meristem (NAM) protein
g33760	C2C2-Dof	TF	C2C2->C2C2-Dof	118	41	-1.509	down	LG8	25373482	25375204	-	--	--	K16222 Dof zinc finger protein DOF5.5 | (RefSeq) CDF1; cycling DOF factor 1 (A)	Zinc finger, Dof-type [Corchorus capsularis]	RecName: Full=Dof zinc finger protein DOF5.6; Short=AtDOF5.6;	SubName: Full=Zinc finger, Dof-type {ECO:0000313|EMBL:OMO92104.1};	--	GO:0005634,nucleus; GO:0003677,DNA binding; GO:0003700,DNA-binding transcription factor activity; GO:0046872,metal ion binding; GO:0010087,phloem or xylem histogenesis; GO:0045893,positive regulation of transcription, DNA-templated; GO:0010067,procambium histogenesis; GO:0006355,regulation of transcription, DNA-templated; GO:0006351,transcription, DNA-templated	Dof domain, zinc finger
g33829	B3	TF	B3->B3	125	39	-1.692	down	LG8	25877586	25880443	+	--	--	--	PREDICTED: B3 domain-containing protein REM5-like [Ipomoea nil]	RecName: Full=Putative B3 domain-containing protein At5g66980;	SubName: Full=Uncharacterized protein {ECO:0000313|EMBL:PIN08005.1};	--	GO:0005634,nucleus; GO:0003677,DNA binding; GO:0006355,regulation of transcription, DNA-templated; GO:0006351,transcription, DNA-templated	B3 DNA binding domain
g33858	Others	TR	Others	418	122	-1.771	down	LG8	26080791	26084848	+	--	--	K14492 two-component response regulator ARR-A family | (RefSeq) ARR15; response regulator 15 (A)	PREDICTED: two-component response regulator ARR6-like [Ipomoea nil]	RecName: Full=Two-component response regulator ARR15;	SubName: Full=two-component response regulator ARR6-like isoform X1 {ECO:0000313|RefSeq:XP_016449703.1};	GATA-4/5/6 transcription factors	GO:0005737,cytoplasm; GO:0005634,nucleus; GO:0000156,phosphorelay response regulator activity; GO:0009736,cytokinin-activated signaling pathway; GO:0006355,regulation of transcription, DNA-templated; GO:0009735,response to cytokinin; GO:0006351,transcription, DNA-templated	Response regulator receiver domain
g33906	MYB-related	TF	MYB->MYB-related	1241	461	-1.428	down	LG8	26511196	26513108	+	--	--	K12134 circadian clock associated 1 | (RefSeq) CCA1; circadian clock associated 1 (A)	PREDICTED: protein LHY isoform X1 [Solanum tuberosum]	RecName: Full=Protein CCA1 {ECO:0000303|PubMed:9144958}; AltName: Full=MYB-related transcription factor CCA1 {ECO:0000303|PubMed:9144958}; AltName: Full=Protein CIRCADIAN CLOCK ASSOCIATED 1 {ECO:0000303|PubMed:9144958};	SubName: Full=Uncharacterized protein {ECO:0000313|EnsemblPlants:PGSC0003DMT400029394};	Zuotin and related molecular chaperones (DnaJ superfamily), contains DNA-binding domains	GO:0005634,nucleus; GO:0003677,DNA binding; GO:0003700,DNA-binding transcription factor activity; GO:0043565,sequence-specific DNA binding; GO:0007623,circadian rhythm; GO:0048574,long-day photoperiodism, flowering; GO:0042754,negative regulation of circadian rhythm; GO:0045892,negative regulation of transcription, DNA-templated; GO:0045893,positive regulation of transcription, DNA-templated; GO:…	Myb DNA-binding like
g34207	bHLH	TF	bHLH	32	0	-7.587	down	LG9	1372897	1375339	-	--	--	K13422 transcription factor MYC2 | (RefSeq) MYC2; Basic helix-loop-helix (bHLH) DNA-binding family protein (A)	PREDICTED: transcription factor bHLH18-like [Ipomoea nil]	RecName: Full=Transcription factor bHLH25; AltName: Full=Basic helix-loop-helix protein 25; Short=AtbHLH25; Short=bHLH 25; AltName: Full=Transcription factor EN 29; AltName: Full=bHLH transcription factor bHLH025;	SubName: Full=transcription factor bHLH18-like {ECO:0000313|RefSeq:XP_009779237.1};	--	GO:0005634,nucleus; GO:0003677,DNA binding; GO:0003700,DNA-binding transcription factor activity; GO:0046983,protein dimerization activity; GO:0006355,regulation of transcription, DNA-templated; GO:0006351,transcription, DNA-templated	Helix-loop-helix DNA-binding domain
g34515	C2C2-Dof	TF	C2C2->C2C2-Dof	850	305	-1.481	down	LG9	3115271	3116800	-	--	--	K16222 Dof zinc finger protein DOF5.5 | (RefSeq) CDF1; cycling DOF factor 1 (A)	PREDICTED: dof zinc finger protein MNB1A-like isoform X1 [Ipomoea nil]	RecName: Full=Dof zinc finger protein DOF5.8; Short=AtDOF5.8;	SubName: Full=dof zinc finger protein PBF-like {ECO:0000313|RefSeq:XP_016445863.1};	--	GO:0005634,nucleus; GO:0003700,DNA-binding transcription factor activity; GO:0046872,metal ion binding; GO:0000976,transcription regulatory region sequence-specific DNA binding; GO:0006355,regulation of transcription, DNA-templated; GO:0006351,transcription, DNA-templated	Dof domain, zinc finger
g34536	SBP	TF	SBP	2702	1075	-1.33	down	LG9	3291787	3293201	+	--	--	--	PREDICTED: squamosa promoter-binding protein 1 [Ipomoea nil]	RecName: Full=Squamosa promoter-binding protein 1;	RecName: Full=Squamosa promoter-binding-like protein {ECO:0000256|PIRNR:PIRNR037575};	--	GO:0005634,nucleus; GO:0003677,DNA binding; GO:0003700,DNA-binding transcription factor activity; GO:0046872,metal ion binding; GO:0009908,flower development; GO:0006351,transcription, DNA-templated	SBP domain
g34688	WRKY	TF	WRKY	92	219	1.258	up	LG9	4266400	4268123	+	--	--	K13425 WRKY transcription factor 22 | (RefSeq) WRKY22; WRKY family transcription factor (A)	PREDICTED: probable WRKY transcription factor 65 [Ipomoea nil]	RecName: Full=Probable WRKY transcription factor 65; AltName: Full=WRKY DNA-binding protein 65;	SubName: Full=probable WRKY transcription factor 65 isoform X1 {ECO:0000313|RefSeq:XP_009758490.1};	--	GO:0005634,nucleus; GO:0003700,DNA-binding transcription factor activity; GO:0043565,sequence-specific DNA binding; GO:0006351,transcription, DNA-templated	WRKY DNA -binding domain
g34924	NF-YA	TF	NF-Y->NF-YA	100	36	-1.452	down	LG9	6055173	6059742	+	--	--	K08064 nuclear transcription factor Y, alpha | (RefSeq) NF-YA7; nuclear factor Y, subunit A7 (A)	PREDICTED: nuclear transcription factor Y subunit A-7-like [Ipomoea nil]	RecName: Full=Nuclear transcription factor Y subunit A-7; Short=AtNF-YA-7;	--	CCAAT-binding factor, subunit B (HAP2)	GO:0005634,nucleus; GO:0003677,DNA binding; GO:0003700,DNA-binding transcription factor activity; GO:0045892,negative regulation of transcription, DNA-templated; GO:0006351,transcription, DNA-templated	CCAAT-binding transcription factor (CBF-B/NF-YA) subunit B
g35099	HMG	TR	HMG	73	14	-2.342	down	LG9	7375429	7378110	-	--	--	K09273 upstream-binding transcription factor | (RefSeq) 3xHMG-box1; HMG (high mobility group) box protein (A)	--	RecName: Full=High mobility group B protein 13; AltName: Full=Nucleosome/chromatin assembly factor group D 13;	--	HMG box-containing protein	GO:0005634,nucleus; GO:0003677,DNA binding; GO:0003700,DNA-binding transcription factor activity	CHDNT (NUC034) domain
g35139	AP2/ERF-ERF	TF	AP2/ERF->AP2/ERF-ERF	80	22	-1.862	down	LG9	7625074	7626901	-	--	--	K09286 EREBP-like factor | (RefSeq) ERF10; ERF domain protein 10 (A)	--	RecName: Full=Ethylene-responsive transcription factor CRF4; AltName: Full=Protein CYTOKININ RESPONSE FACTOR 4;	--	--	GO:0005737,cytoplasm; GO:0005634,nucleus; GO:0003677,DNA binding; GO:0003700,DNA-binding transcription factor activity; GO:0009736,cytokinin-activated signaling pathway; GO:0009873,ethylene-activated signaling pathway; GO:0048366,leaf development; GO:0006351,transcription, DNA-templated	AP2 domain
g35249	AP2/ERF-ERF	TF	AP2/ERF->AP2/ERF-ERF	178	32	-2.466	down	LG9	8463752	8468216	-	--	--	K09286 EREBP-like factor | (RefSeq) DREB2B; DRE/CRT-binding protein 2B (A)	--	RecName: Full=Ethylene-responsive transcription factor ERF003;	--	--	GO:0005634,nucleus; GO:0003677,DNA binding; GO:0003700,DNA-binding transcription factor activity; GO:0009873,ethylene-activated signaling pathway; GO:0006351,transcription, DNA-templated	AP2 domain
g37107	C3H	TF	C3H	178	360	1.017	up	LG9	22925038	22928011	+	--	--	K14404 cleavage and polyadenylation specificity factor subunit 4 | (RefSeq) CPSF30; cleavage and polyadenylation specificity factor 30 (A)	--	RecName: Full=30-kDa cleavage and polyadenylation specificity factor 30 {ECO:0000303|PubMed:18479511}; EC=3.1.21.- {ECO:0000269|PubMed:17576667}; AltName: Full=Protein OXIDATIVE STRESS TOLERANT 6 {ECO:0000303|PubMed:18545667}; AltName: Full=Zinc finger CCCH domain-containing protein 11; Short=AtC3H11;	--	Polyadenylation factor I complex, subunit, Yth1 (CPSF subunit)	GO:0005737,cytoplasm; GO:0005847,mRNA cleavage and polyadenylation specificity factor complex; GO:0005634,nucleus; GO:0005516,calmodulin binding; GO:0003677,DNA binding; GO:0004519,endonuclease activity; GO:0004521,endoribonuclease activity; GO:0046872,metal ion binding; GO:0003729,mRNA binding; GO:0003723,RNA binding; GO:0031124,mRNA 3'-end processing; GO:0006378,mRNA polyadenylation; GO:0009626…	CCCH-type zinc finger
g37707	C2C2-Dof	TF	C2C2->C2C2-Dof	38	105	1.445	up	LG9	27992686	27997945	-	--	--	K16222 Dof zinc finger protein DOF5.5 | (RefSeq) CDF1; cycling DOF factor 1 (A)	PREDICTED: cyclic dof factor 4 [Ipomoea nil]	RecName: Full=Dof zinc finger protein DOF1.5; Short=AtDOF1.5;	SubName: Full=Uncharacterized protein {ECO:0000313|EMBL:PIN13043.1};	--	GO:0005634,nucleus; GO:0003700,DNA-binding transcription factor activity; GO:0046872,metal ion binding; GO:0044212,transcription regulatory region DNA binding; GO:0006355,regulation of transcription, DNA-templated; GO:0010214,seed coat development; GO:0006351,transcription, DNA-templated	Dof domain, zinc finger
g38281	AP2/ERF-ERF	TF	AP2/ERF->AP2/ERF-ERF	75	30	-1.323	down	LG10	812068	812968	-	--	--	K09286 EREBP-like factor | (RefSeq) tny; Integrase-type DNA-binding superfamily protein (A)	PREDICTED: ethylene-responsive transcription factor ERF038-like [Ipomoea nil]	RecName: Full=Ethylene-responsive transcription factor TINY;	SubName: Full=ethylene-responsive transcription factor ERF034-like {ECO:0000313|RefSeq:XP_018816034.1};	--	GO:0005634,nucleus; GO:0003677,DNA binding; GO:0003700,DNA-binding transcription factor activity; GO:0006351,transcription, DNA-templated	AP2 domain
g38373	Jumonji	TR	Jumonji	187	77	-1.287	down	LG10	1488016	1494547	+	--	--	K11446 histone demethylase JARID1 [EC:1.14.11.-] | (RefSeq) PKDM7D; Transcription factor jumonji (jmj) family protein / zinc finger (C5HC2 type) family protein (A)	PREDICTED: lysine-specific demethylase JMJ706-like isoform X1 [Ipomoea nil]	RecName: Full=Lysine-specific demethylase JMJ706; EC=1.14.11.-; AltName: Full=Jumonji domain-containing protein 706; AltName: Full=Lysine-specific histone demethylase JMJ706; AltName: Full=Protein JUMONJI 706;	SubName: Full=Lysine-specific demethylase {ECO:0000313|EMBL:PHT58609.1}; Flags: Fragment;	DNA-binding protein jumonji/RBP2/SMCY, contains JmjC domain	GO:0000792,heterochromatin; GO:0005634,nucleus; GO:0051213,dioxygenase activity; GO:0032454,histone demethylase activity (H3-K9 specific); GO:0046872,metal ion binding; GO:0048439,flower morphogenesis; GO:0045815,positive regulation of gene expression, epigenetic; GO:0006355,regulation of transcription, DNA-templated; GO:0006351,transcription, DNA-templated	C5HC2 zinc finger
g38398	GRF	TF	GRF	63	238	1.903	up	LG10	1627836	1631426	+	--	--	--	PREDICTED: growth-regulating factor 4-like [Ipomoea nil]	RecName: Full=Growth-regulating factor 4; Short=OsGRF4; AltName: Full=Transcription activator GRF4;	SubName: Full=Uncharacterized protein {ECO:0000313|EnsemblPlants:Solyc08g075950.1.1};	--	GO:0005634,nucleus; GO:0005524,ATP binding; GO:0032502,developmental process; GO:0006355,regulation of transcription, DNA-templated; GO:0006351,transcription, DNA-templated	QLQ
g38574	E2F-DP	TF	E2F-DP	52	143	1.455	up	LG10	2765678	2769066	+	--	--	K06620 transcription factor E2F3 | (RefSeq) ATE2F2; winged-helix DNA-binding transcription factor family protein (A)	PREDICTED: transcription factor E2FC-like [Ipomoea nil]	RecName: Full=Transcription factor E2FC; AltName: Full=E2F transcription factor-2; Short=AtE2F2;	SubName: Full=transcription factor E2FC-like {ECO:0000313|RefSeq:XP_009783024.1};	Transcription factor E2F/dimerization partner (TDP)	GO:0005737,cytoplasm; GO:0005730,nucleolus; GO:0005634,nucleus; GO:0005667,transcription factor complex; GO:0003677,DNA binding; GO:0003700,DNA-binding transcription factor activity; GO:0046982,protein heterodimerization activity; GO:0043565,sequence-specific DNA binding; GO:0044212,transcription regulatory region DNA binding; GO:0051301,cell division; GO:0000902,cell morphogenesis; GO:0042023,DN…	E2F/DP family winged-helix DNA-binding domain
g38705	WRKY	TF	WRKY	404	122	-1.724	down	LG10	3639971	3642130	-	--	--	K13425 WRKY transcription factor 22 | (RefSeq) WRKY22; WRKY family transcription factor (A)	--	RecName: Full=Probable WRKY transcription factor 7; AltName: Full=WRKY DNA-binding protein 7;	SubName: Full=probable WRKY transcription factor 7 {ECO:0000313|RefSeq:XP_016499499.1};	--	GO:0005634,nucleus; GO:0005516,calmodulin binding; GO:0003700,DNA-binding transcription factor activity; GO:0043565,sequence-specific DNA binding; GO:0006351,transcription, DNA-templated	Plant zinc cluster domain
g38746	C2H2	TF	C2H2	263	65	-2.022	down	LG10	3898518	3899432	-	--	--	--	--	RecName: Full=Zinc finger protein ZAT10; AltName: Full=Salt-tolerance zinc finger;	SubName: Full=Zinc finger DNA-binding protein {ECO:0000313|EMBL:CAF74935.1};	FOG: Zn-finger	GO:0005634,nucleus; GO:0003700,DNA-binding transcription factor activity; GO:0046872,metal ion binding; GO:0043565,sequence-specific DNA binding; GO:0035264,multicellular organism growth; GO:0045892,negative regulation of transcription, DNA-templated; GO:0010117,photoprotection; GO:0015979,photosynthesis; GO:0009737,response to abscisic acid; GO:0010200,response to chitin; GO:0009409,response to …	Zinc finger, C2H2 type
g38774	GRF	TF	GRF	12	56	2.17	up	LG10	4141142	4145521	-	--	--	--	--	RecName: Full=Growth-regulating factor 6; Short=OsGRF6; AltName: Full=Transcription activator GRF6;	SubName: Full=Uncharacterized protein {ECO:0000313|EMBL:PHU20646.1};	--	GO:0005634,nucleus; GO:0005524,ATP binding; GO:0032502,developmental process; GO:0006355,regulation of transcription, DNA-templated; GO:0006351,transcription, DNA-templated	QLQ
g38779	AP2/ERF-AP2	TF	AP2/ERF->AP2/ERF-AP2	898	307	-1.548	down	LG10	4197461	4200982	+	--	--	K09285 AP2-like factor, ANT lineage | (RefSeq) ANT; Integrase-type DNA-binding superfamily protein (A)	--	RecName: Full=AP2-like ethylene-responsive transcription factor ANT; AltName: Full=Complementing a protein kinase C mutant protein 1; AltName: Full=Protein AINTEGUMENTA; AltName: Full=Protein DRAGON; AltName: Full=Protein OVULE MUTANT;	SubName: Full=Integrase-type DNA-binding superfamily protein {ECO:0000313|EMBL:EOY15653.1};	--	GO:0005634,nucleus; GO:0003677,DNA binding; GO:0003700,DNA-binding transcription factor activity; GO:0043565,sequence-specific DNA binding; GO:0030154,cell differentiation; GO:0009908,flower development; GO:0019760,glucosinolate metabolic process; GO:0010492,maintenance of shoot apical meristem identity; GO:0042127,regulation of cell proliferation; GO:0006351,transcription, DNA-templated	AP2 domain
g38945	HB-HD-ZIP	TF	HB->HB-HD-ZIP	896	372	-1.266	down	LG10	5391261	5395793	+	--	--	K09338 homeobox-leucine zipper protein | (RefSeq) HAT22; Homeobox-leucine zipper protein family (A)	--	RecName: Full=Homeobox-leucine zipper protein HAT22; AltName: Full=Homeodomain-leucine zipper protein HAT22; Short=HD-ZIP protein 22;	SubName: Full=homeobox-leucine zipper protein HAT22-like {ECO:0000313|RefSeq:XP_016483184.1};	Transcription factor HEX, contains HOX and HALZ domains	GO:0005634,nucleus; GO:0003700,DNA-binding transcription factor activity; GO:0043565,sequence-specific DNA binding; GO:0009738,abscisic acid-activated signaling pathway; GO:0009737,response to abscisic acid; GO:0009735,response to cytokinin; GO:0009414,response to water deprivation; GO:0006351,transcription, DNA-templated	Protein SOGA
g38977	MYB-related	TF	MYB->MYB-related	196	394	1.01	up	LG10	5696416	5701797	+	--	--	--	--	--	SubName: Full=uncharacterized protein LOC107815624 {ECO:0000313|RefSeq:XP_016496725.1};	--	GO:0003677,DNA binding	Myb-like DNA-binding domain
g39202	MYB	TF	MYB->MYB	24	4	-2.581	down	LG10	7307905	7315330	+	--	--	K09422 transcription factor MYB, plant | (RefSeq) MYB67; myb domain protein 67 (A)	PREDICTED: myb-related protein 308-like [Ipomoea nil]	RecName: Full=Transcription factor MYB86; AltName: Full=Myb homolog 4; Short=AtMyb4; AltName: Full=Myb-related protein 86; Short=AtMYB86;	SubName: Full=Transcription factor MYB26 {ECO:0000313|EMBL:PHT35819.1};	Transcription factor, Myb superfamily	GO:0005634,nucleus; GO:0000981,DNA-binding transcription factor activity, RNA polymerase II-specific; GO:0043565,sequence-specific DNA binding; GO:0001135,RNA polymerase II transcription regulator recruiting activity; GO:0044212,transcription regulatory region DNA binding; GO:0030154,cell differentiation; GO:0006357,regulation of transcription by RNA polymerase II; GO:0006351,transcription, DNA-t…	Myb-like DNA-binding domain
g3935	Others	TR	Others	409	184	-1.157	down	LG1	28453388	28459311	+	--	--	K00006 glycerol-3-phosphate dehydrogenase (NAD+) [EC:1.1.1.8] | (RefSeq) GLY1; NAD-dependent glycerol-3-phosphate dehydrogenase family protein (A)	PREDICTED: glycerol-3-phosphate dehydrogenase [NAD(+)]	RecName: Full=Glycerol-3-phosphate dehydrogenase [NAD(+)] 2, chloroplastic; EC=1.1.1.8; AltName: Full=Protein SUPPRESSOR OF FATTY ACID DESATURASE DEFICIENCY 1; Flags: Precursor;	RecName: Full=Glycerol-3-phosphate dehydrogenase [NAD(+)] {ECO:0000256|RuleBase:RU361243}; EC=1.1.1.8 {ECO:0000256|RuleBase:RU361243};	Glycerol-3-phosphate dehydrogenase/dihydroxyacetone 3-phosphate reductase	GO:0009941,chloroplast envelope; GO:0009331,glycerol-3-phosphate dehydrogenase complex; GO:0004367,glycerol-3-phosphate dehydrogenase [NAD+] activity; GO:0051287,NAD binding; GO:0005975,carbohydrate metabolic process; GO:0046168,glycerol-3-phosphate catabolic process; GO:0045017,glycerolipid biosynthetic process; GO:0046486,glycerolipid metabolic process; GO:0006650,glycerophospholipid metabolic …	NAD-dependent glycerol-3-phosphate dehydrogenase N-terminus
g397	C2C2-GATA	TF	C2C2->C2C2-GATA	412	104	-1.991	down	LG1	2151663	2155079	+	--	--	--	PREDICTED: GATA transcription factor 5-like isoform X2 [Ipomoea nil]	RecName: Full=GATA transcription factor 6;	SubName: Full=Uncharacterized protein {ECO:0000313|EnsemblPlants:PGSC0003DMT400009117};	GATA-4/5/6 transcription factors	GO:0005634,nucleus; GO:0005667,transcription factor complex; GO:0003682,chromatin binding; GO:0003700,DNA-binding transcription factor activity; GO:0000977,RNA polymerase II regulatory region sequence-specific DNA binding; GO:0001085,RNA polymerase II transcription factor binding; GO:0001228,DNA-binding transcription activator activity, RNA polymerase II-specific; GO:0008270,zinc ion binding; GO:…	Sporozoite P67 surface antigen
g4006	MYB	TF	MYB->MYB	451	153	-1.559	down	LG1	28881809	28883772	-	--	--	K09422 transcription factor MYB, plant | (RefSeq) MYB6; myb domain protein 6 (A)	PREDICTED: transcription repressor MYB6-like [Ipomoea nil]	RecName: Full=Myb-related protein 330;	SubName: Full=myb-related protein 330-like {ECO:0000313|RefSeq:XP_009767902.1};	Transcription factor, Myb superfamily	GO:0005634,nucleus; GO:0003677,DNA binding; GO:0006355,regulation of transcription, DNA-templated; GO:0006351,transcription, DNA-templated	Myb-like DNA-binding domain
g4106	SBP	TF	SBP	1661	720	-1.205	down	LG1	29547585	29551830	-	--	--	--	--	RecName: Full=Squamosa promoter-binding-like protein 12;	--	--	GO:0005634,nucleus; GO:0003677,DNA binding; GO:0046872,metal ion binding; GO:0006355,regulation of transcription, DNA-templated; GO:0006351,transcription, DNA-templated	SBP domain
g41255	HB-HD-ZIP	TF	HB->HB-HD-ZIP	50	18	-1.492	down	LG10	23002580	23008704	+	--	--	K09338 homeobox-leucine zipper protein | (RefSeq) ATHB13; Homeobox-leucine zipper protein family (A)	PREDICTED: homeobox-leucine zipper protein ATHB-13-like [Ipomoea nil]	RecName: Full=Homeobox-leucine zipper protein ATHB-13; AltName: Full=HD-ZIP protein ATHB-13; AltName: Full=Homeodomain transcription factor ATHB-13;	SubName: Full=Uncharacterized protein {ECO:0000313|EMBL:OAY61429.1};	Transcription factor HEX, contains HOX and HALZ domains	GO:0005634,nucleus; GO:0003700,DNA-binding transcription factor activity; GO:0043565,sequence-specific DNA binding; GO:0048826,cotyledon morphogenesis; GO:0009965,leaf morphogenesis; GO:0080022,primary root development; GO:0009744,response to sucrose; GO:0006351,transcription, DNA-templated	Septum formation initiator
g41745	SRS	TF	SRS	253	117	-1.118	down	LG11	2465819	2467607	+	--	--	--	PREDICTED: protein SHI RELATED SEQUENCE 1-like [Ipomoea nil]	RecName: Full=Protein SHI RELATED SEQUENCE 5;	SubName: Full=protein SHI RELATED SEQUENCE 1-like isoform X1 {ECO:0000313|RefSeq:XP_016486392.1};	--	GO:0005634,nucleus; GO:0003677,DNA binding; GO:0046872,metal ion binding; GO:0009851,auxin biosynthetic process; GO:0009734,auxin-activated signaling pathway; GO:0007275,multicellular organism development	Domain of unknown function (DUF702)
g41847	C2C2-Dof	TF	C2C2->C2C2-Dof	39	10	-1.961	down	LG11	2998055	2999432	+	--	--	K16222 Dof zinc finger protein DOF5.5 | (RefSeq) CDF1; cycling DOF factor 1 (A)	PREDICTED: dof zinc finger protein DOF3.4-like [Ipomoea nil]	RecName: Full=Dof zinc finger protein MNB1A;	SubName: Full=dof zinc finger protein DOF3.4-like {ECO:0000313|RefSeq:XP_016571456.1};	--	GO:0005634,nucleus; GO:0003677,DNA binding; GO:0003700,DNA-binding transcription factor activity; GO:0044212,transcription regulatory region DNA binding; GO:0008270,zinc ion binding; GO:0006355,regulation of transcription, DNA-templated; GO:0006351,transcription, DNA-templated	--
g41863	MYB	TF	MYB->MYB	162	27	-2.609	down	LG11	3087026	3088020	-	--	--	K09422 transcription factor MYB, plant | (RefSeq) MYB73; myb domain protein 73 (A)	PREDICTED: transcription factor MYB44-like [Ipomoea nil]	RecName: Full=Transcription factor MYB73 {ECO:0000303|PubMed:11597504}; AltName: Full=Myb-related protein 73 {ECO:0000303|PubMed:11597504}; Short=AtMYB73 {ECO:0000303|PubMed:11597504};	SubName: Full=Transcription factor myb44 {ECO:0000313|EMBL:OIT22171.1};	Transcription factor, Myb superfamily	GO:0005634,nucleus; GO:0003700,DNA-binding transcription factor activity; GO:0000981,DNA-binding transcription factor activity, RNA polymerase II-specific; GO:0043565,sequence-specific DNA binding; GO:0001135,RNA polymerase II transcription regulator recruiting activity; GO:0044212,transcription regulatory region DNA binding; GO:0030154,cell differentiation; GO:0019760,glucosinolate metabolic pro…	Myb DNA-binding like
g41880	B3	TF	B3->B3	64	7	-3.249	down	LG11	3220192	3223334	+	--	--	--	PREDICTED: B3 domain-containing protein At3g19184-like isoform X2 [Ipomoea nil]	RecName: Full=B3 domain-containing protein Os06g0194400;	SubName: Full=B3 domain-containing protein At5g42700-like {ECO:0000313|RefSeq:XP_009783454.1};	--	GO:0005634,nucleus; GO:0003677,DNA binding; GO:0006355,regulation of transcription, DNA-templated; GO:0006351,transcription, DNA-templated	B3 DNA binding domain
g41892	HSF	TF	HSF	87	35	-1.309	down	LG11	3276088	3277787	-	--	--	K09419 heat shock transcription factor, other eukaryote | (RefSeq) HSFB4; heat shock transcription factor B4 (A)	Heat stress transcription factor B-4 [Cajanus cajan]	RecName: Full=Heat stress transcription factor B-4; Short=AtHsfB4; AltName: Full=AtHsf-02;	SubName: Full=Heat stress transcription factor B-4 {ECO:0000313|EMBL:KYP42250.1};	Heat shock transcription factor	GO:0005737,cytoplasm; GO:0005634,nucleus; GO:0003700,DNA-binding transcription factor activity; GO:0043565,sequence-specific DNA binding; GO:0008356,asymmetric cell division; GO:0006351,transcription, DNA-templated	HSF-type DNA-binding
g41900	HB-WOX	TF	HB->HB-WOX	127	33	-1.956	down	LG11	3341712	3342997	-	--	--	--	PREDICTED: WUSCHEL-related homeobox 4-like isoform X2 [Ipomoea nil]	RecName: Full=WUSCHEL-related homeobox 4;	SubName: Full=WUSCHEL-related homeobox 4 {ECO:0000313|RefSeq:XP_009776871.1};	--	GO:0005634,nucleus; GO:0003677,DNA binding; GO:0051301,cell division; GO:0010087,phloem or xylem histogenesis; GO:0010067,procambium histogenesis; GO:0006355,regulation of transcription, DNA-templated; GO:0007165,signal transduction; GO:0006351,transcription, DNA-templated	Homeodomain
g41910	WRKY	TF	WRKY	1124	244	-2.206	down	LG11	3416624	3418408	-	--	--	K13425 WRKY transcription factor 22 | (RefSeq) WRKY22; WRKY family transcription factor (A)	WRKY1 [Ipomoea batatas]	RecName: Full=Probable WRKY transcription factor 7; AltName: Full=WRKY DNA-binding protein 7;	SubName: Full=WRKY1 {ECO:0000313|EMBL:ACT55331.1};	--	GO:0005634,nucleus; GO:0005516,calmodulin binding; GO:0003700,DNA-binding transcription factor activity; GO:0043565,sequence-specific DNA binding; GO:0006351,transcription, DNA-templated	Plant zinc cluster domain
g41923	MYB	TF	MYB->MYB	149	380	1.349	up	LG11	3484613	3485753	+	--	--	K09422 transcription factor MYB, plant | (RefSeq) MYB70; myb domain protein 70 (A)	PREDICTED: transcription factor MYB44-like [Ipomoea nil]	RecName: Full=Transcription factor MYB73 {ECO:0000303|PubMed:11597504}; AltName: Full=Myb-related protein 73 {ECO:0000303|PubMed:11597504}; Short=AtMYB73 {ECO:0000303|PubMed:11597504};	SubName: Full=MYB family protein {ECO:0000313|EMBL:AIT52202.1};	Transcription factor, Myb superfamily	GO:0005634,nucleus; GO:0003700,DNA-binding transcription factor activity; GO:0000981,DNA-binding transcription factor activity, RNA polymerase II-specific; GO:0043565,sequence-specific DNA binding; GO:0001135,RNA polymerase II transcription regulator recruiting activity; GO:0044212,transcription regulatory region DNA binding; GO:0030154,cell differentiation; GO:0019760,glucosinolate metabolic pro…	SLIDE
g41944	LOB	TF	LOB	3055	601	-2.346	down	LG11	3579351	3580312	-	--	--	K13944 LOB domain-containing protein 16 | (RefSeq) LBD16; lateral organ boundaries-domain 16 (A)	PREDICTED: LOB domain-containing protein 39-like [Ipomoea nil]	RecName: Full=LOB domain-containing protein 39; AltName: Full=ASYMMETRIC LEAVES 2-like protein 41; Short=AS2-like protein 41;	SubName: Full=LOB domain-containing protein 38-like isoform X1 {ECO:0000313|RefSeq:XP_009783238.1};	--	--	Lateral organ boundaries (LOB) domain
g41970	bHLH	TF	bHLH	733	212	-1.789	down	LG11	3749409	3752092	+	--	--	K12126 phytochrome-interacting factor 3 | (RefSeq) PIF3; phytochrome interacting factor 3 (A)	PREDICTED: transcription factor bHLH74-like isoform X1 [Ipomoea nil]	RecName: Full=Transcription factor bHLH74; AltName: Full=Basic helix-loop-helix protein 74; Short=AtbHLH74; Short=bHLH 74; AltName: Full=Protein ACTIVATOR FOR CELL ELONGATION 2; AltName: Full=Transcription factor EN 90; AltName: Full=bHLH transcription factor bHLH074;	SubName: Full=transcription factor bHLH74-like isoform X1 {ECO:0000313|RefSeq:XP_016489484.1, ECO:0000313|RefSeq:XP_016489485.1, ECO:0000313|RefSeq:XP_016489486.1};	--	GO:0005634,nucleus; GO:0003677,DNA binding; GO:0003700,DNA-binding transcription factor activity; GO:0046983,protein dimerization activity; GO:0040008,regulation of growth; GO:0006355,regulation of transcription, DNA-templated; GO:0009637,response to blue light; GO:0006351,transcription, DNA-templated	Helix-loop-helix DNA-binding domain
g42000	AUX/IAA	TR	AUX/IAA	7256	3366	-1.108	down	LG11	3987794	3991826	-	--	--	K14484 auxin-responsive protein IAA | (RefSeq) IAA9; indole-3-acetic acid inducible 9 (A)	PREDICTED: auxin-responsive protein IAA8-like isoform X2 [Ipomoea nil]	RecName: Full=Auxin-responsive protein IAA9; AltName: Full=Indoleacetic acid-induced protein 9;	RecName: Full=Auxin-responsive protein {ECO:0000256|RuleBase:RU004549};	--	GO:0005634,nucleus; GO:0003700,DNA-binding transcription factor activity; GO:0043565,sequence-specific DNA binding; GO:0009734,auxin-activated signaling pathway; GO:0009733,response to auxin; GO:0006351,transcription, DNA-templated	AUX/IAA family
g42002	bHLH	TF	bHLH	2065	881	-1.23	down	LG11	4008065	4010036	-	--	--	K13422 transcription factor MYC2 | (RefSeq) MYC2; Basic helix-loop-helix (bHLH) DNA-binding family protein (A)	PREDICTED: transcription factor bHLH93-like [Ipomoea nil]	RecName: Full=Transcription factor bHLH93; AltName: Full=Basic helix-loop-helix protein 93; Short=AtbHLH93; Short=bHLH 93; AltName: Full=Transcription factor EN 47; AltName: Full=bHLH transcription factor bHLH093;	SubName: Full=transcription factor bHLH93-like {ECO:0000313|RefSeq:XP_016490472.1};	--	GO:0005634,nucleus; GO:0003677,DNA binding; GO:0003700,DNA-binding transcription factor activity; GO:0046983,protein dimerization activity; GO:0045487,gibberellin catabolic process; GO:0007275,multicellular organism development; GO:0010371,regulation of gibberellin biosynthetic process; GO:0006351,transcription, DNA-templated	Helix-loop-helix DNA-binding domain
g42120	AP2/ERF-ERF	TF	AP2/ERF->AP2/ERF-ERF	106	37	-1.529	down	LG11	4796934	4800644	+	--	--	K09286 EREBP-like factor | (RefSeq) RAP2.4; related to AP2 4 (A)	PREDICTED: ethylene-responsive transcription factor RAP2-13-like [Ipomoea nil]	RecName: Full=Ethylene-responsive transcription factor RAP2-4; AltName: Full=Ethylene-responsive transcription factor ERF059; AltName: Full=Protein RELATED TO APETALA2 4;	SubName: Full=ERF transcription factor 01 {ECO:0000313|EMBL:AHB33872.1};	--	GO:0005634,nucleus; GO:0003677,DNA binding; GO:0003700,DNA-binding transcription factor activity; GO:0043565,sequence-specific DNA binding; GO:0071472,cellular response to salt stress; GO:0009736,cytokinin-activated signaling pathway; GO:0009873,ethylene-activated signaling pathway; GO:0045595,regulation of cell differentiation; GO:0009409,response to cold; GO:0009416,response to light stimulus; …	AP2 domain
g42209	HMG	TR	HMG	113	46	-1.311	down	LG11	5341712	5343856	-	--	--	K10802 high mobility group protein B1 | (RefSeq) HMGB1; high mobility group B1 (A)	--	RecName: Full=High mobility group B protein 7; AltName: Full=Nucleosome/chromatin assembly factor group D 07; Short=Nucleosome/chromatin assembly factor group D 7; AltName: Full=Protein NUCLEAR FUSION DEFECTIVE 7 {ECO:0000303|PubMed:16698901};	SubName: Full=High mobility group b protein 7 {ECO:0000313|EMBL:OIT00729.1};	HMG box-containing protein	GO:0005634,nucleus; GO:0003677,DNA binding; GO:0003700,DNA-binding transcription factor activity; GO:0000741,karyogamy; GO:0010197,polar nucleus fusion	HMG-box domain
g42238	C2C2-Dof	TF	C2C2->C2C2-Dof	60	131	1.122	up	LG11	5562623	5563744	+	--	--	K16222 Dof zinc finger protein DOF5.5 | (RefSeq) CDF1; cycling DOF factor 1 (A)	--	RecName: Full=Dof zinc finger protein DOF3.5; Short=AtDOF3.5;	SubName: Full=Uncharacterized protein {ECO:0000313|EMBL:CDP18281.1};	--	GO:0005634,nucleus; GO:0003677,DNA binding; GO:0003700,DNA-binding transcription factor activity; GO:0046872,metal ion binding; GO:0006355,regulation of transcription, DNA-templated; GO:0006351,transcription, DNA-templated	Dof domain, zinc finger
g42286	C3H	TF	C3H	1104	2342	1.085	up	LG11	6040063	6053531	+	--	--	--	--	RecName: Full=Zinc finger CCCH domain-containing protein 7; Short=AtC3H7; EC=3.1.-.-; AltName: Full=AtSmicl;	SubName: Full=uncharacterized protein LOC107809023 {ECO:0000313|RefSeq:XP_016489090.1};	C3H1-type Zn-finger protein	GO:0005847,mRNA cleavage and polyadenylation specificity factor complex; GO:0003677,DNA binding; GO:0004521,endoribonuclease activity; GO:0046872,metal ion binding; GO:0003723,RNA binding; GO:0006378,mRNA polyadenylation; GO:0016973,poly(A)+ mRNA export from nucleus	RNA-binding, Nab2-type zinc finger
g42349	Trihelix	TF	Trihelix	527	211	-1.318	down	LG11	6548398	6551212	-	--	--	--	--	--	SubName: Full=Uncharacterized protein {ECO:0000313|EMBL:PIN10551.1};	--	--	Myb/SANT-like DNA-binding domain
g42434	SNF2	TR	SNF2	91	35	-1.359	down	LG11	7117862	7140611	-	--	--	K15505 DNA repair protein RAD5 [EC:3.6.4.-] | (RefSeq) Helicase protein with RING/U-box domain-containing protein (A)	--	RecName: Full=DNA repair protein RAD5B {ECO:0000305}; EC=3.6.4.- {ECO:0000305}; AltName: Full=Putative SWI/SNF-related matrix-associated actin-dependent regulator of chromatin subfamily A member 3-like 3 {ECO:0000305}; Short=SMARCA3-like protein 3 {ECO:0000305}; AltName: Full=RAD5 homolog B {ECO:0000303|PubMed:18310306}; Short=AtRAD5B {ECO:0000303|PubMed:18310306};	SubName: Full=Uncharacterized protein {ECO:0000313|EMBL:PHT91950.1};	Helicase-like transcription factor HLTF/DNA helicase RAD5, DEAD-box superfamily	GO:0009941,chloroplast envelope; GO:0005634,nucleus; GO:0005524,ATP binding; GO:0004386,helicase activity; GO:0003676,nucleic acid binding; GO:0008270,zinc ion binding; GO:0016569,covalent chromatin modification; GO:0006281,DNA repair	DEAD/DEAH box helicase
g42847	MYB	TF	MYB->MYB	88	27	-1.729	down	LG11	9996862	9998237	+	--	--	K09422 transcription factor MYB, plant | (RefSeq) MYB4; myb domain protein 4 (A)	--	RecName: Full=Myb-related protein 308;	--	Transcription factor, Myb superfamily	GO:0005634,nucleus; GO:0003677,DNA binding; GO:0006355,regulation of transcription, DNA-templated; GO:0006351,transcription, DNA-templated	SLIDE
g42953	bHLH	TF	bHLH	192	87	-1.142	down	LG11	10706518	10709255	+	--	--	--	PREDICTED: transcription factor bHLH106-like [Ipomoea nil]	RecName: Full=Transcription factor bHLH106; AltName: Full=Basic helix-loop-helix protein 106; Short=AtbHLH106; Short=bHLH 106; AltName: Full=Transcription factor EN 56; AltName: Full=bHLH transcription factor bHLH106;	SubName: Full=transcription factor bHLH106-like {ECO:0000313|RefSeq:XP_016478079.1};	Aryl-hydrocarbon receptor nuclear translocator	GO:0009941,chloroplast envelope; GO:0005634,nucleus; GO:0003677,DNA binding; GO:0003700,DNA-binding transcription factor activity; GO:0046983,protein dimerization activity; GO:0042538,hyperosmotic salinity response; GO:0006355,regulation of transcription, DNA-templated; GO:0006351,transcription, DNA-templated	Helix-loop-helix DNA-binding domain
g42979	TRAF	TR	TRAF	633	262	-1.272	down	LG11	10946663	10951398	-	--	--	K14508 regulatory protein NPR1 | (RefSeq) BOP2; Ankyrin repeat family protein / BTB/POZ domain-containing protein (A)	PREDICTED: regulatory protein NPR5-like [Ipomoea nil]	RecName: Full=Regulatory protein NPR5; AltName: Full=BTB/POZ domain-containing protein NPR5; AltName: Full=Protein BLADE ON PETIOLE 2;	SubName: Full=Uncharacterized protein {ECO:0000313|EMBL:CDP14213.1};	FOG: Ankyrin repeat	GO:0005737,cytoplasm; GO:0005634,nucleus; GO:0019005,SCF ubiquitin ligase complex; GO:0031625,ubiquitin protein ligase binding; GO:0010434,bract formation; GO:0010582,floral meristem determinacy; GO:0010227,floral organ abscission; GO:0048439,flower morphogenesis; GO:0009864,induced systemic resistance, jasmonic acid mediated signaling pathway; GO:0010254,nectary development; GO:0009944,polarity …	Ankyrin repeat
g43294	LOB	TF	LOB	99	18	-2.483	down	LG11	13130843	13131707	-	--	--	--	PREDICTED: LOB domain-containing protein 38-like [Ipomoea nil]	RecName: Full=LOB domain-containing protein 38; AltName: Full=ASYMMETRIC LEAVES 2-like protein 40; Short=AS2-like protein 40;	SubName: Full=LOB domain-containing protein 39 {ECO:0000313|EMBL:PHT63934.1};	--	--	Lateral organ boundaries (LOB) domain
g43455	PHD	TR	PHD	20	4	-2.465	down	LG11	14237213	14238531	-	--	--	K11380 NuA3 HAT complex component NTO1 | (RefSeq) RING/FYVE/PHD zinc finger superfamily protein (A)	PREDICTED: protein Jade-1 [Ipomoea nil]	RecName: Full=Histone-lysine N-methyltransferase TRX1 {ECO:0000305}; Short=OsTrx1 {ECO:0000303|PubMed:24420930}; EC=2.1.1.43 {ECO:0000269|PubMed:24420930}; AltName: Full=Protein SET DOMAIN GROUP 723 {ECO:0000305}; AltName: Full=SET family protein 33 {ECO:0000305}; Short=OsSET33 {ECO:0000303|PubMed:23762371};	SubName: Full=protein Jade-1 {ECO:0000313|RefSeq:XP_009773229.1};	PHD finger protein BR140/LIN-49	GO:0005634,nucleus; GO:0042054,histone methyltransferase activity; GO:0018024,histone-lysine N-methyltransferase activity; GO:0046872,metal ion binding; GO:0009908,flower development; GO:0035556,intracellular signal transduction; GO:0048578,positive regulation of long-day photoperiodism, flowering	PHD-finger
g4366	B3	TF	B3->B3	378	161	-1.229	down	LG2	1278177	1280380	-	--	--	--	PREDICTED: B3 domain-containing protein At3g19184 [Ipomoea nil]	RecName: Full=B3 domain-containing protein At3g19184;	SubName: Full=B3 domain-containing protein {ECO:0000313|EMBL:PHT63118.1};	--	GO:0005634,nucleus; GO:0003677,DNA binding; GO:0006355,regulation of transcription, DNA-templated; GO:0006351,transcription, DNA-templated	B3 DNA binding domain
g4375	RWP-RK	TF	RWP-RK	49	0	-8.208	down	LG2	1344575	1347153	+	--	--	--	PREDICTED: protein NLP7-like [Ipomoea nil]	RecName: Full=Protein NLP2 {ECO:0000303|PubMed:15785851}; Short=OsNLP2 {ECO:0000303|PubMed:15785851}; AltName: Full=NIN-like protein 2 {ECO:0000303|PubMed:15785851}; AltName: Full=Nodule inception protein-like protein 2 {ECO:0000303|PubMed:15785851};	SubName: Full=uncharacterized protein LOC107781775 {ECO:0000313|RefSeq:XP_016458034.1};	--	GO:0005634,nucleus; GO:0003677,DNA binding; GO:0006355,regulation of transcription, DNA-templated; GO:0006351,transcription, DNA-templated	Helix-turn-helix domain, rpiR family
g43908	AP2/ERF-ERF	TF	AP2/ERF->AP2/ERF-ERF	58	15	-1.943	down	LG11	17626940	17630557	-	--	--	K09286 EREBP-like factor | (RefSeq) ERF7; ethylene response factor 7 (A)	PREDICTED: ethylene-responsive transcription factor ERF003-like [Ipomoea nil]	RecName: Full=Ethylene-responsive transcription factor ERF003;	SubName: Full=Uncharacterized protein {ECO:0000313|EMBL:KCW81332.1};	--	GO:0005634,nucleus; GO:0003677,DNA binding; GO:0003700,DNA-binding transcription factor activity; GO:0009873,ethylene-activated signaling pathway; GO:0006351,transcription, DNA-templated	AP2 domain
g45094	HSF	TF	HSF	211	2870	3.769	up	LG11	27045265	27047443	-	--	--	K09419 heat shock transcription factor, other eukaryote | (RefSeq) HSFA3; heat shock transcription factor A3 (A)	PREDICTED: heat stress transcription factor A-3 isoform X1 [Ipomoea nil]	RecName: Full=Heat stress transcription factor A-3; Short=AtHsfA3; AltName: Full=AtHsf-17;	SubName: Full=Heat shock factor (HSF)-type, DNA-binding protein {ECO:0000313|EMBL:OMO68209.1};	Heat shock transcription factor	GO:0005634,nucleus; GO:0003677,DNA binding; GO:0003700,DNA-binding transcription factor activity; GO:0043565,sequence-specific DNA binding; GO:0006355,regulation of transcription, DNA-templated; GO:0010200,response to chitin; GO:0009408,response to heat; GO:0006351,transcription, DNA-templated	CCDC85 family
g46237	AP2/ERF-ERF	TF	AP2/ERF->AP2/ERF-ERF	218	61	-1.825	down	LG11	36103565	36104307	-	--	--	K14516 ethylene-responsive transcription factor 1 | (RefSeq) ERF1; ethylene response factor 1 (A)	PREDICTED: pathogenesis-related genes transcriptional activator PTI5-like [Ipomoea nil]	RecName: Full=Pathogenesis-related genes transcriptional activator PTI5; AltName: Full=PTO-interacting protein 5;	SubName: Full=ERF3 transcription factor {ECO:0000313|EMBL:ADC94860.1};	--	GO:0005634,nucleus; GO:0003677,DNA binding; GO:0003700,DNA-binding transcription factor activity; GO:0006952,defense response; GO:0006351,transcription, DNA-templated	AP2 domain
g46272	AP2/ERF-ERF	TF	AP2/ERF->AP2/ERF-ERF	846	377	-1.167	down	LG11	36296574	36297539	+	--	--	K09286 EREBP-like factor | (RefSeq) ERF9; erf domain protein 9 (A)	PREDICTED: ethylene-responsive transcription factor 4-like [Ipomoea nil]	RecName: Full=Ethylene-responsive transcription factor 9; Short=AtERF9; AltName: Full=Ethylene-responsive element-binding factor 9; Short=EREBP-9;	SubName: Full=ERF9 {ECO:0000313|EMBL:AMS25577.1}; Flags: Fragment;	--	GO:0016020,membrane; GO:0005634,nucleus; GO:0003700,DNA-binding transcription factor activity; GO:0043565,sequence-specific DNA binding; GO:0006952,defense response; GO:0009873,ethylene-activated signaling pathway; GO:0019760,glucosinolate metabolic process; GO:0006351,transcription, DNA-templated	AP2 domain
g4631	C2H2	TF	C2H2	128	49	-1.392	down	LG2	3077913	3078821	-	--	--	--	putative zinc finger protein [Ipomoea trifida]	RecName: Full=Zinc finger protein ZAT5;	SubName: Full=Putative zinc finger protein {ECO:0000313|EMBL:AAS79571.1};	FOG: Zn-finger	GO:0005634,nucleus; GO:0003700,DNA-binding transcription factor activity; GO:0046872,metal ion binding; GO:0043565,sequence-specific DNA binding; GO:0006355,regulation of transcription, DNA-templated; GO:0006351,transcription, DNA-templated	C2H2-type zinc finger
g46715	MADS-MIKC	TF	MADS->MADS-MIKC	115	446	1.957	up	LG11	39234183	39243211	+	--	--	K09264 MADS-box transcription factor, plant | (RefSeq) AGL44; AGAMOUS-like 44 (A)	--	RecName: Full=Agamous-like MADS-box protein AGL21;	SubName: Full=Uncharacterized protein {ECO:0000313|EMBL:OAY45265.1}; Flags: Fragment;	MADS box transcription factor	GO:0005634,nucleus; GO:0003700,DNA-binding transcription factor activity; GO:0046983,protein dimerization activity; GO:0000977,RNA polymerase II regulatory region sequence-specific DNA binding; GO:0008134,transcription factor binding; GO:0045944,positive regulation of transcription by RNA polymerase II; GO:0006351,transcription, DNA-templated	SRF-type transcription factor (DNA-binding and dimerisation domain)
g47048	bHLH	TF	bHLH	260	17	-3.924	down	LG12	979301	982683	+	--	--	K20558 transcription factor SPEECHLESS | (RefSeq) SPCH; basic helix-loop-helix (bHLH) DNA-binding superfamily protein (A)	PREDICTED: transcription factor bHLH96-like [Ipomoea nil]	RecName: Full=Transcription factor bHLH96; AltName: Full=Basic helix-loop-helix protein 96; Short=AtbHLH96; Short=bHLH 96; AltName: Full=Transcription factor EN 15; AltName: Full=bHLH transcription factor bHLH096;	SubName: Full=transcription factor bHLH94-like {ECO:0000313|RefSeq:XP_009803283.1};	--	GO:0005634,nucleus; GO:0003677,DNA binding; GO:0003700,DNA-binding transcription factor activity; GO:0046983,protein dimerization activity; GO:0006351,transcription, DNA-templated	Helix-loop-helix DNA-binding domain
g47203	HB-HD-ZIP	TF	HB->HB-HD-ZIP	3794	1121	-1.759	down	LG12	2207277	2210328	-	--	--	K09338 homeobox-leucine zipper protein | (RefSeq) HB-1; homeobox 1 (A)	PREDICTED: homeobox-leucine zipper protein HAT5-like [Ipomoea nil]	RecName: Full=Homeobox-leucine zipper protein HAT5; AltName: Full=HD-ZIP protein ATHB-1; AltName: Full=Homeodomain transcription factor ATHB-1; AltName: Full=Homeodomain-leucine zipper protein HAT5; Short=HD-ZIP protein 5;	SubName: Full=Uncharacterized protein {ECO:0000313|EMBL:CDP00280.1};	Transcription factor HEX, contains HOX and HALZ domains	GO:0005634,nucleus; GO:0003700,DNA-binding transcription factor activity; GO:0042803,protein homodimerization activity; GO:0043565,sequence-specific DNA binding; GO:0009965,leaf morphogenesis; GO:0045893,positive regulation of transcription, DNA-templated; GO:0009637,response to blue light; GO:0009651,response to salt stress; GO:0006351,transcription, DNA-templated	Homeobox KN domain
g47274	GARP-G2-like	TF	GARP->GARP-G2-like	125	41	-1.639	down	LG12	2737472	2740454	-	--	--	K14491 two-component response regulator ARR-B family | (RefSeq) RR18; response regulator 18 (A)	PREDICTED: myb family transcription factor PHL8-like isoform X3 [Ipomoea nil]	RecName: Full=Myb family transcription factor PHL8 {ECO:0000305}; AltName: Full=Protein PHR1-LIKE 8 {ECO:0000305};	SubName: Full=MYB11 {ECO:0000313|EMBL:AOQ26231.1};	--	GO:0005634,nucleus; GO:0003677,DNA binding; GO:0003700,DNA-binding transcription factor activity; GO:0006355,regulation of transcription, DNA-templated; GO:0006351,transcription, DNA-templated	Myb-like DNA-binding domain
g47288	NAC	TF	NAC	8	42	2.312	up	LG12	2822396	2823909	-	--	--	--	PREDICTED: NAC transcription factor 29-like [Ipomoea nil]	RecName: Full=NAC transcription factor 29; Short=AtNAC029; AltName: Full=Protein NAC-LIKE, ACTIVATED BY AP3/PI; Short=AtNAP;	SubName: Full=NAC transcription factor 29-like {ECO:0000313|RefSeq:XP_016492232.1};	--	GO:0005634,nucleus; GO:0003677,DNA binding; GO:0003700,DNA-binding transcription factor activity; GO:0009793,embryo development ending in seed dormancy; GO:0009908,flower development; GO:0009835,fruit ripening; GO:0010150,leaf senescence; GO:0009825,multidimensional cell growth; GO:0006351,transcription, DNA-templated	No apical meristem (NAM) protein
g47459	bZIP	TF	bZIP	1349	41	-5.063	down	LG12	4028553	4029362	+	--	--	K09060 plant G-box-binding factor | (RefSeq) bZIP68; basic region/leucine zipper transcription factor 68 (A)	PREDICTED: basic leucine zipper 43-like [Ipomoea nil]	RecName: Full=Basic leucine zipper 43 {ECO:0000303|PubMed:11906833}; Short=AtbZIP43 {ECO:0000303|PubMed:11906833}; Short=bZIP protein 43 {ECO:0000303|PubMed:11906833};	SubName: Full=basic leucine zipper 43-like {ECO:0000313|RefSeq:XP_016500977.1};	--	GO:0005634,nucleus; GO:0003677,DNA binding; GO:0003700,DNA-binding transcription factor activity; GO:0006351,transcription, DNA-templated	SWI5-dependent HO expression protein 3
g4766	LOB	TF	LOB	90	14	-2.62	down	LG2	3938571	3939920	-	--	--	K13944 LOB domain-containing protein 16 | (RefSeq) LBD16; lateral organ boundaries-domain 16 (A)	PREDICTED: LOB domain-containing protein 1 [Ipomoea nil]	RecName: Full=LOB domain-containing protein 1; AltName: Full=ASYMMETRIC LEAVES 2-like protein 8; Short=AS2-like protein 8;	SubName: Full=LOB domain-containing protein 1-like {ECO:0000313|RefSeq:XP_016577623.1};	--	GO:0005739,mitochondrion	Lateral organ boundaries (LOB) domain
g48029	B3-ARF	TF	B3->B3-ARF	6075	2386	-1.349	down	LG12	8572119	8578621	+	--	--	K14486 auxin response factor | (RefSeq) ETT; Transcriptional factor B3 family protein / auxin-responsive factor AUX/IAA-like protein (A)	PREDICTED: auxin response factor 4-like [Ipomoea nil]	RecName: Full=Auxin response factor 4;	RecName: Full=Auxin response factor {ECO:0000256|RuleBase:RU004561};	--	GO:0005634,nucleus; GO:0003677,DNA binding; GO:0003700,DNA-binding transcription factor activity; GO:0010158,abaxial cell fate specification; GO:0009734,auxin-activated signaling pathway; GO:0006351,transcription, DNA-templated; GO:0010050,vegetative phase change	AUX/IAA family
g4815	MYB	TF	MYB->MYB	3610	1081	-1.74	down	LG2	4217056	4218600	-	--	--	K09422 transcription factor MYB, plant | (RefSeq) MYB59; myb domain protein 59 (A)	PREDICTED: transcription factor MYB59-like isoform X1 [Ipomoea nil]	RecName: Full=Transcription factor MYB48; AltName: Full=Myb-related protein 48; Short=AtMYB48;	--	Transcription factor, Myb superfamily	GO:0005634,nucleus; GO:0003700,DNA-binding transcription factor activity; GO:0000981,DNA-binding transcription factor activity, RNA polymerase II-specific; GO:0043565,sequence-specific DNA binding; GO:0001135,RNA polymerase II transcription regulator recruiting activity; GO:0044212,transcription regulatory region DNA binding; GO:0030154,cell differentiation; GO:0006357,regulation of transcription…	Myb-like DNA-binding domain
g48266	MYB	TF	MYB->MYB	261	856	1.719	up	LG12	10405280	10407162	+	--	--	K09422 transcription factor MYB, plant | (RefSeq) MYB59; myb domain protein 59 (A)	PREDICTED: myb-like protein M [Ipomoea nil]	RecName: Full=Transcription factor MYB48; AltName: Full=Myb-related protein 48; Short=AtMYB48;	--	Transcription factor, Myb superfamily	GO:0005634,nucleus; GO:0003700,DNA-binding transcription factor activity; GO:0000981,DNA-binding transcription factor activity, RNA polymerase II-specific; GO:0043565,sequence-specific DNA binding; GO:0001135,RNA polymerase II transcription regulator recruiting activity; GO:0044212,transcription regulatory region DNA binding; GO:0030154,cell differentiation; GO:0006357,regulation of transcription…	Myb-like DNA-binding domain
g48473	FAR1	TF	FAR1	11	36	1.767	up	LG12	11825499	11828944	+	--	--	K17604 zinc finger SWIM domain-containing protein 3 | (RefSeq) FRS8; FAR1-related sequence 8 (A)	--	RecName: Full=Protein FAR1-RELATED SEQUENCE 7;	--	--	GO:0005634,nucleus; GO:0003700,DNA-binding transcription factor activity; GO:0008270,zinc ion binding; GO:0010018,far-red light signaling pathway; GO:0042753,positive regulation of circadian rhythm; GO:0045893,positive regulation of transcription, DNA-templated; GO:0009585,red, far-red light phototransduction	SWIM zinc finger
g4932	GRAS	TF	GRAS	165	28	-2.557	down	LG2	4958669	4960758	+	--	--	K14494 DELLA protein | (RefSeq) RGL2; RGA-like 2 (A)	PREDICTED: scarecrow-like protein 30 [Ipomoea nil]	RecName: Full=Scarecrow-like protein 14; Short=AtSCL14; AltName: Full=GRAS family protein 2; Short=AtGRAS-2;	SubName: Full=Uncharacterized protein {ECO:0000313|EMBL:PIN25317.1};	--	GO:0005829,cytosol; GO:0005634,nucleus; GO:0003700,DNA-binding transcription factor activity; GO:0043565,sequence-specific DNA binding; GO:0045893,positive regulation of transcription, DNA-templated; GO:0006355,regulation of transcription, DNA-templated; GO:0009410,response to xenobiotic stimulus; GO:0006351,transcription, DNA-templated	GRAS domain family
g4934	GRAS	TF	GRAS	987	278	-1.829	down	LG2	4971449	4974786	+	--	--	K14494 DELLA protein | (RefSeq) GAI; GRAS family transcription factor family protein (A)	PREDICTED: scarecrow-like protein 30 [Ipomoea nil]	RecName: Full=Scarecrow-like protein 9; Short=AtSCL9; AltName: Full=GRAS family protein 13; Short=AtGRAS-13;	SubName: Full=Uncharacterized protein {ECO:0000313|EMBL:PHT99005.1};	--	GO:0005634,nucleus; GO:0003700,DNA-binding transcription factor activity; GO:0043565,sequence-specific DNA binding; GO:0006355,regulation of transcription, DNA-templated; GO:0006351,transcription, DNA-templated	GRAS domain family
g49399	Others	TR	Others	0	8	5.331	up	LG12	18713444	18715518	+	--	--	K12129 pseudo-response regulator 7 | (RefSeq) PRR7; pseudo-response regulator 7 (A)	PREDICTED: uncharacterized protein LOC109182571 [Ipomoea nil]	RecName: Full=Protein CHLOROPLAST IMPORT APPARATUS 2; Flags: Precursor;	SubName: Full=Uncharacterized protein {ECO:0000313|EMBL:KDP45740.1};	GATA-4/5/6 transcription factors	GO:0009507,chloroplast; GO:0005634,nucleus; GO:0045036,protein targeting to chloroplast; GO:0006355,regulation of transcription, DNA-templated	CCT motif
g49436	FAR1	TF	FAR1	9	37	1.965	up	LG12	18954776	18959217	+	--	--	K17604 zinc finger SWIM domain-containing protein 3 | (RefSeq) FRS8; FAR1-related sequence 8 (A)	PREDICTED: protein FAR1-RELATED SEQUENCE 5-like [Ipomoea nil]	RecName: Full=Protein FAR1-RELATED SEQUENCE 5;	SubName: Full=protein FAR1-RELATED SEQUENCE 5-like {ECO:0000313|RefSeq:XP_008781698.1, ECO:0000313|RefSeq:XP_017696902.1};	--	GO:0005634,nucleus; GO:0008270,zinc ion binding; GO:0006355,regulation of transcription, DNA-templated	MULE transposase domain
g49478	SET	TR	SET	140	41	-1.757	down	LG12	19295609	19299882	+	--	--	K11420 euchromatic histone-lysine N-methyltransferase [EC:2.1.1.43] | (RefSeq) SUVH3; histone-lysine N-methyltransferase, H3 lysine-9 specific SUVH3-like protein (A)	PREDICTED: histone-lysine N-methyltransferase SUVR4-like isoform X2 [Ipomoea nil]	RecName: Full=Histone-lysine N-methyltransferase SUVR4; EC=2.1.1.43; AltName: Full=Protein SET DOMAIN GROUP 31; AltName: Full=Suppressor of variegation 3-9-related protein 4; Short=Su(var)3-9-related protein 4;	SubName: Full=Uncharacterized protein {ECO:0000313|EMBL:GAY40240.1};	Histone H3 (Lys9) methyltransferase SUV39H1/Clr4, required for transcriptional silencing	GO:0005694,chromosome; GO:0005730,nucleolus; GO:0009506,plasmodesma; GO:0018024,histone-lysine N-methyltransferase activity; GO:0008270,zinc ion binding; GO:0034968,histone lysine methylation	Pre-SET motif
g495	FAR1	TF	FAR1	79	171	1.118	up	LG1	2723633	2726838	+	--	--	K17604 zinc finger SWIM domain-containing protein 3 | (RefSeq) FRS8; FAR1-related sequence 8 (A)	PREDICTED: protein FAR1-RELATED SEQUENCE 5-like [Ipomoea nil]	RecName: Full=Protein FAR1-RELATED SEQUENCE 5;	SubName: Full=Uncharacterized protein {ECO:0000313|EMBL:KDP24914.1};	--	GO:0005634,nucleus; GO:0008270,zinc ion binding; GO:0006355,regulation of transcription, DNA-templated	RNase H-like domain found in reverse transcriptase
g4984	MYB-related	TF	MYB->MYB-related	131	31	-2.048	down	LG2	5245720	5247809	+	--	--	--	PREDICTED: transcription factor DIVARICATA-like [Ipomoea nil]	RecName: Full=Transcription factor DIVARICATA;	SubName: Full=transcription factor DIVARICATA-like {ECO:0000313|RefSeq:XP_016577712.1};	Zuotin and related molecular chaperones (DnaJ superfamily), contains DNA-binding domains	GO:0005634,nucleus; GO:0003677,DNA binding; GO:0048262,determination of dorsal/ventral asymmetry; GO:0009908,flower development; GO:0006355,regulation of transcription, DNA-templated; GO:0006351,transcription, DNA-templated	Myb-like DNA-binding domain
g49910	C2C2-CO-like	TF	C2C2->C2C2-CO-like	638	194	-1.715	down	LG12	22651791	22653237	-	--	--	K12135 zinc finger protein CONSTANS | (RefSeq) CO; B-box type zinc finger protein with CCT domain-containing protein (A)	PREDICTED: zinc finger protein CONSTANS-LIKE 5-like isoform X2 [Ipomoea nil]	RecName: Full=Zinc finger protein CONSTANS-LIKE 5;	SubName: Full=Uncharacterized protein {ECO:0000313|EMBL:CDP02934.1};	GATA-4/5/6 transcription factors	GO:0005634,nucleus; GO:0003700,DNA-binding transcription factor activity; GO:0008270,zinc ion binding; GO:0048571,long-day photoperiodism; GO:0048579,negative regulation of long-day photoperiodism, flowering; GO:0045892,negative regulation of transcription, DNA-templated; GO:0048576,positive regulation of short-day photoperiodism, flowering; GO:0009909,regulation of flower development; GO:0006355…	B-box zinc finger
g49997	MYB	TF	MYB->MYB	64	150	1.229	up	LG12	23349671	23351107	+	--	--	K09422 transcription factor MYB, plant | (RefSeq) MYB62; myb domain protein 62 (A)	PREDICTED: transcription factor MYB24-like [Ipomoea nil]	RecName: Full=Transcription factor MYB62 {ECO:0000303|PubMed:9839469}; AltName: Full=Myb-related protein 62 {ECO:0000303|PubMed:9839469}; Short=AtMYB62 {ECO:0000303|PubMed:9839469};	SubName: Full=Transcription factor myb108 {ECO:0000313|EMBL:OIS95762.1};	Transcription factor, Myb superfamily	GO:0005634,nucleus; GO:0003700,DNA-binding transcription factor activity; GO:0000981,DNA-binding transcription factor activity, RNA polymerase II-specific; GO:0043565,sequence-specific DNA binding; GO:0001135,RNA polymerase II transcription regulator recruiting activity; GO:0044212,transcription regulatory region DNA binding; GO:0030154,cell differentiation; GO:0016036,cellular response to phosph…	Myb-like DNA-binding domain
g50208	HB-HD-ZIP	TF	HB->HB-HD-ZIP	16	2	-3.275	down	LG12	24928891	24931486	+	--	--	K09338 homeobox-leucine zipper protein | (RefSeq) HB17; homeobox-leucine zipper protein 17 (A)	PREDICTED: homeobox-leucine zipper protein HOX3-like [Ipomoea nil]	RecName: Full=Homeobox-leucine zipper protein HOX3; AltName: Full=HD-ZIP protein HOX3; AltName: Full=Homeodomain transcription factor HOX3; AltName: Full=OsHox3;	SubName: Full=Uncharacterized protein {ECO:0000313|EMBL:CDP00767.1};	Transcription factor HEX, contains HOX and HALZ domains	GO:0005634,nucleus; GO:0003700,DNA-binding transcription factor activity; GO:0043565,sequence-specific DNA binding; GO:0006351,transcription, DNA-templated	Homeobox KN domain
g50327	GNAT	TR	GNAT	111	33	-1.728	down	LG12	25919517	25920609	-	--	--	K22883 L-ornithine N5-acetyltransferase [EC:2.3.1.-] | (RefSeq) Acyl-CoA N-acyltransferases (NAT) superfamily protein (A)	--	RecName: Full=Tyramine N-feruloyltransferase 4/11; EC=2.3.1.110; AltName: Full=Hydroxycinnamoyl-CoA: tyramine N-hydroxycinnamoyltransferase;	SubName: Full=tyramine N-feruloyltransferase 4/11 {ECO:0000313|RefSeq:XP_009795400.1};	Diamine acetyltransferase	GO:0005737,cytoplasm; GO:0008080,N-acetyltransferase activity; GO:0050366,tyramine N-feruloyltransferase activity	Acetyltransferase (GNAT) family
g50353	Others	TR	Others	965	250	-1.945	down	LG12	26116045	26117633	+	--	--	K12135 zinc finger protein CONSTANS | (RefSeq) CO; B-box type zinc finger protein with CCT domain-containing protein (A)	--	RecName: Full=Zinc finger protein CONSTANS-LIKE 3;	SubName: Full=zinc finger protein CONSTANS-LIKE 4-like {ECO:0000313|RefSeq:XP_016463845.1};	GATA-4/5/6 transcription factors	GO:0005634,nucleus; GO:0003700,DNA-binding transcription factor activity; GO:0043565,sequence-specific DNA binding; GO:0008270,zinc ion binding; GO:0010161,red light signaling pathway; GO:0009909,regulation of flower development; GO:0010099,regulation of photomorphogenesis	Cytoplasmic polyadenylation element-binding protein ZZ domain
g50361	DBB	TF	DBB	2293	855	-1.424	down	LG12	26181762	26182700	-	--	--	K12135 zinc finger protein CONSTANS | (RefSeq) CO; B-box type zinc finger protein with CCT domain-containing protein (A)	--	RecName: Full=Zinc finger protein CONSTANS-LIKE 3;	SubName: Full=GATA-4/5/6 transcription factor {ECO:0000313|EMBL:PIM97960.1};	GATA-4/5/6 transcription factors	GO:0005634,nucleus; GO:0003700,DNA-binding transcription factor activity; GO:0043565,sequence-specific DNA binding; GO:0008270,zinc ion binding; GO:0010161,red light signaling pathway; GO:0009909,regulation of flower development; GO:0010099,regulation of photomorphogenesis	Cytoplasmic polyadenylation element-binding protein ZZ domain
g50362	Others	TR	Others	743	233	-1.674	down	LG12	26183085	26183962	+	--	--	K12135 zinc finger protein CONSTANS | (RefSeq) CO; B-box type zinc finger protein with CCT domain-containing protein (A)	--	RecName: Full=Zinc finger protein CONSTANS-LIKE 5;	SubName: Full=zinc finger protein CONSTANS-LIKE 4-like {ECO:0000313|RefSeq:XP_009758697.1};	GATA-4/5/6 transcription factors	GO:0005634,nucleus; GO:0003700,DNA-binding transcription factor activity; GO:0008270,zinc ion binding; GO:0048571,long-day photoperiodism; GO:0048579,negative regulation of long-day photoperiodism, flowering; GO:0045892,negative regulation of transcription, DNA-templated; GO:0048576,positive regulation of short-day photoperiodism, flowering; GO:0009909,regulation of flower development; GO:0006355…	CCT motif
g5064	WRKY	TF	WRKY	54	14	-2.013	down	LG2	5744377	5746905	-	--	--	K13424 WRKY transcription factor 33 | (RefSeq) WRKY33; WRKY DNA-binding protein 33 (A)	--	RecName: Full=WRKY transcription factor WRKY24 {ECO:0000303|PubMed:15047897}; Short=OsWRKY24 {ECO:0000303|PubMed:15047897};	--	--	GO:0005634,nucleus; GO:0003700,DNA-binding transcription factor activity; GO:0043565,sequence-specific DNA binding; GO:0009738,abscisic acid-activated signaling pathway; GO:0009740,gibberellic acid mediated signaling pathway; GO:0009788,negative regulation of abscisic acid-activated signaling pathway; GO:0009938,negative regulation of gibberellic acid mediated signaling pathway; GO:0045893,positi…	FLYWCH zinc finger domain
g507	NAC	TF	NAC	27	4	-2.901	down	LG1	2806534	2811125	-	--	--	--	--	RecName: Full=NAC domain-containing protein 45 {ECO:0000312|EMBL:AEE73912.1};	--	--	GO:0005634,nucleus; GO:0003700,DNA-binding transcription factor activity; GO:0044212,transcription regulatory region DNA binding; GO:0090603,sieve element differentiation; GO:0090602,sieve element enucleation; GO:0006351,transcription, DNA-templated	No apical meristem (NAM) protein
g510	MYB-related	TF	MYB->MYB-related	145	66	-1.141	down	LG1	2844680	2848290	+	--	--	K12134 circadian clock associated 1 | (RefSeq) CCA1; circadian clock associated 1 (A)	PREDICTED: protein REVEILLE 2-like [Ipomoea nil]	RecName: Full=Protein REVEILLE 1;	SubName: Full=Myb family transcription factor {ECO:0000313|EMBL:BAO57283.1};	Zuotin and related molecular chaperones (DnaJ superfamily), contains DNA-binding domains	GO:0005634,nucleus; GO:0003677,DNA binding; GO:0003700,DNA-binding transcription factor activity; GO:0009851,auxin biosynthetic process; GO:0009734,auxin-activated signaling pathway; GO:0007623,circadian rhythm; GO:0010600,regulation of auxin biosynthetic process; GO:0006355,regulation of transcription, DNA-templated; GO:0006351,transcription, DNA-templated	Myb DNA-binding like
g5103	AP2/ERF-ERF	TF	AP2/ERF->AP2/ERF-ERF	1950	523	-1.898	down	LG2	5988375	5989460	-	--	--	K09286 EREBP-like factor | (RefSeq) ERF10; ERF domain protein 10 (A)	PREDICTED: pathogenesis-related genes transcriptional activator PTI6-like [Ipomoea nil]	RecName: Full=Pathogenesis-related genes transcriptional activator PTI6; AltName: Full=PTO-interacting protein 6;	SubName: Full=pathogenesis-related genes transcriptional activator PTI6-like {ECO:0000313|RefSeq:XP_009767000.1};	--	GO:0005634,nucleus; GO:0003677,DNA binding; GO:0003700,DNA-binding transcription factor activity; GO:0006952,defense response; GO:0006351,transcription, DNA-templated	AP2 domain
g51150	ARID	TR	ARID	19	52	1.469	up	LG12	31538698	31541315	+	--	--	K09273 upstream-binding transcription factor | (RefSeq) 3xHMG-box1; HMG (high mobility group) box protein (A)	PREDICTED: high mobility group B protein 9 isoform X1 [Ipomoea nil]	RecName: Full=High mobility group B protein 9; AltName: Full=Nucleosome/chromatin assembly factor group D 09; Short=Nucleosome/chromatin assembly factor group D 9; AltName: Full=Protein NUCLEAR FUSION DEFECTIVE 9 {ECO:0000303|PubMed:16698901};	SubName: Full=High mobility group b protein 9 {ECO:0000313|EMBL:OIT08470.1};	DNA-binding proteins Bright/BRCAA1/RBP1 and related proteins containing BRIGHT domain	GO:0005634,nucleus; GO:0003677,DNA binding; GO:0003700,DNA-binding transcription factor activity; GO:0000741,karyogamy; GO:0010197,polar nucleus fusion; GO:0006355,regulation of transcription, DNA-templated; GO:0006351,transcription, DNA-templated	HMG (high mobility group) box 5
g51198	AUX/IAA	TR	AUX/IAA	384	90	-2.092	down	LG13	232832	238007	-	--	--	K14484 auxin-responsive protein IAA | (RefSeq) AXR3; AUX/IAA transcriptional regulator family protein (A)	PREDICTED: auxin-responsive protein IAA1-like isoform X2 [Ipomoea nil]	RecName: Full=Auxin-responsive protein IAA17; AltName: Full=Auxin response 3; AltName: Full=Indoleacetic acid-induced protein 17;	RecName: Full=Auxin-responsive protein {ECO:0000256|RuleBase:RU004549};	--	GO:0005634,nucleus; GO:0003700,DNA-binding transcription factor activity; GO:0042802,identical protein binding; GO:0009734,auxin-activated signaling pathway; GO:1900057,positive regulation of leaf senescence; GO:0009733,response to auxin; GO:0006351,transcription, DNA-templated	AUX/IAA family
g51272	FAR1	TF	FAR1	13	58	2.184	up	LG13	851179	855555	-	--	--	K17604 zinc finger SWIM domain-containing protein 3 | (RefSeq) FRS8; FAR1-related sequence 8 (A)	PREDICTED: protein FAR1-RELATED SEQUENCE 5-like [Ipomoea nil]	RecName: Full=Protein FAR1-RELATED SEQUENCE 3;	SubName: Full=Uncharacterized protein {ECO:0000313|EMBL:ONI22741.1};	--	GO:0005634,nucleus; GO:0009506,plasmodesma; GO:0008270,zinc ion binding; GO:0006355,regulation of transcription, DNA-templated	SWIM zinc finger
g51746	WRKY	TF	WRKY	76	6	-3.677	down	LG13	4201055	4203071	+	--	--	K18834 WRKY transcription factor 1 | (RefSeq) ZAP1; zinc-dependent activator protein-1 (A)	PREDICTED: probable WRKY transcription factor 40 isoform X2 [Ipomoea nil]	RecName: Full=Probable WRKY transcription factor 40; AltName: Full=WRKY DNA-binding protein 40;	SubName: Full=Uncharacterized protein {ECO:0000313|EMBL:CDO98227.1};	--	GO:0005634,nucleus; GO:0003700,DNA-binding transcription factor activity; GO:0043565,sequence-specific DNA binding; GO:0044212,transcription regulatory region DNA binding; GO:0042742,defense response to bacterium; GO:0050832,defense response to fungus; GO:0045892,negative regulation of transcription, DNA-templated; GO:0031347,regulation of defense response; GO:0010200,response to chitin; GO:00022…	WRKY DNA -binding domain
g51968	AP2/ERF-AP2	TF	AP2/ERF->AP2/ERF-AP2	342	113	-1.605	down	LG13	5937845	5943123	-	--	--	K09285 AP2-like factor, ANT lineage | (RefSeq) ADAP; ARIA-interacting double AP2 domain protein (A)	AP2/ERF domain [Macleaya cordata]	RecName: Full=AP2-like ethylene-responsive transcription factor At1g16060;	SubName: Full=AP2/ERF domain {ECO:0000313|EMBL:OVA06926.1};	--	GO:0005634,nucleus; GO:0003677,DNA binding; GO:0003700,DNA-binding transcription factor activity; GO:0000981,DNA-binding transcription factor activity, RNA polymerase II-specific; GO:0009873,ethylene-activated signaling pathway; GO:0007275,multicellular organism development; GO:0010187,negative regulation of seed germination; GO:1901959,positive regulation of cutin biosynthetic process; GO:004572…	Glycosyl hydrolase family 98
g528	AP2/ERF-ERF	TF	AP2/ERF->AP2/ERF-ERF	24	3	-3.007	down	LG1	2964145	2965275	-	--	--	K14516 ethylene-responsive transcription factor 1 | (RefSeq) ERF1; ethylene response factor 1 (A)	PREDICTED: ethylene-responsive transcription factor 1B-like [Ipomoea nil]	RecName: Full=Ethylene-responsive transcription factor 1B; Short=AtERF1B; AltName: Full=Ethylene-responsive element-binding factor 1B; Short=EREBP-1B;	SubName: Full=ERF1 {ECO:0000313|EMBL:AMS25578.1}; Flags: Fragment;	--	GO:0005634,nucleus; GO:0003677,DNA binding; GO:0003700,DNA-binding transcription factor activity; GO:0006952,defense response; GO:0009873,ethylene-activated signaling pathway; GO:0009867,jasmonic acid mediated signaling pathway; GO:0006351,transcription, DNA-templated	AP2 domain
g52855	bHLH	TF	bHLH	129	12	-3.366	down	LG13	12384484	12387800	-	--	--	K12126 phytochrome-interacting factor 3 | (RefSeq) PIF3; phytochrome interacting factor 3 (A)	PREDICTED: transcription factor BEE 1-like isoform X1 [Ipomoea nil]	RecName: Full=Transcription factor BEE 1; AltName: Full=Basic helix-loop-helix protein 44; Short=AtbHLH44; Short=bHLH 44; AltName: Full=Protein Brassinosteroid enhanced expression 1; AltName: Full=Transcription factor EN 77; AltName: Full=bHLH transcription factor bHLH044;	SubName: Full=Transcription factor bee 3 {ECO:0000313|EMBL:OIS96225.1};	--	GO:0005634,nucleus; GO:0003677,DNA binding; GO:0003700,DNA-binding transcription factor activity; GO:0046983,protein dimerization activity; GO:1902448,positive regulation of shade avoidance; GO:0006355,regulation of transcription, DNA-templated; GO:0006351,transcription, DNA-templated	Helix-loop-helix DNA-binding domain
g53151	C2C2-Dof	TF	C2C2->C2C2-Dof	212	88	-1.26	down	LG13	14480068	14481062	+	--	--	K16222 Dof zinc finger protein DOF5.5 | (RefSeq) CDF1; cycling DOF factor 1 (A)	PREDICTED: dof zinc finger protein DOF5.4-like [Ipomoea nil]	RecName: Full=Dof zinc finger protein DOF5.4; Short=AtDOF5.4; AltName: Full=OBF-binding protein 4;	SubName: Full=Uncharacterized protein {ECO:0000313|EMBL:CCB43158.1};	--	GO:0005634,nucleus; GO:0003700,DNA-binding transcription factor activity; GO:0046872,metal ion binding; GO:0044212,transcription regulatory region DNA binding; GO:0006355,regulation of transcription, DNA-templated; GO:0006351,transcription, DNA-templated	Dof domain, zinc finger
g53645	Others	TR	Others	93	27	-1.772	down	LG13	18448644	18452536	+	--	--	K14492 two-component response regulator ARR-A family | (RefSeq) ARR6; response regulator 6 (A)	PREDICTED: two-component response regulator ARR5-like [Ipomoea nil]	RecName: Full=Two-component response regulator ARR6;	SubName: Full=Type-A response regulator {ECO:0000313|EMBL:AAQ10675.1};	GATA-4/5/6 transcription factors	GO:0005634,nucleus; GO:0000156,phosphorelay response regulator activity; GO:0009736,cytokinin-activated signaling pathway; GO:0006355,regulation of transcription, DNA-templated; GO:0009735,response to cytokinin; GO:0006351,transcription, DNA-templated	Response regulator receiver domain
g53661	E2F-DP	TF	E2F-DP	62	27	-1.177	down	LG13	18549523	18552573	+	--	--	K06620 transcription factor E2F3 | (RefSeq) E2F1; E2F transcription factor 1 (A)	PREDICTED: E2F transcription factor-like E2FE isoform X1 [Ipomoea nil]	RecName: Full=E2F transcription factor-like E2FE; AltName: Full=DP-E2F-like protein 1; AltName: Full=E2F-like repressor E2L3;	SubName: Full=Putative E2F transcription factor-like E2FE-like {ECO:0000313|EMBL:JAP27608.1};	Transcription factor E2F/dimerization partner (TDP)-like proteins	GO:0005634,nucleus; GO:0005667,transcription factor complex; GO:0003677,DNA binding; GO:0003700,DNA-binding transcription factor activity; GO:0042023,DNA endoreduplication; GO:0032876,negative regulation of DNA endoreduplication; GO:0006351,transcription, DNA-templated	Sugar-specific transcriptional regulator TrmB
g53686	C2H2	TF	C2H2	10	44	2.143	up	LG13	18732469	18733234	+	--	--	--	PREDICTED: zinc finger protein JAGGED-like [Ipomoea nil]	RecName: Full=Zinc finger protein GIS3 {ECO:0000305}; AltName: Full=Protein GLABROUS INFLORESCENCE STEMS 3 {ECO:0000303|PubMed:25640859};	SubName: Full=Uncharacterized protein {ECO:0000313|EnsemblPlants:PGSC0003DMT400062866};	--	GO:0005634,nucleus; GO:0003700,DNA-binding transcription factor activity; GO:0046872,metal ion binding; GO:0043565,sequence-specific DNA binding; GO:0044212,transcription regulatory region DNA binding; GO:0009736,cytokinin-activated signaling pathway; GO:0009740,gibberellic acid mediated signaling pathway; GO:0019760,glucosinolate metabolic process; GO:0007275,multicellular organism development; …	C2H2-type zinc finger
g53874	TAZ	TR	TAZ	1542	4023	1.384	up	LG13	20135793	20139163	-	--	--	K10523 speckle-type POZ protein | (RefSeq) BTB/POZ domain-containing protein (A)	PREDICTED: BTB/POZ and TAZ domain-containing protein 1-like [Ipomoea nil]	RecName: Full=BTB/POZ and TAZ domain-containing protein 1; AltName: Full=BTB and TAZ domain protein 1;	SubName: Full=Uncharacterized protein {ECO:0000313|EMBL:CDP15082.1};	CREB binding protein/P300 and related TAZ Zn-finger proteins	GO:0005737,cytoplasm; GO:0005634,nucleus; GO:0019005,SCF ubiquitin ligase complex; GO:0005516,calmodulin binding; GO:0004402,histone acetyltransferase activity; GO:0003712,transcription coregulator activity; GO:0031625,ubiquitin protein ligase binding; GO:0008270,zinc ion binding; GO:0009553,embryo sac development; GO:0009555,pollen development; GO:0043161,proteasome-mediated ubiquitin-dependent …	TAZ zinc finger
g540	Tify	TF	Tify	79	23	-1.804	down	LG1	3059015	3061177	+	--	--	--	JAZ2b [Ipomoea batatas]	--	SubName: Full=JAZ2b {ECO:0000313|EMBL:APA19300.1};	--	--	Divergent CCT motif
g54136	NAC	TF	NAC	321	131	-1.298	down	LG13	21935393	21936896	-	--	--	--	PREDICTED: NAC domain-containing protein 72-like [Ipomoea nil]	RecName: Full=NAC domain-containing protein 72; Short=ANAC072; AltName: Full=Protein RESPONSIVE TO DESICCATION 26;	SubName: Full=NAC domain-containing protein 72-like {ECO:0000313|RefSeq:XP_016484889.1};	--	GO:0005634,nucleus; GO:0003677,DNA binding; GO:0006355,regulation of transcription, DNA-templated; GO:0006351,transcription, DNA-templated	No apical meristem (NAM) protein
g54166	C2C2-Dof	TF	C2C2->C2C2-Dof	23	5	-2.237	down	LG13	22134603	22135978	-	--	--	K16222 Dof zinc finger protein DOF5.5 | (RefSeq) CDF1; cycling DOF factor 1 (A)	PREDICTED: dof zinc finger protein DOF3.4-like [Ipomoea nil]	RecName: Full=Dof zinc finger protein MNB1A;	SubName: Full=dof zinc finger protein DOF3.4-like {ECO:0000313|RefSeq:XP_016571456.1};	--	GO:0005634,nucleus; GO:0003677,DNA binding; GO:0003700,DNA-binding transcription factor activity; GO:0044212,transcription regulatory region DNA binding; GO:0008270,zinc ion binding; GO:0006355,regulation of transcription, DNA-templated; GO:0006351,transcription, DNA-templated	--
g54228	SBP	TF	SBP	728	213	-1.777	down	LG13	22597272	22598340	+	--	--	--	PREDICTED: squamosa promoter-binding-like protein 3 [Ipomoea nil]	RecName: Full=Squamosa promoter-binding protein 1;	SubName: Full=Uncharacterized protein {ECO:0000313|EMBL:OAY54847.1};	--	GO:0005634,nucleus; GO:0003677,DNA binding; GO:0003700,DNA-binding transcription factor activity; GO:0046872,metal ion binding; GO:0009908,flower development; GO:0006351,transcription, DNA-templated	SBP domain
g54384	Others	TR	Others	3600	1289	-1.482	down	LG13	23569389	23570796	+	--	--	K12135 zinc finger protein CONSTANS | (RefSeq) CO; B-box type zinc finger protein with CCT domain-containing protein (A)	PREDICTED: zinc finger protein CONSTANS-LIKE 4-like [Ipomoea nil]	RecName: Full=Zinc finger protein CONSTANS-LIKE 4;	SubName: Full=Uncharacterized protein {ECO:0000313|EMBL:OIT00100.1};	--	GO:0005634,nucleus; GO:0008270,zinc ion binding; GO:0009909,regulation of flower development; GO:0009416,response to light stimulus	B-box zinc finger
g54457	SBP	TF	SBP	448	157	-1.518	down	LG13	23998829	24003634	+	--	--	--	PREDICTED: squamosa promoter-binding protein 1-like [Ipomoea nil]	RecName: Full=Squamosa promoter-binding protein 1;	--	--	GO:0005634,nucleus; GO:0003677,DNA binding; GO:0003700,DNA-binding transcription factor activity; GO:0046872,metal ion binding; GO:0009908,flower development; GO:0006351,transcription, DNA-templated	SBP domain
g54463	AP2/ERF-ERF	TF	AP2/ERF->AP2/ERF-ERF	769	131	-2.556	down	LG13	24033887	24035154	-	--	--	K09286 EREBP-like factor | (RefSeq) ERF9; erf domain protein 9 (A)	PREDICTED: ethylene-responsive transcription factor 4-like [Ipomoea nil]	RecName: Full=Ethylene-responsive transcription factor 4; AltName: Full=Ethylene-responsive element-binding factor 3; Short=EREBP-3; AltName: Full=Ethylene-responsive element-binding factor 4 homolog; AltName: Full=NsERF3;	--	--	GO:0005634,nucleus; GO:0003677,DNA binding; GO:0003700,DNA-binding transcription factor activity; GO:0006952,defense response; GO:0009873,ethylene-activated signaling pathway; GO:0006351,transcription, DNA-templated	AP2 domain
g54471	NAC	TF	NAC	38	11	-1.806	down	LG13	24097909	24100184	+	--	--	--	PREDICTED: NAC domain-containing protein 73-like [Ipomoea nil]	RecName: Full=NAC domain-containing protein 73 {ECO:0000303|PubMed:15029955}; Short=ANAC073 {ECO:0000303|PubMed:15029955}; AltName: Full=Protein SECONDARY WALL-ASSOCIATED NAC DOMAIN PROTEIN 2 {ECO:0000303|PubMed:18952777};	--	--	GO:0005634,nucleus; GO:0003700,DNA-binding transcription factor activity; GO:0043565,sequence-specific DNA binding; GO:0044212,transcription regulatory region DNA binding; GO:0045893,positive regulation of transcription, DNA-templated; GO:2000652,regulation of secondary cell wall biogenesis; GO:0006351,transcription, DNA-templated	No apical meristem (NAM) protein
g54532	HSF	TF	HSF	306	87	-1.813	down	LG13	24431169	24433206	+	--	--	K09419 heat shock transcription factor, other eukaryote | (RefSeq) RHA1; winged-helix DNA-binding transcription factor family protein (A)	PREDICTED: heat stress transcription factor A-4c-like [Ipomoea nil]	RecName: Full=Heat stress transcription factor A-4b; AltName: Full=Heat stress transcription factor 4; Short=OsHsf-04; AltName: Full=Heat stress transcription factor 9; Short=rHsf9;	--	Heat shock transcription factor	GO:0005737,cytoplasm; GO:0005634,nucleus; GO:0003700,DNA-binding transcription factor activity; GO:0043565,sequence-specific DNA binding; GO:0006351,transcription, DNA-templated	HSF-type DNA-binding
g54639	HSF	TF	HSF	346	132	-1.396	down	LG13	25048912	25050556	-	--	--	K09419 heat shock transcription factor, other eukaryote | (RefSeq) RHA1; winged-helix DNA-binding transcription factor family protein (A)	PREDICTED: heat stress transcription factor A-4c-like [Ipomoea nil]	RecName: Full=Heat stress transcription factor A-4c; Short=AtHsfA4c; AltName: Full=AtHsf-20; AltName: Full=Protein ROOT HANDEDNESS 1;	SubName: Full=Uncharacterized protein {ECO:0000313|EMBL:CCB47419.1};	Heat shock transcription factor	GO:0005634,nucleus; GO:0003700,DNA-binding transcription factor activity; GO:0043565,sequence-specific DNA binding; GO:0048530,fruit morphogenesis; GO:0048527,lateral root development; GO:0009958,positive gravitropism; GO:0009733,response to auxin; GO:0009408,response to heat; GO:0048364,root development; GO:0006351,transcription, DNA-templated	Protein of unknown function (DUF3450)
g54719	WRKY	TF	WRKY	60	28	-1.13	down	LG13	25532350	25535306	-	--	--	K13424 WRKY transcription factor 33 | (RefSeq) WRKY33; WRKY DNA-binding protein 33 (A)	PREDICTED: probable WRKY transcription factor 31 [Ipomoea nil]	RecName: Full=WRKY transcription factor 6 {ECO:0000303|PubMed:11722756}; AltName: Full=WRKY DNA-binding protein 6 {ECO:0000303|PubMed:11722756}; Short=AtWRKY6 {ECO:0000303|PubMed:11722756};	SubName: Full=Uncharacterized protein {ECO:0000313|EnsemblPlants:PGSC0003DMT400038852};	--	GO:0005634,nucleus; GO:0003700,DNA-binding transcription factor activity; GO:0043565,sequence-specific DNA binding; GO:0044212,transcription regulatory region DNA binding; GO:0080169,cellular response to boron-containing substance deprivation; GO:0016036,cellular response to phosphate starvation; GO:0009873,ethylene-activated signaling pathway; GO:0045892,negative regulation of transcription, DNA…	Synaptonemal complex central element protein 1
g54721	WRKY	TF	WRKY	78	37	-1.083	down	LG13	25550103	25553076	-	--	--	K13424 WRKY transcription factor 33 | (RefSeq) WRKY33; WRKY DNA-binding protein 33 (A)	PREDICTED: probable WRKY transcription factor 31 [Ipomoea nil]	RecName: Full=Probable WRKY transcription factor 31; AltName: Full=WRKY DNA-binding protein 31;	SubName: Full=Uncharacterized protein {ECO:0000313|EMBL:CDP10754.1};	--	GO:0005634,nucleus; GO:0003700,DNA-binding transcription factor activity; GO:0043565,sequence-specific DNA binding; GO:0006351,transcription, DNA-templated	STAT protein, all-alpha domain
g54892	WRKY	TF	WRKY	55	12	-2.232	down	LG13	26620681	26622925	-	--	--	K18835 WRKY transcription factor 2 | (RefSeq) WRKY2; WRKY DNA-binding protein 2 (A)	PREDICTED: WRKY transcription factor WRKY24-like [Ipomoea nil]	RecName: Full=Probable WRKY transcription factor 2 {ECO:0000303|Ref.1}; AltName: Full=WRKY DNA-binding protein 2 {ECO:0000303|Ref.1};	SubName: Full=Putative wrky transcription factor 2 {ECO:0000313|EMBL:OIT03302.1};	--	GO:0005634,nucleus; GO:0003700,DNA-binding transcription factor activity; GO:0043565,sequence-specific DNA binding; GO:0030010,establishment of cell polarity; GO:0009942,longitudinal axis specification; GO:0009555,pollen development; GO:0006355,regulation of transcription, DNA-templated; GO:0006351,transcription, DNA-templated	WRKY DNA -binding domain
[truncated: 72 more rows]

## Sheet: S19-S2_vs_BS-S2
ID	Family	Category	Classification	S19S2	BSS2	log2FoldChange	regulated	chr	start	end	strand	gene_name	gene_description	KEGG	NR	Swissprot	Tremble	KOG	GO	Pfam
[truncated: 454 more rows]

## Sheet: S19-S4_vs_BS-S4
ID	Family	Category	Classification	S19S4	BSS4	log2FoldChange	regulated	chr	start	end	strand	gene_name	gene_description	KEGG	NR	Swissprot	Tremble	KOG	GO	Pfam
[truncated: 687 more rows]
