# Supplementary material for: Integrated Metabolomic and Transcriptomic Analyses Reveal the Basis for Carotenoid Biosynthesis in Sweet Potato (Ipomoea batatas (L.) Lam.) Storage Roots
Source: Metabolites. 2022 Oct 23;12(11):1010. doi: 10.3390/metabo12111010 (PMC9699360; doi:10.3390/metabo12111010)
Supplement: Supplementary file 1 [file metabolites-12-01010-s001.zip › Table S8. The gene-specific primers .xlsx]

## Sheet: Sheet1
Gene	Primer	Primer sequence
G12006	g12006-F	GCCATTGGTAGGCAGGGAT
	g12006-R	TGCAAGGGCTGACAGGGT
G12696	g12696-F	GTCGCATTGTATTCGTCA
	g12696-R	CTATCTTTGGATCGTGGC
G103	g103-F	AGCCATAGAAGAGGCAGAT
	g103-R	GCATTACCCAGTTTGTCC
G54338	g54338-F	CTATTTCAACAACCGCTTACTC
	G54338-R	TACTCCGAACCTGGCAAC
G34785	G34785-F	ACGAATTGGACACCGCATCA
	G34785-R	GTACAGTCCCGCGATTCCAG
G38486	G38486-F	CCTGGGAAGAAGATGAGGGG
	G38486-R	ATCCATGCGTTCCATGGTGT
G1548	G1548-F	GCCTCGTTCACAAGCGATTC
	G1548-R	ACAAGCCATATGGGACACCG
ARF-actin	ARF-actin-F	CTTTGCCAAGAAGGAGATGC
	ARF-actin-R	TCTTGTCCTGACCACCAACA
