# Supplementary figures and images for: Integrated Metabolomic and Transcriptomic Analyses Reveal the Basis for Carotenoid Biosynthesis in Sweet Potato (Ipomoea batatas (L.) Lam.) Storage Roots
Source: MDPI journal article supplement (doi:10.3390/metabo12111010), 2022-10-23

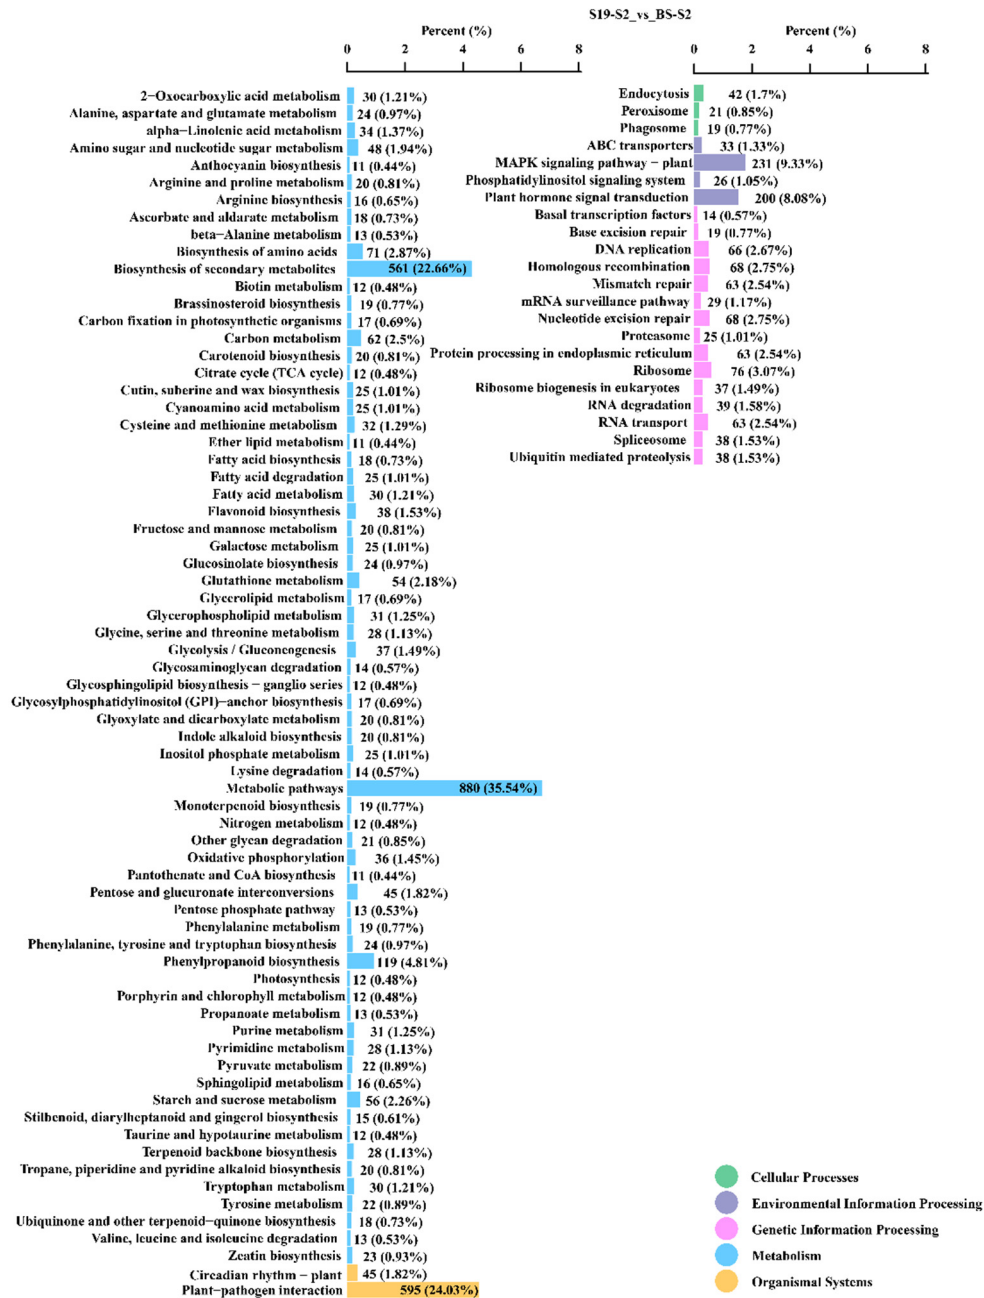

Supplementary Figure S3. KEGG classifications for the comparison of S19-S2 and BS-S2 samples.

Supplement: s1 [file s1]

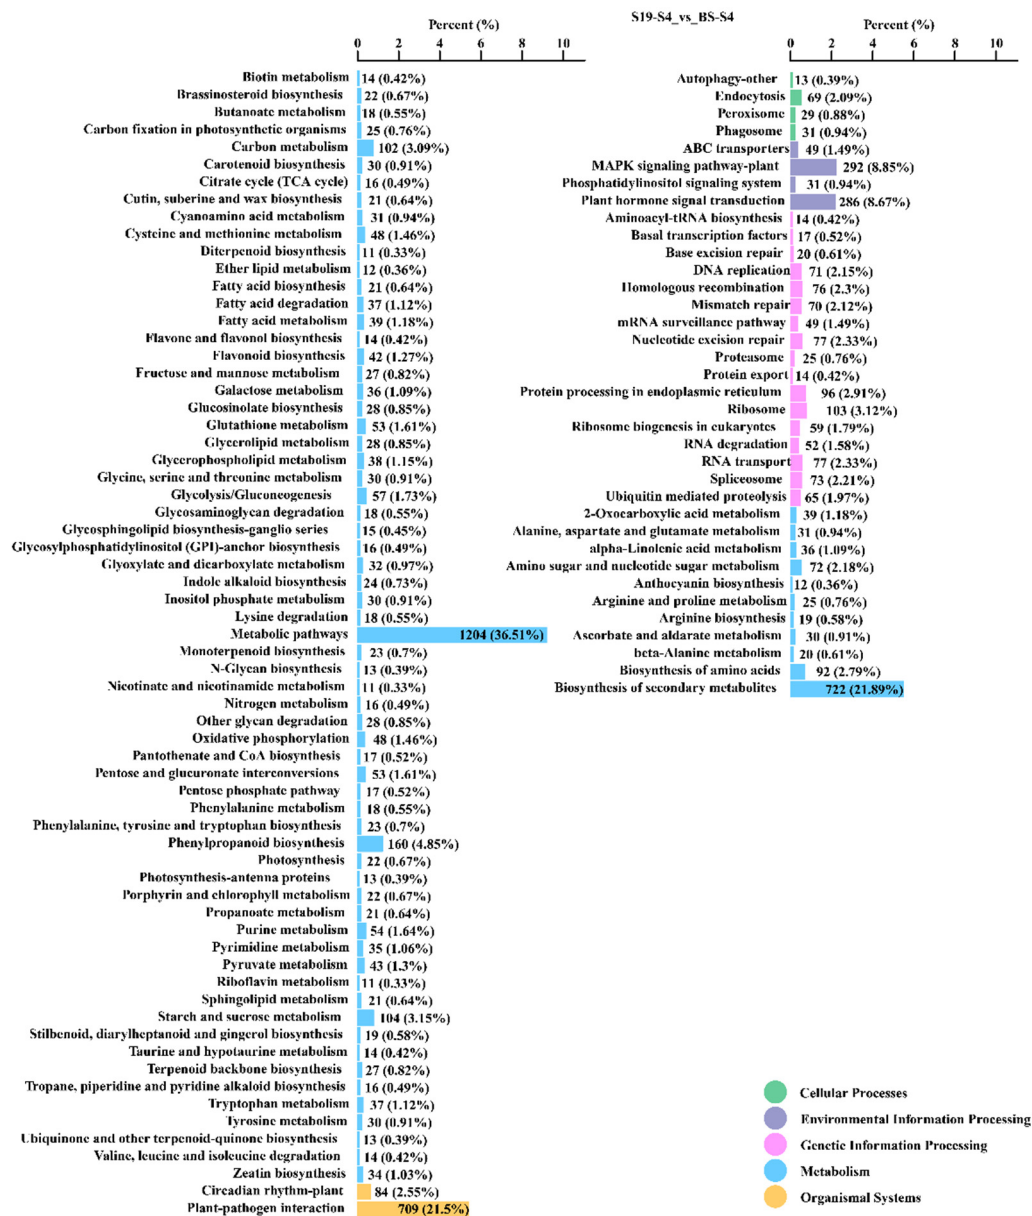

Supplementary Figure S4. KEGG classifications for the comparison of the S19-S4 and BS-S4 samples.

Supplement: s1 [file s1]

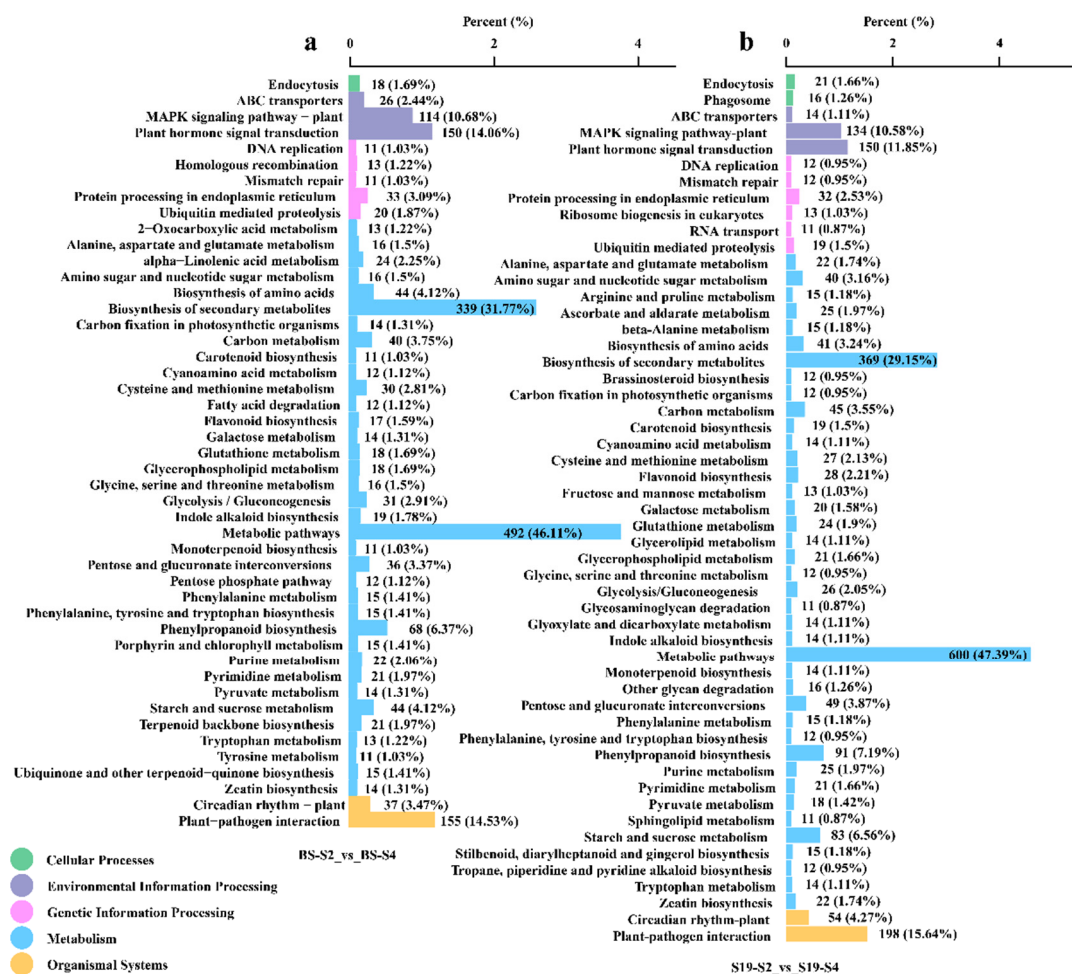

Supplementary Figure S2. KEGG classifications between different samples. (a) BS-S2 vs. BS-S4. (b) S19-S2 vs. S19-S4.

Supplement: s1 [file s1]
